# Supplementary material for: Whole genome sequencing of Clarireedia aff. paspali reveals potential pathogenesis factors in Clarireedia species, causal agents of dollar spot in turfgrass
Source: Front Genet. 2023 Jan 5;13:1033437. doi: 10.3389/fgene.2022.1033437 (PMC9849252; doi:10.3389/fgene.2022.1033437)
Supplement: Supplementary file 8 [file DataSheet1.xlsx]

## Sheet: Table S1
Table S1. List of 54 determinants involved in Sclerotinia sclerotiorum development and pathogenesis (Xia et al., 2019) and, the identification of their orthologs in Clarireedia species and Rutstroemia sydowiana
		Data from this study								Data from Xia et al. study (2019)
Gene Code (New)	Gene Code (Old)	Clarireedia aff. paspali			Clarireedia monteithiana		Clarireedia jacksonii		Rutstroemia sydowiana	Strains	Mutant Name	Gene Code (Old)	Mutant Type	Mutant Phenotypes						Secretion Signal	Tested Hosts	Other Functions	Reference
		H3	H2	Effector status	DRR09	RB-19	LWC-10	HRI11	CBS115975					Hyphal Growth	Sclerotial Formation	Oxalate Production	Virulence	Appressoria Formation	Induce Host HR/Resistance
sscle_01g003850	SS1G_02068	-	-	-	-	-	-	-	-	Ep-1PNA367, Heilongjiang, China	ssvp1	SS1G_02068	RNAi	-	NA	NA	+	NA	+	Yes	Canola (Zhongyou 821)	HR induction	[30]
sscle_01g004990	SS1G_01919	-	-	-	-	-	-	-	-	1980, Nebraska, USA	svf1	SS1G_01919	RNAi	-	NA	-	+	+	NA	No	Arabidopsis and canola (Zhongyou 821)	Cell wall integrity, ROS production	[31]
sscle_01g006030	SS1G_01788	tig00002064_pilon_C.paspali.g13132.t1	NODE_250_length_34118_cov_16.984940_C.Paspali_2	No	LLKI01014363.1_C.monteithiana	LLKG01000423.1_C.monteithiana_2	LLKH01003234.1_C.jacksonii	LNKV01000051.1_C.Jacksonnii_2	-	1980, Nebraska, USA	cna1	SS1G_01788	RNAi	+	+	-	+	-	NA	No	Arabiposis and tomato (Bonny Best)	Hyphal elongation	[32]
sscle_01g007450	SS1G_01614	-	-	-	-	-	-	-	-	Ep-1PNA367, Heilongjiang, China	sop1	SS1G_01614	RNAi	+	+	NA	+	NA	NA	No	Arabidopsis	Stress responses	[33]
sscle_01g011030	SS1G_01151	-	-	-	-	-	-	-	-	1980, Nebraska, USA	sfh1	SS1G_01151	RNAi	+	+	NA	+	+	NA	No	Soybean, common bean and tomato	ROS accumulation	[34]
sscle_02g013550	SS1G_12694	tig00000001_pilon_C.paspali.g1694.t1	NODE_6_length_369402_cov_16.886367_C.Paspali_2	No	LLKI01001061.1_C.monteithiana	LLKG01000623.1_C.monteithiana_2	LLKH01000969.1_C.jacksonii	LNKV01000040.1_C.Jacksonnii_2	JWJB01010277.1_R.sydowiana	HA61, Jiangsu, China	shk1	SS1G_12694	Deletion	+	+	NA	-	NA	NA	No	Rapeseed, strawberry, tomato and cucumber	Oxidative stresses, glycerol accumulation	[35]
sscle_02g020240	SS1G_04003	-	-	-	-	-	-	-	-	1980, Nebraska, USA	mat1-1-5	SS1G_04003	Deletion	-	-	NA	-	NA	NA	No	Tomato	Apothecial development	[29]
sscle_02g020250	SS1G_04004	-	-	-	-	-	-	-	-	1980, Nebraska, USA	mat1-1-1	SS1G_04004	Deletion	-	-	NA	-	NA	NA	No	Tomato	Apothecial development	[29]
sscle_02g020260	SS1G_04005	-	-	-	-	-	-	-	-	1980, Nebraska, USA	mat1-2-4	SS1G_04005	Deletion	-	-	NA	-	NA	NA	No	Tomato	Apothecial development, ascospore production	[29]
sscle_02g020270	SS1G_04006	-	-	-	-	-	-	-	-	1980, Nebraska, USA	mat1-2-1	SS1G_04006	Deletion	+	-	NA	-	NA	NA	No	Tomato	Apothecial development	[29]
sscle_03g025030	SS1G_00699	-	-	-	-	-	-	-	-	WMA1, Washington, USA	sod1	SS1G_00699	T-DNA	-	-	-	+	NA	NA	No	Pea (Guido)	Detoxification of host ROS	[36]
sscle_03g025030	SS1G_00699	-	-	-	-	-	-	-	-	1980, Nebraska, USA	sod1	SS1G_00699	Deletion	+	+	+	+	NA	NA	No	Tomato (Garden Peach) and tobacco	Oxidative stress tolerance, repression of host ROS	[37]
sscle_03g028510	SS1G_00263	-	-	-	-	-	-	-	-	Isolated from an infected canola stem, Alberta, Canada	v263	SS1G_00263	Deletion	-	NA	NA	+	NA	NA	Yes	Canola		[38]
sscle_03g031470	SS1G_13314	-	-	-	-	-	-	-	-	Isolated from diseased rapeseed, Alberta, Canada	scd1	SS1G_13314	Deletion	+	+	NA	-	NA	NA	No	Rapeseed (Westar)	Hyphal branching	[39]
sscle_03g031480	SS1G_13315	-	-	-	-	-	-	-	-	Isolated from diseased rapeseed, Alberta, Canada	thr1	SS1G_13315	Deletion	+	+	NA	-	NA	NA	No	Rapeseed (Westar)	Hyphal branching	[39]
sscle_03g031520	SS1G_13322	-	-	-	LLKI01004412.1_C.monteithiana	-	LLKH01001113.1_C.jacksonii	LNKV01000003.1_C.Jacksonnii_2	JWJB01010362.1_R.sydowiana	1980, Nebraska, U.S.A.; UF1, Florida; WMA, Washington, USA	pks13	SS1G_13322	Deletion by CRISPR	-	-	NA	-	+	NA	No	Soybean, canola, tomato (Better Boy), faba bean (Windsor) and pea (Sugar Daddy)	Pigmentation of compound appressoria	[40]
sscle_03g031670	SS1G_13339	-	-	-	-	-	-	-	JWJB01002739.1_R.sydowiana	274, Nebraska, USA	pth2	SS1G_13339	Deletion	+	+	+	+	+	NA	No	Soybean	Oxalic acid accumulation	[41]
sscle_04g034810	SS1G_02462	-	-	-	-	-	-	-	-	Isolated from an infected canola stem, Alberta, Canada	axp	SS1G_02462	Deletion	NA	NA	NA	+	NA	NA	Yes	Canola		[42]
sscle_04g034960	SS1G_02486	tig00002064_pilon_C.paspali.g11479.t1	NODE_47_length_214322_cov_16.664904_C.Paspali_2	Cytoplasmic effector (p = 0.796)	LLKI01014745.1_C.monteithiana	LLKG01002160.1_C.monteithiana_2	LLKH01001630.1_C.jacksonii	LNKV01000010.1_C.Jacksonnii_2	-	Sunf-M, Inner Mongolia, China	caf1	SS1G_02486	RNAi, T-DNA	+	+	-	+	+	+	Yes	Arabidopsis, rapeseed, pak choi cabbage, hot pepper, tomato, cucumber and soybean		[43]
sscle_04g037170	SS1G_02784	-	-	-	-	-	-	-	-	1980, Nebraska, USA	scat1	SS1G_02784	Deletion	+	+	NA	+	NA	NA	No	Tomato (Garden Peach)	Modulation of ROS	[44]
sscle_04g038020	SS1G_02904	-	-	-	-	-	-	-	-	Ep-1PNA367, Heilongjiang, China	cvnh	SS1G_02904	RNAi	+	+	NA	+	NA	NA	Yes	Arabidopsis		[45]
sscle_05g046240	SS1G_05917	-	-	-	-	-	-	-	-	SUN-F-M, Inner Mongolia, China	sl2	SS1G_05917	RNAi	-	+	NA	-	NA	NA	Yes	Rapeseed and Arabidopsis	Cellular integrity	[46]
sscle_05g046390	SS1G_05899	-	-	-	-	-	-	-	-	1980, Nebraska, USA	trr1	SS1G_05899	RNAi	NA	+	NA	+	NA	NA	No	Arabidopsis and tobacco	Oxidative stress tolerance	[47]
sscle_05g046790	SS1G_05839	-	-	-	-	-	-	-	JWJB01010229.1_R.sydowiana	1980, Nebraska, USA	bi1	SS1G_05839	RNAi	+	-	-	+	NA	NA	No	Arabidopsis and tomato	Stress responses, hyphal tip branching	[48]
sscle_05g046830	SS1G_05834	-	-	-	-	-	-	-	-	JRUF1, Florida, USA	foxe2	SS1G_05834	Deletion, T-DNA	-	-	NA	-	-	NA	No	Tomato	Apothecial development	[49]
sscle_05g048220	SS1G_05661	tig00000001_pilon_C.paspali.g998.t1	NODE_31_length_258124_cov_16.488664_C.Paspali_2	No	LLKI01001112.1_C.monteithiana	LLKG01001672.1_C.monteithiana_2	LLKH01001070.1_C.jacksonii	LNKV01000055.1_C.Jacksonnii_2	-	1980, Nebraska, USA	nox1	SS1G_05661	RNAi	-	+	+	+	NA	NA	No	Tomato (Rutger)	ROS regulation	[50]
sscle_06g049430	SS1G_07404	-	-	-	-	-	-	-	-	1980, Nebraska, USA	rhs1	SS1G_07404	RNAi	+	+	-	+	+	NA	Yes	Arabidopsis and canola (Zhongshuang 9)		[51]
sscle_06g049780	SS1G_07360	-	-	-	-	-	-	-	-	1980, Nebraska, USA	fkh1	SS1G_07360	RNAi	+	+	NA	+	NA	NA	No	Tomato	Cellular integrity	[52]
sscle_06g049830	SS1G_07355	tig00025241_pilon_C.paspali.g13333.t1	NODE_14_length_332117_cov_16.789946_C.Paspali_2	No	LLKI01014101.1_C.monteithiana	LLKG01000913.1_C.monteithiana_2	LLKH01000254.1_C.jacksonii	LNKV01000012.1_C.Jacksonnii_2	-	1980, Nebraska, USA	pac1	SS1G_07355	Deletion	-	+	+	+	NA	NA	No	Arabidopsis and tomato (Bonnie Best)		[53]
sscle_06g049890	SS1G_07345	-	-	-	-	-	-	-	-	NGA4, Anhui, China	pemg1	SS1G_07345	RNAi	+	NA	-	+	+	NA	No	Oilseed rape and soybean	Negative regulator of growth and virulence	[54]
sscle_06g051560	SS1G_07136	tig00000058_pilon_C.paspali.g7993.t1	NODE_102_length_133044_cov_17.029017_C.Paspali_2	No	LLKI01003296.1_C.monteithiana	LLKG01000445.1_C.monteithiana_2	LLKH01000385.1_C.jacksonii	LNKV01000012.1_C.Jacksonnii_2	JWJB01010103.1_R.sydowiana	UF1, Florida, USA	ste12	SS1G_07136	RNAi	+	+	NA	+	+	NA	No	Bush bean and tomato		[13]
sscle_07g055970	SS1G_03527	-	-	-	-	-	-	-	JWJB01010044.1_R.sydowiana	SUN-F-M, Inner Mongolia, China	hex1	SS1G_03527	RNAi	-	+	NA	NA	NA	NA	No		Cellular integrity	[46]
sscle_07g058030	SS1G_03252	tig00000001_pilon_C.paspali.g1946.t1	NODE_218_length_46512_cov_16.230148_C.Paspali_2	No	LLKI01014094.1_C.monteithiana	LLKG01000191.1_C.monteithiana_2	LLKH01000415.1_C.jacksonii	LNKV01000030.1_C.Jacksonnii_2	-	UF1, Florida, USA	ams2	SS1G_03252	RNAi	+	-	NA	+	+	NA	No	Common bean	Chromosome segregation, number and distribution of sclerotia	[55]
sscle_07g058620	SS1G_03171	tig00000001_pilon_C.paspali.g2842.t1	NODE_45_length_216848_cov_16.529039_C.Paspali_2	Cytoplasmic effector (p = 0.704)	LLKI01014768.1_C.monteithiana	LLKG01000964.1_C.monteithiana_2	LLKH01001610.1_C.jacksonii	LNKV01000009.1_C.Jacksonnii_2	-	1980, Nebraska, USA	pka1	SS1G_03171	Deletion	-	-	-	NA	NA	NA	No		PKA activity	[56]
sscle_07g059700	MK992913	-	-	-	-	-	-	-	-	1980, Nebraska, USA	qdo	MK992913	Deletion	-	NA	NA	+	NA	NA	Yes	Arabidopsis	Flavonol degradation	[57]
sscle_08g064670	SS1G_05163	-	-	-	-	-	-	-	-	1980, Nebraska, USA	cry1	SS1G_05163	Deletion	-	-	NA	-	NA	NA	No	Arabidopsis and tomato	Sclerotial mass, response to UV	[58]
sscle_08g065550	SS1G_05284	tig00000079_pilon_C.paspali.g9252.t1	NODE_11_length_344683_cov_16.689987_C.Paspali_2	Cytoplasmic effector (p = 0.792)	LLKI01004702.1_C.monteithiana	LLKG01003199.1_C.monteithiana_2	LLKH01000418.1_C.jacksonii	LNKV01000025.1_C.Jacksonnii_2	-	NGA4, Anhui, China	nacα	SS1G_05284	RNAi	-	-	-	+	NA	NA	No	Oilseed rape and tobacco		[59]
sscle_08g066770	SS1G_05445	tig00000029_pilon_C.paspali.g7144.t1	NODE_283_length_24398_cov_16.235098_C.Paspali_2	No	LLKI01000026.1_C.monteithiana	LLKG01001614.1_C.monteithiana_2	LLKH01003525.1_C.jacksonii	LNKV01000025.1_C.Jacksonnii_2	JWJB01010547.1_R.sydowiana	1980, Nebraska, USA	smk3	SS1G_05445	Deletion	+	+	NA	+	+	NA	No	Canola (Westar)	Cuticle penetration, cell wall integrity	[60]
sscle_08g067830	SS1G_05588	-	-	-	-	-	-	-	-	1980, Nebraska, U.S.A.	mads	SS1G_05588	RNAi	+	-	NA	+	NA	NA	No	Tomato		[61]
sscle_08g068500	SS1G_14133	-	-	-	-	-	-	-	-	Ep-1PNA367, Heilongjiang, China	itl	SS1G_14133	RNAi	+	+	NA	+	NA	+	Yes	Arabidopsis and canola	Hyphal branching, suppression of host defense	[62]
sscle_08g068530	SS1G_14127	-	-	-	-	-	-	-	-	1980, Nebraska, USA	ggt1	SS1G_14127	Deletion	-	+	NA	-	+	NA	Yes	Tomato		[63]
sscle_09g069850	SS1G_10796	-	-	-	-	-	-	-	-	1980, Nebraska, USA	odc2	SS1G_10796	Deletion	-	-	+	+	+	NA	Yes	Common bean (Bush Blue Lake 47), soybean (Harosoy), tomato (Bonnie Best) and celery		[64]
sscle_10g075560	SS1G_08218	-	-	-	-	-	-	-	-	WMA1, Washington, USA	oah	SS1G_08218	T-DNA	-	-	+	+	NA	NA	No	Faba bean (Broad Windsor), pea (Guido), green bean (Great North Tara) and soybean (Skylla)		[65]
sscle_10g075560	SS1G_08218	-	-	-	-	-	-	-	-	1980, Nebraska, USA	oah1	SS1G_08218	Deletion	-	+	+	+	+	NA	No	Tomato (Bonnie Best), common bean (Bush Blue Lake 47), soybean (Harosoy), canola, Arabidopsis and sunflower		[66]
sscle_10g075560	SS1G_08218	-	-	-	-	-	-	-	-	1980, Nebraska, U.S.A.; UF1, Florida; WMA, Washington, USA	oah1	SS1G_08218	Deletion by CRISPR	-	+	+	+	+	NA	No	Soybean, canola, tomato (Better Boy), faba bean (Windsor), and pea (Sugar Daddy)		[40]
sscle_10g077630	SS1G_08489	tig00000013_pilon_C.paspali	NODE_1_length_614195_cov_16.972003_C.Paspali_2	No	LLKI01014309.1_C.monteithiana	LLKG01000143.1_C.monteithiana_2	LLKH01000282.1_C.jacksonii	LNKV01000026.1_C.Jacksonnii_2	JWJB01002573.1_R.sydowiana	1980, Nebraska, USA	pph1	SS1G_08489	RNAi	+	+	NA	NA	NA	NA	No			[67]
sscle_10g079320	SS1G_14065	-	-	-	-	-	-	-	-	1980, Nebraska, USA	ssp1	SS1G_14065	Deletion	-	-	NA	NA	NA	NA	No		Resistance to glycoside-containing antibiotics	[68]
sscle_11g082700	SS1G_07871	-	-	-	LLKI01014381.1_C.monteithiana	LLKG01003435.1_C.monteithiana_2	-	-	JWJB01001193.1_R.sydowiana	1980, Nebraska, USA	rgb1	SS1G_07871	RNAi	-	+	NA	+	+	NA	No	Arabidopsis and tomato (Bonny Best)	MAPK pathway	[67]
sscle_11g083230	SS1G_07798	tig00002064_pilon_C.paspali	NODE_92_length_144654_cov_17.113244_C.Paspali_2	Cytoplasmic effector (0.728)	LLKI01000387.1_C.monteithiana	LLKG01001191.1_C.monteithiana_2	LLKH01003345.1_C.jacksonii	LNKV01000003.1_C.Jacksonnii_2	JWJB01010343.1_R.sydowiana	SUN-F-M, Inner Mongolia, China	gpd	SS1G_07798	RNAi	NA	+	NA	NA	NA	NA	No			[46]
sscle_11g083680	SS1G_07749	-	-	-	-	-	-	-	-	1980, Nebraska, USA	xyl1	SS1G_07749	Deletion	+	+	NA	+	NA	NA	Yes	Canola and Arabidopsis	Apothecia formation	[69]
sscle_11g083950	SS1G_07715	-	-	-	LLKI01014288.1_C.monteithiana	LLKG01000800.1_C.monteithiana_2	LLKH01000843.1_C.jacksonii	LNKV01000003.1_C.Jacksonnii_2	-	1980, Nebraska, USA	sac1	SS1G_07715	Deletion	+	+	-	+	NA	NA	No	Tomato (Bonnie Best)	Apothecia production, cAMP-signaling	[70]
sscle_12g087830	SS1G_11172	tig00000136_pilon_C.paspali	NODE_177_length_65729_cov_16.439047_C.Paspali_2	No	LLKI01003347.1_C.monteithiana	LLKG01003490.1_C.monteithiana_2	LLKH01002048.1_C.jacksonii	LNKV01000024.1_C.Jacksonnii_2	JWJB01010230.1_R.sydowiana	1980, Nebraska, USA	nox2	SS1G_11172	RNAi	-	+	-	-	NA	NA	No	Tomato (Rutger)	ROS regulation	[50]
sscle_12g090900	SS1G_11866	-	-	-	-	-	-	-	-	1980, Nebraska, USA	smk1	SS1G_11866	RNAi	+	+	NA	NA	NA	NA	No		pH-dependent regulation	[71]
sscle_14g099710	SS1G_08814	-	-	-	-	-	-	-	-	1980, Nebraska, USA	odc1	SS1G_08814	Deletion	-	NA	NA	-	NA	NA	Yes	Common bean (Bush Blue Lake 47), soybean (Harosoy) and tomato (Bonnie Best)		[64]
sscle_16g107670	SS1G_10096	-	-	-	-	-	-	-	-	1980, Nebraska, USA	cp1	SS1G_10096	Deletion	-	-	NA	+	NA	+	Yes	Arabidopsis and tobacco	Interaction with PR1	[72]
sscle_16g107670	SS1G_10096	-	-	-	-	-	-	-	-	FXGD2, Anhui, China	sm1	SS1G_10096	RNAi	+	+	-	+	NA	NA	Yes	Tobacco, oilseed rape and soybean		[73]
sscle_16g107930	SS1G_10135	-	-	-	-	-	-	-	-	1980, Nebraska, USA	fdh1	SS1G_10135	Deletion	-	+	NA	+	+	NA	No	Common bean and tomato	Osmotic oxidative stress resistance	[74]
sscle_16g109570	ANQ80447	-	-	-	-	-	-	-	-	1980, Nebraska, USA	nsd1	ANQ80447	Deletion	-	-	NA	+	+	NA	No	Tomato (Bonnie Best), celery and tomato	Ascogonia formation, apothecium development	[75]

## Sheet: Table S2
Table S2. List of 193 contigs of Clarireedia aff. paspali H3 assembly representing a total of 48.6 Mbp.
Contig name	Size (bp)	Cumulative lengh (bp)	Total genome covered (%)
tig00000001_pilon	10250504	10250504	21.0888
tig00002064_pilon	5921466	16171970	33.2713
tig00000003_pilon	3310489	19482459	40.0822
tig00000113_pilon	2803903	22286362	45.8508
tig00000017_pilon	2336226	24622588	50.6572
tig00000058_pilon	2334208	26956796	55.4595
tig00000136_pilon	1804399	28761195	59.1717
tig00000013_pilon	1789454	30550649	62.8533
tig00000077_pilon	1758897	32309546	66.4719
tig00000079_pilon	1728405	34037951	70.0279
tig00000029_pilon	1675486	35713437	73.4749
tig00000012_pilon	1299884	37013321	76.1492
tig00000004_pilon	1056071	38069392	78.3219
tig00000028_pilon	1037050	39106442	80.4555
tig00000021_pilon	803479	39909921	82.1085
tig00000002_pilon	771441	40681362	83.6957
tig00000022_pilon	589925	41271287	84.9093
tig00000122_pilon	458819	41730106	85.8533
tig00025243_pilon	458482	42188588	86.7965
tig00000019_pilon	442159	42630747	87.7062
tig00002062_pilon	425819	43056566	88.5823
tig00000081_pilon	396366	43452932	89.3977
tig00000093_pilon	393284	43846216	90.2069
tig00000085_pilon	371412	44217628	90.971
tig00000034_pilon	258868	44476496	91.5036
tig00000031_pilon	241025	44717521	91.9994
tig00000212_pilon	235449	44952970	92.4838
tig00000090_pilon	223322	45176292	92.9433
tig00000024_pilon	200369	45376661	93.3555
tig00000134_pilon	195535	45572196	93.7578
tig00000038_pilon	176213	45748409	94.1203
tig00000009_pilon	155247	45903656	94.4397
tig00000150_pilon	145734	46049390	94.7395
tig00000120_pilon	126731	46176121	95.0003
tig00000041_pilon	109765	46285886	95.2261
tig00000033_pilon	108375	46394261	95.4491
tig00025236_pilon	86748	46481009	95.6275
tig00000236_pilon	78390	46559399	95.7888
tig00000121_pilon	62975	46622374	95.9184
tig00000109_pilon	52471	46674845	96.0263
tig00000042_pilon	46021	46720866	96.121
tig00000057_pilon	34170	46755036	96.1913
tig00025233_pilon	25459	46780495	96.2437
tig00025232_pilon	25382	46805877	96.2959
tig00000378_pilon	25227	46831104	96.3478
tig00000197_pilon	25169	46856273	96.3996
tig00000082_pilon	25105	46881378	96.4512
tig00000381_pilon	23854	46905232	96.5003
tig00000390_pilon	23427	46928659	96.5485
tig00025234_pilon	22782	46951441	96.5954
tig00000262_pilon	22676	46974117	96.642
tig00000083_pilon	22330	46996447	96.688
tig00000139_pilon	22292	47018739	96.7338
tig00025230_pilon	21967	47040706	96.779
tig00025231_pilon	21938	47062644	96.8242
tig00000354_pilon	21322	47083966	96.868
tig00000011_pilon	20461	47104427	96.9101
tig00000214_pilon	19704	47124131	96.9507
tig00000108_pilon	19684	47143815	96.9912
tig00000157_pilon	19537	47163352	97.0314
tig00025238_pilon	19373	47182725	97.0712
tig00025239_pilon	19316	47202041	97.1109
tig00000147_pilon	18842	47220883	97.1497
tig00025241_pilon	18771	47239654	97.1883
tig00025240_pilon	18441	47258095	97.2263
tig00025235_pilon	18161	47276256	97.2636
tig00000274_pilon	17858	47294114	97.3004
tig00000217_pilon	17826	47311940	97.337
tig00000463_pilon	17734	47329674	97.3735
tig00000347_pilon	17691	47347365	97.4099
tig00000006_pilon	17412	47364777	97.4458
tig00000209_pilon	17171	47381948	97.4811
tig00000185_pilon	17159	47399107	97.5164
tig00000448_pilon	17060	47416167	97.5515
tig00001990_pilon	17022	47433189	97.5865
tig00000051_pilon	16751	47449940	97.621
tig00000032_pilon	16726	47466666	97.6554
tig00000383_pilon	16688	47483354	97.6897
tig00002023_pilon	16392	47499746	97.7234
tig00000486_pilon	16309	47516055	97.757
tig00025237_pilon	16223	47532278	97.7904
tig00000027_pilon	15953	47548231	97.8232
tig00000043_pilon	15687	47563918	97.8555
tig00000377_pilon	15673	47579591	97.8877
tig00000363_pilon	15669	47595260	97.9199
tig00000465_pilon	15499	47610759	97.9518
tig00000228_pilon	15299	47626058	97.9833
tig00000934_pilon	14921	47640979	98.014
tig00000422_pilon	14755	47655734	98.0444
tig00000755_pilon	14647	47670381	98.0745
tig00000417_pilon	14408	47684789	98.1041
tig00000553_pilon	14387	47699176	98.1337
tig00001284_pilon	14252	47713428	98.163
tig00001770_pilon	14249	47727677	98.1924
tig00001096_pilon	14076	47741753	98.2213
tig00000444_pilon	14037	47755790	98.2502
tig00000424_pilon	14023	47769813	98.2791
tig00000458_pilon	13681	47783494	98.3072
tig00000398_pilon	13635	47797129	98.3352
tig00000491_pilon	13494	47810623	98.363
tig00001423_pilon	13362	47823985	98.3905
tig00025259_pilon	13347	47837332	98.418
tig00025260_pilon	13338	47850670	98.4454
tig00000503_pilon	13266	47863936	98.4727
tig00001972_pilon	13173	47877109	98.4998
tig00002063_pilon	13144	47890253	98.5268
tig00001912_pilon	12611	47902864	98.5528
tig00001675_pilon	12442	47915306	98.5784
tig00001270_pilon	12114	47927420	98.6033
tig00000467_pilon	11895	47939315	98.6278
tig00000442_pilon	11712	47951027	98.6519
tig00000275_pilon	11707	47962734	98.676
tig00000432_pilon	11659	47974393	98.6999
tig00000440_pilon	11635	47986028	98.7239
tig00000473_pilon	11359	47997387	98.7472
tig00002045_pilon	11357	48008744	98.7706
tig00001211_pilon	11352	48020096	98.794
tig00001929_pilon	11071	48031167	98.8167
tig00000469_pilon	11016	48042183	98.8394
tig00000379_pilon	11003	48053186	98.862
tig00001691_pilon	10926	48064112	98.8845
tig00000897_pilon	10641	48074753	98.9064
tig00000117_pilon	10625	48085378	98.9283
tig00000426_pilon	10459	48095837	98.9498
tig00001805_pilon	10433	48106270	98.9713
tig00001731_pilon	10360	48116630	98.9926
tig00025252_pilon	10188	48126818	99.0135
tig00025251_pilon	10184	48137002	99.0345
tig00002015_pilon	10012	48147014	99.0551
tig00000403_pilon	9975	48156989	99.0756
tig00001400_pilon	9806	48166795	99.0958
tig00001275_pilon	9714	48176509	99.1158
tig00025253_pilon	9671	48186180	99.1357
tig00025254_pilon	9652	48195832	99.1555
tig00000388_pilon	9606	48205438	99.1753
tig00025247_pilon	9546	48214984	99.1949
tig00025248_pilon	9545	48224529	99.2146
tig00000429_pilon	9455	48233984	99.234
tig00000992_pilon	9433	48243417	99.2534
tig00000037_pilon	9287	48252704	99.2725
tig00001477_pilon	9202	48261906	99.2915
tig00025257_pilon	9167	48271073	99.3103
tig00025258_pilon	9160	48280233	99.3292
tig00000149_pilon	9152	48289385	99.348
tig00001647_pilon	9151	48298536	99.3668
tig00000451_pilon	9148	48307684	99.3856
tig00025256_pilon	8972	48316656	99.4041
tig00025255_pilon	8967	48325623	99.4225
tig00000453_pilon	8831	48334454	99.4407
tig00000573_pilon	8683	48343137	99.4586
tig00001324_pilon	8637	48351774	99.4763
tig00001831_pilon	8516	48360290	99.4939
tig00001479_pilon	8453	48368743	99.5113
tig00000612_pilon	8420	48377163	99.5286
tig00000396_pilon	8248	48385411	99.5455
tig00000399_pilon	8165	48393576	99.5623
tig00001811_pilon	8120	48401696	99.5791
tig00000434_pilon	8060	48409756	99.5956
tig00000401_pilon	8038	48417794	99.6122
tig00001194_pilon	7794	48425588	99.6282
tig00000862_pilon	7704	48433292	99.6441
tig00000567_pilon	7387	48440679	99.6593
tig00000408_pilon	7246	48447925	99.6742
tig00025242_pilon	7144	48455069	99.6889
tig00001372_pilon	7066	48462135	99.7034
tig00001476_pilon	7035	48469170	99.7179
tig00001856_pilon	6855	48476025	99.732
tig00000158_pilon	6783	48482808	99.7459
tig00025262_pilon	6738	48489546	99.7598
tig00025261_pilon	6729	48496275	99.7736
tig00000430_pilon	6407	48502682	99.7868
tig00000461_pilon	6405	48509087	99.8
tig00002034_pilon	6310	48515397	99.813
tig00001968_pilon	6234	48521631	99.8258
tig00001680_pilon	6207	48527838	99.8386
tig00000702_pilon	6187	48534025	99.8513
tig00000568_pilon	6069	48540094	99.8638
tig00000118_pilon	5931	48546025	99.876
tig00000115_pilon	5781	48551806	99.8879
tig00001694_pilon	5702	48557508	99.8996
tig00000562_pilon	5104	48562612	99.9101
tig00025250_pilon	5017	48567629	99.9204
tig00025249_pilon	4990	48572619	99.9307
tig00025244_pilon	4592	48577211	99.9401
tig00025245_pilon	4473	48581684	99.9494
tig00025246_pilon	3984	48585668	99.9575
tig00000487_pilon	3836	48589504	99.9654
tig00000773_pilon	3661	48593165	99.973
tig00001188_pilon	3424	48596589	99.98
tig00001279_pilon	3346	48599935	99.9869
tig00001820_pilon	2522	48602457	99.9921
tig00000572_pilon	2104	48604561	99.9964
tig00001095_pilon	1742	48606303	100

## Sheet: Table S3
Table S3. List of pathogenesis genes that were predicted by EffectorP as cytoplasmic or apoplastic effectors in Clarireedia aff. paspali
Gene_ID_qsseqID	Cytoplasmic_Effectot_Probability	Apoplastic_Effector_Probability	Type_Effector	sseqid	qlen	slen	qstart	qend	length	mismatch	gapopen	gaps	evalue	stitle	Scaffold	Start	End
g10019.t1	Y(0.978)	-	Cytoplasmiceffector	emb|CZR62272.1|	155	153	3	153	151	20	0	0	3.12e-92	mitochondrial [Phialocephala subalpina]	tig00000113_pilon_C.paspali	1719346	1720065
g10019.t1	Y(0.978)	-	Cytoplasmiceffector	gb|ESZ99110.1|	155	155	1	155	155	21	0	0	9.46e-93	mitochondria fission 1 protein [Sclerotinia borealis F-4128]	tig00000113_pilon_C.paspali	1719346	1720065
g10019.t1	Y(0.978)	-	Cytoplasmiceffector	gb|PQE29028.1|	155	183	3	155	153	6	0	0	1.07e-100	mitochondria fission 1 protein [Rutstroemia sp. NJR-2017a BBW]	tig00000113_pilon_C.paspali	1719346	1720065
g10019.t1	Y(0.978)	-	Cytoplasmiceffector	gb|PVH82667.1|	155	155	1	155	155	22	0	0	7.92e-95	mitochondrial fission 1 protein [Cadophora sp. DSE1049]	tig00000113_pilon_C.paspali	1719346	1720065
g10019.t1	Y(0.978)	-	Cytoplasmiceffector	gb|RDW79585.1|	155	155	1	155	155	20	0	0	9.12e-96	TPR-like protein [Coleophoma cylindrospora]	tig00000113_pilon_C.paspali	1719346	1720065
g10019.t1	Y(0.978)	-	Cytoplasmiceffector	gb|RDW91978.1|	155	155	1	155	155	19	0	0	3.14e-96	mitochondrial protein [Coleophoma crateriformis]	tig00000113_pilon_C.paspali	1719346	1720065
g10019.t1	Y(0.978)	-	Cytoplasmiceffector	gb|TGO75155.1|	155	155	1	155	155	21	0	0	6.81e-93	hypothetical protein BELL_0231g00090 [Botrytis elliptica]	tig00000113_pilon_C.paspali	1719346	1720065
g10019.t1	Y(0.978)	-	Cytoplasmiceffector	ref|XP_001548925.1|	155	155	1	155	155	20	0	0	5.96e-94	Bcfis1 [Botrytis cinerea B05.10]	tig00000113_pilon_C.paspali	1719346	1720065
g10019.t1	Y(0.978)	-	Cytoplasmiceffector	ref|XP_001597707.1|	155	155	1	155	155	21	0	0	2.74e-92	hypothetical protein SS1G_01903 [Sclerotinia sclerotiorum 1980 UF-70]	tig00000113_pilon_C.paspali	1719346	1720065
g10019.t1	Y(0.978)	-	Cytoplasmiceffector	ref|XP_024727424.1|	155	155	1	155	155	22	0	0	6.8e-94	mitochondrial fission 1 protein [Meliniomyces bicolor E]	tig00000113_pilon_C.paspali	1719346	1720065
g10047.t1	Y(0.989)	-	Cytoplasmiceffector	emb|SLM41143.1|	118	115	1	118	118	21	1	3	1.66e-64	pre-mrna branch site protein p14 [Umbilicaria pustulata]	tig00000113_pilon_C.paspali	1801685	1802417
g10047.t1	Y(0.989)	-	Cytoplasmiceffector	gb|EPQ65969.1|	118	115	1	118	118	20	1	3	1.81e-64	hypothetical protein BGT96224_1922 [Blumeria graminis f. sp. tritici 96224]	tig00000113_pilon_C.paspali	1801685	1802417
g10047.t1	Y(0.989)	-	Cytoplasmiceffector	gb|KHJ36244.1|	118	115	1	118	118	17	1	3	3.34e-66	putative pre-mrna branch site protein p14 [Erysiphe necator]	tig00000113_pilon_C.paspali	1801685	1802417
g10047.t1	Y(0.989)	-	Cytoplasmiceffector	gb|KIN04592.1|	118	115	1	118	118	17	1	3	1.15e-65	hypothetical protein OIDMADRAFT_142456 [Oidiodendron maius Zn]	tig00000113_pilon_C.paspali	1801685	1802417
g10047.t1	Y(0.989)	-	Cytoplasmiceffector	gb|PQE14195.1|	118	230	1	115	148	1	2	33	1.07e-69	pre-mRNA branch site p14 protein [Rutstroemia sp. NJR-2017a BVV2]	tig00000113_pilon_C.paspali	1801685	1802417
g10047.t1	Y(0.989)	-	Cytoplasmiceffector	gb|RFU28908.1|	118	115	1	118	118	18	1	3	1.73e-65	hypothetical protein B7463_g7417, partial [Scytalidium lignicola]	tig00000113_pilon_C.paspali	1801685	1802417
g10047.t1	Y(0.989)	-	Cytoplasmiceffector	gb|TAQ89953.1|	118	117	1	118	118	22	1	1	6.74e-65	hypothetical protein B7494_g1734 [Chlorociboria aeruginascens]	tig00000113_pilon_C.paspali	1801685	1802417
g10047.t1	Y(0.989)	-	Cytoplasmiceffector	ref|XP_001554116.1|	118	121	1	118	121	12	1	3	9.34e-71	hypothetical protein BCIN_07g04540 [Botrytis cinerea B05.10]	tig00000113_pilon_C.paspali	1801685	1802417
g10047.t1	Y(0.989)	-	Cytoplasmiceffector	ref|XP_018072881.1|	118	115	1	118	118	19	1	3	8.04e-65	pre-mRNA branch site protein p14 [Phialocephala scopiformis]	tig00000113_pilon_C.paspali	1801685	1802417
g10047.t1	Y(0.989)	-	Cytoplasmiceffector	ref|XP_024720498.1|	118	115	1	118	118	18	1	3	7.85e-66	hypothetical protein M430DRAFT_67301 [Amorphotheca resinae ATCC 22711]	tig00000113_pilon_C.paspali	1801685	1802417
g10053.t1	Y(0.922)	Y(0.55)	Cytoplasmic/apoplasticeffector	gb|RYD27169.1|	125	208	29	125	100	70	1	3	6	autotransporter outer membrane beta-barrel domain-containing protein, partial [Xanthomonadaceae bacterium]	tig00000113_pilon_C.paspali	1819805	1820182
g10053.t1	Y(0.922)	Y(0.55)	Cytoplasmic/apoplasticeffector	ref|WP_081504209.1|	125	1186	29	117	89	64	0	0	1.8	autotransporter domain-containing protein [Sphingomonas sp. PAMC 26621]	tig00000113_pilon_C.paspali	1819805	1820182
g10109.t1	Y(0.934)	-	Cytoplasmiceffector	gb|PQE29154.1|	167	167	1	167	167	13	0	0	4.32e-113	scytalone dehydratase protein [Rutstroemia sp. NJR-2017a BBW]	tig00000113_pilon_C.paspali	1984082	1984724
g10109.t1	Y(0.934)	-	Cytoplasmiceffector	gb|TEY61227.1|	167	167	1	167	167	26	0	0	4.2e-102	hypothetical protein BOTCAL_0172g00030 [Botryotinia calthae]	tig00000113_pilon_C.paspali	1984082	1984724
g10109.t1	Y(0.934)	-	Cytoplasmiceffector	gb|TGO12637.1|	167	167	1	165	165	25	0	0	1.47e-102	hypothetical protein BTUL_0085g00500 [Botrytis tulipae]	tig00000113_pilon_C.paspali	1984082	1984724
g10109.t1	Y(0.934)	-	Cytoplasmiceffector	gb|TGO36640.1|	167	167	1	165	165	26	0	0	8.02e-102	hypothetical protein BHYA_0119g00300 [Botrytis hyacinthi]	tig00000113_pilon_C.paspali	1984082	1984724
g10109.t1	Y(0.934)	-	Cytoplasmiceffector	gb|TGO67824.1|	167	167	1	165	165	26	0	0	1.39e-101	hypothetical protein BOTNAR_0035g00330 [Botryotinia narcissicola]	tig00000113_pilon_C.paspali	1984082	1984724
g10109.t1	Y(0.934)	-	Cytoplasmiceffector	gb|TGO72859.1|	167	167	1	165	165	25	0	0	1.85e-102	hypothetical protein BELL_0412g00110 [Botrytis elliptica]	tig00000113_pilon_C.paspali	1984082	1984724
g10109.t1	Y(0.934)	-	Cytoplasmiceffector	gb|TGO89213.1|	167	167	1	165	165	24	0	0	5.47e-102	hypothetical protein BPOR_0120g00210 [Botrytis porri]	tig00000113_pilon_C.paspali	1984082	1984724
g10109.t1	Y(0.934)	-	Cytoplasmiceffector	gb|THV50971.1|	167	167	1	165	165	25	0	0	1.14e-102	hypothetical protein BGAL_0128g00060 [Botrytis galanthina]	tig00000113_pilon_C.paspali	1984082	1984724
g10109.t1	Y(0.934)	-	Cytoplasmiceffector	ref|XP_001585797.1|	167	203	1	165	165	27	0	0	1.08e-101	hypothetical protein SS1G_13314 [Sclerotinia sclerotiorum 1980 UF-70]	tig00000113_pilon_C.paspali	1984082	1984724
g10109.t1	Y(0.934)	-	Cytoplasmiceffector	ref|XP_024547967.1|	167	167	1	167	167	25	0	0	6.3e-103	Bcscd1 [Botrytis cinerea B05.10]	tig00000113_pilon_C.paspali	1984082	1984724
g10143.t1	Y(0.918)	-	Cytoplasmiceffector	gb|OLF12354.1|	80	146	8	68	61	38	1	1	0.97	pyridoxamine 5'-phosphate oxidase [Actinophytocola xinjiangensis]	tig00000113_pilon_C.paspali	2071125	2071367
g10143.t1	Y(0.918)	-	Cytoplasmiceffector	ref|WP_015655853.1|	80	154	8	68	62	39	1	1	2	hypothetical protein [Streptomyces davaonensis]	tig00000113_pilon_C.paspali	2071125	2071367
g10149.t1	Y(0.903)	-	Cytoplasmiceffector	gb|PYJ83269.1|	101	272	5	88	92	59	2	9	1	prolipoprotein diacylglyceryl transferase [Verrucomicrobia bacterium]	tig00000113_pilon_C.paspali	2087352	2087657
g10149.t1	Y(0.903)	-	Cytoplasmiceffector	gb|THH08246.1|	101	1924	6	89	86	56	2	4	1.5	hypothetical protein EW145_g2829 [Phellinidium pouzarii]	tig00000113_pilon_C.paspali	2087352	2087657
g10149.t1	Y(0.903)	-	Cytoplasmiceffector	ref|WP_055108270.1|	101	530	12	52	48	22	2	7	9.8	hypothetical protein [Paenibacillus ihumii]	tig00000113_pilon_C.paspali	2087352	2087657
g10149.t1	Y(0.903)	-	Cytoplasmiceffector	ref|XP_025359847.1|	101	351	3	101	110	56	5	19	3.8	cysteine synthase [Jaminaea rosea]	tig00000113_pilon_C.paspali	2087352	2087657
g10161.t1	Y(0.957)	-	Cytoplasmiceffector	gb|PQE14229.1|	154	263	2	153	153	26	1	1	2.39e-86	hypothetical protein CJF31_00006770 [Rutstroemia sp. NJR-2017a BVV2]	tig00000113_pilon_C.paspali	2119759	2120349
g10161.t1	Y(0.957)	-	Cytoplasmiceffector	gb|PQE29227.1|	154	299	2	153	153	29	1	1	6.23e-86	hypothetical protein CJF30_00004263 [Rutstroemia sp. NJR-2017a BBW]	tig00000113_pilon_C.paspali	2119759	2120349
g10161.t1	Y(0.957)	-	Cytoplasmiceffector	gb|PQE31259.1|	154	755	2	153	153	27	1	1	2.23e-82	hypothetical protein CJF32_00001826 [Rutstroemia sp. NJR-2017a WRK4]	tig00000113_pilon_C.paspali	2119759	2120349
g10161.t1	Y(0.957)	-	Cytoplasmiceffector	gb|TEY43614.1|	154	779	1	154	159	57	3	10	5.33e-49	hypothetical protein BOTCAL_0367g00020 [Botryotinia calthae]	tig00000113_pilon_C.paspali	2119759	2120349
g10161.t1	Y(0.957)	-	Cytoplasmiceffector	gb|TGO11855.1|	154	793	1	154	159	56	4	15	8.4e-45	hypothetical protein BTUL_0100g00340 [Botrytis tulipae]	tig00000113_pilon_C.paspali	2119759	2120349
g10161.t1	Y(0.957)	-	Cytoplasmiceffector	gb|TGO23021.1|	154	778	1	154	159	59	3	10	1.06e-47	hypothetical protein BPAE_0147g00250 [Botrytis paeoniae]	tig00000113_pilon_C.paspali	2119759	2120349
g10161.t1	Y(0.957)	-	Cytoplasmiceffector	gb|TGO40534.1|	154	779	1	154	159	60	3	10	2.28e-46	hypothetical protein BHYA_0035g00080 [Botrytis hyacinthi]	tig00000113_pilon_C.paspali	2119759	2120349
g10161.t1	Y(0.957)	-	Cytoplasmiceffector	gb|TGO55284.1|	154	778	1	154	159	59	3	10	1.01e-48	hypothetical protein BCON_0094g00340 [Botryotinia convoluta]	tig00000113_pilon_C.paspali	2119759	2120349
g10161.t1	Y(0.957)	-	Cytoplasmiceffector	gb|THV55436.1|	154	779	1	154	159	61	3	10	4.23e-45	hypothetical protein BGAL_0008g00200 [Botrytis galanthina]	tig00000113_pilon_C.paspali	2119759	2120349
g10161.t1	Y(0.957)	-	Cytoplasmiceffector	ref|XP_024548028.1|	154	778	1	154	159	62	3	10	9.73e-45	hypothetical protein BCIN_03g09010 [Botrytis cinerea B05.10]	tig00000113_pilon_C.paspali	2119759	2120349
g10263.t1	Y(0.903)	-	Cytoplasmiceffector	gb|EMR69473.1|	78	93	1	78	78	17	0	0	7.93e-36	putative nedd8-like protein [Eutypa lata UCREL1]	tig00000113_pilon_C.paspali	2390226	2390761
g10263.t1	Y(0.903)	-	Cytoplasmiceffector	gb|OAL43904.1|	78	77	1	76	76	15	0	0	2.07e-35	ubiquitin [Pyrenochaeta sp. DS3sAY3a]	tig00000113_pilon_C.paspali	2390226	2390761
g10263.t1	Y(0.903)	-	Cytoplasmiceffector	gb|OCL04075.1|	78	78	1	78	78	16	0	0	9.47e-36	ubiquitin [Glonium stellatum]	tig00000113_pilon_C.paspali	2390226	2390761
g10263.t1	Y(0.903)	-	Cytoplasmiceffector	gb|PVI00079.1|	78	78	1	76	76	15	0	0	1.57e-35	ubiquitin [Periconia macrospinosa]	tig00000113_pilon_C.paspali	2390226	2390761
g10263.t1	Y(0.903)	-	Cytoplasmiceffector	gb|RYP68890.1|	78	94	1	77	77	16	0	0	2.67e-35	hypothetical protein DL769_005407 [Monosporascus sp. CRB-8-3]	tig00000113_pilon_C.paspali	2390226	2390761
g10263.t1	Y(0.903)	-	Cytoplasmiceffector	ref|XP_001799914.1|	78	77	1	76	76	15	0	0	2.98e-35	hypothetical protein SNOG_09625 [Parastagonospora nodorum SN15]	tig00000113_pilon_C.paspali	2390226	2390761
g10263.t1	Y(0.903)	-	Cytoplasmiceffector	ref|XP_001941854.1|	78	77	1	76	76	15	0	0	1.31e-35	neural precursor cell expressed [Pyrenophora tritici-repentis Pt-1C-BFP]	tig00000113_pilon_C.paspali	2390226	2390761
g10263.t1	Y(0.903)	-	Cytoplasmiceffector	ref|XP_003839473.1|	78	77	1	76	76	15	0	0	2.07e-35	similar to NEDD8 precursor [Leptosphaeria maculans JN3]	tig00000113_pilon_C.paspali	2390226	2390761
g10263.t1	Y(0.903)	-	Cytoplasmiceffector	ref|XP_007677320.1|	78	79	1	76	76	16	0	0	2.68e-35	hypothetical protein BAUCODRAFT_517664 [Baudoinia panamericana UAMH 10762]	tig00000113_pilon_C.paspali	2390226	2390761
g10263.t1	Y(0.903)	-	Cytoplasmiceffector	ref|XP_008029018.1|	78	77	1	76	76	16	0	0	4.1e-35	hypothetical protein SETTUDRAFT_164692 [Exserohilum turcica Et28A]	tig00000113_pilon_C.paspali	2390226	2390761
g10270.t1	Y(0.951)	-	Cytoplasmiceffector	ref|WP_051908616.1|	203	2800	50	135	89	54	3	9	7.6	non-ribosomal peptide synthetase [Candidatus Paracaedibacter acanthamoebae]	tig00000113_pilon_C.paspali	2405264	2405875
g10285.t1	Y(0.907)	-	Cytoplasmiceffector	emb|CCD52802.1|	114	209	4	114	115	55	1	4	2.28e-25	hypothetical protein BofuT4_P002490.1 [Botrytis cinerea T4]	tig00000113_pilon_C.paspali	2451569	2451913
g10285.t1	Y(0.907)	-	Cytoplasmiceffector	gb|TEY29392.1|	114	1017	2	114	117	50	1	4	1.29e-27	hypothetical protein BOTCAL_0943g00020 [Botryotinia calthae]	tig00000113_pilon_C.paspali	2451569	2451913
g10285.t1	Y(0.907)	-	Cytoplasmiceffector	gb|TGO13176.1|	114	1072	2	114	114	51	2	2	8.12e-23	hypothetical protein BTUL_0075g00210 [Botrytis tulipae]	tig00000113_pilon_C.paspali	2451569	2451913
g10285.t1	Y(0.907)	-	Cytoplasmiceffector	gb|TGO19892.1|	114	854	2	114	113	60	1	2	2.58e-19	hypothetical protein BTUL_0002g01410 [Botrytis tulipae]	tig00000113_pilon_C.paspali	2451569	2451913
g10285.t1	Y(0.907)	-	Cytoplasmiceffector	gb|TGO38906.1|	114	1072	2	114	114	53	2	2	4.29e-24	hypothetical protein BHYA_0064g00020 [Botrytis hyacinthi]	tig00000113_pilon_C.paspali	2451569	2451913
g10285.t1	Y(0.907)	-	Cytoplasmiceffector	gb|TGO54330.1|	114	1072	2	114	114	53	2	2	3.63e-23	hypothetical protein BOTNAR_0271g00020 [Botryotinia narcissicola]	tig00000113_pilon_C.paspali	2451569	2451913
g10285.t1	Y(0.907)	-	Cytoplasmiceffector	gb|TGO61488.1|	114	974	2	114	113	61	1	2	7.09e-20	hypothetical protein BCON_0027g00480 [Botryotinia convoluta]	tig00000113_pilon_C.paspali	2451569	2451913
g10285.t1	Y(0.907)	-	Cytoplasmiceffector	gb|THV48643.1|	114	1072	2	114	113	56	0	0	4.68e-24	hypothetical protein BGAL_0236g00130 [Botrytis galanthina]	tig00000113_pilon_C.paspali	2451569	2451913
g10285.t1	Y(0.907)	-	Cytoplasmiceffector	gb|THV53501.1|	114	1638	2	114	113	59	1	2	1.12e-19	hypothetical protein BGAL_0049g00360 [Botrytis galanthina]	tig00000113_pilon_C.paspali	2451569	2451913
g10285.t1	Y(0.907)	-	Cytoplasmiceffector	ref|XP_016265627.1|	114	1078	2	114	117	64	2	6	4.13e-17	hypothetical protein PV06_03805 [Exophiala oligosperma]	tig00000113_pilon_C.paspali	2451569	2451913
g10319.t1	Y(0.917)	-	Cytoplasmiceffector	emb|CCD50405.1|	194	190	5	194	190	21	0	0	3.19e-122	similar to coatomer subunit zeta-1 [Botrytis cinerea T4]	tig00000113_pilon_C.paspali	2544149	2544863
g10319.t1	Y(0.917)	-	Cytoplasmiceffector	emb|CZT02976.1|	194	199	1	194	199	22	2	5	1.93e-121	coatomer zeta subunit [Rhynchosporium commune]	tig00000113_pilon_C.paspali	2544149	2544863
g10319.t1	Y(0.917)	-	Cytoplasmiceffector	gb|ESZ99157.1|	194	194	1	194	194	23	0	0	3.83e-125	coatomer zeta subunit [Sclerotinia borealis F-4128]	tig00000113_pilon_C.paspali	2544149	2544863
g10319.t1	Y(0.917)	-	Cytoplasmiceffector	gb|OWP06703.1|	194	201	1	194	201	21	1	7	3.91e-122	coatomer zeta subunit [Marssonina coronariae]	tig00000113_pilon_C.paspali	2544149	2544863
g10319.t1	Y(0.917)	-	Cytoplasmiceffector	gb|PQE15547.1|	194	194	1	194	194	5	0	0	3.37e-138	Clathrin adaptor complex small chain protein [Rutstroemia sp. NJR-2017a WRK4]	tig00000113_pilon_C.paspali	2544149	2544863
g10319.t1	Y(0.917)	-	Cytoplasmiceffector	gb|PQE18742.1|	194	199	1	194	199	6	1	5	3.32e-135	Clathrin adaptor complex small chain protein [Rutstroemia sp. NJR-2017a BBW]	tig00000113_pilon_C.paspali	2544149	2544863
g10319.t1	Y(0.917)	-	Cytoplasmiceffector	gb|TEY77411.1|	194	194	1	194	194	22	0	0	1.82e-124	hypothetical protein BOTCAL_0055g00190 [Botryotinia calthae]	tig00000113_pilon_C.paspali	2544149	2544863
g10319.t1	Y(0.917)	-	Cytoplasmiceffector	gb|TGO16191.1|	194	194	1	194	194	22	0	0	6.21e-125	hypothetical protein BTUL_0031g00570 [Botrytis tulipae]	tig00000113_pilon_C.paspali	2544149	2544863
g10319.t1	Y(0.917)	-	Cytoplasmiceffector	gb|TGO25434.1|	194	194	1	194	194	22	0	0	6.01e-125	hypothetical protein BPAE_0080g00250 [Botrytis paeoniae]	tig00000113_pilon_C.paspali	2544149	2544863
g10319.t1	Y(0.917)	-	Cytoplasmiceffector	ref|XP_001549104.2|	194	194	1	194	194	21	0	0	9.73e-126	Bcret3 [Botrytis cinerea B05.10]	tig00000113_pilon_C.paspali	2544149	2544863
g10327.t1	Y(0.902)	-	Cytoplasmiceffector	emb|CZR50169.1|	136	314	30	126	103	65	2	12	3.3	uncharacterized protein PAC_00041 [Phialocephala subalpina]	tig00000113_pilon_C.paspali	2566193	2566603
g10327.t1	Y(0.902)	-	Cytoplasmiceffector	emb|CZR50182.1|	136	522	9	125	119	80	2	3	0.003	uncharacterized protein PAC_00054 [Phialocephala subalpina]	tig00000113_pilon_C.paspali	2566193	2566603
g10327.t1	Y(0.902)	-	Cytoplasmiceffector	gb|TGJ63478.1|	136	1402	35	131	97	62	1	5	0.15	hypothetical protein EYR41_011404 [Arthrobotrys oligospora]	tig00000113_pilon_C.paspali	2566193	2566603
g10327.t1	Y(0.902)	-	Cytoplasmiceffector	ref|WP_117870119.1|	136	350	18	135	138	79	5	21	0.76	AraC family transcriptional regulator [Ruegeria sp. AD91A]	tig00000113_pilon_C.paspali	2566193	2566603
g10327.t1	Y(0.902)	-	Cytoplasmiceffector	ref|XP_011118706.1|	136	1404	35	131	97	63	1	5	2.1	hypothetical protein AOL_s00007g503 [Arthrobotrys oligospora ATCC 24927]	tig00000113_pilon_C.paspali	2566193	2566603
g10327.t1	Y(0.902)	-	Cytoplasmiceffector	tpg|HCP60840.1|	136	108	40	116	77	39	3	10	0.76	thioredoxin [Dehalococcoidia bacterium]	tig00000113_pilon_C.paspali	2566193	2566603
g10329.t1	Y(0.953)	-	Cytoplasmiceffector	dbj|GBE29933.1|	99	155	30	93	66	43	1	2	0.12	hypothetical protein BMS3Bbin04_00957 [bacterium BMS3Bbin04]	tig00000113_pilon_C.paspali	2569962	2570261
g10329.t1	Y(0.953)	-	Cytoplasmiceffector	gb|TDL13231.1|	99	442	23	87	69	42	2	4	2.9	hypothetical protein BD410DRAFT_810733, partial [Rickenella mellea]	tig00000113_pilon_C.paspali	2569962	2570261
g10329.t1	Y(0.953)	-	Cytoplasmiceffector	ref|WP_051920327.1|	99	184	6	86	81	49	1	5	9.6	DUF4065 domain-containing protein [Bifidobacterium kashiwanohense]	tig00000113_pilon_C.paspali	2569962	2570261
g10439.t1	Y(0.94)	-	Cytoplasmiceffector	gb|PQE07398.1|	274	274	1	274	274	24	0	0	0	nuclear Qri2 Nse4 protein [Rutstroemia sp. NJR-2017a WRK4]	tig00000120_pilon_C.paspali	108773	109663
g10439.t1	Y(0.94)	-	Cytoplasmiceffector	gb|PQE21215.1|	274	274	1	274	274	23	0	0	0	nuclear Qri2 Nse4 protein [Rutstroemia sp. NJR-2017a BVV2]	tig00000120_pilon_C.paspali	108773	109663
g10439.t1	Y(0.94)	-	Cytoplasmiceffector	gb|PQE28456.1|	274	261	14	274	261	22	0	0	1.21e-180	nuclear Qri2 Nse4 protein [Rutstroemia sp. NJR-2017a BBW]	tig00000120_pilon_C.paspali	108773	109663
g10439.t1	Y(0.94)	-	Cytoplasmiceffector	gb|TGO17843.1|	274	276	1	274	274	51	0	0	6e-174	hypothetical protein BTUL_0014g00380 [Botrytis tulipae]	tig00000120_pilon_C.paspali	108773	109663
g10439.t1	Y(0.94)	-	Cytoplasmiceffector	gb|TGO43460.1|	274	276	1	274	274	52	0	0	7.72e-174	hypothetical protein BHYA_0001g00910 [Botrytis hyacinthi]	tig00000120_pilon_C.paspali	108773	109663
g10439.t1	Y(0.94)	-	Cytoplasmiceffector	gb|TGO59010.1|	274	276	1	274	274	50	0	0	2.42e-174	hypothetical protein BOTNAR_0171g00130 [Botryotinia narcissicola]	tig00000120_pilon_C.paspali	108773	109663
g10439.t1	Y(0.94)	-	Cytoplasmiceffector	gb|TGO64047.1|	274	276	1	274	274	50	0	0	1.72e-174	hypothetical protein BCON_0009g00560 [Botryotinia convoluta]	tig00000120_pilon_C.paspali	108773	109663
g10439.t1	Y(0.94)	-	Cytoplasmiceffector	gb|TGO76975.1|	274	276	1	274	274	50	0	0	6.92e-175	hypothetical protein BELL_0128g00010 [Botrytis elliptica]	tig00000120_pilon_C.paspali	108773	109663
g10439.t1	Y(0.94)	-	Cytoplasmiceffector	gb|TGO89518.1|	274	276	1	274	274	51	0	0	8.07e-174	hypothetical protein BPOR_0105g00020 [Botrytis porri]	tig00000120_pilon_C.paspali	108773	109663
g10439.t1	Y(0.94)	-	Cytoplasmiceffector	gb|THV52799.1|	274	276	1	273	273	49	0	0	9.31e-175	hypothetical protein BGAL_0068g00200 [Botrytis galanthina]	tig00000120_pilon_C.paspali	108773	109663
g10458.t1	Y(0.924)	-	Cytoplasmiceffector	gb|KIM97008.1|	181	178	1	177	177	31	0	0	1.82e-108	hypothetical protein OIDMADRAFT_58553 [Oidiodendron maius Zn]	tig00000122_pilon_C.paspali	246533	247210
g10458.t1	Y(0.924)	-	Cytoplasmiceffector	gb|KUL82141.1|	181	183	5	180	177	55	1	1	8.93e-87	hypothetical protein ZTR_10695 [Talaromyces verruculosus]	tig00000122_pilon_C.paspali	246533	247210
g10458.t1	Y(0.924)	-	Cytoplasmiceffector	gb|PQE05315.1|	181	189	1	181	181	6	0	0	2.21e-129	Cupin domain-containing protein [Rutstroemia sp. NJR-2017a BVV2]	tig00000122_pilon_C.paspali	246533	247210
g10458.t1	Y(0.924)	-	Cytoplasmiceffector	gb|PQE31151.1|	181	188	1	181	181	5	0	0	9.59e-130	Cupin domain-containing protein [Rutstroemia sp. NJR-2017a WRK4]	tig00000122_pilon_C.paspali	246533	247210
g10458.t1	Y(0.924)	-	Cytoplasmiceffector	gb|PVH92620.1|	181	179	1	177	177	16	0	0	7.44e-118	hypothetical protein DM02DRAFT_699101 [Periconia macrospinosa]	tig00000122_pilon_C.paspali	246533	247210
g10458.t1	Y(0.924)	-	Cytoplasmiceffector	gb|RMJ14360.1|	181	181	5	175	171	54	0	0	4.21e-85	hypothetical protein CDV36_005978 [Fusarium kuroshium]	tig00000122_pilon_C.paspali	246533	247210
g10458.t1	Y(0.924)	-	Cytoplasmiceffector	gb|RSL71866.1|	181	181	5	175	171	54	0	0	1.75e-85	hypothetical protein CEP54_001015 [Fusarium sp. AF-8]	tig00000122_pilon_C.paspali	246533	247210
g10458.t1	Y(0.924)	-	Cytoplasmiceffector	gb|TKA59798.1|	181	185	5	171	167	47	0	0	5.78e-88	hypothetical protein B0A55_11087 [Friedmanniomyces simplex]	tig00000122_pilon_C.paspali	246533	247210
g10458.t1	Y(0.924)	-	Cytoplasmiceffector	ref|XP_001798588.1|	181	179	1	179	179	23	0	0	3.91e-115	hypothetical protein SNOG_08269 [Parastagonospora nodorum SN15]	tig00000122_pilon_C.paspali	246533	247210
g10458.t1	Y(0.924)	-	Cytoplasmiceffector	ref|XP_002483093.1|	181	183	5	173	169	47	0	0	8.74e-87	conserved hypothetical protein [Talaromyces stipitatus ATCC 10500]	tig00000122_pilon_C.paspali	246533	247210
g10461.t1	Y(0.909)	-	Cytoplasmiceffector	ref|WP_021646877.1|	79	895	4	73	76	41	2	8	1.6	hypothetical protein [Bacteroides pyogenes]	tig00000122_pilon_C.paspali	251356	251595
g10461.t1	Y(0.909)	-	Cytoplasmiceffector	ref|WP_027325548.1|	79	895	4	73	76	41	2	8	1.5	hypothetical protein [Bacteroides pyogenes]	tig00000122_pilon_C.paspali	251356	251595
g10479.t1	Y(0.921)	-	Cytoplasmiceffector	gb|ESZ94258.1|	136	136	1	136	136	11	0	0	9.9e-76	prefoldin subunit 4 [Sclerotinia borealis F-4128]	tig00000122_pilon_C.paspali	289166	289764
g10479.t1	Y(0.921)	-	Cytoplasmiceffector	gb|PQE05331.1|	136	142	6	136	131	3	0	0	2.07e-82	prefoldin subunit 4 protein [Rutstroemia sp. NJR-2017a BVV2]	tig00000122_pilon_C.paspali	289166	289764
g10479.t1	Y(0.921)	-	Cytoplasmiceffector	gb|PQE06773.1|	136	136	1	136	136	5	0	0	4.47e-86	prefoldin subunit 4 protein [Rutstroemia sp. NJR-2017a BBW]	tig00000122_pilon_C.paspali	289166	289764
g10479.t1	Y(0.921)	-	Cytoplasmiceffector	gb|PQE31150.1|	136	136	1	136	136	3	0	0	4.77e-87	prefoldin subunit 4 protein [Rutstroemia sp. NJR-2017a WRK4]	tig00000122_pilon_C.paspali	289166	289764
g10479.t1	Y(0.921)	-	Cytoplasmiceffector	gb|TGO14978.1|	136	136	1	136	136	11	0	0	1.12e-81	hypothetical protein BTUL_0046g00700 [Botrytis tulipae]	tig00000122_pilon_C.paspali	289166	289764
g10479.t1	Y(0.921)	-	Cytoplasmiceffector	gb|TGO37610.1|	136	167	1	136	136	13	0	0	7.88e-80	hypothetical protein BHYA_0093g00360 [Botrytis hyacinthi]	tig00000122_pilon_C.paspali	289166	289764
g10479.t1	Y(0.921)	-	Cytoplasmiceffector	gb|TGO44046.1|	136	136	1	136	136	14	0	0	8.01e-79	hypothetical protein BCON_0628g00040 [Botryotinia convoluta]	tig00000122_pilon_C.paspali	289166	289764
g10479.t1	Y(0.921)	-	Cytoplasmiceffector	gb|TGO83538.1|	136	136	1	136	136	11	0	0	5.62e-81	hypothetical protein BPOR_0630g00070 [Botrytis porri]	tig00000122_pilon_C.paspali	289166	289764
g10479.t1	Y(0.921)	-	Cytoplasmiceffector	gb|THV48364.1|	136	190	6	136	131	11	0	0	3.82e-77	hypothetical protein BGAL_0253g00130 [Botrytis galanthina]	tig00000122_pilon_C.paspali	289166	289764
g10479.t1	Y(0.921)	-	Cytoplasmiceffector	ref|XP_001588508.1|	136	136	1	136	136	8	0	0	1.47e-82	hypothetical protein SS1G_10055 [Sclerotinia sclerotiorum 1980 UF-70]	tig00000122_pilon_C.paspali	289166	289764
g10531.t1	Y(0.925)	-	Cytoplasmiceffector	ref|XP_001080815.1|	96	2234	23	96	74	51	1	1	1.7	PREDICTED: protein KIAA0100 homolog [Rattus norvegicus]	tig00000122_pilon_C.paspali	414461	414822
g10531.t1	Y(0.925)	-	Cytoplasmiceffector	ref|XP_004706981.1|	96	2092	23	96	74	51	1	1	1.9	PREDICTED: protein KIAA0100 homolog [Echinops telfairi]	tig00000122_pilon_C.paspali	414461	414822
g10531.t1	Y(0.925)	-	Cytoplasmiceffector	ref|XP_008064892.1|	96	2235	23	96	74	51	1	1	2.1	protein KIAA0100 homolog isoform X1 [Carlito syrichta]	tig00000122_pilon_C.paspali	414461	414822
g10531.t1	Y(0.925)	-	Cytoplasmiceffector	ref|XP_012784879.1|	96	2150	23	96	74	50	1	1	0.87	PREDICTED: protein KIAA0100 homolog [Ochotona princeps]	tig00000122_pilon_C.paspali	414461	414822
g10531.t1	Y(0.925)	-	Cytoplasmiceffector	ref|XP_014645257.1|	96	2025	23	96	74	51	1	1	2.3	PREDICTED: protein KIAA0100 homolog isoform X3 [Ceratotherium simum simum]	tig00000122_pilon_C.paspali	414461	414822
g10531.t1	Y(0.925)	-	Cytoplasmiceffector	ref|XP_016047018.1|	96	1887	23	96	74	51	1	1	2.2	PREDICTED: protein KIAA0100 homolog [Erinaceus europaeus]	tig00000122_pilon_C.paspali	414461	414822
g10531.t1	Y(0.925)	-	Cytoplasmiceffector	ref|XP_021572583.1|	96	2234	23	96	74	51	1	1	2.1	protein KIAA0100 homolog isoform X2 [Carlito syrichta]	tig00000122_pilon_C.paspali	414461	414822
g10531.t1	Y(0.925)	-	Cytoplasmiceffector	ref|XP_023411892.1|	96	1610	23	96	74	51	1	1	1.9	protein KIAA0100 homolog [Loxodonta africana]	tig00000122_pilon_C.paspali	414461	414822
g10531.t1	Y(0.925)	-	Cytoplasmiceffector	ref|XP_023441381.1|	96	2234	23	96	74	50	1	1	2	protein KIAA0100 homolog isoform X1 [Dasypus novemcinctus]	tig00000122_pilon_C.paspali	414461	414822
g10531.t1	Y(0.925)	-	Cytoplasmiceffector	ref|XP_023441388.1|	96	2232	23	96	74	50	1	1	2	protein KIAA0100 homolog isoform X2 [Dasypus novemcinctus]	tig00000122_pilon_C.paspali	414461	414822
g10532.t1	Y(0.918)	-	Cytoplasmiceffector	gb|OWY95652.1|	105	230	21	103	83	46	2	10	1	Pol Polyprotein [Phytophthora megakarya]	tig00000122_pilon_C.paspali	416608	416925
g10532.t1	Y(0.918)	-	Cytoplasmiceffector	ref|WP_134322605.1|	105	339	12	56	45	25	0	0	3.6	helix-turn-helix domain-containing protein [Cumulibacter sp. G-1]	tig00000122_pilon_C.paspali	416608	416925
g10532.t1	Y(0.918)	-	Cytoplasmiceffector	ref|XP_028680294.1|	105	1471	5	61	59	37	1	2	5.1	membrane-associated guanylate kinase, WW and PDZ domain-containing protein 1 isoform X5 [Erpetoichthys calabaricus]	tig00000122_pilon_C.paspali	416608	416925
g10554.t1	Y(0.99)	Y(0.55)	Cytoplasmic/apoplasticeffector	emb|SCN92126.1|	101	579	6	86	81	40	2	7	2.04e-09	uncharacterized protein FFE2_07284 [Fusarium fujikuroi]	tig00000134_pilon_C.paspali	24966	25271
g10554.t1	Y(0.99)	Y(0.55)	Cytoplasmic/apoplasticeffector	emb|SCO43052.1|	101	579	6	86	81	40	2	7	2.16e-09	uncharacterized protein FFMR_07188 [Fusarium fujikuroi]	tig00000134_pilon_C.paspali	24966	25271
g10554.t1	Y(0.99)	Y(0.55)	Cytoplasmic/apoplasticeffector	emb|SCV31924.1|	101	579	6	86	81	40	2	7	2.12e-09	uncharacterized protein FFFS_03046 [Fusarium fujikuroi]	tig00000134_pilon_C.paspali	24966	25271
g10554.t1	Y(0.99)	Y(0.55)	Cytoplasmic/apoplasticeffector	emb|SCV51664.1|	101	579	6	86	81	40	2	7	2.08e-09	uncharacterized protein FFB14_12133 [Fusarium fujikuroi]	tig00000134_pilon_C.paspali	24966	25271
g10554.t1	Y(0.99)	Y(0.55)	Cytoplasmic/apoplasticeffector	gb|KLO82168.1|	101	579	6	86	81	40	2	7	2.22e-09	Uncharacterized protein LW93_9350 [Fusarium fujikuroi]	tig00000134_pilon_C.paspali	24966	25271
g10554.t1	Y(0.99)	Y(0.55)	Cytoplasmic/apoplasticeffector	gb|KLP05068.1|	101	579	6	86	81	40	2	7	2.02e-09	Uncharacterized protein LW94_14145 [Fusarium fujikuroi]	tig00000134_pilon_C.paspali	24966	25271
g10554.t1	Y(0.99)	Y(0.55)	Cytoplasmic/apoplasticeffector	gb|OCL02910.1|	101	564	6	100	97	52	5	7	1.02e-09	hypothetical protein AOQ84DRAFT_357151 [Glonium stellatum]	tig00000134_pilon_C.paspali	24966	25271
g10554.t1	Y(0.99)	Y(0.55)	Cytoplasmic/apoplasticeffector	gb|RSL93648.1|	101	519	6	93	88	42	3	9	2.31e-09	hypothetical protein CEP52_013137 [Fusarium sp. AF-4]	tig00000134_pilon_C.paspali	24966	25271
g10554.t1	Y(0.99)	Y(0.55)	Cytoplasmic/apoplasticeffector	gb|TAQ89927.1|	101	565	1	86	86	33	1	1	9.61e-24	hypothetical protein B7494_g1787 [Chlorociboria aeruginascens]	tig00000134_pilon_C.paspali	24966	25271
g10554.t1	Y(0.99)	Y(0.55)	Cytoplasmic/apoplasticeffector	ref|XP_018695550.1|	101	584	1	97	97	46	1	1	1.46e-20	hypothetical protein AYL99_04386 [Fonsecaea erecta]	tig00000134_pilon_C.paspali	24966	25271
g10597.t1	Y(0.918)	Y(0.612)	Cytoplasmic/apoplasticeffector	gb|EMR90364.1|	177	133	116	169	57	24	2	5	7.18e-07	hypothetical protein BcDW1_981 [Botrytis cinerea BcDW1]	tig00000134_pilon_C.paspali	153124	153711
g10597.t1	Y(0.918)	Y(0.612)	Cytoplasmic/apoplasticeffector	gb|TGO16927.1|	177	132	111	169	62	26	2	5	6.2e-08	hypothetical protein BTUL_0022g00280 [Botrytis tulipae]	tig00000134_pilon_C.paspali	153124	153711
g10597.t1	Y(0.918)	Y(0.612)	Cytoplasmic/apoplasticeffector	gb|TGO29249.1|	177	154	111	168	61	27	2	5	5.98e-07	hypothetical protein BPAE_0017g00570 [Botrytis paeoniae]	tig00000134_pilon_C.paspali	153124	153711
g10597.t1	Y(0.918)	Y(0.612)	Cytoplasmic/apoplasticeffector	gb|TGO35639.1|	177	133	111	169	62	27	2	5	1.49e-06	hypothetical protein BHYA_0151g00120 [Botrytis hyacinthi]	tig00000134_pilon_C.paspali	153124	153711
g10597.t1	Y(0.918)	Y(0.612)	Cytoplasmic/apoplasticeffector	gb|TGO62372.1|	177	139	111	169	62	28	2	5	6.92e-07	hypothetical protein BCON_0020g00450 [Botryotinia convoluta]	tig00000134_pilon_C.paspali	153124	153711
g10597.t1	Y(0.918)	Y(0.612)	Cytoplasmic/apoplasticeffector	gb|TGO64933.1|	177	133	111	169	62	26	2	5	3.08e-08	hypothetical protein BOTNAR_0083g00160 [Botryotinia narcissicola]	tig00000134_pilon_C.paspali	153124	153711
g10597.t1	Y(0.918)	Y(0.612)	Cytoplasmic/apoplasticeffector	gb|TGO79094.1|	177	132	111	169	62	26	2	5	2.32e-08	hypothetical protein BELL_0043g00030 [Botrytis elliptica]	tig00000134_pilon_C.paspali	153124	153711
g10597.t1	Y(0.918)	Y(0.612)	Cytoplasmic/apoplasticeffector	gb|THV54722.1|	177	134	111	169	65	22	3	11	8.28e-06	hypothetical protein BGAL_0021g00250 [Botrytis galanthina]	tig00000134_pilon_C.paspali	153124	153711
g10597.t1	Y(0.918)	Y(0.612)	Cytoplasmic/apoplasticeffector	ref|XP_001547507.1|	177	133	116	169	57	24	2	5	7.18e-07	hypothetical protein BCIN_13g00360 [Botrytis cinerea B05.10]	tig00000134_pilon_C.paspali	153124	153711
g10597.t1	Y(0.918)	Y(0.612)	Cytoplasmic/apoplasticeffector	ref|XP_001585453.1|	177	137	112	169	61	28	2	5	2.45e-05	predicted protein [Sclerotinia sclerotiorum 1980 UF-70]	tig00000134_pilon_C.paspali	153124	153711
g10645.t1	Y(0.991)	-	Cytoplasmiceffector	ref|WP_081783205.1|	88	739	9	79	75	41	4	7	2.1	1,4-alpha-glucan branching enzyme [Lachnospiraceae bacterium AC3007]	tig00000136_pilon_C.paspali	242206	242881
g10645.t1	Y(0.991)	-	Cytoplasmiceffector	ref|WP_122544343.1|	88	67	25	64	40	23	1	1	7.4	hypothetical protein [Pseudomonas sp. 286]	tig00000136_pilon_C.paspali	242206	242881
g10645.t1	Y(0.991)	-	Cytoplasmiceffector	ref|WP_129962278.1|	88	373	16	87	81	47	3	9	7.6	patatin-like phospholipase family protein [Paraburkholderia sp. UYCP14C]	tig00000136_pilon_C.paspali	242206	242881
g10657.t1	Y(0.925)	-	Cytoplasmiceffector	ref|WP_019464659.1|	97	1185	5	86	83	44	3	12	3.5	DNA polymerase III subunit alpha [Dyella japonica]	tig00000136_pilon_C.paspali	283301	283594
g10657.t1	Y(0.925)	-	Cytoplasmiceffector	ref|WP_025042846.1|	97	339	18	76	59	36	1	4	6.9	CoA transferase [Sulfitobacter geojensis]	tig00000136_pilon_C.paspali	283301	283594
g10657.t1	Y(0.925)	-	Cytoplasmiceffector	ref|WP_046972874.1|	97	1190	5	86	83	45	3	12	7.2	DNA polymerase III subunit alpha [Dyella japonica]	tig00000136_pilon_C.paspali	283301	283594
g10657.t1	Y(0.925)	-	Cytoplasmiceffector	ref|WP_074547461.1|	97	1179	5	86	83	43	3	12	0.94	DNA polymerase III subunit alpha [Dyella sp. AtDHG13]	tig00000136_pilon_C.paspali	283301	283594
g10657.t1	Y(0.925)	-	Cytoplasmiceffector	ref|WP_102303913.1|	97	1189	5	86	83	44	3	12	2.8	DNA polymerase III subunit alpha [Dyella sp. AD56]	tig00000136_pilon_C.paspali	283301	283594
g10657.t1	Y(0.925)	-	Cytoplasmiceffector	ref|WP_104505935.1|	97	113	1	81	81	50	2	7	7.1	hypothetical protein [Rhodoblastus sphagnicola]	tig00000136_pilon_C.paspali	283301	283594
g10657.t1	Y(0.925)	-	Cytoplasmiceffector	ref|WP_109126784.1|	97	1190	5	86	83	43	3	12	2.6	DNA polymerase III subunit alpha [Dyella sp. C11]	tig00000136_pilon_C.paspali	283301	283594
g10657.t1	Y(0.925)	-	Cytoplasmiceffector	ref|WP_121881619.1|	97	1196	5	86	83	45	3	12	8.7	DNA polymerase III subunit alpha [Dyella sp. YR388]	tig00000136_pilon_C.paspali	283301	283594
g10657.t1	Y(0.925)	-	Cytoplasmiceffector	ref|WP_131149556.1|	97	1178	5	86	83	45	3	12	8.2	MULTISPECIES: DNA polymerase III subunit alpha [Dyella]	tig00000136_pilon_C.paspali	283301	283594
g10659.t1	Y(0.919)	Y(0.522)	Cytoplasmic/apoplasticeffector	gb|PQE08348.1|	158	158	1	158	158	14	0	0	2.15e-104	extracellular guanyl-specific ribonuclease protein [Rutstroemia sp. NJR-2017a WRK4]	tig00000136_pilon_C.paspali	284637	285241
g10659.t1	Y(0.919)	Y(0.522)	Cytoplasmic/apoplasticeffector	gb|PQE14072.1|	158	158	1	158	158	13	0	0	1.75e-104	extracellular guanyl-specific ribonuclease protein [Rutstroemia sp. NJR-2017a BBW]	tig00000136_pilon_C.paspali	284637	285241
g10659.t1	Y(0.919)	Y(0.522)	Cytoplasmic/apoplasticeffector	gb|RAL64158.1|	158	154	1	158	162	30	4	12	6.54e-76	hypothetical protein DID88_002051 [Monilinia fructigena]	tig00000136_pilon_C.paspali	284637	285241
g10659.t1	Y(0.919)	Y(0.522)	Cytoplasmic/apoplasticeffector	gb|TGO13597.1|	158	154	1	158	162	30	4	12	6.99e-78	hypothetical protein BTUL_0067g00400 [Botrytis tulipae]	tig00000136_pilon_C.paspali	284637	285241
g10659.t1	Y(0.919)	Y(0.522)	Cytoplasmic/apoplasticeffector	gb|TGO24009.1|	158	154	1	158	162	32	4	12	3.31e-76	hypothetical protein BPAE_0114g00030 [Botrytis paeoniae]	tig00000136_pilon_C.paspali	284637	285241
g10659.t1	Y(0.919)	Y(0.522)	Cytoplasmic/apoplasticeffector	gb|TGO39012.1|	158	154	1	158	162	29	4	12	5.55e-78	hypothetical protein BHYA_0062g00150 [Botrytis hyacinthi]	tig00000136_pilon_C.paspali	284637	285241
g10659.t1	Y(0.919)	Y(0.522)	Cytoplasmic/apoplasticeffector	gb|TGO64851.1|	158	154	1	158	162	31	4	12	3.7e-77	hypothetical protein BCON_0005g00490 [Botryotinia convoluta]	tig00000136_pilon_C.paspali	284637	285241
g10659.t1	Y(0.919)	Y(0.522)	Cytoplasmic/apoplasticeffector	gb|TGO65138.1|	158	154	1	158	162	31	4	12	1.41e-76	hypothetical protein BOTNAR_0081g00130 [Botryotinia narcissicola]	tig00000136_pilon_C.paspali	284637	285241
g10659.t1	Y(0.919)	Y(0.522)	Cytoplasmic/apoplasticeffector	gb|TGO75851.1|	158	154	1	158	162	30	4	12	2.23e-77	hypothetical protein BELL_0189g00140 [Botrytis elliptica]	tig00000136_pilon_C.paspali	284637	285241
g10659.t1	Y(0.919)	Y(0.522)	Cytoplasmic/apoplasticeffector	gb|THV51485.1|	158	154	1	158	162	28	4	12	8.9e-79	hypothetical protein BGAL_0109g00120 [Botrytis galanthina]	tig00000136_pilon_C.paspali	284637	285241
g10711.t1	Y(0.907)	-	Cytoplasmiceffector	gb|OKZ76816.1|	173	426	49	135	87	56	1	5	0.084	hypothetical protein BHW01_06740 [Clostridium sp. 27_14]	tig00000136_pilon_C.paspali	458886	459407
g10711.t1	Y(0.907)	-	Cytoplasmiceffector	gb|RUX18799.1|	173	152	95	167	83	42	3	11	0.69	metalloprotease TldD, partial [Mesorhizobium sp. M2A.F.Ca.ET.037.01.1.1]	tig00000136_pilon_C.paspali	458886	459407
g10711.t1	Y(0.907)	-	Cytoplasmiceffector	gb|RUY10575.1|	173	226	95	167	83	42	3	11	0.85	TldD/PmbA family protein, partial [Mesorhizobium sp. M2A.F.Ca.ET.040.01.1.1]	tig00000136_pilon_C.paspali	458886	459407
g10711.t1	Y(0.907)	-	Cytoplasmiceffector	gb|RWE15689.1|	173	192	95	167	83	42	3	11	0.73	metalloprotease TldD, partial [Mesorhizobium sp.]	tig00000136_pilon_C.paspali	458886	459407
g10711.t1	Y(0.907)	-	Cytoplasmiceffector	gb|RWE81423.1|	173	193	95	167	83	42	3	11	0.71	metalloprotease TldD, partial [Mesorhizobium sp.]	tig00000136_pilon_C.paspali	458886	459407
g10711.t1	Y(0.907)	-	Cytoplasmiceffector	gb|RWE88102.1|	173	173	95	167	83	42	3	11	0.63	metalloprotease TldD, partial [Mesorhizobium sp.]	tig00000136_pilon_C.paspali	458886	459407
g10711.t1	Y(0.907)	-	Cytoplasmiceffector	gb|RWF51950.1|	173	143	95	167	83	42	3	11	0.68	metalloprotease TldD, partial [Mesorhizobium sp.]	tig00000136_pilon_C.paspali	458886	459407
g10711.t1	Y(0.907)	-	Cytoplasmiceffector	gb|RWX63682.1|	173	186	95	167	83	42	3	11	0.74	metalloprotease TldD, partial [Mesorhizobium sp. M2A.F.Ca.ET.039.01.1.1]	tig00000136_pilon_C.paspali	458886	459407
g10711.t1	Y(0.907)	-	Cytoplasmiceffector	gb|TIU55775.1|	173	190	95	167	83	42	3	11	0.64	metalloprotease TldD, partial [Mesorhizobium sp.]	tig00000136_pilon_C.paspali	458886	459407
g10711.t1	Y(0.907)	-	Cytoplasmiceffector	ref|WP_036657004.1|	173	177	28	71	44	27	0	0	0.14	hypothetical protein [Paenibacillus wynnii]	tig00000136_pilon_C.paspali	458886	459407
g10735.t1	Y(0.913)	-	Cytoplasmiceffector	gb|ESZ93229.1|	182	179	1	182	182	20	2	3	6.85e-92	50S ribosomal protein L12 [Sclerotinia borealis F-4128]	tig00000136_pilon_C.paspali	538179	538781
g10735.t1	Y(0.913)	-	Cytoplasmiceffector	gb|KIN07453.1|	182	182	1	182	183	36	2	2	2.95e-91	hypothetical protein OIDMADRAFT_108866 [Oidiodendron maius Zn]	tig00000136_pilon_C.paspali	538179	538781
g10735.t1	Y(0.913)	-	Cytoplasmiceffector	gb|PQE19104.1|	182	182	1	182	182	8	0	0	4.61e-105	54S ribosomal l12 protein [Rutstroemia sp. NJR-2017a BBW]	tig00000136_pilon_C.paspali	538179	538781
g10735.t1	Y(0.913)	-	Cytoplasmiceffector	gb|TGO09984.1|	182	180	1	182	182	18	1	2	3.95e-89	hypothetical protein BTUL_0148g00180 [Botrytis tulipae]	tig00000136_pilon_C.paspali	538179	538781
g10735.t1	Y(0.913)	-	Cytoplasmiceffector	gb|TGO26051.1|	182	180	1	182	182	19	1	2	1.42e-95	hypothetical protein BPAE_0067g00230 [Botrytis paeoniae]	tig00000136_pilon_C.paspali	538179	538781
g10735.t1	Y(0.913)	-	Cytoplasmiceffector	gb|TGO32672.1|	182	180	1	182	182	18	1	2	3.68e-96	hypothetical protein BHYA_0297g00040 [Botrytis hyacinthi]	tig00000136_pilon_C.paspali	538179	538781
g10735.t1	Y(0.913)	-	Cytoplasmiceffector	gb|TGO47102.1|	182	180	1	182	182	19	1	2	3.68e-96	hypothetical protein BOTNAR_0544g00020 [Botryotinia narcissicola]	tig00000136_pilon_C.paspali	538179	538781
g10735.t1	Y(0.913)	-	Cytoplasmiceffector	gb|TGO75618.1|	182	180	1	182	182	19	1	2	1.47e-95	hypothetical protein BELL_0202g00010 [Botrytis elliptica]	tig00000136_pilon_C.paspali	538179	538781
g10735.t1	Y(0.913)	-	Cytoplasmiceffector	gb|TGO85009.1|	182	180	1	182	182	18	1	2	7.03e-96	hypothetical protein BPOR_0441g00040 [Botrytis porri]	tig00000136_pilon_C.paspali	538179	538781
g10735.t1	Y(0.913)	-	Cytoplasmiceffector	ref|XP_001552110.1|	182	180	1	182	182	19	1	2	1.47e-95	Bcmnp1 [Botrytis cinerea B05.10]	tig00000136_pilon_C.paspali	538179	538781
g10800.t1	Y(0.955)	-	Cytoplasmiceffector	ref|XP_022805194.1|	96	1171	1	55	61	36	1	6	6.2	ubiquitin carboxyl-terminal hydrolase 47-like [Stylophora pistillata]	tig00000136_pilon_C.paspali	734198	734488
g10800.t1	Y(0.955)	-	Cytoplasmiceffector	ref|XP_027047222.1|	96	1172	1	55	61	36	1	6	8.8	ubiquitin carboxyl-terminal hydrolase 47-like [Pocillopora damicornis]	tig00000136_pilon_C.paspali	734198	734488
g10809.t1	Y(0.938)	-	Cytoplasmiceffector	emb|SCV68092.1|	86	205	27	71	47	28	1	2	5.9	BQ2448_213 [Microbotryum intermedium]	tig00000136_pilon_C.paspali	753646	753906
g10809.t1	Y(0.938)	-	Cytoplasmiceffector	gb|ORY90161.1|	86	200	27	71	47	27	1	2	1.7	emp24/gp25L/p24 family/GOLD-domain-containing protein [Leucosporidium creatinivorum]	tig00000136_pilon_C.paspali	753646	753906
g10809.t1	Y(0.938)	-	Cytoplasmiceffector	gb|PRQ77103.1|	86	199	27	71	47	28	1	2	6.1	emp24/gp25L/p24 family/GOLD-domain containing protein [Rhodotorula toruloides]	tig00000136_pilon_C.paspali	753646	753906
g10809.t1	Y(0.938)	-	Cytoplasmiceffector	gb|RZI84691.1|	86	289	8	74	67	47	1	3	8.3	MBL fold metallo-hydrolase [Rubrivivax sp.]	tig00000136_pilon_C.paspali	753646	753906
g10809.t1	Y(0.938)	-	Cytoplasmiceffector	ref|WP_018232504.1|	86	166	9	86	78	56	1	5	7.3	FixH family protein [Thioalkalivibrio thiocyanodenitrificans]	tig00000136_pilon_C.paspali	753646	753906
g10809.t1	Y(0.938)	-	Cytoplasmiceffector	ref|XP_016275864.1|	86	199	27	71	47	28	1	2	6.3	COPII-coated vesicle protein [Rhodotorula toruloides NP11]	tig00000136_pilon_C.paspali	753646	753906
g10839.t1	Y(0.904)	-	Cytoplasmiceffector	gb|RHY30591.1|	75	415	2	51	50	29	1	2	9.9	hypothetical protein DYB32_006893 [Aphanomyces invadans]	tig00000136_pilon_C.paspali	1089638	1089919
g10839.t1	Y(0.904)	-	Cytoplasmiceffector	tpg|HBC56210.1|	75	716	20	60	41	21	1	1	5.3	adenosylcobalamin-dependent ribonucleoside-diphosphate reductase [Gammaproteobacteria bacterium]	tig00000136_pilon_C.paspali	1089638	1089919
g10857.t1	Y(0.927)	-	Cytoplasmiceffector	gb|PMD43372.1|	96	96	1	93	93	21	0	0	1.5e-45	hypothetical protein L207DRAFT_423165 [Hyaloscypha variabilis F]	tig00000136_pilon_C.paspali	1133949	1134422
g10857.t1	Y(0.927)	-	Cytoplasmiceffector	gb|PQE11925.1|	96	125	7	96	90	7	0	0	8.23e-55	putative mitochondrial import inner membrane translocase subunit TIM8 protein [Rutstroemia sp. NJR-2017a BVV2]	tig00000136_pilon_C.paspali	1133949	1134422
g10857.t1	Y(0.927)	-	Cytoplasmiceffector	gb|PQE16520.1|	96	94	1	96	96	7	1	2	1.46e-55	putative mitochondrial import inner membrane translocase subunit TIM8 protein [Rutstroemia sp. NJR-2017a BBW]	tig00000136_pilon_C.paspali	1133949	1134422
g10857.t1	Y(0.927)	-	Cytoplasmiceffector	gb|PQE30793.1|	96	94	1	96	96	6	1	2	3.69e-56	putative mitochondrial import inner membrane translocase subunit TIM8 protein [Rutstroemia sp. NJR-2017a WRK4]	tig00000136_pilon_C.paspali	1133949	1134422
g10857.t1	Y(0.927)	-	Cytoplasmiceffector	gb|TEY85854.1|	96	96	1	94	94	10	1	2	5.21e-53	hypothetical protein BOTCAL_0011g00490 [Botryotinia calthae]	tig00000136_pilon_C.paspali	1133949	1134422
g10857.t1	Y(0.927)	-	Cytoplasmiceffector	gb|TGO88493.1|	96	96	1	95	95	10	1	2	7.63e-54	hypothetical protein BPOR_0159g00080 [Botrytis porri]	tig00000136_pilon_C.paspali	1133949	1134422
g10857.t1	Y(0.927)	-	Cytoplasmiceffector	gb|THV55209.1|	96	96	1	94	94	11	1	2	1.94e-52	hypothetical protein BGAL_0012g00500 [Botrytis galanthina]	tig00000136_pilon_C.paspali	1133949	1134422
g10857.t1	Y(0.927)	-	Cytoplasmiceffector	ref|XP_001597938.1|	96	97	1	94	94	13	1	1	3.02e-51	predicted protein [Sclerotinia sclerotiorum 1980 UF-70]	tig00000136_pilon_C.paspali	1133949	1134422
g10857.t1	Y(0.927)	-	Cytoplasmiceffector	ref|XP_024547927.1|	96	96	1	93	93	10	1	2	2.86e-52	Bctim8 [Botrytis cinerea B05.10]	tig00000136_pilon_C.paspali	1133949	1134422
g10857.t1	Y(0.927)	-	Cytoplasmiceffector	ref|XP_024742056.1|	96	96	1	93	93	23	0	0	1.37e-45	hypothetical protein K444DRAFT_608827 [Meliniomyces bicolor E]	tig00000136_pilon_C.paspali	1133949	1134422
g10858.t1	Y(0.986)	-	Cytoplasmiceffector	emb|CZS92850.1|	153	179	3	153	156	17	2	5	5.25e-86	probable ribosomal protein L23a, cytosolic [Rhynchosporium agropyri]	tig00000136_pilon_C.paspali	1134963	1135731
g10858.t1	Y(0.986)	-	Cytoplasmiceffector	gb|PMD28329.1|	153	156	3	153	155	12	2	4	1.77e-90	60S ribosomal protein L25 [Pezoloma ericae]	tig00000136_pilon_C.paspali	1134963	1135731
g10858.t1	Y(0.986)	-	Cytoplasmiceffector	gb|PMD43371.1|	153	156	3	153	155	13	2	4	1.69e-89	putative 60S ribosomal protein L23a [Hyaloscypha variabilis F]	tig00000136_pilon_C.paspali	1134963	1135731
g10858.t1	Y(0.986)	-	Cytoplasmiceffector	gb|PQE11924.1|	153	153	1	153	153	0	0	0	1.02e-103	60S ribosomal L25 protein [Rutstroemia sp. NJR-2017a BVV2]	tig00000136_pilon_C.paspali	1134963	1135731
g10858.t1	Y(0.986)	-	Cytoplasmiceffector	gb|RAL62300.1|	153	154	25	153	129	2	0	0	1.75e-84	hypothetical protein DID88_004866 [Monilinia fructigena]	tig00000136_pilon_C.paspali	1134963	1135731
g10858.t1	Y(0.986)	-	Cytoplasmiceffector	gb|RDW70108.1|	153	157	1	153	157	15	2	4	9.59e-88	putative ribosomal protein L23a [Coleophoma crateriformis]	tig00000136_pilon_C.paspali	1134963	1135731
g10858.t1	Y(0.986)	-	Cytoplasmiceffector	gb|TAQ85643.1|	153	154	3	153	153	14	1	2	4.38e-89	hypothetical protein B7494_g6036 [Chlorociboria aeruginascens]	tig00000136_pilon_C.paspali	1134963	1135731
g10858.t1	Y(0.986)	-	Cytoplasmiceffector	ref|XP_001597937.1|	153	154	25	153	129	2	0	0	1.57e-84	60S ribosomal protein L25 [Sclerotinia sclerotiorum 1980 UF-70]	tig00000136_pilon_C.paspali	1134963	1135731
g10858.t1	Y(0.986)	-	Cytoplasmiceffector	ref|XP_024720313.1|	153	154	8	153	146	14	1	1	5.53e-86	hypothetical protein M430DRAFT_42786 [Amorphotheca resinae ATCC 22711]	tig00000136_pilon_C.paspali	1134963	1135731
g10858.t1	Y(0.986)	-	Cytoplasmiceffector	ref|XP_024742057.1|	153	156	13	153	141	10	0	0	1.77e-88	60S ribosomal protein L25 [Meliniomyces bicolor E]	tig00000136_pilon_C.paspali	1134963	1135731
g10906.t1	Y(0.906)	-	Cytoplasmiceffector	gb|ESZ99455.1|	221	258	1	219	219	59	0	0	1.74e-115	hypothetical protein SBOR_0217 [Sclerotinia borealis F-4128]	tig00000136_pilon_C.paspali	1266544	1267503
g10906.t1	Y(0.906)	-	Cytoplasmiceffector	gb|PQE11940.1|	221	210	22	220	210	18	1	11	1.3e-126	hypothetical protein CJF31_00000066 [Rutstroemia sp. NJR-2017a BVV2]	tig00000136_pilon_C.paspali	1266544	1267503
g10906.t1	Y(0.906)	-	Cytoplasmiceffector	gb|PQE16563.1|	221	221	1	221	221	19	0	0	1.04e-147	hypothetical protein CJF30_00003258 [Rutstroemia sp. NJR-2017a BBW]	tig00000136_pilon_C.paspali	1266544	1267503
g10906.t1	Y(0.906)	-	Cytoplasmiceffector	gb|PQE30762.1|	221	221	1	221	221	17	0	0	7.2e-148	hypothetical protein CJF32_00005945 [Rutstroemia sp. NJR-2017a WRK4]	tig00000136_pilon_C.paspali	1266544	1267503
g10906.t1	Y(0.906)	-	Cytoplasmiceffector	gb|TEY80580.1|	221	216	1	219	219	56	1	3	1.34e-114	hypothetical protein BOTCAL_0037g00360 [Botryotinia calthae]	tig00000136_pilon_C.paspali	1266544	1267503
g10906.t1	Y(0.906)	-	Cytoplasmiceffector	gb|TGO15209.1|	221	216	1	219	219	56	1	3	3.61e-105	hypothetical protein BTUL_0043g00640 [Botrytis tulipae]	tig00000136_pilon_C.paspali	1266544	1267503
g10906.t1	Y(0.906)	-	Cytoplasmiceffector	gb|TGO37313.1|	221	216	1	219	219	55	1	3	3.34e-105	hypothetical protein BHYA_0100g00130 [Botrytis hyacinthi]	tig00000136_pilon_C.paspali	1266544	1267503
g10906.t1	Y(0.906)	-	Cytoplasmiceffector	gb|TGO78811.1|	221	216	1	219	219	55	1	3	4.73e-108	hypothetical protein BELL_0053g00170 [Botrytis elliptica]	tig00000136_pilon_C.paspali	1266544	1267503
g10906.t1	Y(0.906)	-	Cytoplasmiceffector	ref|XP_001598099.1|	221	219	1	219	219	57	0	0	2.75e-115	hypothetical protein SS1G_00185 [Sclerotinia sclerotiorum 1980 UF-70]	tig00000136_pilon_C.paspali	1266544	1267503
g10906.t1	Y(0.906)	-	Cytoplasmiceffector	ref|XP_024547834.1|	221	216	1	219	219	55	1	3	6.94e-108	Bcfcf2 [Botrytis cinerea B05.10]	tig00000136_pilon_C.paspali	1266544	1267503
g10934.t1	Y(0.924)	-	Cytoplasmiceffector	gb|OTA61177.1|	174	174	1	174	174	3	0	0	8.47e-119	EF-hand [Hypoxylon sp. EC38]	tig00000136_pilon_C.paspali	1331647	1332469
g10934.t1	Y(0.924)	-	Cytoplasmiceffector	gb|OTB05762.1|	174	174	1	174	174	4	0	0	2.93e-118	hypothetical protein M426DRAFT_319441 [Hypoxylon sp. CI-4A]	tig00000136_pilon_C.paspali	1331647	1332469
g10934.t1	Y(0.924)	-	Cytoplasmiceffector	gb|PMD43385.1|	174	174	1	174	174	4	0	0	1.75e-118	calcineurin regulatory subunit B [Hyaloscypha variabilis F]	tig00000136_pilon_C.paspali	1331647	1332469
g10934.t1	Y(0.924)	-	Cytoplasmiceffector	gb|RDL35119.1|	174	174	1	174	174	4	0	0	1.57e-118	Calcineurin [Phialophora cf. hyalina BP 5553]	tig00000136_pilon_C.paspali	1331647	1332469
g10934.t1	Y(0.924)	-	Cytoplasmiceffector	gb|TAQ90434.1|	174	174	1	174	174	2	0	0	2.68e-119	hypothetical protein B7494_g1272 [Chlorociboria aeruginascens]	tig00000136_pilon_C.paspali	1331647	1332469
g10934.t1	Y(0.924)	-	Cytoplasmiceffector	gb|TGO60105.1|	174	176	1	174	174	3	0	0	2.66e-118	hypothetical protein BCON_0038g00200 [Botryotinia convoluta]	tig00000136_pilon_C.paspali	1331647	1332469
g10934.t1	Y(0.924)	-	Cytoplasmiceffector	gb|TGO88995.1|	174	176	1	174	174	3	0	0	2.58e-118	hypothetical protein BPOR_0130g00070 [Botrytis porri]	tig00000136_pilon_C.paspali	1331647	1332469
g10934.t1	Y(0.924)	-	Cytoplasmiceffector	ref|XP_001555369.1|	174	174	1	174	174	1	0	0	4.48e-120	Bccnb1 [Botrytis cinerea B05.10]	tig00000136_pilon_C.paspali	1331647	1332469
g10934.t1	Y(0.924)	-	Cytoplasmiceffector	ref|XP_018176258.1|	174	174	1	174	174	4	0	0	2.51e-118	calcineurin, beta subunit [Purpureocillium lilacinum]	tig00000136_pilon_C.paspali	1331647	1332469
g10934.t1	Y(0.924)	-	Cytoplasmiceffector	ref|XP_028468635.1|	174	174	1	174	174	4	0	0	1.71e-118	EF-hand [Sodiomyces alkalinus F11]	tig00000136_pilon_C.paspali	1331647	1332469
g10955.t1	Y(0.931)	-	Cytoplasmiceffector	gb|OGZ43151.1|	117	245	42	109	71	43	2	5	6.6	hypothetical protein A2719_00425 [Candidatus Ryanbacteria bacterium RIFCSPHIGHO2_01_FULL_45_22]	tig00000136_pilon_C.paspali	1387096	1387449
g10955.t1	Y(0.931)	-	Cytoplasmiceffector	ref|WP_015851624.1|	117	253	3	90	89	57	3	3	8.8	HD domain-containing protein [Desulfovibrio salexigens]	tig00000136_pilon_C.paspali	1387096	1387449
g10955.t1	Y(0.931)	-	Cytoplasmiceffector	ref|XP_028265517.1|	117	1089	4	82	81	50	2	5	2.2	cadherin-like protein 26 isoform X1 [Parambassis ranga]	tig00000136_pilon_C.paspali	1387096	1387449
g10955.t1	Y(0.931)	-	Cytoplasmiceffector	ref|XP_028265518.1|	117	1088	4	82	81	50	2	5	2.2	cadherin-like protein 26 isoform X2 [Parambassis ranga]	tig00000136_pilon_C.paspali	1387096	1387449
g10966.t1	Y(0.935)	-	Cytoplasmiceffector	gb|ESZ93648.1|	151	117	13	54	43	20	1	1	0.000235	hypothetical protein SBOR_5953 [Sclerotinia borealis F-4128]	tig00000136_pilon_C.paspali	1415346	1415850
g10966.t1	Y(0.935)	-	Cytoplasmiceffector	gb|ESZ95223.1|	151	215	10	70	65	30	1	4	1.04e-10	hypothetical protein SBOR_4391 [Sclerotinia borealis F-4128]	tig00000136_pilon_C.paspali	1415346	1415850
g10966.t1	Y(0.935)	-	Cytoplasmiceffector	gb|TGO15963.1|	151	211	13	131	131	76	1	12	1.05e-18	hypothetical protein BPAE_0528g00040 [Botrytis paeoniae]	tig00000136_pilon_C.paspali	1415346	1415850
g10966.t1	Y(0.935)	-	Cytoplasmiceffector	gb|THU78995.1|	151	374	22	91	82	38	3	15	2.9	hypothetical protein K435DRAFT_811079 [Dendrothele bispora CBS 962.96]	tig00000136_pilon_C.paspali	1415346	1415850
g10966.t1	Y(0.935)	-	Cytoplasmiceffector	gb|THV43737.1|	151	271	1	63	63	40	1	3	0.067	hypothetical protein BGAL_0981g00010 [Botrytis galanthina]	tig00000136_pilon_C.paspali	1415346	1415850
g10966.t1	Y(0.935)	-	Cytoplasmiceffector	ref|WP_117975397.1|	151	442	10	81	79	45	2	7	3.2	PBSX family phage terminase large subunit [Ruminococcus sp. AF18-22]	tig00000136_pilon_C.paspali	1415346	1415850
g10997.t1	Y(0.929)	-	Cytoplasmiceffector	gb|PQE07979.1|	193	193	1	193	193	12	0	0	6.17e-131	ribosomal- -alanine n-acetyltransferase protein [Rutstroemia sp. NJR-2017a WRK4]	tig00000136_pilon_C.paspali	1498242	1498893
g10997.t1	Y(0.929)	-	Cytoplasmiceffector	gb|PQE24609.1|	193	205	1	193	193	12	0	0	8.19e-131	ribosomal- -alanine n-acetyltransferase protein [Rutstroemia sp. NJR-2017a BVV2]	tig00000136_pilon_C.paspali	1498242	1498893
g10997.t1	Y(0.929)	-	Cytoplasmiceffector	gb|PQE26479.1|	193	193	1	193	193	13	0	0	2.65e-130	ribosomal- -alanine n-acetyltransferase protein [Rutstroemia sp. NJR-2017a BBW]	tig00000136_pilon_C.paspali	1498242	1498893
g10997.t1	Y(0.929)	-	Cytoplasmiceffector	gb|TGO08873.1|	193	203	1	185	191	35	2	6	4.47e-101	hypothetical protein BTUL_0188g00220 [Botrytis tulipae]	tig00000136_pilon_C.paspali	1498242	1498893
g10997.t1	Y(0.929)	-	Cytoplasmiceffector	gb|TGO20275.1|	193	203	1	185	191	35	2	6	5.15e-101	hypothetical protein BPAE_0316g00060 [Botrytis paeoniae]	tig00000136_pilon_C.paspali	1498242	1498893
g10997.t1	Y(0.929)	-	Cytoplasmiceffector	gb|TGO45450.1|	193	203	1	185	191	32	2	6	1.81e-106	hypothetical protein BCON_0391g00140 [Botryotinia convoluta]	tig00000136_pilon_C.paspali	1498242	1498893
g10997.t1	Y(0.929)	-	Cytoplasmiceffector	gb|TGO53162.1|	193	203	1	185	191	35	2	6	4.52e-101	hypothetical protein BOTNAR_0303g00040 [Botryotinia narcissicola]	tig00000136_pilon_C.paspali	1498242	1498893
g10997.t1	Y(0.929)	-	Cytoplasmiceffector	gb|TGO90421.1|	193	203	1	185	191	38	2	6	2.58e-99	hypothetical protein BPOR_0065g00090 [Botrytis porri]	tig00000136_pilon_C.paspali	1498242	1498893
g10997.t1	Y(0.929)	-	Cytoplasmiceffector	gb|THV48156.1|	193	203	1	185	191	34	2	6	1.09e-100	hypothetical protein BGAL_0264g00010 [Botrytis galanthina]	tig00000136_pilon_C.paspali	1498242	1498893
g10997.t1	Y(0.929)	-	Cytoplasmiceffector	ref|XP_024547137.1|	193	205	9	185	181	30	1	4	1.48e-99	Bcmak3 [Botrytis cinerea B05.10]	tig00000136_pilon_C.paspali	1498242	1498893
g11002.t1	Y(0.914)	-	Cytoplasmiceffector	emb|CZR57629.1|	149	149	1	149	149	8	0	0	2.3e-99	probable RPL28-60S large subunit ribosomal protein L27a.e [Phialocephala subalpina]	tig00000136_pilon_C.paspali	1505346	1506061
g11002.t1	Y(0.914)	-	Cytoplasmiceffector	gb|PQE07982.1|	149	149	1	149	149	4	0	0	2.81e-102	60S ribosomal L27a protein [Rutstroemia sp. NJR-2017a WRK4]	tig00000136_pilon_C.paspali	1505346	1506061
g11002.t1	Y(0.914)	-	Cytoplasmiceffector	gb|RFU29108.1|	149	149	1	149	149	7	0	0	4.38e-100	hypothetical protein B7463_g7224, partial [Scytalidium lignicola]	tig00000136_pilon_C.paspali	1505346	1506061
g11002.t1	Y(0.914)	-	Cytoplasmiceffector	gb|TEY87399.1|	149	149	1	149	149	6	0	0	1.11e-99	hypothetical protein BOTCAL_0002g00050 [Botryotinia calthae]	tig00000136_pilon_C.paspali	1505346	1506061
g11002.t1	Y(0.914)	-	Cytoplasmiceffector	gb|TGO21274.1|	149	149	1	149	149	5	0	0	1.86e-100	hypothetical protein BPAE_0229g00050 [Botrytis paeoniae]	tig00000136_pilon_C.paspali	1505346	1506061
g11002.t1	Y(0.914)	-	Cytoplasmiceffector	gb|TGO34275.1|	149	149	1	149	149	6	0	0	8.75e-100	hypothetical protein BHYA_0204g00030 [Botrytis hyacinthi]	tig00000136_pilon_C.paspali	1505346	1506061
g11002.t1	Y(0.914)	-	Cytoplasmiceffector	ref|XP_001552794.1|	149	149	1	149	149	6	0	0	1.19e-99	Bcrpl28 [Botrytis cinerea B05.10]	tig00000136_pilon_C.paspali	1505346	1506061
g11002.t1	Y(0.914)	-	Cytoplasmiceffector	ref|XP_001587898.1|	149	149	1	149	149	5	0	0	1.27e-100	60S ribosomal protein L28 [Sclerotinia sclerotiorum 1980 UF-70]	tig00000136_pilon_C.paspali	1505346	1506061
g11002.t1	Y(0.914)	-	Cytoplasmiceffector	ref|XP_008078314.1|	149	149	1	149	149	8	0	0	1.67e-99	Ribosomal proteins L15p and L18e [Glarea lozoyensis ATCC 20868]	tig00000136_pilon_C.paspali	1505346	1506061
g11002.t1	Y(0.914)	-	Cytoplasmiceffector	ref|XP_018069216.1|	149	149	1	149	149	7	0	0	7.03e-100	putative 60S ribosomal protein L27a [Phialocephala scopiformis]	tig00000136_pilon_C.paspali	1505346	1506061
g11047.t1	Y(0.984)	-	Cytoplasmiceffector	emb|CZR65913.1|	132	727	3	119	154	82	4	37	0.73	uncharacterized protein PAC_15813 [Phialocephala subalpina]	tig00000136_pilon_C.paspali	1638825	1639223
g11047.t1	Y(0.984)	-	Cytoplasmiceffector	gb|EHK95983.1|	132	510	2	118	121	76	4	12	0.34	hypothetical protein M7I_8335 [Glarea lozoyensis 74030]	tig00000136_pilon_C.paspali	1638825	1639223
g11047.t1	Y(0.984)	-	Cytoplasmiceffector	gb|OCK75834.1|	132	541	3	66	64	39	1	5	0.78	DUF1766-domain-containing protein [Lepidopterella palustris CBS 459.81]	tig00000136_pilon_C.paspali	1638825	1639223
g11047.t1	Y(0.984)	-	Cytoplasmiceffector	gb|ODM18843.1|	132	488	3	98	97	61	2	10	0.13	hypothetical protein SI65_05460 [Aspergillus cristatus]	tig00000136_pilon_C.paspali	1638825	1639223
g11047.t1	Y(0.984)	-	Cytoplasmiceffector	gb|PMD36114.1|	132	664	3	119	153	78	3	36	0.015	DUF1766-domain-containing protein [Hyaloscypha variabilis F]	tig00000136_pilon_C.paspali	1638825	1639223
g11047.t1	Y(0.984)	-	Cytoplasmiceffector	gb|PMD41773.1|	132	641	2	109	110	68	2	8	0.014	DUF1766-domain-containing protein [Hyaloscypha variabilis F]	tig00000136_pilon_C.paspali	1638825	1639223
g11047.t1	Y(0.984)	-	Cytoplasmiceffector	gb|RLD65769.1|	132	219	1	48	52	25	2	5	0.63	ABC transporter permease [Bacteroidetes bacterium]	tig00000136_pilon_C.paspali	1638825	1639223
g11047.t1	Y(0.984)	-	Cytoplasmiceffector	ref|XP_008080497.1|	132	526	2	117	120	75	4	12	0.28	hypothetical protein GLAREA_07618 [Glarea lozoyensis ATCC 20868]	tig00000136_pilon_C.paspali	1638825	1639223
g11047.t1	Y(0.984)	-	Cytoplasmiceffector	ref|XP_022402945.1|	132	267	3	54	53	30	1	1	0.054	hypothetical protein ASPGLDRAFT_24378 [Aspergillus glaucus CBS 516.65]	tig00000136_pilon_C.paspali	1638825	1639223
g11047.t1	Y(0.984)	-	Cytoplasmiceffector	ref|XP_660926.1|	132	490	2	104	126	65	4	28	0.000407	hypothetical protein AN3322.2 [Aspergillus nidulans FGSC A4]	tig00000136_pilon_C.paspali	1638825	1639223
g11075.t1	Y(0.926)	-	Cytoplasmiceffector	gb|APA14395.1|	153	138	1	150	150	62	1	12	2.57e-41	hypothetical protein sscle_12g091650 [Sclerotinia sclerotiorum 1980 UF-70]	tig00000136_pilon_C.paspali	1721473	1722091
g11075.t1	Y(0.926)	-	Cytoplasmiceffector	gb|ESZ92445.1|	153	167	1	150	151	70	1	1	1.03e-48	hypothetical protein SBOR_7162 [Sclerotinia borealis F-4128]	tig00000136_pilon_C.paspali	1721473	1722091
g11075.t1	Y(0.926)	-	Cytoplasmiceffector	gb|PQE07926.1|	153	153	1	150	150	49	0	0	1.61e-69	hypothetical protein CJF32_00003038 [Rutstroemia sp. NJR-2017a WRK4]	tig00000136_pilon_C.paspali	1721473	1722091
g11075.t1	Y(0.926)	-	Cytoplasmiceffector	gb|PQE26526.1|	153	153	1	150	150	48	0	0	1.1e-69	hypothetical protein CJF30_00001260 [Rutstroemia sp. NJR-2017a BBW]	tig00000136_pilon_C.paspali	1721473	1722091
g11075.t1	Y(0.926)	-	Cytoplasmiceffector	gb|TDZ17580.1|	153	167	4	153	150	86	0	0	1.1e-31	hypothetical protein Cob_v009434 [Colletotrichum orbiculare MAFF 240422]	tig00000136_pilon_C.paspali	1721473	1722091
g11075.t1	Y(0.926)	-	Cytoplasmiceffector	gb|TDZ27888.1|	153	167	4	153	150	86	0	0	2.36e-31	hypothetical protein C8035_v008531 [Colletotrichum spinosum]	tig00000136_pilon_C.paspali	1721473	1722091
g11075.t1	Y(0.926)	-	Cytoplasmiceffector	gb|TDZ41499.1|	153	167	4	153	150	86	0	0	1.49e-31	hypothetical protein CTRI78_v009564 [Colletotrichum trifolii]	tig00000136_pilon_C.paspali	1721473	1722091
g11075.t1	Y(0.926)	-	Cytoplasmiceffector	gb|TEA21318.1|	153	167	4	153	150	85	0	0	4.56e-33	hypothetical protein C8034_v007738 [Colletotrichum sidae]	tig00000136_pilon_C.paspali	1721473	1722091
g11075.t1	Y(0.926)	-	Cytoplasmiceffector	ref|XP_001586735.1|	153	160	1	148	148	61	1	12	9.44e-41	hypothetical protein SS1G_11764 [Sclerotinia sclerotiorum 1980 UF-70]	tig00000136_pilon_C.paspali	1721473	1722091
g11075.t1	Y(0.926)	-	Cytoplasmiceffector	ref|XP_022477878.1|	153	167	8	153	146	83	0	0	5.86e-30	hypothetical protein CORC01_04053 [Colletotrichum orchidophilum]	tig00000136_pilon_C.paspali	1721473	1722091
g11164.t1	Y(0.936)	-	Cytoplasmiceffector	gb|OJA08111.1|	111	521	44	101	58	40	0	0	5.8	hypothetical protein AZE42_08038 [Rhizopogon vesiculosus]	tig00000212_pilon_C.paspali	62275	62685
g11164.t1	Y(0.936)	-	Cytoplasmiceffector	ref|WP_072428886.1|	111	960	14	83	70	48	2	2	7.8	isoleucine--tRNA ligase [Chitinimonas taiwanensis]	tig00000212_pilon_C.paspali	62275	62685
g11164.t1	Y(0.936)	-	Cytoplasmiceffector	ref|WP_110427028.1|	111	157	10	95	86	59	2	6	3.8	bacterioferritin [Glaciecola sp. KUL10]	tig00000212_pilon_C.paspali	62275	62685
g11246.t1	Y(0.907)	-	Cytoplasmiceffector	emb|SED16593.1|	215	443	152	206	66	32	2	11	0.73	group II intron reverse transcriptase/maturase [Rhizobiales bacterium GAS191]	tig00000354_pilon_C.paspali	1399	2046
g11246.t1	Y(0.907)	-	Cytoplasmiceffector	gb|ABL63816.1|	215	662	152	215	68	28	3	9	0.046	putative retron-type reverse transcriptase [Neurospora intermedia]	tig00000354_pilon_C.paspali	1399	2046
g11246.t1	Y(0.907)	-	Cytoplasmiceffector	gb|KJS07122.1|	215	494	129	195	79	41	3	12	0.22	RNA-directed DNA polymerase (Reverse transcriptase) [Flavobacteriales bacterium BRH_c54]	tig00000354_pilon_C.paspali	1399	2046
g11246.t1	Y(0.907)	-	Cytoplasmiceffector	gb|OFT30604.1|	215	186	132	194	69	32	3	7	0.019	hypothetical protein HMPREF3171_03350 [Corynebacterium sp. HMSC08F01]	tig00000354_pilon_C.paspali	1399	2046
g11246.t1	Y(0.907)	-	Cytoplasmiceffector	ref|NP_862333.1|	215	605	153	213	61	26	2	4	0.000147	orf1 [Trichoderma harzianum]	tig00000354_pilon_C.paspali	1399	2046
g11246.t1	Y(0.907)	-	Cytoplasmiceffector	ref|WP_083291936.1|	215	326	132	194	69	32	3	7	0.083	hypothetical protein [Corynebacterium sp. HMSC08F01]	tig00000354_pilon_C.paspali	1399	2046
g11246.t1	Y(0.907)	-	Cytoplasmiceffector	ref|WP_092881245.1|	215	429	152	206	66	32	2	11	0.69	group II intron reverse transcriptase/maturase [Rhizobiales bacterium GAS188]	tig00000354_pilon_C.paspali	1399	2046
g11246.t1	Y(0.907)	-	Cytoplasmiceffector	ref|WP_092911402.1|	215	429	152	206	66	32	2	11	0.79	group II intron reverse transcriptase/maturase [Rhizobiales bacterium GAS191]	tig00000354_pilon_C.paspali	1399	2046
g11246.t1	Y(0.907)	-	Cytoplasmiceffector	ref|WP_103097567.1|	215	183	145	204	66	31	2	10	0.81	group II intron reverse transcriptase/maturase, partial [Tetragenococcus halophilus]	tig00000354_pilon_C.paspali	1399	2046
g11246.t1	Y(0.907)	-	Cytoplasmiceffector	tpg|HAH60008.1|	215	416	145	213	81	39	4	12	0.49	group II intron reverse transcriptase/maturase [Bacteroidales bacterium]	tig00000354_pilon_C.paspali	1399	2046
g11247.t1	Y(0.907)	-	Cytoplasmiceffector	emb|SED16593.1|	215	443	152	206	66	32	2	11	0.73	group II intron reverse transcriptase/maturase [Rhizobiales bacterium GAS191]	tig00000354_pilon_C.paspali	4184	4831
g11247.t1	Y(0.907)	-	Cytoplasmiceffector	gb|ABL63816.1|	215	662	152	215	68	28	3	9	0.046	putative retron-type reverse transcriptase [Neurospora intermedia]	tig00000354_pilon_C.paspali	4184	4831
g11247.t1	Y(0.907)	-	Cytoplasmiceffector	gb|KJS07122.1|	215	494	129	195	79	41	3	12	0.22	RNA-directed DNA polymerase (Reverse transcriptase) [Flavobacteriales bacterium BRH_c54]	tig00000354_pilon_C.paspali	4184	4831
g11247.t1	Y(0.907)	-	Cytoplasmiceffector	gb|OFT30604.1|	215	186	132	194	69	32	3	7	0.019	hypothetical protein HMPREF3171_03350 [Corynebacterium sp. HMSC08F01]	tig00000354_pilon_C.paspali	4184	4831
g11247.t1	Y(0.907)	-	Cytoplasmiceffector	ref|NP_862333.1|	215	605	153	213	61	26	2	4	0.000147	orf1 [Trichoderma harzianum]	tig00000354_pilon_C.paspali	4184	4831
g11247.t1	Y(0.907)	-	Cytoplasmiceffector	ref|WP_083291936.1|	215	326	132	194	69	32	3	7	0.083	hypothetical protein [Corynebacterium sp. HMSC08F01]	tig00000354_pilon_C.paspali	4184	4831
g11247.t1	Y(0.907)	-	Cytoplasmiceffector	ref|WP_092881245.1|	215	429	152	206	66	32	2	11	0.69	group II intron reverse transcriptase/maturase [Rhizobiales bacterium GAS188]	tig00000354_pilon_C.paspali	4184	4831
g11247.t1	Y(0.907)	-	Cytoplasmiceffector	ref|WP_092911402.1|	215	429	152	206	66	32	2	11	0.79	group II intron reverse transcriptase/maturase [Rhizobiales bacterium GAS191]	tig00000354_pilon_C.paspali	4184	4831
g11247.t1	Y(0.907)	-	Cytoplasmiceffector	ref|WP_103097567.1|	215	183	145	204	66	31	2	10	0.81	group II intron reverse transcriptase/maturase, partial [Tetragenococcus halophilus]	tig00000354_pilon_C.paspali	4184	4831
g11247.t1	Y(0.907)	-	Cytoplasmiceffector	tpg|HAH60008.1|	215	416	145	213	81	39	4	12	0.49	group II intron reverse transcriptase/maturase [Bacteroidales bacterium]	tig00000354_pilon_C.paspali	4184	4831
g11248.t1	Y(0.907)	-	Cytoplasmiceffector	emb|SED16593.1|	215	443	152	206	66	32	2	11	0.73	group II intron reverse transcriptase/maturase [Rhizobiales bacterium GAS191]	tig00000354_pilon_C.paspali	6970	7617
g11248.t1	Y(0.907)	-	Cytoplasmiceffector	gb|ABL63816.1|	215	662	152	215	68	28	3	9	0.046	putative retron-type reverse transcriptase [Neurospora intermedia]	tig00000354_pilon_C.paspali	6970	7617
g11248.t1	Y(0.907)	-	Cytoplasmiceffector	gb|KJS07122.1|	215	494	129	195	79	41	3	12	0.22	RNA-directed DNA polymerase (Reverse transcriptase) [Flavobacteriales bacterium BRH_c54]	tig00000354_pilon_C.paspali	6970	7617
g11248.t1	Y(0.907)	-	Cytoplasmiceffector	gb|OFT30604.1|	215	186	132	194	69	32	3	7	0.019	hypothetical protein HMPREF3171_03350 [Corynebacterium sp. HMSC08F01]	tig00000354_pilon_C.paspali	6970	7617
g11248.t1	Y(0.907)	-	Cytoplasmiceffector	ref|NP_862333.1|	215	605	153	213	61	26	2	4	0.000147	orf1 [Trichoderma harzianum]	tig00000354_pilon_C.paspali	6970	7617
g11248.t1	Y(0.907)	-	Cytoplasmiceffector	ref|WP_083291936.1|	215	326	132	194	69	32	3	7	0.083	hypothetical protein [Corynebacterium sp. HMSC08F01]	tig00000354_pilon_C.paspali	6970	7617
g11248.t1	Y(0.907)	-	Cytoplasmiceffector	ref|WP_092881245.1|	215	429	152	206	66	32	2	11	0.69	group II intron reverse transcriptase/maturase [Rhizobiales bacterium GAS188]	tig00000354_pilon_C.paspali	6970	7617
g11248.t1	Y(0.907)	-	Cytoplasmiceffector	ref|WP_092911402.1|	215	429	152	206	66	32	2	11	0.79	group II intron reverse transcriptase/maturase [Rhizobiales bacterium GAS191]	tig00000354_pilon_C.paspali	6970	7617
g11248.t1	Y(0.907)	-	Cytoplasmiceffector	ref|WP_103097567.1|	215	183	145	204	66	31	2	10	0.81	group II intron reverse transcriptase/maturase, partial [Tetragenococcus halophilus]	tig00000354_pilon_C.paspali	6970	7617
g11248.t1	Y(0.907)	-	Cytoplasmiceffector	tpg|HAH60008.1|	215	416	145	213	81	39	4	12	0.49	group II intron reverse transcriptase/maturase [Bacteroidales bacterium]	tig00000354_pilon_C.paspali	6970	7617
g11249.t1	Y(0.907)	-	Cytoplasmiceffector	emb|SED16593.1|	215	443	152	206	66	32	2	11	0.73	group II intron reverse transcriptase/maturase [Rhizobiales bacterium GAS191]	tig00000354_pilon_C.paspali	9756	10403
g11249.t1	Y(0.907)	-	Cytoplasmiceffector	gb|ABL63816.1|	215	662	152	215	68	28	3	9	0.046	putative retron-type reverse transcriptase [Neurospora intermedia]	tig00000354_pilon_C.paspali	9756	10403
g11249.t1	Y(0.907)	-	Cytoplasmiceffector	gb|KJS07122.1|	215	494	129	195	79	41	3	12	0.22	RNA-directed DNA polymerase (Reverse transcriptase) [Flavobacteriales bacterium BRH_c54]	tig00000354_pilon_C.paspali	9756	10403
g11249.t1	Y(0.907)	-	Cytoplasmiceffector	gb|OFT30604.1|	215	186	132	194	69	32	3	7	0.019	hypothetical protein HMPREF3171_03350 [Corynebacterium sp. HMSC08F01]	tig00000354_pilon_C.paspali	9756	10403
g11249.t1	Y(0.907)	-	Cytoplasmiceffector	ref|NP_862333.1|	215	605	153	213	61	26	2	4	0.000147	orf1 [Trichoderma harzianum]	tig00000354_pilon_C.paspali	9756	10403
g11249.t1	Y(0.907)	-	Cytoplasmiceffector	ref|WP_083291936.1|	215	326	132	194	69	32	3	7	0.083	hypothetical protein [Corynebacterium sp. HMSC08F01]	tig00000354_pilon_C.paspali	9756	10403
g11249.t1	Y(0.907)	-	Cytoplasmiceffector	ref|WP_092881245.1|	215	429	152	206	66	32	2	11	0.69	group II intron reverse transcriptase/maturase [Rhizobiales bacterium GAS188]	tig00000354_pilon_C.paspali	9756	10403
g11249.t1	Y(0.907)	-	Cytoplasmiceffector	ref|WP_092911402.1|	215	429	152	206	66	32	2	11	0.79	group II intron reverse transcriptase/maturase [Rhizobiales bacterium GAS191]	tig00000354_pilon_C.paspali	9756	10403
g11249.t1	Y(0.907)	-	Cytoplasmiceffector	ref|WP_103097567.1|	215	183	145	204	66	31	2	10	0.81	group II intron reverse transcriptase/maturase, partial [Tetragenococcus halophilus]	tig00000354_pilon_C.paspali	9756	10403
g11249.t1	Y(0.907)	-	Cytoplasmiceffector	tpg|HAH60008.1|	215	416	145	213	81	39	4	12	0.49	group II intron reverse transcriptase/maturase [Bacteroidales bacterium]	tig00000354_pilon_C.paspali	9756	10403
g11250.t1	Y(0.907)	-	Cytoplasmiceffector	emb|SED16593.1|	215	443	152	206	66	32	2	11	0.73	group II intron reverse transcriptase/maturase [Rhizobiales bacterium GAS191]	tig00000354_pilon_C.paspali	12542	13189
g11250.t1	Y(0.907)	-	Cytoplasmiceffector	gb|ABL63816.1|	215	662	152	215	68	28	3	9	0.046	putative retron-type reverse transcriptase [Neurospora intermedia]	tig00000354_pilon_C.paspali	12542	13189
g11250.t1	Y(0.907)	-	Cytoplasmiceffector	gb|KJS07122.1|	215	494	129	195	79	41	3	12	0.22	RNA-directed DNA polymerase (Reverse transcriptase) [Flavobacteriales bacterium BRH_c54]	tig00000354_pilon_C.paspali	12542	13189
g11250.t1	Y(0.907)	-	Cytoplasmiceffector	gb|OFT30604.1|	215	186	132	194	69	32	3	7	0.019	hypothetical protein HMPREF3171_03350 [Corynebacterium sp. HMSC08F01]	tig00000354_pilon_C.paspali	12542	13189
g11250.t1	Y(0.907)	-	Cytoplasmiceffector	ref|NP_862333.1|	215	605	153	213	61	26	2	4	0.000147	orf1 [Trichoderma harzianum]	tig00000354_pilon_C.paspali	12542	13189
g11250.t1	Y(0.907)	-	Cytoplasmiceffector	ref|WP_083291936.1|	215	326	132	194	69	32	3	7	0.083	hypothetical protein [Corynebacterium sp. HMSC08F01]	tig00000354_pilon_C.paspali	12542	13189
g11250.t1	Y(0.907)	-	Cytoplasmiceffector	ref|WP_092881245.1|	215	429	152	206	66	32	2	11	0.69	group II intron reverse transcriptase/maturase [Rhizobiales bacterium GAS188]	tig00000354_pilon_C.paspali	12542	13189
g11250.t1	Y(0.907)	-	Cytoplasmiceffector	ref|WP_092911402.1|	215	429	152	206	66	32	2	11	0.79	group II intron reverse transcriptase/maturase [Rhizobiales bacterium GAS191]	tig00000354_pilon_C.paspali	12542	13189
g11250.t1	Y(0.907)	-	Cytoplasmiceffector	ref|WP_103097567.1|	215	183	145	204	66	31	2	10	0.81	group II intron reverse transcriptase/maturase, partial [Tetragenococcus halophilus]	tig00000354_pilon_C.paspali	12542	13189
g11250.t1	Y(0.907)	-	Cytoplasmiceffector	tpg|HAH60008.1|	215	416	145	213	81	39	4	12	0.49	group II intron reverse transcriptase/maturase [Bacteroidales bacterium]	tig00000354_pilon_C.paspali	12542	13189
g11251.t1	Y(0.907)	-	Cytoplasmiceffector	emb|SED16593.1|	215	443	152	206	66	32	2	11	0.73	group II intron reverse transcriptase/maturase [Rhizobiales bacterium GAS191]	tig00000354_pilon_C.paspali	15328	15975
g11251.t1	Y(0.907)	-	Cytoplasmiceffector	gb|ABL63816.1|	215	662	152	215	68	28	3	9	0.046	putative retron-type reverse transcriptase [Neurospora intermedia]	tig00000354_pilon_C.paspali	15328	15975
g11251.t1	Y(0.907)	-	Cytoplasmiceffector	gb|KJS07122.1|	215	494	129	195	79	41	3	12	0.22	RNA-directed DNA polymerase (Reverse transcriptase) [Flavobacteriales bacterium BRH_c54]	tig00000354_pilon_C.paspali	15328	15975
g11251.t1	Y(0.907)	-	Cytoplasmiceffector	gb|OFT30604.1|	215	186	132	194	69	32	3	7	0.019	hypothetical protein HMPREF3171_03350 [Corynebacterium sp. HMSC08F01]	tig00000354_pilon_C.paspali	15328	15975
g11251.t1	Y(0.907)	-	Cytoplasmiceffector	ref|NP_862333.1|	215	605	153	213	61	26	2	4	0.000147	orf1 [Trichoderma harzianum]	tig00000354_pilon_C.paspali	15328	15975
g11251.t1	Y(0.907)	-	Cytoplasmiceffector	ref|WP_083291936.1|	215	326	132	194	69	32	3	7	0.083	hypothetical protein [Corynebacterium sp. HMSC08F01]	tig00000354_pilon_C.paspali	15328	15975
g11251.t1	Y(0.907)	-	Cytoplasmiceffector	ref|WP_092881245.1|	215	429	152	206	66	32	2	11	0.69	group II intron reverse transcriptase/maturase [Rhizobiales bacterium GAS188]	tig00000354_pilon_C.paspali	15328	15975
g11251.t1	Y(0.907)	-	Cytoplasmiceffector	ref|WP_092911402.1|	215	429	152	206	66	32	2	11	0.79	group II intron reverse transcriptase/maturase [Rhizobiales bacterium GAS191]	tig00000354_pilon_C.paspali	15328	15975
g11251.t1	Y(0.907)	-	Cytoplasmiceffector	ref|WP_103097567.1|	215	183	145	204	66	31	2	10	0.81	group II intron reverse transcriptase/maturase, partial [Tetragenococcus halophilus]	tig00000354_pilon_C.paspali	15328	15975
g11251.t1	Y(0.907)	-	Cytoplasmiceffector	tpg|HAH60008.1|	215	416	145	213	81	39	4	12	0.49	group II intron reverse transcriptase/maturase [Bacteroidales bacterium]	tig00000354_pilon_C.paspali	15328	15975
g11252.t1	Y(0.907)	-	Cytoplasmiceffector	emb|SED16593.1|	215	443	152	206	66	32	2	11	0.73	group II intron reverse transcriptase/maturase [Rhizobiales bacterium GAS191]	tig00000354_pilon_C.paspali	18114	18761
g11252.t1	Y(0.907)	-	Cytoplasmiceffector	gb|ABL63816.1|	215	662	152	215	68	28	3	9	0.046	putative retron-type reverse transcriptase [Neurospora intermedia]	tig00000354_pilon_C.paspali	18114	18761
g11252.t1	Y(0.907)	-	Cytoplasmiceffector	gb|KJS07122.1|	215	494	129	195	79	41	3	12	0.22	RNA-directed DNA polymerase (Reverse transcriptase) [Flavobacteriales bacterium BRH_c54]	tig00000354_pilon_C.paspali	18114	18761
g11252.t1	Y(0.907)	-	Cytoplasmiceffector	gb|OFT30604.1|	215	186	132	194	69	32	3	7	0.019	hypothetical protein HMPREF3171_03350 [Corynebacterium sp. HMSC08F01]	tig00000354_pilon_C.paspali	18114	18761
g11252.t1	Y(0.907)	-	Cytoplasmiceffector	ref|NP_862333.1|	215	605	153	213	61	26	2	4	0.000147	orf1 [Trichoderma harzianum]	tig00000354_pilon_C.paspali	18114	18761
g11252.t1	Y(0.907)	-	Cytoplasmiceffector	ref|WP_083291936.1|	215	326	132	194	69	32	3	7	0.083	hypothetical protein [Corynebacterium sp. HMSC08F01]	tig00000354_pilon_C.paspali	18114	18761
g11252.t1	Y(0.907)	-	Cytoplasmiceffector	ref|WP_092881245.1|	215	429	152	206	66	32	2	11	0.69	group II intron reverse transcriptase/maturase [Rhizobiales bacterium GAS188]	tig00000354_pilon_C.paspali	18114	18761
g11252.t1	Y(0.907)	-	Cytoplasmiceffector	ref|WP_092911402.1|	215	429	152	206	66	32	2	11	0.79	group II intron reverse transcriptase/maturase [Rhizobiales bacterium GAS191]	tig00000354_pilon_C.paspali	18114	18761
g11252.t1	Y(0.907)	-	Cytoplasmiceffector	ref|WP_103097567.1|	215	183	145	204	66	31	2	10	0.81	group II intron reverse transcriptase/maturase, partial [Tetragenococcus halophilus]	tig00000354_pilon_C.paspali	18114	18761
g11252.t1	Y(0.907)	-	Cytoplasmiceffector	tpg|HAH60008.1|	215	416	145	213	81	39	4	12	0.49	group II intron reverse transcriptase/maturase [Bacteroidales bacterium]	tig00000354_pilon_C.paspali	18114	18761
g11253.t1	Y(0.907)	-	Cytoplasmiceffector	emb|SED16593.1|	215	443	152	206	66	32	2	11	0.73	group II intron reverse transcriptase/maturase [Rhizobiales bacterium GAS191]	tig00000363_pilon_C.paspali	1310	1957
g11253.t1	Y(0.907)	-	Cytoplasmiceffector	gb|ABL63816.1|	215	662	152	215	68	28	3	9	0.046	putative retron-type reverse transcriptase [Neurospora intermedia]	tig00000363_pilon_C.paspali	1310	1957
g11253.t1	Y(0.907)	-	Cytoplasmiceffector	gb|KJS07122.1|	215	494	129	195	79	41	3	12	0.22	RNA-directed DNA polymerase (Reverse transcriptase) [Flavobacteriales bacterium BRH_c54]	tig00000363_pilon_C.paspali	1310	1957
g11253.t1	Y(0.907)	-	Cytoplasmiceffector	gb|OFT30604.1|	215	186	132	194	69	32	3	7	0.019	hypothetical protein HMPREF3171_03350 [Corynebacterium sp. HMSC08F01]	tig00000363_pilon_C.paspali	1310	1957
g11253.t1	Y(0.907)	-	Cytoplasmiceffector	ref|NP_862333.1|	215	605	153	213	61	26	2	4	0.000147	orf1 [Trichoderma harzianum]	tig00000363_pilon_C.paspali	1310	1957
g11253.t1	Y(0.907)	-	Cytoplasmiceffector	ref|WP_083291936.1|	215	326	132	194	69	32	3	7	0.083	hypothetical protein [Corynebacterium sp. HMSC08F01]	tig00000363_pilon_C.paspali	1310	1957
g11253.t1	Y(0.907)	-	Cytoplasmiceffector	ref|WP_092881245.1|	215	429	152	206	66	32	2	11	0.69	group II intron reverse transcriptase/maturase [Rhizobiales bacterium GAS188]	tig00000363_pilon_C.paspali	1310	1957
g11253.t1	Y(0.907)	-	Cytoplasmiceffector	ref|WP_092911402.1|	215	429	152	206	66	32	2	11	0.79	group II intron reverse transcriptase/maturase [Rhizobiales bacterium GAS191]	tig00000363_pilon_C.paspali	1310	1957
g11253.t1	Y(0.907)	-	Cytoplasmiceffector	ref|WP_103097567.1|	215	183	145	204	66	31	2	10	0.81	group II intron reverse transcriptase/maturase, partial [Tetragenococcus halophilus]	tig00000363_pilon_C.paspali	1310	1957
g11253.t1	Y(0.907)	-	Cytoplasmiceffector	tpg|HAH60008.1|	215	416	145	213	81	39	4	12	0.49	group II intron reverse transcriptase/maturase [Bacteroidales bacterium]	tig00000363_pilon_C.paspali	1310	1957
g11254.t1	Y(0.907)	-	Cytoplasmiceffector	emb|SED16593.1|	215	443	152	206	66	32	2	11	0.73	group II intron reverse transcriptase/maturase [Rhizobiales bacterium GAS191]	tig00000363_pilon_C.paspali	4094	4741
g11254.t1	Y(0.907)	-	Cytoplasmiceffector	gb|ABL63816.1|	215	662	152	215	68	28	3	9	0.046	putative retron-type reverse transcriptase [Neurospora intermedia]	tig00000363_pilon_C.paspali	4094	4741
g11254.t1	Y(0.907)	-	Cytoplasmiceffector	gb|KJS07122.1|	215	494	129	195	79	41	3	12	0.22	RNA-directed DNA polymerase (Reverse transcriptase) [Flavobacteriales bacterium BRH_c54]	tig00000363_pilon_C.paspali	4094	4741
g11254.t1	Y(0.907)	-	Cytoplasmiceffector	gb|OFT30604.1|	215	186	132	194	69	32	3	7	0.019	hypothetical protein HMPREF3171_03350 [Corynebacterium sp. HMSC08F01]	tig00000363_pilon_C.paspali	4094	4741
g11254.t1	Y(0.907)	-	Cytoplasmiceffector	ref|NP_862333.1|	215	605	153	213	61	26	2	4	0.000147	orf1 [Trichoderma harzianum]	tig00000363_pilon_C.paspali	4094	4741
g11254.t1	Y(0.907)	-	Cytoplasmiceffector	ref|WP_083291936.1|	215	326	132	194	69	32	3	7	0.083	hypothetical protein [Corynebacterium sp. HMSC08F01]	tig00000363_pilon_C.paspali	4094	4741
g11254.t1	Y(0.907)	-	Cytoplasmiceffector	ref|WP_092881245.1|	215	429	152	206	66	32	2	11	0.69	group II intron reverse transcriptase/maturase [Rhizobiales bacterium GAS188]	tig00000363_pilon_C.paspali	4094	4741
g11254.t1	Y(0.907)	-	Cytoplasmiceffector	ref|WP_092911402.1|	215	429	152	206	66	32	2	11	0.79	group II intron reverse transcriptase/maturase [Rhizobiales bacterium GAS191]	tig00000363_pilon_C.paspali	4094	4741
g11254.t1	Y(0.907)	-	Cytoplasmiceffector	ref|WP_103097567.1|	215	183	145	204	66	31	2	10	0.81	group II intron reverse transcriptase/maturase, partial [Tetragenococcus halophilus]	tig00000363_pilon_C.paspali	4094	4741
g11254.t1	Y(0.907)	-	Cytoplasmiceffector	tpg|HAH60008.1|	215	416	145	213	81	39	4	12	0.49	group II intron reverse transcriptase/maturase [Bacteroidales bacterium]	tig00000363_pilon_C.paspali	4094	4741
g11255.t1	Y(0.907)	-	Cytoplasmiceffector	emb|SED16593.1|	215	443	152	206	66	32	2	11	0.73	group II intron reverse transcriptase/maturase [Rhizobiales bacterium GAS191]	tig00000363_pilon_C.paspali	6880	7527
g11255.t1	Y(0.907)	-	Cytoplasmiceffector	gb|ABL63816.1|	215	662	152	215	68	28	3	9	0.046	putative retron-type reverse transcriptase [Neurospora intermedia]	tig00000363_pilon_C.paspali	6880	7527
g11255.t1	Y(0.907)	-	Cytoplasmiceffector	gb|KJS07122.1|	215	494	129	195	79	41	3	12	0.22	RNA-directed DNA polymerase (Reverse transcriptase) [Flavobacteriales bacterium BRH_c54]	tig00000363_pilon_C.paspali	6880	7527
g11255.t1	Y(0.907)	-	Cytoplasmiceffector	gb|OFT30604.1|	215	186	132	194	69	32	3	7	0.019	hypothetical protein HMPREF3171_03350 [Corynebacterium sp. HMSC08F01]	tig00000363_pilon_C.paspali	6880	7527
g11255.t1	Y(0.907)	-	Cytoplasmiceffector	ref|NP_862333.1|	215	605	153	213	61	26	2	4	0.000147	orf1 [Trichoderma harzianum]	tig00000363_pilon_C.paspali	6880	7527
g11255.t1	Y(0.907)	-	Cytoplasmiceffector	ref|WP_083291936.1|	215	326	132	194	69	32	3	7	0.083	hypothetical protein [Corynebacterium sp. HMSC08F01]	tig00000363_pilon_C.paspali	6880	7527
g11255.t1	Y(0.907)	-	Cytoplasmiceffector	ref|WP_092881245.1|	215	429	152	206	66	32	2	11	0.69	group II intron reverse transcriptase/maturase [Rhizobiales bacterium GAS188]	tig00000363_pilon_C.paspali	6880	7527
g11255.t1	Y(0.907)	-	Cytoplasmiceffector	ref|WP_092911402.1|	215	429	152	206	66	32	2	11	0.79	group II intron reverse transcriptase/maturase [Rhizobiales bacterium GAS191]	tig00000363_pilon_C.paspali	6880	7527
g11255.t1	Y(0.907)	-	Cytoplasmiceffector	ref|WP_103097567.1|	215	183	145	204	66	31	2	10	0.81	group II intron reverse transcriptase/maturase, partial [Tetragenococcus halophilus]	tig00000363_pilon_C.paspali	6880	7527
g11255.t1	Y(0.907)	-	Cytoplasmiceffector	tpg|HAH60008.1|	215	416	145	213	81	39	4	12	0.49	group II intron reverse transcriptase/maturase [Bacteroidales bacterium]	tig00000363_pilon_C.paspali	6880	7527
g11256.t1	Y(0.907)	-	Cytoplasmiceffector	emb|SED16593.1|	215	443	152	206	66	32	2	11	0.73	group II intron reverse transcriptase/maturase [Rhizobiales bacterium GAS191]	tig00000363_pilon_C.paspali	9666	10313
g11256.t1	Y(0.907)	-	Cytoplasmiceffector	gb|ABL63816.1|	215	662	152	215	68	28	3	9	0.046	putative retron-type reverse transcriptase [Neurospora intermedia]	tig00000363_pilon_C.paspali	9666	10313
g11256.t1	Y(0.907)	-	Cytoplasmiceffector	gb|KJS07122.1|	215	494	129	195	79	41	3	12	0.22	RNA-directed DNA polymerase (Reverse transcriptase) [Flavobacteriales bacterium BRH_c54]	tig00000363_pilon_C.paspali	9666	10313
g11256.t1	Y(0.907)	-	Cytoplasmiceffector	gb|OFT30604.1|	215	186	132	194	69	32	3	7	0.019	hypothetical protein HMPREF3171_03350 [Corynebacterium sp. HMSC08F01]	tig00000363_pilon_C.paspali	9666	10313
g11256.t1	Y(0.907)	-	Cytoplasmiceffector	ref|NP_862333.1|	215	605	153	213	61	26	2	4	0.000147	orf1 [Trichoderma harzianum]	tig00000363_pilon_C.paspali	9666	10313
g11256.t1	Y(0.907)	-	Cytoplasmiceffector	ref|WP_083291936.1|	215	326	132	194	69	32	3	7	0.083	hypothetical protein [Corynebacterium sp. HMSC08F01]	tig00000363_pilon_C.paspali	9666	10313
g11256.t1	Y(0.907)	-	Cytoplasmiceffector	ref|WP_092881245.1|	215	429	152	206	66	32	2	11	0.69	group II intron reverse transcriptase/maturase [Rhizobiales bacterium GAS188]	tig00000363_pilon_C.paspali	9666	10313
g11256.t1	Y(0.907)	-	Cytoplasmiceffector	ref|WP_092911402.1|	215	429	152	206	66	32	2	11	0.79	group II intron reverse transcriptase/maturase [Rhizobiales bacterium GAS191]	tig00000363_pilon_C.paspali	9666	10313
g11256.t1	Y(0.907)	-	Cytoplasmiceffector	ref|WP_103097567.1|	215	183	145	204	66	31	2	10	0.81	group II intron reverse transcriptase/maturase, partial [Tetragenococcus halophilus]	tig00000363_pilon_C.paspali	9666	10313
g11256.t1	Y(0.907)	-	Cytoplasmiceffector	tpg|HAH60008.1|	215	416	145	213	81	39	4	12	0.49	group II intron reverse transcriptase/maturase [Bacteroidales bacterium]	tig00000363_pilon_C.paspali	9666	10313
g11257.t1	Y(0.907)	-	Cytoplasmiceffector	emb|SED16593.1|	215	443	152	206	66	32	2	11	0.73	group II intron reverse transcriptase/maturase [Rhizobiales bacterium GAS191]	tig00000363_pilon_C.paspali	12452	13099
g11257.t1	Y(0.907)	-	Cytoplasmiceffector	gb|ABL63816.1|	215	662	152	215	68	28	3	9	0.046	putative retron-type reverse transcriptase [Neurospora intermedia]	tig00000363_pilon_C.paspali	12452	13099
g11257.t1	Y(0.907)	-	Cytoplasmiceffector	gb|KJS07122.1|	215	494	129	195	79	41	3	12	0.22	RNA-directed DNA polymerase (Reverse transcriptase) [Flavobacteriales bacterium BRH_c54]	tig00000363_pilon_C.paspali	12452	13099
g11257.t1	Y(0.907)	-	Cytoplasmiceffector	gb|OFT30604.1|	215	186	132	194	69	32	3	7	0.019	hypothetical protein HMPREF3171_03350 [Corynebacterium sp. HMSC08F01]	tig00000363_pilon_C.paspali	12452	13099
g11257.t1	Y(0.907)	-	Cytoplasmiceffector	ref|NP_862333.1|	215	605	153	213	61	26	2	4	0.000147	orf1 [Trichoderma harzianum]	tig00000363_pilon_C.paspali	12452	13099
g11257.t1	Y(0.907)	-	Cytoplasmiceffector	ref|WP_083291936.1|	215	326	132	194	69	32	3	7	0.083	hypothetical protein [Corynebacterium sp. HMSC08F01]	tig00000363_pilon_C.paspali	12452	13099
g11257.t1	Y(0.907)	-	Cytoplasmiceffector	ref|WP_092881245.1|	215	429	152	206	66	32	2	11	0.69	group II intron reverse transcriptase/maturase [Rhizobiales bacterium GAS188]	tig00000363_pilon_C.paspali	12452	13099
g11257.t1	Y(0.907)	-	Cytoplasmiceffector	ref|WP_092911402.1|	215	429	152	206	66	32	2	11	0.79	group II intron reverse transcriptase/maturase [Rhizobiales bacterium GAS191]	tig00000363_pilon_C.paspali	12452	13099
g11257.t1	Y(0.907)	-	Cytoplasmiceffector	ref|WP_103097567.1|	215	183	145	204	66	31	2	10	0.81	group II intron reverse transcriptase/maturase, partial [Tetragenococcus halophilus]	tig00000363_pilon_C.paspali	12452	13099
g11257.t1	Y(0.907)	-	Cytoplasmiceffector	tpg|HAH60008.1|	215	416	145	213	81	39	4	12	0.49	group II intron reverse transcriptase/maturase [Bacteroidales bacterium]	tig00000363_pilon_C.paspali	12452	13099
g11258.t1	Y(0.902)	-	Cytoplasmiceffector	gb|KHN04384.1|	155	373	2	128	143	87	5	17	7.3	PI-PLC X domain-containing protein [Glycine soja]	tig00000363_pilon_C.paspali	15205	15669
g11258.t1	Y(0.902)	-	Cytoplasmiceffector	ref|WP_006317015.1|	155	90	54	141	92	53	3	11	5.9	hypothetical protein [Caldisalinibacter kiritimatiensis]	tig00000363_pilon_C.paspali	15205	15669
g11258.t1	Y(0.902)	-	Cytoplasmiceffector	ref|WP_020544547.1|	155	195	56	152	103	47	6	24	0.78	DUF937 domain-containing protein [Nonomuraea coxensis]	tig00000363_pilon_C.paspali	15205	15669
g11258.t1	Y(0.902)	-	Cytoplasmiceffector	ref|WP_133999342.1|	155	280	18	132	121	80	3	12	8.7	N-acetylglucosamine kinase [Dinghuibacter silviterrae]	tig00000363_pilon_C.paspali	15205	15669
g11258.t1	Y(0.902)	-	Cytoplasmiceffector	ref|XP_003554923.1|	155	367	2	128	143	87	5	17	7.7	PI-PLC X domain-containing protein At5g67130 [Glycine max]	tig00000363_pilon_C.paspali	15205	15669
g11258.t1	Y(0.902)	-	Cytoplasmiceffector	ref|XP_007151350.1|	155	353	2	119	132	72	6	17	0.2	hypothetical protein PHAVU_004G039000g [Phaseolus vulgaris]	tig00000363_pilon_C.paspali	15205	15669
g11258.t1	Y(0.902)	-	Cytoplasmiceffector	ref|XP_021003099.1|	155	822	9	142	137	85	3	14	8.7	tuftelin-interacting protein 11 [Parasteatoda tepidariorum]	tig00000363_pilon_C.paspali	15205	15669
g11259.t1	Y(0.907)	-	Cytoplasmiceffector	emb|SED16593.1|	215	443	152	206	66	32	2	11	0.73	group II intron reverse transcriptase/maturase [Rhizobiales bacterium GAS191]	tig00000377_pilon_C.paspali	2410	3057
g11259.t1	Y(0.907)	-	Cytoplasmiceffector	gb|ABL63816.1|	215	662	152	215	68	28	3	9	0.046	putative retron-type reverse transcriptase [Neurospora intermedia]	tig00000377_pilon_C.paspali	2410	3057
g11259.t1	Y(0.907)	-	Cytoplasmiceffector	gb|KJS07122.1|	215	494	129	195	79	41	3	12	0.22	RNA-directed DNA polymerase (Reverse transcriptase) [Flavobacteriales bacterium BRH_c54]	tig00000377_pilon_C.paspali	2410	3057
g11259.t1	Y(0.907)	-	Cytoplasmiceffector	gb|OFT30604.1|	215	186	132	194	69	32	3	7	0.019	hypothetical protein HMPREF3171_03350 [Corynebacterium sp. HMSC08F01]	tig00000377_pilon_C.paspali	2410	3057
g11259.t1	Y(0.907)	-	Cytoplasmiceffector	ref|NP_862333.1|	215	605	153	213	61	26	2	4	0.000147	orf1 [Trichoderma harzianum]	tig00000377_pilon_C.paspali	2410	3057
g11259.t1	Y(0.907)	-	Cytoplasmiceffector	ref|WP_083291936.1|	215	326	132	194	69	32	3	7	0.083	hypothetical protein [Corynebacterium sp. HMSC08F01]	tig00000377_pilon_C.paspali	2410	3057
g11259.t1	Y(0.907)	-	Cytoplasmiceffector	ref|WP_092881245.1|	215	429	152	206	66	32	2	11	0.69	group II intron reverse transcriptase/maturase [Rhizobiales bacterium GAS188]	tig00000377_pilon_C.paspali	2410	3057
g11259.t1	Y(0.907)	-	Cytoplasmiceffector	ref|WP_092911402.1|	215	429	152	206	66	32	2	11	0.79	group II intron reverse transcriptase/maturase [Rhizobiales bacterium GAS191]	tig00000377_pilon_C.paspali	2410	3057
g11259.t1	Y(0.907)	-	Cytoplasmiceffector	ref|WP_103097567.1|	215	183	145	204	66	31	2	10	0.81	group II intron reverse transcriptase/maturase, partial [Tetragenococcus halophilus]	tig00000377_pilon_C.paspali	2410	3057
g11259.t1	Y(0.907)	-	Cytoplasmiceffector	tpg|HAH60008.1|	215	416	145	213	81	39	4	12	0.49	group II intron reverse transcriptase/maturase [Bacteroidales bacterium]	tig00000377_pilon_C.paspali	2410	3057
g11260.t1	Y(0.907)	-	Cytoplasmiceffector	emb|SED16593.1|	215	443	152	206	66	32	2	11	0.73	group II intron reverse transcriptase/maturase [Rhizobiales bacterium GAS191]	tig00000377_pilon_C.paspali	5196	5843
g11260.t1	Y(0.907)	-	Cytoplasmiceffector	gb|ABL63816.1|	215	662	152	215	68	28	3	9	0.046	putative retron-type reverse transcriptase [Neurospora intermedia]	tig00000377_pilon_C.paspali	5196	5843
g11260.t1	Y(0.907)	-	Cytoplasmiceffector	gb|KJS07122.1|	215	494	129	195	79	41	3	12	0.22	RNA-directed DNA polymerase (Reverse transcriptase) [Flavobacteriales bacterium BRH_c54]	tig00000377_pilon_C.paspali	5196	5843
g11260.t1	Y(0.907)	-	Cytoplasmiceffector	gb|OFT30604.1|	215	186	132	194	69	32	3	7	0.019	hypothetical protein HMPREF3171_03350 [Corynebacterium sp. HMSC08F01]	tig00000377_pilon_C.paspali	5196	5843
g11260.t1	Y(0.907)	-	Cytoplasmiceffector	ref|NP_862333.1|	215	605	153	213	61	26	2	4	0.000147	orf1 [Trichoderma harzianum]	tig00000377_pilon_C.paspali	5196	5843
g11260.t1	Y(0.907)	-	Cytoplasmiceffector	ref|WP_083291936.1|	215	326	132	194	69	32	3	7	0.083	hypothetical protein [Corynebacterium sp. HMSC08F01]	tig00000377_pilon_C.paspali	5196	5843
g11260.t1	Y(0.907)	-	Cytoplasmiceffector	ref|WP_092881245.1|	215	429	152	206	66	32	2	11	0.69	group II intron reverse transcriptase/maturase [Rhizobiales bacterium GAS188]	tig00000377_pilon_C.paspali	5196	5843
g11260.t1	Y(0.907)	-	Cytoplasmiceffector	ref|WP_092911402.1|	215	429	152	206	66	32	2	11	0.79	group II intron reverse transcriptase/maturase [Rhizobiales bacterium GAS191]	tig00000377_pilon_C.paspali	5196	5843
g11260.t1	Y(0.907)	-	Cytoplasmiceffector	ref|WP_103097567.1|	215	183	145	204	66	31	2	10	0.81	group II intron reverse transcriptase/maturase, partial [Tetragenococcus halophilus]	tig00000377_pilon_C.paspali	5196	5843
g11260.t1	Y(0.907)	-	Cytoplasmiceffector	tpg|HAH60008.1|	215	416	145	213	81	39	4	12	0.49	group II intron reverse transcriptase/maturase [Bacteroidales bacterium]	tig00000377_pilon_C.paspali	5196	5843
g11261.t1	Y(0.907)	-	Cytoplasmiceffector	emb|SED16593.1|	215	443	152	206	66	32	2	11	0.73	group II intron reverse transcriptase/maturase [Rhizobiales bacterium GAS191]	tig00000377_pilon_C.paspali	7982	8629
g11261.t1	Y(0.907)	-	Cytoplasmiceffector	gb|ABL63816.1|	215	662	152	215	68	28	3	9	0.046	putative retron-type reverse transcriptase [Neurospora intermedia]	tig00000377_pilon_C.paspali	7982	8629
g11261.t1	Y(0.907)	-	Cytoplasmiceffector	gb|KJS07122.1|	215	494	129	195	79	41	3	12	0.22	RNA-directed DNA polymerase (Reverse transcriptase) [Flavobacteriales bacterium BRH_c54]	tig00000377_pilon_C.paspali	7982	8629
g11261.t1	Y(0.907)	-	Cytoplasmiceffector	gb|OFT30604.1|	215	186	132	194	69	32	3	7	0.019	hypothetical protein HMPREF3171_03350 [Corynebacterium sp. HMSC08F01]	tig00000377_pilon_C.paspali	7982	8629
g11261.t1	Y(0.907)	-	Cytoplasmiceffector	ref|NP_862333.1|	215	605	153	213	61	26	2	4	0.000147	orf1 [Trichoderma harzianum]	tig00000377_pilon_C.paspali	7982	8629
g11261.t1	Y(0.907)	-	Cytoplasmiceffector	ref|WP_083291936.1|	215	326	132	194	69	32	3	7	0.083	hypothetical protein [Corynebacterium sp. HMSC08F01]	tig00000377_pilon_C.paspali	7982	8629
g11261.t1	Y(0.907)	-	Cytoplasmiceffector	ref|WP_092881245.1|	215	429	152	206	66	32	2	11	0.69	group II intron reverse transcriptase/maturase [Rhizobiales bacterium GAS188]	tig00000377_pilon_C.paspali	7982	8629
g11261.t1	Y(0.907)	-	Cytoplasmiceffector	ref|WP_092911402.1|	215	429	152	206	66	32	2	11	0.79	group II intron reverse transcriptase/maturase [Rhizobiales bacterium GAS191]	tig00000377_pilon_C.paspali	7982	8629
g11261.t1	Y(0.907)	-	Cytoplasmiceffector	ref|WP_103097567.1|	215	183	145	204	66	31	2	10	0.81	group II intron reverse transcriptase/maturase, partial [Tetragenococcus halophilus]	tig00000377_pilon_C.paspali	7982	8629
g11261.t1	Y(0.907)	-	Cytoplasmiceffector	tpg|HAH60008.1|	215	416	145	213	81	39	4	12	0.49	group II intron reverse transcriptase/maturase [Bacteroidales bacterium]	tig00000377_pilon_C.paspali	7982	8629
g11262.t1	Y(0.907)	-	Cytoplasmiceffector	emb|SED16593.1|	215	443	152	206	66	32	2	11	0.73	group II intron reverse transcriptase/maturase [Rhizobiales bacterium GAS191]	tig00000377_pilon_C.paspali	10768	11415
g11262.t1	Y(0.907)	-	Cytoplasmiceffector	gb|ABL63816.1|	215	662	152	215	68	28	3	9	0.046	putative retron-type reverse transcriptase [Neurospora intermedia]	tig00000377_pilon_C.paspali	10768	11415
g11262.t1	Y(0.907)	-	Cytoplasmiceffector	gb|KJS07122.1|	215	494	129	195	79	41	3	12	0.22	RNA-directed DNA polymerase (Reverse transcriptase) [Flavobacteriales bacterium BRH_c54]	tig00000377_pilon_C.paspali	10768	11415
g11262.t1	Y(0.907)	-	Cytoplasmiceffector	gb|OFT30604.1|	215	186	132	194	69	32	3	7	0.019	hypothetical protein HMPREF3171_03350 [Corynebacterium sp. HMSC08F01]	tig00000377_pilon_C.paspali	10768	11415
g11262.t1	Y(0.907)	-	Cytoplasmiceffector	ref|NP_862333.1|	215	605	153	213	61	26	2	4	0.000147	orf1 [Trichoderma harzianum]	tig00000377_pilon_C.paspali	10768	11415
g11262.t1	Y(0.907)	-	Cytoplasmiceffector	ref|WP_083291936.1|	215	326	132	194	69	32	3	7	0.083	hypothetical protein [Corynebacterium sp. HMSC08F01]	tig00000377_pilon_C.paspali	10768	11415
g11262.t1	Y(0.907)	-	Cytoplasmiceffector	ref|WP_092881245.1|	215	429	152	206	66	32	2	11	0.69	group II intron reverse transcriptase/maturase [Rhizobiales bacterium GAS188]	tig00000377_pilon_C.paspali	10768	11415
g11262.t1	Y(0.907)	-	Cytoplasmiceffector	ref|WP_092911402.1|	215	429	152	206	66	32	2	11	0.79	group II intron reverse transcriptase/maturase [Rhizobiales bacterium GAS191]	tig00000377_pilon_C.paspali	10768	11415
g11262.t1	Y(0.907)	-	Cytoplasmiceffector	ref|WP_103097567.1|	215	183	145	204	66	31	2	10	0.81	group II intron reverse transcriptase/maturase, partial [Tetragenococcus halophilus]	tig00000377_pilon_C.paspali	10768	11415
g11262.t1	Y(0.907)	-	Cytoplasmiceffector	tpg|HAH60008.1|	215	416	145	213	81	39	4	12	0.49	group II intron reverse transcriptase/maturase [Bacteroidales bacterium]	tig00000377_pilon_C.paspali	10768	11415
g11263.t1	Y(0.907)	-	Cytoplasmiceffector	emb|SED16593.1|	215	443	152	206	66	32	2	11	0.73	group II intron reverse transcriptase/maturase [Rhizobiales bacterium GAS191]	tig00000377_pilon_C.paspali	13553	14200
g11263.t1	Y(0.907)	-	Cytoplasmiceffector	gb|ABL63816.1|	215	662	152	215	68	28	3	9	0.046	putative retron-type reverse transcriptase [Neurospora intermedia]	tig00000377_pilon_C.paspali	13553	14200
g11263.t1	Y(0.907)	-	Cytoplasmiceffector	gb|KJS07122.1|	215	494	129	195	79	41	3	12	0.22	RNA-directed DNA polymerase (Reverse transcriptase) [Flavobacteriales bacterium BRH_c54]	tig00000377_pilon_C.paspali	13553	14200
g11263.t1	Y(0.907)	-	Cytoplasmiceffector	gb|OFT30604.1|	215	186	132	194	69	32	3	7	0.019	hypothetical protein HMPREF3171_03350 [Corynebacterium sp. HMSC08F01]	tig00000377_pilon_C.paspali	13553	14200
g11263.t1	Y(0.907)	-	Cytoplasmiceffector	ref|NP_862333.1|	215	605	153	213	61	26	2	4	0.000147	orf1 [Trichoderma harzianum]	tig00000377_pilon_C.paspali	13553	14200
g11263.t1	Y(0.907)	-	Cytoplasmiceffector	ref|WP_083291936.1|	215	326	132	194	69	32	3	7	0.083	hypothetical protein [Corynebacterium sp. HMSC08F01]	tig00000377_pilon_C.paspali	13553	14200
g11263.t1	Y(0.907)	-	Cytoplasmiceffector	ref|WP_092881245.1|	215	429	152	206	66	32	2	11	0.69	group II intron reverse transcriptase/maturase [Rhizobiales bacterium GAS188]	tig00000377_pilon_C.paspali	13553	14200
g11263.t1	Y(0.907)	-	Cytoplasmiceffector	ref|WP_092911402.1|	215	429	152	206	66	32	2	11	0.79	group II intron reverse transcriptase/maturase [Rhizobiales bacterium GAS191]	tig00000377_pilon_C.paspali	13553	14200
g11263.t1	Y(0.907)	-	Cytoplasmiceffector	ref|WP_103097567.1|	215	183	145	204	66	31	2	10	0.81	group II intron reverse transcriptase/maturase, partial [Tetragenococcus halophilus]	tig00000377_pilon_C.paspali	13553	14200
g11263.t1	Y(0.907)	-	Cytoplasmiceffector	tpg|HAH60008.1|	215	416	145	213	81	39	4	12	0.49	group II intron reverse transcriptase/maturase [Bacteroidales bacterium]	tig00000377_pilon_C.paspali	13553	14200
g11268.t1	Y(0.936)	-	Cytoplasmiceffector	emb|CZS90960.1|	193	254	36	190	164	82	4	9	1.4e-28	uncharacterized protein RAG0_01819 [Rhynchosporium agropyri]	tig00000383_pilon_C.paspali	7434	8193
g11268.t1	Y(0.936)	-	Cytoplasmiceffector	emb|CZT12678.1|	193	402	13	190	212	88	5	39	1.13e-33	uncharacterized protein RCO7_10933 [Rhynchosporium commune]	tig00000383_pilon_C.paspali	7434	8193
g11268.t1	Y(0.936)	-	Cytoplasmiceffector	gb|ESZ91267.1|	193	349	5	191	252	89	6	79	5.37e-25	hypothetical protein SBOR_8360 [Sclerotinia borealis F-4128]	tig00000383_pilon_C.paspali	7434	8193
g11268.t1	Y(0.936)	-	Cytoplasmiceffector	gb|KFY80898.1|	193	306	4	174	197	103	6	39	1.52e-06	hypothetical protein V499_00283 [Pseudogymnoascus sp. VKM F-103]	tig00000383_pilon_C.paspali	7434	8193
g11268.t1	Y(0.936)	-	Cytoplasmiceffector	gb|KFY87708.1|	193	339	100	171	72	46	0	0	5.05e-06	hypothetical protein V500_06808 [Pseudogymnoascus sp. VKM F-4518 (FW-2643)]	tig00000383_pilon_C.paspali	7434	8193
g11268.t1	Y(0.936)	-	Cytoplasmiceffector	gb|KFZ13313.1|	193	328	100	169	70	43	1	1	5.01e-06	hypothetical protein V502_06692 [Pseudogymnoascus sp. VKM F-4520 (FW-2644)]	tig00000383_pilon_C.paspali	7434	8193
g11268.t1	Y(0.936)	-	Cytoplasmiceffector	gb|OBT50901.1|	193	308	4	174	198	101	8	41	9.01e-07	hypothetical protein VE04_08347 [Pseudogymnoascus sp. 24MN13]	tig00000383_pilon_C.paspali	7434	8193
g11268.t1	Y(0.936)	-	Cytoplasmiceffector	gb|OBT60293.1|	193	344	2	187	240	104	5	59	7.16e-26	hypothetical protein VE03_10640 [Pseudogymnoascus sp. 23342-1-I1]	tig00000383_pilon_C.paspali	7434	8193
g11268.t1	Y(0.936)	-	Cytoplasmiceffector	gb|THV43897.1|	193	81	117	191	78	31	1	3	1.09e-20	hypothetical protein BGAL_0823g00010 [Botrytis galanthina]	tig00000383_pilon_C.paspali	7434	8193
g11268.t1	Y(0.936)	-	Cytoplasmiceffector	ref|XP_001587016.1|	193	359	1	191	241	103	3	50	1.39e-34	predicted protein [Sclerotinia sclerotiorum 1980 UF-70]	tig00000383_pilon_C.paspali	7434	8193
g11457.t1	Y(0.904)	-	Cytoplasmiceffector	gb|ESZ95671.1|	136	136	1	136	136	7	0	0	1.03e-85	60S ribosomal protein L26 [Sclerotinia borealis F-4128]	tig00002064_pilon_C.paspali	346116	346680
g11457.t1	Y(0.904)	-	Cytoplasmiceffector	gb|PQE07614.1|	136	136	1	136	136	4	0	0	2.34e-87	60S ribosomal L26 protein [Rutstroemia sp. NJR-2017a BBW]	tig00002064_pilon_C.paspali	346116	346680
g11457.t1	Y(0.904)	-	Cytoplasmiceffector	gb|PQE19496.1|	136	136	1	136	136	3	0	0	1.2e-87	60S ribosomal L26 protein [Rutstroemia sp. NJR-2017a WRK4]	tig00002064_pilon_C.paspali	346116	346680
g11457.t1	Y(0.904)	-	Cytoplasmiceffector	gb|TEY60686.1|	136	136	1	136	136	6	0	0	1.48e-86	hypothetical protein BOTCAL_0178g00100 [Botryotinia calthae]	tig00002064_pilon_C.paspali	346116	346680
g11457.t1	Y(0.904)	-	Cytoplasmiceffector	gb|TGO17041.1|	136	136	1	136	136	5	0	0	3.43e-87	hypothetical protein BTUL_0021g00380 [Botrytis tulipae]	tig00002064_pilon_C.paspali	346116	346680
g11457.t1	Y(0.904)	-	Cytoplasmiceffector	gb|TGO25709.1|	136	136	1	136	136	5	0	0	9.31e-87	hypothetical protein BPAE_0074g00180 [Botrytis paeoniae]	tig00002064_pilon_C.paspali	346116	346680
g11457.t1	Y(0.904)	-	Cytoplasmiceffector	gb|TGO76128.1|	136	136	1	136	136	5	0	0	3.67e-86	hypothetical protein BELL_0173g00150 [Botrytis elliptica]	tig00002064_pilon_C.paspali	346116	346680
g11457.t1	Y(0.904)	-	Cytoplasmiceffector	ref|XP_001556324.1|	136	136	1	136	136	4	0	0	5.74e-87	hypothetical protein BCIN_13g03600 [Botrytis cinerea B05.10]	tig00002064_pilon_C.paspali	346116	346680
g11457.t1	Y(0.904)	-	Cytoplasmiceffector	ref|XP_001596288.1|	136	136	1	136	136	7	0	0	2.67e-85	60S ribosomal protein L26 [Sclerotinia sclerotiorum 1980 UF-70]	tig00002064_pilon_C.paspali	346116	346680
g11457.t1	Y(0.904)	-	Cytoplasmiceffector	ref|XP_018066593.1|	136	136	1	136	136	9	0	0	4.24e-85	putative 60S ribosomal protein L26-2 [Phialocephala scopiformis]	tig00002064_pilon_C.paspali	346116	346680
g11578.t1	Y(0.942)	-	Cytoplasmiceffector	gb|KJK65399.1|	111	104	2	101	100	34	1	1	1.68e-39	Stress responsive A/B Barrel Domain [Aspergillus parasiticus SU-1]	tig00002064_pilon_C.paspali	700733	701167
g11578.t1	Y(0.942)	-	Cytoplasmiceffector	gb|PIG83575.1|	111	104	2	101	100	34	1	1	2.46e-39	stress responsive A/B barrel domain protein [Aspergillus arachidicola]	tig00002064_pilon_C.paspali	700733	701167
g11578.t1	Y(0.942)	-	Cytoplasmiceffector	gb|PQE19582.1|	111	109	1	109	109	17	0	0	2.42e-63	stress responsive A B barrel domain protein [Rutstroemia sp. NJR-2017a WRK4]	tig00002064_pilon_C.paspali	700733	701167
g11578.t1	Y(0.942)	-	Cytoplasmiceffector	gb|PQE26947.1|	111	109	1	109	109	13	0	0	3.94e-66	stress responsive A B barrel domain protein [Rutstroemia sp. NJR-2017a BVV2]	tig00002064_pilon_C.paspali	700733	701167
g11578.t1	Y(0.942)	-	Cytoplasmiceffector	gb|PQE27658.1|	111	111	1	107	107	16	0	0	5.69e-63	stress responsive A B barrel domain protein [Rutstroemia sp. NJR-2017a BBW]	tig00002064_pilon_C.paspali	700733	701167
g11578.t1	Y(0.942)	-	Cytoplasmiceffector	gb|PYH91184.1|	111	109	1	106	106	46	0	0	4.79e-39	stress responsive A/B barrel domain protein [Aspergillus ellipticus CBS 707.79]	tig00002064_pilon_C.paspali	700733	701167
g11578.t1	Y(0.942)	-	Cytoplasmiceffector	ref|XP_002374176.1|	111	104	2	101	100	34	1	1	9.91e-40	stress responsive A/B barrel domain protein [Aspergillus flavus NRRL3357]	tig00002064_pilon_C.paspali	700733	701167
g11578.t1	Y(0.942)	-	Cytoplasmiceffector	ref|XP_015401266.1|	111	108	1	104	104	42	0	0	5.72e-39	stress responsive A/B barrel domain protein [Aspergillus nomius NRRL 13137]	tig00002064_pilon_C.paspali	700733	701167
g11578.t1	Y(0.942)	-	Cytoplasmiceffector	ref|XP_022384847.1|	111	104	2	101	100	34	1	1	2.93e-39	stress responsive A/B barrel domain protein [Aspergillus bombycis]	tig00002064_pilon_C.paspali	700733	701167
g11578.t1	Y(0.942)	-	Cytoplasmiceffector	ref|XP_659583.1|	111	104	2	101	100	32	1	1	1.08e-39	hypothetical protein AN1979.2 [Aspergillus nidulans FGSC A4]	tig00002064_pilon_C.paspali	700733	701167
g11588.t1	Y(0.988)	-	Cytoplasmiceffector	gb|EKG08999.1|	154	1423	2	146	147	102	2	3	2.02e-08	Integrase catalytic core, partial [Macrophomina phaseolina MS6]	tig00002064_pilon_C.paspali	727933	728397
g11588.t1	Y(0.988)	-	Cytoplasmiceffector	gb|ELR08111.1|	154	167	5	124	123	78	3	4	4.35e-09	hypothetical protein GMDG_02938 [Pseudogymnoascus destructans 20631-21]	tig00002064_pilon_C.paspali	727933	728397
g11588.t1	Y(0.988)	-	Cytoplasmiceffector	gb|OCK80083.1|	154	250	6	145	150	85	4	18	4.92e-09	hypothetical protein K432DRAFT_53460 [Lepidopterella palustris CBS 459.81]	tig00002064_pilon_C.paspali	727933	728397
g11588.t1	Y(0.988)	-	Cytoplasmiceffector	gb|OCK89836.1|	154	231	3	154	156	110	2	5	3.98e-09	hypothetical protein K441DRAFT_667205, partial [Cenococcum geophilum 1.58]	tig00002064_pilon_C.paspali	727933	728397
g11588.t1	Y(0.988)	-	Cytoplasmiceffector	gb|OCK98612.1|	154	231	3	154	156	109	2	5	3.86e-09	hypothetical protein K441DRAFT_653854, partial [Cenococcum geophilum 1.58]	tig00002064_pilon_C.paspali	727933	728397
g11588.t1	Y(0.988)	-	Cytoplasmiceffector	gb|OXV05611.1|	154	357	5	146	144	101	3	4	1.03e-07	hypothetical protein Egran_06621, partial [Elaphomyces granulatus]	tig00002064_pilon_C.paspali	727933	728397
g11588.t1	Y(0.988)	-	Cytoplasmiceffector	gb|PSN59591.1|	154	290	5	146	147	102	3	9	1.11e-09	hypothetical protein BS50DRAFT_507961, partial [Corynespora cassiicola Philippines]	tig00002064_pilon_C.paspali	727933	728397
g11588.t1	Y(0.988)	-	Cytoplasmiceffector	gb|RDL36452.1|	154	1562	7	154	151	104	2	4	4.1e-13	hypothetical protein BP5553_05804 [Phialophora cf. hyalina BP 5553]	tig00002064_pilon_C.paspali	727933	728397
g11588.t1	Y(0.988)	-	Cytoplasmiceffector	ref|XP_001211071.1|	154	1292	5	154	156	106	3	7	1.31e-09	predicted protein [Aspergillus terreus NIH2624]	tig00002064_pilon_C.paspali	727933	728397
g11588.t1	Y(0.988)	-	Cytoplasmiceffector	ref|XP_001216587.1|	154	1407	5	154	156	106	3	7	1.3e-09	predicted protein [Aspergillus terreus NIH2624]	tig00002064_pilon_C.paspali	727933	728397
g11642.t1	Y(0.957)	-	Cytoplasmiceffector	gb|KFX89678.1|	87	342	29	84	56	22	1	2	2.49e-11	hypothetical protein V490_06866 [Pseudogymnoascus sp. VKM F-3557]	tig00002064_pilon_C.paspali	890571	890953
g11642.t1	Y(0.957)	-	Cytoplasmiceffector	gb|KFZ17649.1|	87	334	29	84	56	23	1	2	2.13e-10	hypothetical protein V501_01617 [Pseudogymnoascus sp. VKM F-4519 (FW-2642)]	tig00002064_pilon_C.paspali	890571	890953
g11642.t1	Y(0.957)	-	Cytoplasmiceffector	gb|KJZ68675.1|	87	380	29	87	59	26	1	3	4.31e-10	hypothetical protein HIM_11931 [Hirsutella minnesotensis 3608]	tig00002064_pilon_C.paspali	890571	890953
g11642.t1	Y(0.957)	-	Cytoplasmiceffector	gb|KJZ69505.1|	87	363	29	87	59	26	1	3	4.48e-10	hypothetical protein HIM_11102 [Hirsutella minnesotensis 3608]	tig00002064_pilon_C.paspali	890571	890953
g11642.t1	Y(0.957)	-	Cytoplasmiceffector	gb|KJZ70201.1|	87	363	29	87	59	26	1	3	4.53e-10	hypothetical protein HIM_10424 [Hirsutella minnesotensis 3608]	tig00002064_pilon_C.paspali	890571	890953
g11642.t1	Y(0.957)	-	Cytoplasmiceffector	gb|KJZ78887.1|	87	344	29	87	59	25	1	3	1.09e-10	hypothetical protein HIM_01660 [Hirsutella minnesotensis 3608]	tig00002064_pilon_C.paspali	890571	890953
g11642.t1	Y(0.957)	-	Cytoplasmiceffector	gb|OCK89634.1|	87	153	29	87	59	28	1	3	1.42e-08	hypothetical protein K441DRAFT_582749, partial [Cenococcum geophilum 1.58]	tig00002064_pilon_C.paspali	890571	890953
g11642.t1	Y(0.957)	-	Cytoplasmiceffector	gb|PNP57750.1|	87	188	29	87	59	23	1	3	8.06e-12	hypothetical protein FNYG_15181 [Fusarium nygamai]	tig00002064_pilon_C.paspali	890571	890953
g11642.t1	Y(0.957)	-	Cytoplasmiceffector	gb|RFU30684.1|	87	165	29	86	58	26	1	3	1.23e-08	hypothetical protein B7463_g5645, partial [Scytalidium lignicola]	tig00002064_pilon_C.paspali	890571	890953
g11642.t1	Y(0.957)	-	Cytoplasmiceffector	ref|XP_008601671.1|	87	1119	29	87	59	26	1	3	2.99e-11	kinesin related protein 1 [Beauveria bassiana ARSEF 2860]	tig00002064_pilon_C.paspali	890571	890953
g11680.t1	Y(0.906)	-	Cytoplasmiceffector	gb|RZV57549.1|	88	323	16	69	55	28	2	3	8.3	hypothetical protein EX330_09540 [Candidatus Brocadia sp. BROELEC01]	tig00002064_pilon_C.paspali	989890	990156
g11680.t1	Y(0.906)	-	Cytoplasmiceffector	ref|WP_109702523.1|	88	300	11	53	43	22	1	1	5.4	GNAT family N-acetyltransferase [Gammaproteobacteria bacterium ESL0073]	tig00002064_pilon_C.paspali	989890	990156
g11680.t1	Y(0.906)	-	Cytoplasmiceffector	ref|WP_127162484.1|	88	300	11	53	43	22	1	1	5.1	GNAT family N-acetyltransferase [Pseudomonas sp. QZS01]	tig00002064_pilon_C.paspali	989890	990156
g11754.t1	Y(0.903)	-	Cytoplasmiceffector	gb|PQE27570.1|	318	264	1	247	249	7	2	2	3.44e-162	UBX domain protein [Rutstroemia sp. NJR-2017a BBW]	tig00002064_pilon_C.paspali	1362806	1363975
g11754.t1	Y(0.903)	-	Cytoplasmiceffector	gb|PQE30495.1|	318	320	1	318	320	18	2	2	0	UBA TS-N domain-containing protein [Rutstroemia sp. NJR-2017a WRK4]	tig00002064_pilon_C.paspali	1362806	1363975
g11754.t1	Y(0.903)	-	Cytoplasmiceffector	gb|TEY33605.1|	318	317	1	317	320	73	3	7	6.11e-158	hypothetical protein BOTCAL_0674g00050 [Botryotinia calthae]	tig00002064_pilon_C.paspali	1362806	1363975
g11754.t1	Y(0.903)	-	Cytoplasmiceffector	gb|TGO15250.1|	318	317	1	317	320	71	3	7	6.55e-159	hypothetical protein BTUL_0042g00200 [Botrytis tulipae]	tig00002064_pilon_C.paspali	1362806	1363975
g11754.t1	Y(0.903)	-	Cytoplasmiceffector	gb|TGO35030.1|	318	317	1	317	320	72	3	7	1.17e-158	hypothetical protein BHYA_0173g00250 [Botrytis hyacinthi]	tig00002064_pilon_C.paspali	1362806	1363975
g11754.t1	Y(0.903)	-	Cytoplasmiceffector	gb|TGO60755.1|	318	317	1	317	320	73	3	7	4.17e-158	hypothetical protein BCON_0033g00670 [Botryotinia convoluta]	tig00002064_pilon_C.paspali	1362806	1363975
g11754.t1	Y(0.903)	-	Cytoplasmiceffector	gb|TGO92198.1|	318	317	1	317	320	72	3	7	1.43e-158	hypothetical protein BPOR_0008g00380 [Botrytis porri]	tig00002064_pilon_C.paspali	1362806	1363975
g11754.t1	Y(0.903)	-	Cytoplasmiceffector	gb|THV44263.1|	318	317	1	317	320	73	3	7	9.58e-158	hypothetical protein BGAL_0686g00020 [Botrytis galanthina]	tig00002064_pilon_C.paspali	1362806	1363975
g11754.t1	Y(0.903)	-	Cytoplasmiceffector	ref|XP_001557566.1|	318	317	1	317	320	72	3	7	1.28e-158	hypothetical protein BCIN_04g04420 [Botrytis cinerea B05.10]	tig00002064_pilon_C.paspali	1362806	1363975
g11754.t1	Y(0.903)	-	Cytoplasmiceffector	ref|XP_001588193.1|	318	318	1	317	320	79	2	6	1.93e-159	hypothetical protein SS1G_10639 [Sclerotinia sclerotiorum 1980 UF-70]	tig00002064_pilon_C.paspali	1362806	1363975
g11795.t1	Y(0.983)	-	Cytoplasmiceffector	gb|EYU20339.1|	70	209	8	55	49	29	1	1	4.1	hypothetical protein MIMGU_mgv1a022725mg, partial [Erythranthe guttata]	tig00002064_pilon_C.paspali	1469652	1469916
g11795.t1	Y(0.983)	-	Cytoplasmiceffector	gb|PLY97810.1|	70	223	8	46	39	23	0	0	2	hypothetical protein LSAT_6X13921 [Lactuca sativa]	tig00002064_pilon_C.paspali	1469652	1469916
g11795.t1	Y(0.983)	-	Cytoplasmiceffector	ref|XP_012857781.1|	70	217	8	55	49	29	1	1	4.6	PREDICTED: uncharacterized protein LOC105977067 [Erythranthe guttata]	tig00002064_pilon_C.paspali	1469652	1469916
g11866.t1	Y(0.958)	-	Cytoplasmiceffector	gb|ROJ36099.1|	118	1108	40	114	75	51	1	2	0.58	Piezo-type mechanosensitive ion channel component 1 [Anabarilius grahami]	tig00002064_pilon_C.paspali	1637585	1638416
g11866.t1	Y(0.958)	-	Cytoplasmiceffector	ref|WP_114752733.1|	118	350	15	111	106	59	5	12	2	cobalamin-binding protein [Negadavirga sp. SW125]	tig00002064_pilon_C.paspali	1637585	1638416
g11866.t1	Y(0.958)	-	Cytoplasmiceffector	ref|XP_016101354.1|	118	2336	40	114	75	52	1	2	7.2	PREDICTED: piezo-type mechanosensitive ion channel component 1-like [Sinocyclocheilus grahami]	tig00002064_pilon_C.paspali	1637585	1638416
g11866.t1	Y(0.958)	-	Cytoplasmiceffector	ref|XP_016147715.1|	118	2044	40	114	75	52	1	2	3.5	PREDICTED: piezo-type mechanosensitive ion channel component 1-like [Sinocyclocheilus grahami]	tig00002064_pilon_C.paspali	1637585	1638416
g11866.t1	Y(0.958)	-	Cytoplasmiceffector	ref|XP_016338085.1|	118	2617	11	114	107	76	2	5	0.26	PREDICTED: piezo-type mechanosensitive ion channel component 1-like [Sinocyclocheilus anshuiensis]	tig00002064_pilon_C.paspali	1637585	1638416
g11866.t1	Y(0.958)	-	Cytoplasmiceffector	ref|XP_016378465.1|	118	2416	40	114	75	52	1	2	3.6	PREDICTED: piezo-type mechanosensitive ion channel component 1-like [Sinocyclocheilus rhinocerous]	tig00002064_pilon_C.paspali	1637585	1638416
g11866.t1	Y(0.958)	-	Cytoplasmiceffector	ref|XP_016396376.1|	118	2537	40	114	75	51	1	2	2.2	PREDICTED: piezo-type mechanosensitive ion channel component 1-like [Sinocyclocheilus rhinocerous]	tig00002064_pilon_C.paspali	1637585	1638416
g11866.t1	Y(0.958)	-	Cytoplasmiceffector	ref|XP_026070685.1|	118	2532	40	114	75	52	1	2	5.9	piezo-type mechanosensitive ion channel component 1-like isoform X1 [Carassius auratus]	tig00002064_pilon_C.paspali	1637585	1638416
g11866.t1	Y(0.958)	-	Cytoplasmiceffector	ref|XP_026070687.1|	118	2531	40	114	75	52	1	2	5.9	piezo-type mechanosensitive ion channel component 1-like isoform X2 [Carassius auratus]	tig00002064_pilon_C.paspali	1637585	1638416
g11866.t1	Y(0.958)	-	Cytoplasmiceffector	ref|XP_026070688.1|	118	2524	40	114	75	52	1	2	5.9	piezo-type mechanosensitive ion channel component 1-like isoform X3 [Carassius auratus]	tig00002064_pilon_C.paspali	1637585	1638416
g11906.t1	Y(0.926)	-	Cytoplasmiceffector	gb|APA12524.1|	184	185	1	183	183	9	0	0	2.62e-128	hypothetical protein sscle_09g072940 [Sclerotinia sclerotiorum 1980 UF-70]	tig00002064_pilon_C.paspali	1738341	1739092
g11906.t1	Y(0.926)	-	Cytoplasmiceffector	gb|ESZ92567.1|	184	185	1	183	183	9	0	0	2.96e-128	NEDD8-conjugating enzyme UBC12 [Sclerotinia borealis F-4128]	tig00002064_pilon_C.paspali	1738341	1739092
g11906.t1	Y(0.926)	-	Cytoplasmiceffector	gb|PQE07575.1|	184	184	1	184	184	2	0	0	1.71e-133	NEDD8-conjugating enzyme UBC12 protein [Rutstroemia sp. NJR-2017a BBW]	tig00002064_pilon_C.paspali	1738341	1739092
g11906.t1	Y(0.926)	-	Cytoplasmiceffector	gb|PQE19460.1|	184	183	6	184	179	4	0	0	1.63e-127	NEDD8-conjugating enzyme UBC12 protein [Rutstroemia sp. NJR-2017a WRK4]	tig00002064_pilon_C.paspali	1738341	1739092
g11906.t1	Y(0.926)	-	Cytoplasmiceffector	gb|PQE26811.1|	184	289	4	184	181	5	0	0	1.96e-127	NEDD8-conjugating enzyme UBC12 protein [Rutstroemia sp. NJR-2017a BVV2]	tig00002064_pilon_C.paspali	1738341	1739092
g11906.t1	Y(0.926)	-	Cytoplasmiceffector	gb|TGO40837.1|	184	185	1	183	183	10	0	0	1.23e-127	hypothetical protein BHYA_0030g00030 [Botrytis hyacinthi]	tig00002064_pilon_C.paspali	1738341	1739092
g11906.t1	Y(0.926)	-	Cytoplasmiceffector	gb|TGO46914.1|	184	185	1	183	183	11	0	0	2.3e-127	hypothetical protein BOTNAR_0556g00040 [Botryotinia narcissicola]	tig00002064_pilon_C.paspali	1738341	1739092
g11906.t1	Y(0.926)	-	Cytoplasmiceffector	gb|TGO81838.1|	184	185	1	183	183	10	0	0	1.59e-127	hypothetical protein BPOR_0998g00020 [Botrytis porri]	tig00002064_pilon_C.paspali	1738341	1739092
g11906.t1	Y(0.926)	-	Cytoplasmiceffector	ref|XP_001557192.1|	184	185	1	183	183	10	0	0	9.37e-128	Bcubc12 [Botrytis cinerea B05.10]	tig00002064_pilon_C.paspali	1738341	1739092
g11906.t1	Y(0.926)	-	Cytoplasmiceffector	ref|XP_001595767.1|	184	197	1	183	183	9	1	4	1.08e-122	hypothetical protein SS1G_03856 [Sclerotinia sclerotiorum 1980 UF-70]	tig00002064_pilon_C.paspali	1738341	1739092
g11925.t1	Y(0.916)	-	Cytoplasmiceffector	gb|EKG20434.1|	134	606	26	127	109	54	2	7	4.36e-18	hypothetical protein MPH_02244 [Macrophomina phaseolina MS6]	tig00002064_pilon_C.paspali	1791514	1791918
g11925.t1	Y(0.916)	-	Cytoplasmiceffector	gb|EQB57145.1|	134	543	3	129	134	68	5	14	4.77e-15	hypothetical protein CGLO_02782 [Colletotrichum gloeosporioides Cg-14]	tig00002064_pilon_C.paspali	1791514	1791918
g11925.t1	Y(0.916)	-	Cytoplasmiceffector	gb|KIN02978.1|	134	198	24	121	105	53	2	7	1.44e-19	hypothetical protein OIDMADRAFT_65754, partial [Oidiodendron maius Zn]	tig00002064_pilon_C.paspali	1791514	1791918
g11925.t1	Y(0.916)	-	Cytoplasmiceffector	gb|KIN03153.1|	134	212	2	127	134	69	4	9	1.51e-22	hypothetical protein OIDMADRAFT_120255, partial [Oidiodendron maius Zn]	tig00002064_pilon_C.paspali	1791514	1791918
g11925.t1	Y(0.916)	-	Cytoplasmiceffector	gb|OKO99160.1|	134	567	25	119	104	49	4	12	5.76e-11	hypothetical protein PENSUB_8547 [Penicillium subrubescens]	tig00002064_pilon_C.paspali	1791514	1791918
g11925.t1	Y(0.916)	-	Cytoplasmiceffector	gb|RKU49558.1|	134	615	13	127	124	69	2	9	1.66e-13	hypothetical protein DL546_009245 [Coniochaeta pulveracea]	tig00002064_pilon_C.paspali	1791514	1791918
g11925.t1	Y(0.916)	-	Cytoplasmiceffector	gb|RYP00514.1|	134	618	30	127	104	65	2	6	1.98e-09	hypothetical protein DL764_006483 [Monosporascus ibericus]	tig00002064_pilon_C.paspali	1791514	1791918
g11925.t1	Y(0.916)	-	Cytoplasmiceffector	ref|XP_001245596.1|	134	263	12	122	115	61	4	12	7.02e-10	hypothetical protein CIMG_05037 [Coccidioides immitis RS]	tig00002064_pilon_C.paspali	1791514	1791918
g11925.t1	Y(0.916)	-	Cytoplasmiceffector	ref|XP_003071321.1|	134	263	12	122	115	61	4	12	5.91e-10	hypothetical protein CPC735_068580 [Coccidioides posadasii C735 delta SOWgp]	tig00002064_pilon_C.paspali	1791514	1791918
g11925.t1	Y(0.916)	-	Cytoplasmiceffector	ref|XP_022467954.1|	134	566	12	129	125	65	5	16	3.92e-10	hypothetical protein CORC01_13919 [Colletotrichum orchidophilum]	tig00002064_pilon_C.paspali	1791514	1791918
g12070.t1	Y(0.918)	-	Cytoplasmiceffector	emb|CCD53465.1|	223	541	1	213	214	65	1	1	5.27e-84	hypothetical protein BofuT4_P135100.1 [Botrytis cinerea T4]	tig00002064_pilon_C.paspali	2229557	2230228
g12070.t1	Y(0.918)	-	Cytoplasmiceffector	gb|EGD99964.1|	223	208	1	218	218	66	2	15	5.85e-86	hypothetical protein TESG_07292 [Trichophyton tonsurans CBS 112818]	tig00002064_pilon_C.paspali	2229557	2230228
g12070.t1	Y(0.918)	-	Cytoplasmiceffector	gb|KFY03079.1|	223	1513	1	213	214	61	1	1	6.12e-90	hypothetical protein V490_00302 [Pseudogymnoascus sp. VKM F-3557]	tig00002064_pilon_C.paspali	2229557	2230228
g12070.t1	Y(0.918)	-	Cytoplasmiceffector	gb|KFY17804.1|	223	1300	1	213	214	64	1	1	1.11e-89	hypothetical protein V492_00380 [Pseudogymnoascus sp. VKM F-4246]	tig00002064_pilon_C.paspali	2229557	2230228
g12070.t1	Y(0.918)	-	Cytoplasmiceffector	gb|KFY47124.1|	223	985	1	213	214	64	1	1	1.93e-90	hypothetical protein V494_00145 [Pseudogymnoascus sp. VKM F-4513 (FW-928)]	tig00002064_pilon_C.paspali	2229557	2230228
g12070.t1	Y(0.918)	-	Cytoplasmiceffector	gb|KFY96263.1|	223	1384	1	213	213	64	0	0	2.09e-91	hypothetical protein V500_02545 [Pseudogymnoascus sp. VKM F-4518 (FW-2643)]	tig00002064_pilon_C.paspali	2229557	2230228
g12070.t1	Y(0.918)	-	Cytoplasmiceffector	gb|MAD81890.1|	223	217	1	220	220	70	2	4	6.99e-93	hypothetical protein [Deltaproteobacteria bacterium]	tig00002064_pilon_C.paspali	2229557	2230228
g12070.t1	Y(0.918)	-	Cytoplasmiceffector	gb|OBT44213.1|	223	272	1	213	214	68	1	1	1.23e-94	hypothetical protein VE00_05407 [Pseudogymnoascus sp. WSF 3629]	tig00002064_pilon_C.paspali	2229557	2230228
g12070.t1	Y(0.918)	-	Cytoplasmiceffector	gb|PVH68023.1|	223	1051	1	213	213	64	0	0	4.66e-94	TPR-like protein [Cadophora sp. DSE1049]	tig00002064_pilon_C.paspali	2229557	2230228
g12070.t1	Y(0.918)	-	Cytoplasmiceffector	ref|XP_018140500.1|	223	1371	1	217	218	73	1	1	1.68e-85	G-protein beta WD- 40 repeats containing protein [Pochonia chlamydosporia 170]	tig00002064_pilon_C.paspali	2229557	2230228
g12106.t1	Y(0.968)	-	Cytoplasmiceffector	gb|KFY72861.1|	148	239	1	148	184	54	2	36	8.49e-52	hypothetical protein V499_07022 [Pseudogymnoascus sp. VKM F-103]	tig00002064_pilon_C.paspali	2308231	2308783
g12106.t1	Y(0.968)	-	Cytoplasmiceffector	gb|KFZ08379.1|	148	239	1	148	184	53	2	36	4.56e-52	hypothetical protein V501_05964 [Pseudogymnoascus sp. VKM F-4519 (FW-2642)]	tig00002064_pilon_C.paspali	2308231	2308783
g12106.t1	Y(0.968)	-	Cytoplasmiceffector	gb|OBT42014.1|	148	239	1	148	184	53	2	36	3.26e-52	hypothetical protein VE00_06636 [Pseudogymnoascus sp. WSF 3629]	tig00002064_pilon_C.paspali	2308231	2308783
g12106.t1	Y(0.968)	-	Cytoplasmiceffector	gb|OBT84884.1|	148	217	1	148	163	53	3	16	1.19e-52	hypothetical protein VE02_06538 [Pseudogymnoascus sp. 03VT05]	tig00002064_pilon_C.paspali	2308231	2308783
g12106.t1	Y(0.968)	-	Cytoplasmiceffector	gb|PIG79909.1|	148	239	1	147	175	54	2	28	4.03e-51	FMN-binding split barrel [Aspergillus arachidicola]	tig00002064_pilon_C.paspali	2308231	2308783
g12106.t1	Y(0.968)	-	Cytoplasmiceffector	gb|RDL31371.1|	148	242	1	148	184	40	2	36	1.84e-62	FMN-binding split barrel [Phialophora cf. hyalina BP 5553]	tig00002064_pilon_C.paspali	2308231	2308783
g12106.t1	Y(0.968)	-	Cytoplasmiceffector	gb|TAQ88016.1|	148	242	1	148	184	44	2	36	1.79e-59	hypothetical protein B7494_g3638 [Chlorociboria aeruginascens]	tig00002064_pilon_C.paspali	2308231	2308783
g12106.t1	Y(0.968)	-	Cytoplasmiceffector	ref|XP_008085470.1|	148	239	1	148	184	50	3	37	2.42e-54	FMN-binding split barrel [Glarea lozoyensis ATCC 20868]	tig00002064_pilon_C.paspali	2308231	2308783
g12106.t1	Y(0.968)	-	Cytoplasmiceffector	ref|XP_018134847.1|	148	239	1	148	184	54	2	36	9.88e-52	hypothetical protein VE01_00873 [Pseudogymnoascus verrucosus]	tig00002064_pilon_C.paspali	2308231	2308783
g12106.t1	Y(0.968)	-	Cytoplasmiceffector	ref|XP_024726785.1|	148	242	1	148	184	46	2	36	5.51e-58	hypothetical protein K444DRAFT_711937 [Meliniomyces bicolor E]	tig00002064_pilon_C.paspali	2308231	2308783
g12190.t1	Y(0.961)	-	Cytoplasmiceffector	ref|WP_076665635.1|	102	272	33	102	70	28	3	15	1.2	DUF2249 domain-containing protein [Pontibacter indicus]	tig00002064_pilon_C.paspali	2585009	2585370
g12222.t1	Y(0.966)	-	Cytoplasmiceffector	gb|AHV78243.1|	214	213	1	213	213	33	1	1	2.84e-128	glutathione-S-transferase [Lasiodiplodia theobromae]	tig00002064_pilon_C.paspali	2669355	2670131
g12222.t1	Y(0.966)	-	Cytoplasmiceffector	gb|OBT63934.1|	214	214	1	214	214	34	0	0	1.56e-131	hypothetical protein VE03_05922 [Pseudogymnoascus sp. 23342-1-I1]	tig00002064_pilon_C.paspali	2669355	2670131
g12222.t1	Y(0.966)	-	Cytoplasmiceffector	gb|OCK85503.1|	214	212	1	210	211	44	1	1	8.37e-116	glutathione S-transferase [Lepidopterella palustris CBS 459.81]	tig00002064_pilon_C.paspali	2669355	2670131
g12222.t1	Y(0.966)	-	Cytoplasmiceffector	gb|OMP82713.1|	214	204	10	213	204	36	1	1	1.11e-120	Glutathione S-transferase PARB [Diplodia seriata]	tig00002064_pilon_C.paspali	2669355	2670131
g12222.t1	Y(0.966)	-	Cytoplasmiceffector	gb|PLN83293.1|	214	204	10	214	205	32	1	1	1.94e-123	glutathione S-transferase [Aspergillus taichungensis]	tig00002064_pilon_C.paspali	2669355	2670131
g12222.t1	Y(0.966)	-	Cytoplasmiceffector	gb|PQE03118.1|	214	214	1	213	213	32	0	0	1.86e-130	Glutathione S-transferase protein [Rutstroemia sp. NJR-2017a BBW]	tig00002064_pilon_C.paspali	2669355	2670131
g12222.t1	Y(0.966)	-	Cytoplasmiceffector	gb|PQE29798.1|	214	214	1	213	213	32	0	0	3.25e-129	Glutathione S-transferase protein [Rutstroemia sp. NJR-2017a WRK4]	tig00002064_pilon_C.paspali	2669355	2670131
g12222.t1	Y(0.966)	-	Cytoplasmiceffector	ref|XP_001208442.1|	214	214	1	213	213	41	0	0	9.95e-128	predicted protein [Aspergillus terreus NIH2624]	tig00002064_pilon_C.paspali	2669355	2670131
g12222.t1	Y(0.966)	-	Cytoplasmiceffector	ref|XP_014550034.1|	214	214	1	214	214	54	0	0	2.16e-117	hypothetical protein COCVIDRAFT_116750 [Bipolaris victoriae FI3]	tig00002064_pilon_C.paspali	2669355	2670131
g12222.t1	Y(0.966)	-	Cytoplasmiceffector	ref|XP_024695238.1|	214	214	1	213	213	41	0	0	9.12e-128	glutathione S-transferase [Aspergillus campestris IBT 28561]	tig00002064_pilon_C.paspali	2669355	2670131
g12251.t1	Y(0.953)	-	Cytoplasmiceffector	emb|CZR54242.1|	94	94	1	93	93	21	0	0	8.1e-47	related to F1F0-ATP synthase subunit E [Phialocephala subalpina]	tig00002064_pilon_C.paspali	2740454	2740985
g12251.t1	Y(0.953)	-	Cytoplasmiceffector	gb|PBP26226.1|	94	94	1	93	93	22	0	0	1.5e-46	oligosaccharyl transferase stt3 subunit [Diplocarpon rosae]	tig00002064_pilon_C.paspali	2740454	2740985
g12251.t1	Y(0.953)	-	Cytoplasmiceffector	gb|PMD41769.1|	94	94	1	94	94	23	0	0	4.4e-45	putative ATP synthase subunit E, mitochondrial [Hyaloscypha variabilis F]	tig00002064_pilon_C.paspali	2740454	2740985
g12251.t1	Y(0.953)	-	Cytoplasmiceffector	gb|PQE09868.1|	94	94	1	94	94	8	0	0	2.12e-56	hypothetical protein CJF30_00010349 [Rutstroemia sp. NJR-2017a BBW]	tig00002064_pilon_C.paspali	2740454	2740985
g12251.t1	Y(0.953)	-	Cytoplasmiceffector	gb|RDW84402.1|	94	93	1	90	90	19	0	0	2.09e-45	hypothetical protein BP6252_01992 [Coleophoma cylindrospora]	tig00002064_pilon_C.paspali	2740454	2740985
g12251.t1	Y(0.953)	-	Cytoplasmiceffector	gb|TGO16737.1|	94	93	1	93	93	18	0	0	5.2e-45	hypothetical protein BTUL_0024g00050 [Botrytis tulipae]	tig00002064_pilon_C.paspali	2740454	2740985
g12251.t1	Y(0.953)	-	Cytoplasmiceffector	gb|THV53109.1|	94	93	1	93	93	17	0	0	1.22e-45	hypothetical protein BGAL_0059g00190 [Botrytis galanthina]	tig00002064_pilon_C.paspali	2740454	2740985
g12251.t1	Y(0.953)	-	Cytoplasmiceffector	ref|XP_001558877.1|	94	93	1	93	93	17	0	0	5.2e-45	hypothetical protein BCIN_02g02250 [Botrytis cinerea B05.10]	tig00002064_pilon_C.paspali	2740454	2740985
g12251.t1	Y(0.953)	-	Cytoplasmiceffector	ref|XP_001597659.1|	94	93	1	93	93	20	0	0	3.26e-47	predicted protein [Sclerotinia sclerotiorum 1980 UF-70]	tig00002064_pilon_C.paspali	2740454	2740985
g12251.t1	Y(0.953)	-	Cytoplasmiceffector	ref|XP_024726733.1|	94	94	1	93	93	20	0	0	2.1e-46	putative ATP synthase subunit E, mitochondrial [Meliniomyces bicolor E]	tig00002064_pilon_C.paspali	2740454	2740985
g12293.t1	Y(0.951)	Y(0.574)	Cytoplasmic/apoplasticeffector	gb|AFA35192.1|	116	211	10	77	68	46	2	3	7.6	integrase, partial [uncultured bacterium]	tig00002064_pilon_C.paspali	2841050	2841400
g12293.t1	Y(0.951)	Y(0.574)	Cytoplasmic/apoplasticeffector	gb|AFA35200.1|	116	211	10	77	68	46	2	3	8	integrase, partial [uncultured bacterium]	tig00002064_pilon_C.paspali	2841050	2841400
g12293.t1	Y(0.951)	Y(0.574)	Cytoplasmic/apoplasticeffector	ref|WP_006589082.1|	116	765	28	101	76	53	1	2	8.2	phage tail tape measure protein [Bartonella birtlesii]	tig00002064_pilon_C.paspali	2841050	2841400
g12293.t1	Y(0.951)	Y(0.574)	Cytoplasmic/apoplasticeffector	ref|WP_017196250.1|	116	765	28	101	76	53	1	2	8.3	phage tail tape measure protein [Bartonella birtlesii]	tig00002064_pilon_C.paspali	2841050	2841400
g12293.t1	Y(0.951)	Y(0.574)	Cytoplasmic/apoplasticeffector	ref|WP_097677744.1|	116	683	2	99	100	51	3	17	8.7	TonB-dependent receptor [Bacteroides congonensis]	tig00002064_pilon_C.paspali	2841050	2841400
g12336.t1	Y(0.97)	-	Cytoplasmiceffector	gb|ESZ98612.1|	192	192	1	192	192	20	0	0	2.67e-125	inorganic phosphate transporter [Sclerotinia borealis F-4128]	tig00002064_pilon_C.paspali	2982517	2983216
g12336.t1	Y(0.97)	-	Cytoplasmiceffector	gb|PQE19396.1|	192	192	1	192	192	8	0	0	7.04e-131	inorganic phosphate transporter protein [Rutstroemia sp. NJR-2017a BBW]	tig00002064_pilon_C.paspali	2982517	2983216
g12336.t1	Y(0.97)	-	Cytoplasmiceffector	gb|PQE23086.1|	192	192	1	192	192	9	0	0	1.5e-130	inorganic phosphate transporter protein [Rutstroemia sp. NJR-2017a WRK4]	tig00002064_pilon_C.paspali	2982517	2983216
g12336.t1	Y(0.97)	-	Cytoplasmiceffector	gb|TGO17961.1|	192	192	1	192	192	19	0	0	4.94e-125	hypothetical protein BTUL_0013g00340 [Botrytis tulipae]	tig00002064_pilon_C.paspali	2982517	2983216
g12336.t1	Y(0.97)	-	Cytoplasmiceffector	gb|TGO42562.1|	192	192	1	192	192	18	0	0	2.22e-125	hypothetical protein BHYA_0007g00620 [Botrytis hyacinthi]	tig00002064_pilon_C.paspali	2982517	2983216
g12336.t1	Y(0.97)	-	Cytoplasmiceffector	gb|TGO61820.1|	192	192	1	192	192	19	0	0	2.89e-125	hypothetical protein BCON_0024g00200 [Botryotinia convoluta]	tig00002064_pilon_C.paspali	2982517	2983216
g12336.t1	Y(0.97)	-	Cytoplasmiceffector	gb|TGO79488.1|	192	192	1	192	192	17	0	0	8.26e-126	hypothetical protein BELL_0031g00230 [Botrytis elliptica]	tig00002064_pilon_C.paspali	2982517	2983216
g12336.t1	Y(0.97)	-	Cytoplasmiceffector	gb|THV51343.1|	192	192	1	192	192	17	0	0	1.45e-125	hypothetical protein BGAL_0114g00150 [Botrytis galanthina]	tig00002064_pilon_C.paspali	2982517	2983216
g12336.t1	Y(0.97)	-	Cytoplasmiceffector	ref|XP_001597838.1|	192	192	1	192	192	17	0	0	1.7e-127	inorganic phosphate transporter [Sclerotinia sclerotiorum 1980 UF-70]	tig00002064_pilon_C.paspali	2982517	2983216
g12336.t1	Y(0.97)	-	Cytoplasmiceffector	ref|XP_024549707.1|	192	192	1	192	192	17	0	0	3.37e-125	Bcpho88 [Botrytis cinerea B05.10]	tig00002064_pilon_C.paspali	2982517	2983216
g12395.t1	Y(0.925)	-	Cytoplasmiceffector	gb|APA07334.1|	81	588	1	48	48	12	0	0	3.78e-12	hypothetical protein sscle_02g021040 [Sclerotinia sclerotiorum 1980 UF-70]	tig00002064_pilon_C.paspali	3137010	3137255
g12395.t1	Y(0.925)	-	Cytoplasmiceffector	gb|EMR81159.1|	81	590	1	48	48	12	0	0	1.99e-12	putative aryl-alcohol oxidase protein [Botrytis cinerea BcDW1]	tig00002064_pilon_C.paspali	3137010	3137255
g12395.t1	Y(0.925)	-	Cytoplasmiceffector	gb|TGO08769.1|	81	588	1	48	48	12	0	0	2.44e-12	hypothetical protein BTUL_0192g00030 [Botrytis tulipae]	tig00002064_pilon_C.paspali	3137010	3137255
g12395.t1	Y(0.925)	-	Cytoplasmiceffector	gb|TGO29057.1|	81	588	1	48	48	13	0	0	7.19e-12	hypothetical protein BPAE_0019g00290 [Botrytis paeoniae]	tig00002064_pilon_C.paspali	3137010	3137255
g12395.t1	Y(0.925)	-	Cytoplasmiceffector	gb|TGO45453.1|	81	588	1	48	48	12	0	0	4.92e-12	hypothetical protein BOTNAR_0667g00020 [Botryotinia narcissicola]	tig00002064_pilon_C.paspali	3137010	3137255
g12395.t1	Y(0.925)	-	Cytoplasmiceffector	gb|TGO61952.1|	81	591	1	48	48	12	0	0	2.49e-12	hypothetical protein BCON_0023g00100 [Botryotinia convoluta]	tig00002064_pilon_C.paspali	3137010	3137255
g12395.t1	Y(0.925)	-	Cytoplasmiceffector	gb|TGO72117.1|	81	588	1	48	48	12	0	0	4.92e-12	hypothetical protein BELL_0491g00030 [Botrytis elliptica]	tig00002064_pilon_C.paspali	3137010	3137255
g12395.t1	Y(0.925)	-	Cytoplasmiceffector	gb|TGO82401.1|	81	588	1	48	48	12	0	0	2.39e-12	hypothetical protein BPOR_0839g00030 [Botrytis porri]	tig00002064_pilon_C.paspali	3137010	3137255
g12395.t1	Y(0.925)	-	Cytoplasmiceffector	ref|XP_001545605.1|	81	590	1	48	48	12	0	0	2.09e-12	hypothetical protein BCIN_01g00260 [Botrytis cinerea B05.10]	tig00002064_pilon_C.paspali	3137010	3137255
g12395.t1	Y(0.925)	-	Cytoplasmiceffector	ref|XP_001586009.1|	81	934	1	48	48	12	0	0	3.56e-12	hypothetical protein SS1G_13102 [Sclerotinia sclerotiorum 1980 UF-70]	tig00002064_pilon_C.paspali	3137010	3137255
g12413.t1	Y(0.903)	-	Cytoplasmiceffector	emb|CCD45396.1|	157	202	44	100	57	32	0	0	0.004	hypothetical protein BofuT4_P044140.1 [Botrytis cinerea T4]	tig00002064_pilon_C.paspali	3195942	3196485
g12413.t1	Y(0.903)	-	Cytoplasmiceffector	gb|EMR86117.1|	157	286	44	100	57	32	0	0	0.003	hypothetical protein BcDW1_5337 [Botrytis cinerea BcDW1]	tig00002064_pilon_C.paspali	3195942	3196485
g12413.t1	Y(0.903)	-	Cytoplasmiceffector	gb|TEY82981.1|	157	301	51	98	48	22	1	2	0.016	hypothetical protein BOTCAL_0026g00450 [Botryotinia calthae]	tig00002064_pilon_C.paspali	3195942	3196485
g12413.t1	Y(0.903)	-	Cytoplasmiceffector	gb|TGO18070.1|	157	271	44	108	65	37	0	0	0.01	hypothetical protein BTUL_0012g00140 [Botrytis tulipae]	tig00002064_pilon_C.paspali	3195942	3196485
g12413.t1	Y(0.903)	-	Cytoplasmiceffector	gb|TGO30363.1|	157	271	51	100	50	27	0	0	0.015	hypothetical protein BPAE_0006g01030 [Botrytis paeoniae]	tig00002064_pilon_C.paspali	3195942	3196485
g12413.t1	Y(0.903)	-	Cytoplasmiceffector	gb|TGO49237.1|	157	284	51	100	50	27	0	0	0.01	hypothetical protein BCON_0216g00100 [Botryotinia convoluta]	tig00002064_pilon_C.paspali	3195942	3196485
g12413.t1	Y(0.903)	-	Cytoplasmiceffector	gb|TGO64122.1|	157	256	44	115	73	41	1	1	0.006	hypothetical protein BOTNAR_0091g00050 [Botryotinia narcissicola]	tig00002064_pilon_C.paspali	3195942	3196485
g12413.t1	Y(0.903)	-	Cytoplasmiceffector	gb|TGO80562.1|	157	270	51	100	50	26	0	0	0.004	hypothetical protein BELL_0005g00470 [Botrytis elliptica]	tig00002064_pilon_C.paspali	3195942	3196485
g12413.t1	Y(0.903)	-	Cytoplasmiceffector	gb|TGO89282.1|	157	277	51	100	50	29	0	0	0.12	hypothetical protein BPOR_0116g00080 [Botrytis porri]	tig00002064_pilon_C.paspali	3195942	3196485
g12413.t1	Y(0.903)	-	Cytoplasmiceffector	gb|THV52438.1|	157	256	51	115	66	35	1	1	0.002	hypothetical protein BGAL_0079g00250 [Botrytis galanthina]	tig00002064_pilon_C.paspali	3195942	3196485
g12422.t1	Y(0.904)	-	Cytoplasmiceffector	emb|CEJ55548.1|	211	744	4	196	252	66	7	91	1.53e-28	hypothetical protein PMG11_01800 [Penicillium brasilianum]	tig00002064_pilon_C.paspali	3217346	3218378
g12422.t1	Y(0.904)	-	Cytoplasmiceffector	gb|KXG51555.1|	211	744	6	211	270	86	7	96	8.01e-26	hypothetical protein PGRI_089480 [Penicillium griseofulvum]	tig00002064_pilon_C.paspali	3217346	3218378
g12422.t1	Y(0.904)	-	Cytoplasmiceffector	gb|OJJ39609.1|	211	730	6	209	253	78	5	81	3.44e-32	hypothetical protein ASPWEDRAFT_37423 [Aspergillus wentii DTO 134E9]	tig00002064_pilon_C.paspali	3217346	3218378
g12422.t1	Y(0.904)	-	Cytoplasmiceffector	gb|OOQ89179.1|	211	740	4	196	252	66	7	91	5.83e-29	hypothetical protein PEBR_10955 [Penicillium brasilianum]	tig00002064_pilon_C.paspali	3217346	3218378
g12422.t1	Y(0.904)	-	Cytoplasmiceffector	gb|OQD85065.1|	211	761	4	198	258	78	6	95	3.66e-24	hypothetical protein PENANT_c011G00632 [Penicillium antarcticum]	tig00002064_pilon_C.paspali	3217346	3218378
g12422.t1	Y(0.904)	-	Cytoplasmiceffector	gb|RVD81182.1|	211	728	52	197	147	54	2	33	1.64e-27	hypothetical protein DFL_009056 [Duddingtonia flagrans]	tig00002064_pilon_C.paspali	3217346	3218378
g12422.t1	Y(0.904)	-	Cytoplasmiceffector	gb|TGJ70668.1|	211	738	46	197	156	61	3	36	1.59e-23	hypothetical protein EYR41_002701 [Arthrobotrys oligospora]	tig00002064_pilon_C.paspali	3217346	3218378
g12422.t1	Y(0.904)	-	Cytoplasmiceffector	ref|XP_011120551.1|	211	740	53	197	146	56	2	33	4.35e-24	hypothetical protein AOL_s00054g933 [Arthrobotrys oligospora ATCC 24927]	tig00002064_pilon_C.paspali	3217346	3218378
g12422.t1	Y(0.904)	-	Cytoplasmiceffector	ref|XP_022384867.1|	211	730	1	200	245	80	3	77	9.48e-32	hypothetical protein ABOM_009856 [Aspergillus bombycis]	tig00002064_pilon_C.paspali	3217346	3218378
g12422.t1	Y(0.904)	-	Cytoplasmiceffector	ref|XP_022482412.1|	211	716	2	209	252	86	4	75	5.18e-31	hypothetical protein PENARI_c085G09047 [Penicillium arizonense]	tig00002064_pilon_C.paspali	3217346	3218378
g1246.t1	Y(0.917)	-	Cytoplasmiceffector	emb|SMF06707.1|	103	699	6	101	123	61	4	28	0.84	peptide/nickel transport system substrate-binding protein [Paenibacillus sp. J6]	tig00000001_pilon_C.paspali	4147242	4147772
g1246.t1	Y(0.917)	-	Cytoplasmiceffector	emb|SMF13172.1|	103	656	22	101	91	53	2	11	6.5	peptide/nickel transport system substrate-binding protein [Paenibacillus barengoltzii J12]	tig00000001_pilon_C.paspali	4147242	4147772
g1246.t1	Y(0.917)	-	Cytoplasmiceffector	gb|EOS54750.1|	103	674	22	101	91	53	2	11	6.5	peptide/nickel transport system substrate-binding protein [Paenibacillus barengoltzii G22]	tig00000001_pilon_C.paspali	4147242	4147772
g1246.t1	Y(0.917)	-	Cytoplasmiceffector	ref|WP_036625750.1|	103	657	22	101	91	53	2	11	6.5	ABC transporter substrate-binding protein [Paenibacillus barengoltzii]	tig00000001_pilon_C.paspali	4147242	4147772
g1246.t1	Y(0.917)	-	Cytoplasmiceffector	ref|WP_036699444.1|	103	657	22	101	91	53	2	11	6.5	ABC transporter substrate-binding protein [Paenibacillus sp. J14]	tig00000001_pilon_C.paspali	4147242	4147772
g1246.t1	Y(0.917)	-	Cytoplasmiceffector	ref|WP_043985316.1|	103	60	44	77	34	16	1	2	4	hypothetical protein [Mycolicibacterium llatzerense]	tig00000001_pilon_C.paspali	4147242	4147772
g1246.t1	Y(0.917)	-	Cytoplasmiceffector	ref|WP_085169616.1|	103	657	22	101	91	53	2	11	4	ABC transporter substrate-binding protein [Paenibacillus sp. J6]	tig00000001_pilon_C.paspali	4147242	4147772
g1246.t1	Y(0.917)	-	Cytoplasmiceffector	ref|WP_085278698.1|	103	657	22	101	91	53	2	11	6.5	ABC transporter substrate-binding protein [Paenibacillus barengoltzii]	tig00000001_pilon_C.paspali	4147242	4147772
g1246.t1	Y(0.917)	-	Cytoplasmiceffector	ref|WP_127576511.1|	103	657	22	101	91	53	2	11	6.5	ABC transporter substrate-binding protein [Paenibacillus barengoltzii]	tig00000001_pilon_C.paspali	4147242	4147772
g12513.t1	Y(0.923)	-	Cytoplasmiceffector	gb|AWP21174.1|	116	1475	47	108	69	31	3	9	0.015	putative tenascin-like [Scophthalmus maximus]	tig00002064_pilon_C.paspali	3457589	3458069
g12612.t1	Y(0.962)	-	Cytoplasmiceffector	gb|KUO67768.1|	126	455	14	92	80	47	3	9	6.7	hydantoinase [Clostridia bacterium BRH_c25]	tig00002064_pilon_C.paspali	3816929	3817383
g12612.t1	Y(0.962)	-	Cytoplasmiceffector	gb|MAU94476.1|	126	423	18	92	75	54	0	0	2	branched-chain amino acid ABC transporter substrate-binding protein [Fulvimarina sp.]	tig00002064_pilon_C.paspali	3816929	3817383
g12612.t1	Y(0.962)	-	Cytoplasmiceffector	gb|ORY65210.1|	126	524	20	85	69	40	2	4	8.4	hypothetical protein BCR38DRAFT_432136 [Pseudomassariella vexata]	tig00002064_pilon_C.paspali	3816929	3817383
g12612.t1	Y(0.962)	-	Cytoplasmiceffector	ref|WP_035468158.1|	126	352	7	106	105	71	1	5	0.34	ATP-grasp domain-containing protein [Paraburkholderia symbiotica]	tig00002064_pilon_C.paspali	3816929	3817383
g12612.t1	Y(0.962)	-	Cytoplasmiceffector	ref|WP_083592703.1|	126	423	18	92	75	54	0	0	7.3	branched-chain amino acid ABC transporter substrate-binding protein [Aurantimonas sp. 22II-16-19i]	tig00002064_pilon_C.paspali	3816929	3817383
g12612.t1	Y(0.962)	-	Cytoplasmiceffector	ref|WP_107149753.1|	126	355	7	98	97	67	1	5	2.6	ATP-grasp domain-containing protein [Paraburkholderia symbiotica]	tig00002064_pilon_C.paspali	3816929	3817383
g12626.t1	Y(0.93)	-	Cytoplasmiceffector	gb|OFV82335.1|	87	726	1	81	82	49	2	5	8.9	hypothetical protein A2Y78_01950 [Acidobacteria bacterium RBG_13_68_16]	tig00002064_pilon_C.paspali	3847553	3847816
g12626.t1	Y(0.93)	-	Cytoplasmiceffector	gb|PYK94677.1|	87	994	1	72	72	45	1	5	0.97	L-glutamate gamma-semialdehyde dehydrogenase, partial [Verrucomicrobia bacterium]	tig00002064_pilon_C.paspali	3847553	3847816
g12626.t1	Y(0.93)	-	Cytoplasmiceffector	gb|PYL76160.1|	87	1024	1	72	72	45	1	5	0.97	L-glutamate gamma-semialdehyde dehydrogenase [Verrucomicrobia bacterium]	tig00002064_pilon_C.paspali	3847553	3847816
g12626.t1	Y(0.93)	-	Cytoplasmiceffector	gb|PYM10340.1|	87	1024	1	72	72	45	1	5	0.97	L-glutamate gamma-semialdehyde dehydrogenase [Verrucomicrobia bacterium]	tig00002064_pilon_C.paspali	3847553	3847816
g12679.t1	Y(0.988)	Y(0.543)	Cytoplasmic/apoplasticeffector	gb|ESZ99325.1|	130	130	1	130	130	10	0	0	4.32e-83	40S ribosomal protein S22 [Sclerotinia borealis F-4128]	tig00002064_pilon_C.paspali	3992936	3993583
g12679.t1	Y(0.988)	Y(0.543)	Cytoplasmic/apoplasticeffector	gb|OCK92259.1|	130	130	1	130	130	10	0	0	5.38e-83	ribosomal protein S8 [Cenococcum geophilum 1.58]	tig00002064_pilon_C.paspali	3992936	3993583
g12679.t1	Y(0.988)	Y(0.543)	Cytoplasmic/apoplasticeffector	gb|PQE12100.1|	130	130	1	130	130	2	0	0	2.74e-89	40S ribosomal S22 protein [Rutstroemia sp. NJR-2017a BVV2]	tig00002064_pilon_C.paspali	3992936	3993583
g12679.t1	Y(0.988)	Y(0.543)	Cytoplasmic/apoplasticeffector	gb|RAL62261.1|	130	130	1	130	130	8	0	0	3.38e-84	hypothetical protein DID88_004829 [Monilinia fructigena]	tig00002064_pilon_C.paspali	3992936	3993583
g12679.t1	Y(0.988)	Y(0.543)	Cytoplasmic/apoplasticeffector	ref|XP_001597981.1|	130	130	1	130	130	7	0	0	1.79e-84	40S ribosomal protein S22 [Sclerotinia sclerotiorum 1980 UF-70]	tig00002064_pilon_C.paspali	3992936	3993583
g12679.t1	Y(0.988)	Y(0.543)	Cytoplasmic/apoplasticeffector	ref|XP_002792608.1|	130	130	1	130	130	11	0	0	4.27e-83	40S ribosomal protein S22 [Paracoccidioides lutzii Pb01]	tig00002064_pilon_C.paspali	3992936	3993583
g12679.t1	Y(0.988)	Y(0.543)	Cytoplasmic/apoplasticeffector	ref|XP_008082881.1|	130	130	1	130	130	11	0	0	3.91e-83	Ribosomal protein S8 [Glarea lozoyensis ATCC 20868]	tig00002064_pilon_C.paspali	3992936	3993583
g12679.t1	Y(0.988)	Y(0.543)	Cytoplasmic/apoplasticeffector	ref|XP_018031875.1|	130	130	1	130	130	10	0	0	4.61e-83	ribosomal protein S8 [Paraphaeosphaeria sporulosa]	tig00002064_pilon_C.paspali	3992936	3993583
g12679.t1	Y(0.988)	Y(0.543)	Cytoplasmic/apoplasticeffector	ref|XP_023871929.1|	130	130	1	130	130	11	0	0	4.37e-83	40S ribosomal protein S22 [Quercus suber]	tig00002064_pilon_C.paspali	3992936	3993583
g12679.t1	Y(0.988)	Y(0.543)	Cytoplasmic/apoplasticeffector	ref|XP_024547903.1|	130	130	1	130	130	9	0	0	5.67e-84	hypothetical protein BCIN_03g07110 [Botrytis cinerea B05.10]	tig00002064_pilon_C.paspali	3992936	3993583
g12685.t1	Y(0.918)	-	Cytoplasmiceffector	gb|ESZ99334.1|	197	192	1	197	197	30	3	5	4.56e-100	hypothetical protein SBOR_0282 [Sclerotinia borealis F-4128]	tig00002064_pilon_C.paspali	4011008	4011601
g12685.t1	Y(0.918)	-	Cytoplasmiceffector	gb|PQE12090.1|	197	169	29	197	169	11	0	0	5.4e-102	herpesvirus latent membrane 1 (LMP1) domain-containing protein [Rutstroemia sp. NJR-2017a BVV2]	tig00002064_pilon_C.paspali	4011008	4011601
g12685.t1	Y(0.918)	-	Cytoplasmiceffector	gb|PQE16739.1|	197	165	29	197	169	11	1	4	8.88e-97	herpesvirus latent membrane 1 (LMP1) domain-containing protein [Rutstroemia sp. NJR-2017a BBW]	tig00002064_pilon_C.paspali	4011008	4011601
g12685.t1	Y(0.918)	-	Cytoplasmiceffector	gb|TEY85810.1|	197	190	1	197	197	36	4	7	1.64e-104	hypothetical protein BOTCAL_0011g00040 [Botryotinia calthae]	tig00002064_pilon_C.paspali	4011008	4011601
g12685.t1	Y(0.918)	-	Cytoplasmiceffector	gb|TGO09548.1|	197	190	1	197	197	33	4	7	9.21e-108	hypothetical protein BTUL_0162g00250 [Botrytis tulipae]	tig00002064_pilon_C.paspali	4011008	4011601
g12685.t1	Y(0.918)	-	Cytoplasmiceffector	gb|TGO39447.1|	197	190	1	197	197	33	4	7	3.18e-107	hypothetical protein BHYA_0054g00430 [Botrytis hyacinthi]	tig00002064_pilon_C.paspali	4011008	4011601
g12685.t1	Y(0.918)	-	Cytoplasmiceffector	gb|TGO45463.1|	197	190	1	197	197	33	4	7	4.47e-96	hypothetical protein BCON_0390g00060 [Botryotinia convoluta]	tig00002064_pilon_C.paspali	4011008	4011601
g12685.t1	Y(0.918)	-	Cytoplasmiceffector	gb|TGO53514.1|	197	190	1	197	197	34	4	7	1.76e-107	hypothetical protein BOTNAR_0293g00030 [Botryotinia narcissicola]	tig00002064_pilon_C.paspali	4011008	4011601
g12685.t1	Y(0.918)	-	Cytoplasmiceffector	gb|TGO61133.1|	197	190	1	197	197	33	4	7	7.56e-108	hypothetical protein BELL_1173g00010 [Botrytis elliptica]	tig00002064_pilon_C.paspali	4011008	4011601
g12685.t1	Y(0.918)	-	Cytoplasmiceffector	gb|TGO82176.1|	197	190	1	197	197	36	4	7	7.23e-106	hypothetical protein BPOR_0899g00010 [Botrytis porri]	tig00002064_pilon_C.paspali	4011008	4011601
g12729.t1	Y(0.952)	-	Cytoplasmiceffector	ref|XP_015718920.1|	80	343	13	60	56	25	2	9	4.6	PREDICTED: leucine zipper protein 2 [Coturnix japonica]	tig00002064_pilon_C.paspali	4160478	4160720
g12729.t1	Y(0.952)	-	Cytoplasmiceffector	ref|XP_018065609.1|	80	706	4	40	41	19	1	4	4	subtilisin-like protein [Phialocephala scopiformis]	tig00002064_pilon_C.paspali	4160478	4160720
g12729.t1	Y(0.952)	-	Cytoplasmiceffector	ref|XP_018409135.1|	80	1081	15	70	67	33	2	11	6.1	PREDICTED: CMT1A duplicated region transcript 1 protein [Nanorana parkeri]	tig00002064_pilon_C.paspali	4160478	4160720
g12746.t1	Y(0.991)	-	Cytoplasmiceffector	ref|WP_100476115.1|	78	693	17	57	41	26	0	0	3.8	hypothetical protein [Mycobacteroides abscessus]	tig00002064_pilon_C.paspali	4203649	4203885
g1279.t1	Y(0.995)	-	Cytoplasmiceffector	gb|RMD41379.1|	150	371	2	69	68	47	0	0	8.7	hypothetical protein DV735_g3754, partial [Chaetothyriales sp. CBS 134920]	tig00000001_pilon_C.paspali	4228942	4229394
g1279.t1	Y(0.995)	-	Cytoplasmiceffector	ref|WP_058836409.1|	150	2874	4	53	50	26	1	6	9.2	cyclic beta 1-2 glucan synthetase [Luteimonas abyssi]	tig00000001_pilon_C.paspali	4228942	4229394
g1279.t1	Y(0.995)	-	Cytoplasmiceffector	ref|WP_135631254.1|	150	227	21	142	131	74	5	20	2.7	hypothetical protein [Leptospira meyeri]	tig00000001_pilon_C.paspali	4228942	4229394
g12800.t1	Y(0.984)	-	Cytoplasmiceffector	gb|APA07812.1|	147	193	1	147	147	11	1	3	1.78e-92	hypothetical protein sscle_03g025820 [Sclerotinia sclerotiorum 1980 UF-70]	tig00002064_pilon_C.paspali	4340126	4340699
g12800.t1	Y(0.984)	-	Cytoplasmiceffector	gb|PQE12005.1|	147	203	1	147	173	3	1	26	1.77e-96	DUF1649 domain protein [Rutstroemia sp. NJR-2017a BVV2]	tig00002064_pilon_C.paspali	4340126	4340699
g12800.t1	Y(0.984)	-	Cytoplasmiceffector	gb|PQE16678.1|	147	231	1	147	173	5	1	26	4.24e-95	DUF1649 domain protein [Rutstroemia sp. NJR-2017a BBW]	tig00002064_pilon_C.paspali	4340126	4340699
g12800.t1	Y(0.984)	-	Cytoplasmiceffector	gb|PQE22309.1|	147	231	1	147	173	5	1	26	3.41e-95	DUF1649 domain protein [Rutstroemia sp. NJR-2017a WRK4]	tig00002064_pilon_C.paspali	4340126	4340699
g12800.t1	Y(0.984)	-	Cytoplasmiceffector	gb|RAL67496.1|	147	193	1	147	147	13	1	3	1.29e-90	hypothetical protein DID88_008251 [Monilinia fructigena]	tig00002064_pilon_C.paspali	4340126	4340699
g12800.t1	Y(0.984)	-	Cytoplasmiceffector	gb|RDL35048.1|	147	193	1	147	147	17	1	3	8.72e-90	Uncharacterized protein BP5553_06979 [Phialophora cf. hyalina BP 5553]	tig00002064_pilon_C.paspali	4340126	4340699
g12800.t1	Y(0.984)	-	Cytoplasmiceffector	gb|TEY85875.1|	147	144	1	147	147	15	1	3	1.9e-90	hypothetical protein BOTCAL_0010g00140 [Botryotinia calthae]	tig00002064_pilon_C.paspali	4340126	4340699
g12800.t1	Y(0.984)	-	Cytoplasmiceffector	gb|TGO51437.1|	147	174	1	147	147	15	1	3	5.75e-90	hypothetical protein BCON_0161g00100 [Botryotinia convoluta]	tig00002064_pilon_C.paspali	4340126	4340699
g12800.t1	Y(0.984)	-	Cytoplasmiceffector	ref|XP_001598505.1|	147	144	1	147	147	11	1	3	1.95e-93	hypothetical protein SS1G_00594 [Sclerotinia sclerotiorum 1980 UF-70]	tig00002064_pilon_C.paspali	4340126	4340699
g12800.t1	Y(0.984)	-	Cytoplasmiceffector	ref|XP_024717849.1|	147	193	1	147	147	17	1	3	2.88e-90	hypothetical protein M430DRAFT_127023 [Amorphotheca resinae ATCC 22711]	tig00002064_pilon_C.paspali	4340126	4340699
g12807.t1	Y(0.979)	-	Cytoplasmiceffector	emb|CCD44895.1|	123	123	1	123	123	18	0	0	1.21e-74	similar to NADH dehydrogenase 1 alpha subcomplex subunit 6 [Botrytis cinerea T4]	tig00002064_pilon_C.paspali	4353344	4354151
g12807.t1	Y(0.979)	-	Cytoplasmiceffector	gb|ESZ95015.1|	123	123	1	123	123	17	0	0	3.73e-73	putative NADH-ubiquinone oxidoreductase B14 subunit [Sclerotinia borealis F-4128]	tig00002064_pilon_C.paspali	4353344	4354151
g12807.t1	Y(0.979)	-	Cytoplasmiceffector	gb|RAL67501.1|	123	123	1	123	123	17	0	0	6.43e-75	hypothetical protein DID88_008256 [Monilinia fructigena]	tig00002064_pilon_C.paspali	4353344	4354151
g12807.t1	Y(0.979)	-	Cytoplasmiceffector	gb|TEY85880.1|	123	123	1	123	123	16	0	0	8.63e-76	hypothetical protein BOTCAL_0010g00190 [Botryotinia calthae]	tig00002064_pilon_C.paspali	4353344	4354151
g12807.t1	Y(0.979)	-	Cytoplasmiceffector	gb|TGO26148.1|	123	124	1	120	120	16	0	0	1.99e-73	hypothetical protein BPAE_0065g00240 [Botrytis paeoniae]	tig00002064_pilon_C.paspali	4353344	4354151
g12807.t1	Y(0.979)	-	Cytoplasmiceffector	gb|TGO51777.1|	123	123	1	123	123	22	0	0	4.91e-72	hypothetical protein BOTNAR_0344g00100 [Botryotinia narcissicola]	tig00002064_pilon_C.paspali	4353344	4354151
g12807.t1	Y(0.979)	-	Cytoplasmiceffector	gb|TGO91399.1|	123	123	1	123	123	18	0	0	7.11e-74	hypothetical protein BPOR_0029g00220 [Botrytis porri]	tig00002064_pilon_C.paspali	4353344	4354151
g12807.t1	Y(0.979)	-	Cytoplasmiceffector	gb|THV46937.1|	123	155	1	120	120	16	0	0	2.79e-73	hypothetical protein BGAL_0348g00040 [Botrytis galanthina]	tig00002064_pilon_C.paspali	4353344	4354151
g12807.t1	Y(0.979)	-	Cytoplasmiceffector	ref|XP_001555056.1|	123	123	1	123	123	17	0	0	5.95e-75	hypothetical protein BCIN_03g02440 [Botrytis cinerea B05.10]	tig00002064_pilon_C.paspali	4353344	4354151
g12807.t1	Y(0.979)	-	Cytoplasmiceffector	ref|XP_001598500.1|	123	123	1	123	123	21	0	0	6.26e-72	hypothetical protein SS1G_00589 [Sclerotinia sclerotiorum 1980 UF-70]	tig00002064_pilon_C.paspali	4353344	4354151
g12829.t1	Y(0.903)	-	Cytoplasmiceffector	emb|CCD54657.1|	146	110	77	106	30	4	0	0	4.25e-10	hypothetical protein BofuT4_P127050.1 [Botrytis cinerea T4]	tig00002064_pilon_C.paspali	4423029	4423469
g12839.t1	Y(0.925)	-	Cytoplasmiceffector	gb|APA14123.1|	154	214	1	152	152	2	0	0	4.33e-106	hypothetical protein sscle_12g088930 [Sclerotinia sclerotiorum 1980 UF-70]	tig00002064_pilon_C.paspali	4450039	4450556
g12839.t1	Y(0.925)	-	Cytoplasmiceffector	gb|ESZ96762.1|	154	155	1	152	152	3	0	0	8.32e-106	40S ribosomal protein S27a [Sclerotinia borealis F-4128]	tig00002064_pilon_C.paspali	4450039	4450556
g12839.t1	Y(0.925)	-	Cytoplasmiceffector	gb|KIN01001.1|	154	155	1	152	152	1	0	0	1.66e-106	hypothetical protein OIDMADRAFT_54142 [Oidiodendron maius Zn]	tig00002064_pilon_C.paspali	4450039	4450556
g12839.t1	Y(0.925)	-	Cytoplasmiceffector	gb|PQM43908.1|	154	156	1	153	153	1	0	0	6.96e-108	ribosomal 40S subunit protein S27A [Pseudogymnoascus verrucosus]	tig00002064_pilon_C.paspali	4450039	4450556
g12839.t1	Y(0.925)	-	Cytoplasmiceffector	gb|RAL61979.1|	154	212	1	152	152	1	0	0	1.29e-106	hypothetical protein DID88_002468 [Monilinia fructigena]	tig00002064_pilon_C.paspali	4450039	4450556
g12839.t1	Y(0.925)	-	Cytoplasmiceffector	ref|XP_001587795.1|	154	155	1	152	152	2	0	0	2.57e-106	ubiquitin-40S ribosomal protein S31 fusion protein [Sclerotinia sclerotiorum 1980 UF-70]	tig00002064_pilon_C.paspali	4450039	4450556
g12839.t1	Y(0.925)	-	Cytoplasmiceffector	ref|XP_002480364.1|	154	154	1	154	154	5	0	0	1.73e-105	ubiquitin-40S ribosomal protein S31 fusion protein [Talaromyces stipitatus ATCC 10500]	tig00002064_pilon_C.paspali	4450039	4450556
g12839.t1	Y(0.925)	-	Cytoplasmiceffector	ref|XP_018069102.1|	154	155	1	152	152	2	0	0	8.88e-106	putative ubiquitin-40S ribosomal protein S27a [Phialocephala scopiformis]	tig00002064_pilon_C.paspali	4450039	4450556
g12839.t1	Y(0.925)	-	Cytoplasmiceffector	ref|XP_024328829.1|	154	156	1	153	153	3	0	0	1.7e-106	ribosomal 40S subunit protein S27A [Pseudogymnoascus destructans]	tig00002064_pilon_C.paspali	4450039	4450556
g12839.t1	Y(0.925)	-	Cytoplasmiceffector	ref|XP_024744262.1|	154	155	1	152	152	2	0	0	6.05e-106	putative ubiquitin-40S ribosomal protein S27a [Meliniomyces bicolor E]	tig00002064_pilon_C.paspali	4450039	4450556
g12845.t1	Y(0.958)	-	Cytoplasmiceffector	gb|KFX92305.1|	133	133	1	133	133	15	0	0	3.25e-84	hypothetical protein V490_05442 [Pseudogymnoascus sp. VKM F-3557]	tig00002064_pilon_C.paspali	4463448	4464557
g12845.t1	Y(0.958)	-	Cytoplasmiceffector	gb|KFY17876.1|	133	133	1	133	133	17	0	0	2.53e-83	hypothetical protein V492_00336 [Pseudogymnoascus sp. VKM F-4246]	tig00002064_pilon_C.paspali	4463448	4464557
g12845.t1	Y(0.958)	-	Cytoplasmiceffector	gb|KFY26125.1|	133	133	1	133	133	19	0	0	1.75e-82	hypothetical protein V491_01444 [Pseudogymnoascus sp. VKM F-3775]	tig00002064_pilon_C.paspali	4463448	4464557
g12845.t1	Y(0.958)	-	Cytoplasmiceffector	gb|KFZ22653.1|	133	133	1	133	133	18	0	0	4.43e-83	hypothetical protein V502_02855 [Pseudogymnoascus sp. VKM F-4520 (FW-2644)]	tig00002064_pilon_C.paspali	4463448	4464557
g12845.t1	Y(0.958)	-	Cytoplasmiceffector	gb|PQE14379.1|	133	128	1	133	133	5	1	5	2.98e-83	HIT domain-containing protein [Rutstroemia sp. NJR-2017a BBW]	tig00002064_pilon_C.paspali	4463448	4464557
g12845.t1	Y(0.958)	-	Cytoplasmiceffector	gb|PVH76008.1|	133	133	1	133	133	20	0	0	8.96e-82	HIT domain-containing protein [Cadophora sp. DSE1049]	tig00002064_pilon_C.paspali	4463448	4464557
g12845.t1	Y(0.958)	-	Cytoplasmiceffector	gb|TEY85116.1|	133	136	2	133	132	17	0	0	3.45e-82	hypothetical protein BOTCAL_0017g00290 [Botryotinia calthae]	tig00002064_pilon_C.paspali	4463448	4464557
g12845.t1	Y(0.958)	-	Cytoplasmiceffector	gb|TGO80432.1|	133	136	2	133	132	16	0	0	1.19e-82	hypothetical protein BELL_0007g00230 [Botrytis elliptica]	tig00002064_pilon_C.paspali	4463448	4464557
g12845.t1	Y(0.958)	-	Cytoplasmiceffector	ref|XP_024547182.1|	133	136	2	133	132	17	0	0	1.19e-82	Bchnt1 [Botrytis cinerea B05.10]	tig00002064_pilon_C.paspali	4463448	4464557
g12845.t1	Y(0.958)	-	Cytoplasmiceffector	ref|XP_024716738.1|	133	134	2	133	132	17	0	0	5.4e-83	hypothetical protein M430DRAFT_70227 [Amorphotheca resinae ATCC 22711]	tig00002064_pilon_C.paspali	4463448	4464557
g12856.t1	Y(0.914)	-	Cytoplasmiceffector	gb|APA14106.1|	289	289	1	289	289	56	0	0	9.93e-174	hypothetical protein sscle_12g088760 [Sclerotinia sclerotiorum 1980 UF-70]	tig00002064_pilon_C.paspali	4485286	4486319
g12856.t1	Y(0.914)	-	Cytoplasmiceffector	gb|PQE14367.1|	289	270	1	289	289	35	2	19	6.45e-168	metallo-beta-lactamase superfamily protein [Rutstroemia sp. NJR-2017a BBW]	tig00002064_pilon_C.paspali	4485286	4486319
g12856.t1	Y(0.914)	-	Cytoplasmiceffector	gb|PQE31735.1|	289	258	1	289	289	26	1	31	7.29e-167	metallo-beta-lactamase superfamily protein [Rutstroemia sp. NJR-2017a WRK4]	tig00002064_pilon_C.paspali	4485286	4486319
g12856.t1	Y(0.914)	-	Cytoplasmiceffector	gb|TEY85126.1|	289	299	1	289	289	67	0	0	4.25e-168	hypothetical protein BOTCAL_0017g00400 [Botryotinia calthae]	tig00002064_pilon_C.paspali	4485286	4486319
g12856.t1	Y(0.914)	-	Cytoplasmiceffector	gb|TGO29620.1|	289	299	1	289	289	67	0	0	3.85e-168	hypothetical protein BPAE_0013g00720 [Botrytis paeoniae]	tig00002064_pilon_C.paspali	4485286	4486319
g12856.t1	Y(0.914)	-	Cytoplasmiceffector	gb|TGO43251.1|	289	303	1	289	293	65	1	4	8.41e-168	hypothetical protein BHYA_0002g00560 [Botrytis hyacinthi]	tig00002064_pilon_C.paspali	4485286	4486319
g12856.t1	Y(0.914)	-	Cytoplasmiceffector	gb|TGO50680.1|	289	299	1	289	289	66	0	0	2.04e-168	hypothetical protein BCON_0178g00060 [Botryotinia convoluta]	tig00002064_pilon_C.paspali	4485286	4486319
g12856.t1	Y(0.914)	-	Cytoplasmiceffector	gb|TGO80442.1|	289	299	1	289	289	64	0	0	1.51e-170	hypothetical protein BELL_0007g00330 [Botrytis elliptica]	tig00002064_pilon_C.paspali	4485286	4486319
g12856.t1	Y(0.914)	-	Cytoplasmiceffector	gb|THV45288.1|	289	299	1	289	289	66	0	0	1.52e-169	hypothetical protein BGAL_0506g00020 [Botrytis galanthina]	tig00002064_pilon_C.paspali	4485286	4486319
g12856.t1	Y(0.914)	-	Cytoplasmiceffector	ref|XP_024547191.1|	289	298	1	289	289	65	1	1	5.27e-167	hypothetical protein BCIN_02g05980 [Botrytis cinerea B05.10]	tig00002064_pilon_C.paspali	4485286	4486319
g12907.t1	Y(0.9)	-	Cytoplasmiceffector	gb|KFX91992.1|	354	506	1	354	354	10	0	0	0	hypothetical protein V490_05613 [Pseudogymnoascus sp. VKM F-3557]	tig00002064_pilon_C.paspali	4618208	4619481
g12907.t1	Y(0.9)	-	Cytoplasmiceffector	gb|KFY24143.1|	354	354	1	354	354	9	0	0	0	hypothetical protein V493_05426 [Pseudogymnoascus sp. VKM F-4281 (FW-2241)]	tig00002064_pilon_C.paspali	4618208	4619481
g12907.t1	Y(0.9)	-	Cytoplasmiceffector	gb|PQE14416.1|	354	354	1	354	354	2	0	0	0	pathogenicity MAP kinase 1 protein [Rutstroemia sp. NJR-2017a BBW]	tig00002064_pilon_C.paspali	4618208	4619481
g12907.t1	Y(0.9)	-	Cytoplasmiceffector	gb|TEY78827.1|	354	356	1	354	356	4	2	2	0	hypothetical protein BOTCAL_0045g00450 [Botryotinia calthae]	tig00002064_pilon_C.paspali	4618208	4619481
g12907.t1	Y(0.9)	-	Cytoplasmiceffector	gb|TGO12419.1|	354	355	1	354	355	3	1	1	0	hypothetical protein BTUL_0089g00570 [Botrytis tulipae]	tig00002064_pilon_C.paspali	4618208	4619481
g12907.t1	Y(0.9)	-	Cytoplasmiceffector	gb|TGO25185.1|	354	356	1	354	356	3	2	2	0	hypothetical protein BPAE_0085g00050 [Botrytis paeoniae]	tig00002064_pilon_C.paspali	4618208	4619481
g12907.t1	Y(0.9)	-	Cytoplasmiceffector	gb|TGO64964.1|	354	356	1	354	356	3	2	2	0	hypothetical protein BOTNAR_0082g00060 [Botryotinia narcissicola]	tig00002064_pilon_C.paspali	4618208	4619481
g12907.t1	Y(0.9)	-	Cytoplasmiceffector	gb|TGO69697.1|	354	355	1	354	355	4	1	1	0	hypothetical protein BELL_0761g00010 [Botrytis elliptica]	tig00002064_pilon_C.paspali	4618208	4619481
g12907.t1	Y(0.9)	-	Cytoplasmiceffector	ref|XP_001586837.1|	354	355	1	354	355	5	1	1	0	mitogen-activated protein kinase [Sclerotinia sclerotiorum 1980 UF-70]	tig00002064_pilon_C.paspali	4618208	4619481
g12907.t1	Y(0.9)	-	Cytoplasmiceffector	ref|XP_024547333.1|	354	355	1	354	355	4	1	1	0	Bmp1 [Botrytis cinerea B05.10]	tig00002064_pilon_C.paspali	4618208	4619481
g12926.t1	Y(0.955)	-	Cytoplasmiceffector	gb|ELA32714.1|	116	116	1	112	113	46	2	4	1.61e-34	duf167 domain protein [Colletotrichum fructicola Nara gc5]	tig00002064_pilon_C.paspali	4676944	4677346
g12926.t1	Y(0.955)	-	Cytoplasmiceffector	gb|EQB53598.1|	116	116	2	112	111	48	1	3	6.18e-34	hypothetical protein CGLO_06682 [Colletotrichum gloeosporioides Cg-14]	tig00002064_pilon_C.paspali	4676944	4677346
g12926.t1	Y(0.955)	-	Cytoplasmiceffector	gb|PQE14442.1|	116	117	1	116	117	22	1	1	7.94e-62	DUF167 domain protein [Rutstroemia sp. NJR-2017a BBW]	tig00002064_pilon_C.paspali	4676944	4677346
g12926.t1	Y(0.955)	-	Cytoplasmiceffector	gb|PQE32352.1|	116	117	1	116	117	24	1	1	1.66e-59	duf167 domain protein [Rutstroemia sp. NJR-2017a WRK4]	tig00002064_pilon_C.paspali	4676944	4677346
g12926.t1	Y(0.955)	-	Cytoplasmiceffector	gb|PVH88024.1|	116	118	4	116	113	51	0	0	1.06e-41	YggU-like protein [Cadophora sp. DSE1049]	tig00002064_pilon_C.paspali	4676944	4677346
g12926.t1	Y(0.955)	-	Cytoplasmiceffector	gb|RDL32530.1|	116	118	4	116	113	46	0	0	3.19e-44	YggU-like protein [Phialophora cf. hyalina BP 5553]	tig00002064_pilon_C.paspali	4676944	4677346
g12926.t1	Y(0.955)	-	Cytoplasmiceffector	gb|TDZ17309.1|	116	116	3	116	114	53	1	3	1.65e-33	UPF0235 protein C15orf40-like protein [Colletotrichum orbiculare MAFF 240422]	tig00002064_pilon_C.paspali	4676944	4677346
g12926.t1	Y(0.955)	-	Cytoplasmiceffector	gb|TDZ53286.1|	116	116	3	116	114	52	1	3	8.68e-34	UPF0235 protein C15orf40-like protein [Colletotrichum trifolii]	tig00002064_pilon_C.paspali	4676944	4677346
g12926.t1	Y(0.955)	-	Cytoplasmiceffector	ref|XP_018065022.1|	116	117	5	111	107	45	1	2	2.18e-36	YggU-like protein [Phialocephala scopiformis]	tig00002064_pilon_C.paspali	4676944	4677346
g12926.t1	Y(0.955)	-	Cytoplasmiceffector	ref|XP_024717404.1|	116	113	4	115	112	47	0	0	7.13e-41	hypothetical protein M430DRAFT_128011, partial [Amorphotheca resinae ATCC 22711]	tig00002064_pilon_C.paspali	4676944	4677346
g12939.t1	Y(0.923)	-	Cytoplasmiceffector	gb|ESZ96796.1|	122	123	1	122	123	19	1	1	9.21e-65	hypothetical protein SBOR_2797 [Sclerotinia borealis F-4128]	tig00002064_pilon_C.paspali	4708864	4709564
g12939.t1	Y(0.923)	-	Cytoplasmiceffector	gb|PQE14439.1|	122	144	1	122	144	7	2	22	1.95e-67	prefoldin subunit 6 protein [Rutstroemia sp. NJR-2017a BBW]	tig00002064_pilon_C.paspali	4708864	4709564
g12939.t1	Y(0.923)	-	Cytoplasmiceffector	gb|PQE32389.1|	122	123	1	122	123	6	1	1	3.5e-73	prefoldin subunit 6 protein [Rutstroemia sp. NJR-2017a WRK4]	tig00002064_pilon_C.paspali	4708864	4709564
g12939.t1	Y(0.923)	-	Cytoplasmiceffector	gb|TGO12380.1|	122	123	1	122	123	13	1	1	6.31e-69	hypothetical protein BTUL_0089g00170 [Botrytis tulipae]	tig00002064_pilon_C.paspali	4708864	4709564
g12939.t1	Y(0.923)	-	Cytoplasmiceffector	gb|TGO25220.1|	122	123	1	122	123	13	1	1	9.16e-69	hypothetical protein BPAE_0085g00400 [Botrytis paeoniae]	tig00002064_pilon_C.paspali	4708864	4709564
g12939.t1	Y(0.923)	-	Cytoplasmiceffector	gb|TGO42116.1|	122	123	1	122	123	13	1	1	8.86e-69	hypothetical protein BHYA_0012g00310 [Botrytis hyacinthi]	tig00002064_pilon_C.paspali	4708864	4709564
g12939.t1	Y(0.923)	-	Cytoplasmiceffector	gb|TGO47042.1|	122	123	1	122	123	14	1	1	4.91e-68	hypothetical protein BCON_0296g00010 [Botryotinia convoluta]	tig00002064_pilon_C.paspali	4708864	4709564
g12939.t1	Y(0.923)	-	Cytoplasmiceffector	gb|TGO69320.1|	122	123	1	122	123	14	1	1	2.02e-68	hypothetical protein BOTNAR_0012g00070 [Botryotinia narcissicola]	tig00002064_pilon_C.paspali	4708864	4709564
g12939.t1	Y(0.923)	-	Cytoplasmiceffector	gb|TGO71507.1|	122	123	1	122	123	14	1	1	4.16e-68	hypothetical protein BELL_0567g00050 [Botrytis elliptica]	tig00002064_pilon_C.paspali	4708864	4709564
g12939.t1	Y(0.923)	-	Cytoplasmiceffector	ref|XP_024547352.1|	122	123	1	122	123	12	1	1	2.15e-69	Bcyke2 [Botrytis cinerea B05.10]	tig00002064_pilon_C.paspali	4708864	4709564
g12941.t1	Y(0.925)	-	Cytoplasmiceffector	emb|CZR57450.1|	127	129	1	127	129	50	1	2	1.09e-51	uncharacterized protein PAC_07339 [Phialocephala subalpina]	tig00002064_pilon_C.paspali	4712562	4713156
g12941.t1	Y(0.925)	-	Cytoplasmiceffector	gb|ESZ96798.1|	127	119	1	127	127	39	2	8	5.41e-49	hypothetical protein SBOR_2799 [Sclerotinia borealis F-4128]	tig00002064_pilon_C.paspali	4712562	4713156
g12941.t1	Y(0.925)	-	Cytoplasmiceffector	gb|PMD42533.1|	127	130	1	127	130	51	1	3	2.99e-50	hypothetical protein L207DRAFT_581191 [Hyaloscypha variabilis F]	tig00002064_pilon_C.paspali	4712562	4713156
g12941.t1	Y(0.925)	-	Cytoplasmiceffector	gb|PQE14440.1|	127	122	1	127	127	40	1	5	1.89e-53	hypothetical protein CJF30_00007035 [Rutstroemia sp. NJR-2017a BBW]	tig00002064_pilon_C.paspali	4712562	4713156
g12941.t1	Y(0.925)	-	Cytoplasmiceffector	gb|PQE32387.1|	127	122	1	127	127	42	1	5	9.37e-53	hypothetical protein CJF32_00001141 [Rutstroemia sp. NJR-2017a WRK4]	tig00002064_pilon_C.paspali	4712562	4713156
g12941.t1	Y(0.925)	-	Cytoplasmiceffector	gb|TGO12388.1|	127	115	1	127	127	35	2	12	1.54e-47	hypothetical protein BTUL_0089g00250 [Botrytis tulipae]	tig00002064_pilon_C.paspali	4712562	4713156
g12941.t1	Y(0.925)	-	Cytoplasmiceffector	gb|TGO52493.1|	127	115	1	127	127	36	2	12	1.96e-47	hypothetical protein BCON_0140g00070 [Botryotinia convoluta]	tig00002064_pilon_C.paspali	4712562	4713156
g12941.t1	Y(0.925)	-	Cytoplasmiceffector	ref|XP_008086154.1|	127	127	1	126	126	53	0	0	5.71e-49	hypothetical protein GLAREA_02878 [Glarea lozoyensis ATCC 20868]	tig00002064_pilon_C.paspali	4712562	4713156
g12941.t1	Y(0.925)	-	Cytoplasmiceffector	ref|XP_018065004.1|	127	130	1	127	130	54	1	3	2.91e-49	hypothetical protein LY89DRAFT_247911 [Phialocephala scopiformis]	tig00002064_pilon_C.paspali	4712562	4713156
g12941.t1	Y(0.925)	-	Cytoplasmiceffector	ref|XP_024744129.1|	127	130	1	127	133	43	2	9	8.11e-51	hypothetical protein K444DRAFT_9899 [Meliniomyces bicolor E]	tig00002064_pilon_C.paspali	4712562	4713156
g13002.t1	Y(0.951)	-	Cytoplasmiceffector	ref|NP_001158127.1|	175	2581	61	140	80	46	1	10	6	Fc fragment of IgG binding protein-like precursor [Mus musculus]	tig00002064_pilon_C.paspali	4862657	4863242
g13002.t1	Y(0.951)	-	Cytoplasmiceffector	ref|XP_016181477.1|	175	315	47	163	121	75	5	12	1.2	zinc finger protein 830-like [Arachis ipaensis]	tig00002064_pilon_C.paspali	4862657	4863242
g13042.t1	Y(0.958)	-	Cytoplasmiceffector	gb|ESZ96686.1|	132	157	2	131	158	44	2	29	3.9e-46	hypothetical protein SBOR_2945 [Sclerotinia borealis F-4128]	tig00002064_pilon_C.paspali	4993461	4993993
g13042.t1	Y(0.958)	-	Cytoplasmiceffector	gb|PQE13314.1|	132	115	37	132	96	6	0	0	4.71e-49	signal recognition particle 14kD protein [Rutstroemia sp. NJR-2017a BVV2]	tig00002064_pilon_C.paspali	4993461	4993993
g13042.t1	Y(0.958)	-	Cytoplasmiceffector	gb|PQE32460.1|	132	131	2	132	131	9	0	0	3.35e-75	signal recognition particle 14kD protein [Rutstroemia sp. NJR-2017a WRK4]	tig00002064_pilon_C.paspali	4993461	4993993
g13042.t1	Y(0.958)	-	Cytoplasmiceffector	gb|RAL61959.1|	132	159	2	131	160	38	2	31	1.27e-41	hypothetical protein DID88_002448 [Monilinia fructigena]	tig00002064_pilon_C.paspali	4993461	4993993
g13042.t1	Y(0.958)	-	Cytoplasmiceffector	gb|TEY85315.1|	132	157	2	132	160	35	3	32	1.93e-41	hypothetical protein BOTCAL_0014g00450 [Botryotinia calthae]	tig00002064_pilon_C.paspali	4993461	4993993
g13042.t1	Y(0.958)	-	Cytoplasmiceffector	gb|TGO18707.1|	132	158	2	132	161	35	4	33	4.86e-41	hypothetical protein BTUL_0008g00920 [Botrytis tulipae]	tig00002064_pilon_C.paspali	4993461	4993993
g13042.t1	Y(0.958)	-	Cytoplasmiceffector	gb|TGO41806.1|	132	158	2	132	161	36	3	33	5.03e-41	hypothetical protein BHYA_0016g00450 [Botrytis hyacinthi]	tig00002064_pilon_C.paspali	4993461	4993993
g13042.t1	Y(0.958)	-	Cytoplasmiceffector	gb|TGO51003.1|	132	158	2	132	161	35	4	33	7.37e-41	hypothetical protein BCON_0171g00160 [Botryotinia convoluta]	tig00002064_pilon_C.paspali	4993461	4993993
g13042.t1	Y(0.958)	-	Cytoplasmiceffector	gb|TGO79803.1|	132	158	2	132	161	35	4	33	5.86e-41	hypothetical protein BELL_0022g00130 [Botrytis elliptica]	tig00002064_pilon_C.paspali	4993461	4993993
g13042.t1	Y(0.958)	-	Cytoplasmiceffector	ref|XP_024547219.1|	132	157	2	132	160	35	3	32	5.37e-42	hypothetical protein BCIN_02g06420 [Botrytis cinerea B05.10]	tig00002064_pilon_C.paspali	4993461	4993993
g13047.t1	Y(0.923)	-	Cytoplasmiceffector	gb|EMR82162.1|	86	99	2	86	85	47	3	9	0.043	hypothetical protein BcDW1_9193 [Botrytis cinerea BcDW1]	tig00002064_pilon_C.paspali	5003693	5003953
g13047.t1	Y(0.923)	-	Cytoplasmiceffector	gb|TEY85320.1|	86	104	2	86	85	46	3	9	0.015	hypothetical protein BOTCAL_0014g00500 [Botryotinia calthae]	tig00002064_pilon_C.paspali	5003693	5003953
g13047.t1	Y(0.923)	-	Cytoplasmiceffector	gb|TGO18702.1|	86	104	2	86	87	44	4	13	0.063	hypothetical protein BTUL_0008g00870 [Botrytis tulipae]	tig00002064_pilon_C.paspali	5003693	5003953
g13047.t1	Y(0.923)	-	Cytoplasmiceffector	gb|TGO29587.1|	86	104	2	86	87	43	4	13	0.038	hypothetical protein BPAE_0013g00390 [Botrytis paeoniae]	tig00002064_pilon_C.paspali	5003693	5003953
g13047.t1	Y(0.923)	-	Cytoplasmiceffector	gb|TGO41811.1|	86	104	2	86	87	44	4	13	0.21	hypothetical protein BHYA_0016g00500 [Botrytis hyacinthi]	tig00002064_pilon_C.paspali	5003693	5003953
g13047.t1	Y(0.923)	-	Cytoplasmiceffector	gb|TGO51007.1|	86	104	2	86	87	44	4	13	0.028	hypothetical protein BCON_0171g00200 [Botryotinia convoluta]	tig00002064_pilon_C.paspali	5003693	5003953
g13047.t1	Y(0.923)	-	Cytoplasmiceffector	gb|TGO68594.1|	86	104	45	86	44	26	1	2	0.82	hypothetical protein BOTNAR_0022g00020 [Botryotinia narcissicola]	tig00002064_pilon_C.paspali	5003693	5003953
g13047.t1	Y(0.923)	-	Cytoplasmiceffector	gb|TGO79798.1|	86	104	38	86	51	28	2	3	0.18	hypothetical protein BELL_0022g00080 [Botrytis elliptica]	tig00002064_pilon_C.paspali	5003693	5003953
g13047.t1	Y(0.923)	-	Cytoplasmiceffector	gb|THV52617.1|	86	101	68	86	19	7	0	0	0.6	hypothetical protein BGAL_0074g00290 [Botrytis galanthina]	tig00002064_pilon_C.paspali	5003693	5003953
g13047.t1	Y(0.923)	-	Cytoplasmiceffector	ref|XP_001550608.2|	86	104	2	86	85	47	3	9	0.038	hypothetical protein BCIN_02g06370 [Botrytis cinerea B05.10]	tig00002064_pilon_C.paspali	5003693	5003953
g13070.t1	Y(0.924)	-	Cytoplasmiceffector	gb|PBP15556.1|	135	136	1	135	140	11	2	9	1.4e-73	Histone H2B [Diplocarpon rosae]	tig00002064_pilon_C.paspali	5057510	5058120
g13070.t1	Y(0.924)	-	Cytoplasmiceffector	gb|PQE13289.1|	135	205	1	135	135	3	1	1	2.97e-84	Histone H2B protein [Rutstroemia sp. NJR-2017a BVV2]	tig00002064_pilon_C.paspali	5057510	5058120
g13070.t1	Y(0.924)	-	Cytoplasmiceffector	gb|PQE14519.1|	135	135	1	135	135	2	0	0	2.63e-88	histone H2B protein [Rutstroemia sp. NJR-2017a BBW]	tig00002064_pilon_C.paspali	5057510	5058120
g13070.t1	Y(0.924)	-	Cytoplasmiceffector	gb|PSR85513.1|	135	138	1	135	139	15	2	5	2.17e-73	histone-fold-containing protein [Coniella lustricola]	tig00002064_pilon_C.paspali	5057510	5058120
g13070.t1	Y(0.924)	-	Cytoplasmiceffector	gb|RDW67913.1|	135	137	1	135	141	11	2	10	2.03e-73	histone H2B [Coleophoma cylindrospora]	tig00002064_pilon_C.paspali	5057510	5058120
g13070.t1	Y(0.924)	-	Cytoplasmiceffector	gb|RYP03420.1|	135	137	1	135	138	15	2	4	1.27e-73	hypothetical protein DL765_010506 [Monosporascus sp. GIB2]	tig00002064_pilon_C.paspali	5057510	5058120
g13070.t1	Y(0.924)	-	Cytoplasmiceffector	ref|XP_003344380.1|	135	137	1	135	138	14	2	4	1.4e-74	uncharacterized protein SMAC_08323 [Sordaria macrospora k-hell]	tig00002064_pilon_C.paspali	5057510	5058120
g13070.t1	Y(0.924)	-	Cytoplasmiceffector	ref|XP_007806466.1|	135	137	1	135	138	15	2	4	8.92e-74	histone H2B [Metarhizium acridum CQMa 102]	tig00002064_pilon_C.paspali	5057510	5058120
g13070.t1	Y(0.924)	-	Cytoplasmiceffector	ref|XP_007912731.1|	135	137	1	135	138	15	2	4	1.03e-73	putative histone h2b protein [Phaeoacremonium minimum UCRPA7]	tig00002064_pilon_C.paspali	5057510	5058120
g13070.t1	Y(0.924)	-	Cytoplasmiceffector	ref|XP_018749948.1|	135	138	1	135	138	18	1	3	3.47e-74	histone H2B [Fusarium verticillioides 7600]	tig00002064_pilon_C.paspali	5057510	5058120
g13071.t1	Y(0.9)	-	Cytoplasmiceffector	gb|ABV75017.1|	201	267	70	154	93	53	2	10	2.3	biotin--protein ligase [Rickettsia akari str. Hartford]	tig00002064_pilon_C.paspali	5058866	5059530
g13071.t1	Y(0.9)	-	Cytoplasmiceffector	ref|WP_092439684.1|	201	314	63	135	73	47	1	2	4.7	hypothetical protein [Williamwhitmania taraxaci]	tig00002064_pilon_C.paspali	5058866	5059530
g13073.t1	Y(0.911)	-	Cytoplasmiceffector	gb|KEQ62485.1|	136	136	1	136	136	14	0	0	2.89e-79	histone-fold-containing protein [Aureobasidium melanogenum CBS 110374]	tig00002064_pilon_C.paspali	5064118	5064692
g13073.t1	Y(0.911)	-	Cytoplasmiceffector	gb|KIN00969.1|	136	132	1	136	136	5	3	4	4.42e-79	hypothetical protein OIDMADRAFT_19043 [Oidiodendron maius Zn]	tig00002064_pilon_C.paspali	5064118	5064692
g13073.t1	Y(0.911)	-	Cytoplasmiceffector	gb|KKY15017.1|	136	132	1	126	126	4	1	1	6.01e-79	putative histone h2a [Phaeomoniella chlamydospora]	tig00002064_pilon_C.paspali	5064118	5064692
g13073.t1	Y(0.911)	-	Cytoplasmiceffector	gb|PQE13301.1|	136	135	4	136	133	2	0	0	1.44e-87	Histone H2A protein [Rutstroemia sp. NJR-2017a BVV2]	tig00002064_pilon_C.paspali	5064118	5064692
g13073.t1	Y(0.911)	-	Cytoplasmiceffector	gb|PQE14511.1|	136	136	1	136	136	2	0	0	6.3e-90	Histone H2A protein [Rutstroemia sp. NJR-2017a BBW]	tig00002064_pilon_C.paspali	5064118	5064692
g13073.t1	Y(0.911)	-	Cytoplasmiceffector	ref|XP_007931424.1|	136	137	1	131	131	6	1	3	5.7e-79	hypothetical protein MYCFIDRAFT_168270 [Pseudocercospora fijiensis CIRAD86]	tig00002064_pilon_C.paspali	5064118	5064692
g13073.t1	Y(0.911)	-	Cytoplasmiceffector	ref|XP_009158759.1|	136	131	1	136	136	4	3	5	6.56e-79	histone H2A [Exophiala dermatitidis NIH/UT8656]	tig00002064_pilon_C.paspali	5064118	5064692
g13073.t1	Y(0.911)	-	Cytoplasmiceffector	ref|XP_009259038.1|	136	134	3	136	134	5	2	3	8.72e-80	hypothetical protein FPSE_07645 [Fusarium pseudograminearum CS3096]	tig00002064_pilon_C.paspali	5064118	5064692
g13073.t1	Y(0.911)	-	Cytoplasmiceffector	ref|XP_018064945.1|	136	134	1	136	136	7	1	2	1.1e-82	histone-fold-containing protein [Phialocephala scopiformis]	tig00002064_pilon_C.paspali	5064118	5064692
g13073.t1	Y(0.911)	-	Cytoplasmiceffector	ref|XP_023455140.1|	136	137	1	131	131	6	1	3	9.97e-79	Histone H2A [Cercospora beticola]	tig00002064_pilon_C.paspali	5064118	5064692
g13074.t1	Y(0.915)	-	Cytoplasmiceffector	emb|CZR57392.1|	99	99	1	99	99	15	0	0	1.31e-56	related to NADH2 dehydrogenase (ubiquinone) chain CI-B22 [Phialocephala subalpina]	tig00002064_pilon_C.paspali	5065158	5065674
g13074.t1	Y(0.915)	-	Cytoplasmiceffector	gb|APA14191.1|	99	99	1	99	99	12	0	0	5.68e-57	hypothetical protein sscle_12g089610 [Sclerotinia sclerotiorum 1980 UF-70]	tig00002064_pilon_C.paspali	5065158	5065674
g13074.t1	Y(0.915)	-	Cytoplasmiceffector	gb|PMD14104.1|	99	99	1	99	99	16	0	0	7.47e-57	hypothetical protein NA56DRAFT_611305 [Pezoloma ericae]	tig00002064_pilon_C.paspali	5065158	5065674
g13074.t1	Y(0.915)	-	Cytoplasmiceffector	gb|PMD42552.1|	99	99	1	99	99	15	0	0	4.76e-57	hypothetical protein L207DRAFT_510773 [Hyaloscypha variabilis F]	tig00002064_pilon_C.paspali	5065158	5065674
g13074.t1	Y(0.915)	-	Cytoplasmiceffector	gb|PQE14545.1|	99	128	1	92	96	5	1	4	3.17e-56	hypothetical protein CJF30_00007145 [Rutstroemia sp. NJR-2017a BBW]	tig00002064_pilon_C.paspali	5065158	5065674
g13074.t1	Y(0.915)	-	Cytoplasmiceffector	gb|PQE32480.1|	99	123	1	92	96	6	1	4	4.42e-56	hypothetical protein CJF32_00001241 [Rutstroemia sp. NJR-2017a WRK4]	tig00002064_pilon_C.paspali	5065158	5065674
g13074.t1	Y(0.915)	-	Cytoplasmiceffector	gb|RAL61915.1|	99	99	1	99	99	13	0	0	8.15e-57	hypothetical protein DID88_002404 [Monilinia fructigena]	tig00002064_pilon_C.paspali	5065158	5065674
g13074.t1	Y(0.915)	-	Cytoplasmiceffector	gb|TGO41833.1|	99	99	1	99	99	13	0	0	7.89e-57	hypothetical protein BHYA_0016g00020 [Botrytis hyacinthi]	tig00002064_pilon_C.paspali	5065158	5065674
g13074.t1	Y(0.915)	-	Cytoplasmiceffector	ref|XP_018064944.1|	99	99	1	99	99	17	0	0	1.1e-55	hypothetical protein LY89DRAFT_689254 [Phialocephala scopiformis]	tig00002064_pilon_C.paspali	5065158	5065674
g13074.t1	Y(0.915)	-	Cytoplasmiceffector	ref|XP_024744073.1|	99	99	1	99	99	15	0	0	5.61e-57	hypothetical protein K444DRAFT_7498 [Meliniomyces bicolor E]	tig00002064_pilon_C.paspali	5065158	5065674
g13142.t1	Y(0.924)	-	Cytoplasmiceffector	emb|CDE07475.1|	87	210	4	65	62	33	2	8	8.1	unknown [Bacillus sp. CAG:988]	tig00002064_pilon_C.paspali	5534124	5534387
g13142.t1	Y(0.924)	-	Cytoplasmiceffector	gb|PWL72474.1|	87	210	4	65	62	33	2	8	8.6	hypothetical protein DBY23_01600 [Firmicutes bacterium]	tig00002064_pilon_C.paspali	5534124	5534387
g13142.t1	Y(0.924)	-	Cytoplasmiceffector	gb|RDW73697.1|	87	728	42	74	33	18	0	0	5.8	C2H2 and C2HC zinc finger-2 [Coleophoma crateriformis]	tig00002064_pilon_C.paspali	5534124	5534387
g13142.t1	Y(0.924)	-	Cytoplasmiceffector	ref|WP_107729881.1|	87	730	13	85	73	52	2	2	2.3	methionine--tRNA ligase [Nitrosospira sp. Nsp22]	tig00002064_pilon_C.paspali	5534124	5534387
g13206.t1	Y(0.909)	-	Cytoplasmiceffector	gb|ESZ92792.1|	187	189	1	187	191	19	2	6	1.02e-118	nucleoside diphosphate kinase [Sclerotinia borealis F-4128]	tig00002064_pilon_C.paspali	5717697	5718660
g13206.t1	Y(0.909)	-	Cytoplasmiceffector	gb|PQE23763.1|	187	191	1	187	191	10	1	4	7.07e-129	nucleoside diphosphate kinase protein [Rutstroemia sp. NJR-2017a BBW]	tig00002064_pilon_C.paspali	5717697	5718660
g13206.t1	Y(0.909)	-	Cytoplasmiceffector	gb|RAL62838.1|	187	186	1	187	188	15	2	3	3e-121	hypothetical protein DID88_004680 [Monilinia fructigena]	tig00002064_pilon_C.paspali	5717697	5718660
g13206.t1	Y(0.909)	-	Cytoplasmiceffector	gb|TEY68077.1|	187	189	1	187	191	17	2	6	9.58e-120	hypothetical protein BOTCAL_0123g00060 [Botryotinia calthae]	tig00002064_pilon_C.paspali	5717697	5718660
g13206.t1	Y(0.909)	-	Cytoplasmiceffector	gb|TGO13488.1|	187	189	1	187	191	17	2	6	9.38e-119	hypothetical protein BTUL_0069g00550 [Botrytis tulipae]	tig00002064_pilon_C.paspali	5717697	5718660
g13206.t1	Y(0.909)	-	Cytoplasmiceffector	gb|TGO24988.1|	187	189	1	187	191	15	2	6	3.53e-120	hypothetical protein BPAE_0090g00320 [Botrytis paeoniae]	tig00002064_pilon_C.paspali	5717697	5718660
g13206.t1	Y(0.909)	-	Cytoplasmiceffector	gb|TGO55741.1|	187	189	1	187	191	17	2	6	1.75e-118	hypothetical protein BOTNAR_0238g00090 [Botryotinia narcissicola]	tig00002064_pilon_C.paspali	5717697	5718660
g13206.t1	Y(0.909)	-	Cytoplasmiceffector	gb|TGO63699.1|	187	189	1	187	191	16	2	6	1.07e-119	hypothetical protein BCON_0011g00400 [Botryotinia convoluta]	tig00002064_pilon_C.paspali	5717697	5718660
g13206.t1	Y(0.909)	-	Cytoplasmiceffector	gb|TGO84499.1|	187	189	1	187	191	17	2	6	3.2e-119	hypothetical protein BPOR_0497g00010 [Botrytis porri]	tig00002064_pilon_C.paspali	5717697	5718660
g13206.t1	Y(0.909)	-	Cytoplasmiceffector	ref|XP_024546868.1|	187	189	1	187	191	17	2	6	2.54e-119	Bcynk1 [Botrytis cinerea B05.10]	tig00002064_pilon_C.paspali	5717697	5718660
g13211.t1	Y(0.935)	Y(0.582)	Cytoplasmic/apoplasticeffector	emb|CCD48424.1|	129	114	1	106	106	56	1	1	2e-22	hypothetical protein BofuT4_P108080.1 [Botrytis cinerea T4]	tig00002064_pilon_C.paspali	5727818	5728260
g13211.t1	Y(0.935)	Y(0.582)	Cytoplasmic/apoplasticeffector	gb|ESZ92786.1|	129	100	37	121	85	43	1	1	1.69e-16	hypothetical protein SBOR_6843 [Sclerotinia borealis F-4128]	tig00002064_pilon_C.paspali	5727818	5728260
g13211.t1	Y(0.935)	Y(0.582)	Cytoplasmic/apoplasticeffector	gb|PQE28496.1|	129	169	1	113	113	36	0	0	1.58e-46	hypothetical protein CJF32_00005600 [Rutstroemia sp. NJR-2017a WRK4]	tig00002064_pilon_C.paspali	5727818	5728260
g13211.t1	Y(0.935)	Y(0.582)	Cytoplasmic/apoplasticeffector	gb|TEY68072.1|	129	132	1	126	126	68	1	1	5e-30	hypothetical protein BOTCAL_0123g00010 [Botryotinia calthae]	tig00002064_pilon_C.paspali	5727818	5728260
g13211.t1	Y(0.935)	Y(0.582)	Cytoplasmic/apoplasticeffector	gb|TGO24993.1|	129	137	1	126	126	70	1	1	2.23e-29	hypothetical protein BPAE_0090g00370 [Botrytis paeoniae]	tig00002064_pilon_C.paspali	5727818	5728260
g13211.t1	Y(0.935)	Y(0.582)	Cytoplasmic/apoplasticeffector	gb|TGO63704.1|	129	137	1	126	126	67	1	1	1.33e-30	hypothetical protein BCON_0011g00450 [Botryotinia convoluta]	tig00002064_pilon_C.paspali	5727818	5728260
g13211.t1	Y(0.935)	Y(0.582)	Cytoplasmic/apoplasticeffector	gb|TGO71714.1|	129	138	1	126	126	66	1	1	1.4e-30	hypothetical protein BELL_0539g00070 [Botrytis elliptica]	tig00002064_pilon_C.paspali	5727818	5728260
g13211.t1	Y(0.935)	Y(0.582)	Cytoplasmic/apoplasticeffector	gb|TGO84504.1|	129	138	1	126	126	65	1	1	1.05e-31	hypothetical protein BPOR_0497g00060 [Botrytis porri]	tig00002064_pilon_C.paspali	5727818	5728260
g13211.t1	Y(0.935)	Y(0.582)	Cytoplasmic/apoplasticeffector	ref|XP_001555955.2|	129	132	1	126	126	66	1	1	2.78e-31	hypothetical protein BCIN_02g01110 [Botrytis cinerea B05.10]	tig00002064_pilon_C.paspali	5727818	5728260
g13211.t1	Y(0.935)	Y(0.582)	Cytoplasmic/apoplasticeffector	ref|XP_024546872.1|	129	114	1	126	126	52	2	19	7.62e-24	hypothetical protein BCIN_02g01110 [Botrytis cinerea B05.10]	tig00002064_pilon_C.paspali	5727818	5728260
g1326.t1	Y(0.98)	-	Cytoplasmiceffector	gb|KIM66768.1|	90	574	25	89	65	37	1	6	2	hypothetical protein SCLCIDRAFT_109694 [Scleroderma citrinum Foug A]	tig00000001_pilon_C.paspali	4374968	4375240
g1326.t1	Y(0.98)	-	Cytoplasmiceffector	gb|OIP22094.1|	90	513	44	76	33	20	0	0	9.1	mercuric reductase [bacterium CG2_30_54_10]	tig00000001_pilon_C.paspali	4374968	4375240
g1326.t1	Y(0.98)	-	Cytoplasmiceffector	ref|WP_007175026.1|	90	1594	36	89	54	34	1	2	3	hypothetical protein [Prevotella bergensis]	tig00000001_pilon_C.paspali	4374968	4375240
g1326.t1	Y(0.98)	-	Cytoplasmiceffector	ref|WP_080427070.1|	90	352	3	73	79	42	3	9	1.4	hypothetical protein [Burkholderia ubonensis]	tig00000001_pilon_C.paspali	4374968	4375240
g1326.t1	Y(0.98)	-	Cytoplasmiceffector	ref|WP_113483790.1|	90	865	8	89	96	47	4	19	5.5	PAS domain-containing hybrid sensor histidine kinase/response regulator [Rhizobiales bacterium]	tig00000001_pilon_C.paspali	4374968	4375240
g13286.t1	Y(0.962)	-	Cytoplasmiceffector	gb|APA15059.1|	269	247	2	263	263	92	4	19	1.13e-88	hypothetical protein sscle_14g098290 [Sclerotinia sclerotiorum 1980 UF-70]	tig00025236_pilon_C.paspali	30128	31331
g13286.t1	Y(0.962)	-	Cytoplasmiceffector	gb|ESZ91139.1|	269	254	2	263	263	99	4	12	1.09e-84	hypothetical protein SBOR_8473 [Sclerotinia borealis F-4128]	tig00025236_pilon_C.paspali	30128	31331
g13286.t1	Y(0.962)	-	Cytoplasmiceffector	gb|PQE08210.1|	269	263	1	265	265	54	1	3	1.4e-138	RNAse p and RNAse mrp subunit protein [Rutstroemia sp. NJR-2017a WRK4]	tig00025236_pilon_C.paspali	30128	31331
g13286.t1	Y(0.962)	-	Cytoplasmiceffector	gb|PQE10780.1|	269	263	1	265	265	54	1	3	1.12e-138	RNAse p and RNAse mrp subunit protein [Rutstroemia sp. NJR-2017a BBW]	tig00025236_pilon_C.paspali	30128	31331
g13286.t1	Y(0.962)	-	Cytoplasmiceffector	gb|PQE21163.1|	269	245	23	266	244	52	1	3	5.01e-121	RNAse p and RNAse mrp subunit protein [Rutstroemia sp. NJR-2017a BVV2]	tig00025236_pilon_C.paspali	30128	31331
g13286.t1	Y(0.962)	-	Cytoplasmiceffector	gb|RDW59731.1|	269	269	1	266	278	114	5	23	2.26e-82	hypothetical protein BP6252_12818 [Coleophoma cylindrospora]	tig00025236_pilon_C.paspali	30128	31331
g13286.t1	Y(0.962)	-	Cytoplasmiceffector	gb|RDW65442.1|	269	269	1	256	267	106	5	21	2.61e-82	hypothetical protein BP5796_10134 [Coleophoma crateriformis]	tig00025236_pilon_C.paspali	30128	31331
g13286.t1	Y(0.962)	-	Cytoplasmiceffector	gb|TGO56258.1|	269	251	1	263	265	104	5	16	1e-82	hypothetical protein BCON_0080g00160 [Botryotinia convoluta]	tig00025236_pilon_C.paspali	30128	31331
g13286.t1	Y(0.962)	-	Cytoplasmiceffector	gb|THV46693.1|	269	251	1	263	265	105	5	16	2.31e-82	hypothetical protein BGAL_0367g00090 [Botrytis galanthina]	tig00025236_pilon_C.paspali	30128	31331
g13286.t1	Y(0.962)	-	Cytoplasmiceffector	ref|XP_001551141.2|	269	251	1	263	265	105	6	16	1.93e-83	hypothetical protein BCIN_16g01070 [Botrytis cinerea B05.10]	tig00025236_pilon_C.paspali	30128	31331
g13301.t1	Y(0.919)	-	Cytoplasmiceffector	gb|KJV97056.1|	118	427	16	67	52	32	1	1	0.81	ulp1 protease family, C-terminal catalytic domain protein [Orientia tsutsugamushi str. UT76]	tig00025236_pilon_C.paspali	72663	73069
g13301.t1	Y(0.919)	-	Cytoplasmiceffector	gb|KJW01665.1|	118	478	16	78	64	41	2	2	2.5	ulp1 protease family, C-terminal catalytic domain protein [Orientia tsutsugamushi str. Sido]	tig00025236_pilon_C.paspali	72663	73069
g13301.t1	Y(0.919)	-	Cytoplasmiceffector	gb|MBO94098.1|	118	503	54	89	36	22	0	0	1.1	hypothetical protein [Opitutales bacterium]	tig00025236_pilon_C.paspali	72663	73069
g13301.t1	Y(0.919)	-	Cytoplasmiceffector	gb|PSR80912.1|	118	329	44	109	69	42	3	6	1	hypothetical protein BD289DRAFT_439848 [Coniella lustricola]	tig00025236_pilon_C.paspali	72663	73069
g13301.t1	Y(0.919)	-	Cytoplasmiceffector	ref|WP_011944731.1|	118	1371	16	78	64	41	2	2	4.5	hypothetical protein [Orientia tsutsugamushi]	tig00025236_pilon_C.paspali	72663	73069
g13301.t1	Y(0.919)	-	Cytoplasmiceffector	ref|WP_045914311.1|	118	1369	16	78	64	40	2	2	1.5	hypothetical protein [Orientia tsutsugamushi]	tig00025236_pilon_C.paspali	72663	73069
g13301.t1	Y(0.919)	-	Cytoplasmiceffector	ref|WP_108839530.1|	118	1372	16	67	52	33	1	1	3	hypothetical protein [Orientia tsutsugamushi]	tig00025236_pilon_C.paspali	72663	73069
g13301.t1	Y(0.919)	-	Cytoplasmiceffector	ref|WP_109227152.1|	118	1373	16	67	52	32	1	1	1	hypothetical protein [Orientia tsutsugamushi]	tig00025236_pilon_C.paspali	72663	73069
g13301.t1	Y(0.919)	-	Cytoplasmiceffector	ref|XP_020433221.1|	118	681	29	98	70	38	4	5	2.6	sentrin/SUMO-specific protease [Heterostelium album PN500]	tig00025236_pilon_C.paspali	72663	73069
g13301.t1	Y(0.919)	-	Cytoplasmiceffector	ref|XP_026815956.1|	118	633	45	111	71	39	3	6	0.81	uncharacterized protein LOC113555670 [Rhopalosiphum maidis]	tig00025236_pilon_C.paspali	72663	73069
g13319.t1	Y(0.942)	-	Cytoplasmiceffector	gb|APA10235.1|	164	360	1	144	144	19	0	0	2.08e-85	hypothetical protein sscle_06g050050 [Sclerotinia sclerotiorum 1980 UF-70]	tig00025238_pilon_C.paspali	18729	19332
g13319.t1	Y(0.942)	-	Cytoplasmiceffector	gb|ESZ90242.1|	164	360	1	144	144	14	0	0	1.52e-90	putative Uncharacterized oxidoreductase yvaA [Sclerotinia borealis F-4128]	tig00025238_pilon_C.paspali	18729	19332
g13319.t1	Y(0.942)	-	Cytoplasmiceffector	gb|PQE04148.1|	164	360	1	144	144	7	0	0	1.92e-87	hypothetical protein CJF31_00002072 [Rutstroemia sp. NJR-2017a BVV2]	tig00025238_pilon_C.paspali	18729	19332
g13319.t1	Y(0.942)	-	Cytoplasmiceffector	gb|PQE12888.1|	164	346	15	145	131	5	0	0	9.24e-86	hypothetical protein CJF30_00002800 [Rutstroemia sp. NJR-2017a BBW]	tig00025238_pilon_C.paspali	18729	19332
g13319.t1	Y(0.942)	-	Cytoplasmiceffector	gb|TEY37438.1|	164	360	1	144	144	22	0	0	2.57e-84	hypothetical protein BOTCAL_0518g00070 [Botryotinia calthae]	tig00025238_pilon_C.paspali	18729	19332
g13319.t1	Y(0.942)	-	Cytoplasmiceffector	gb|TGO28757.1|	164	360	1	144	144	24	0	0	4.08e-85	hypothetical protein BPAE_0023g00220 [Botrytis paeoniae]	tig00025238_pilon_C.paspali	18729	19332
g13319.t1	Y(0.942)	-	Cytoplasmiceffector	gb|TGO62784.1|	164	360	1	144	144	22	0	0	6.99e-86	hypothetical protein BCON_0017g00250 [Botryotinia convoluta]	tig00025238_pilon_C.paspali	18729	19332
g13319.t1	Y(0.942)	-	Cytoplasmiceffector	gb|TGO63028.1|	164	360	1	144	144	23	0	0	3.45e-84	hypothetical protein BOTNAR_0106g00240 [Botryotinia narcissicola]	tig00025238_pilon_C.paspali	18729	19332
g13319.t1	Y(0.942)	-	Cytoplasmiceffector	gb|TGO89302.1|	164	360	1	144	144	22	0	0	2.91e-85	hypothetical protein BPOR_0115g00070 [Botrytis porri]	tig00025238_pilon_C.paspali	18729	19332
g13319.t1	Y(0.942)	-	Cytoplasmiceffector	ref|XP_001546850.1|	164	360	1	144	144	22	0	0	1.04e-85	hypothetical protein BCIN_10g02060 [Botrytis cinerea B05.10]	tig00025238_pilon_C.paspali	18729	19332
g13363.t1	Y(0.909)	-	Cytoplasmiceffector	gb|APA07456.1|	95	95	1	95	95	14	0	0	2.72e-55	hypothetical protein sscle_03g022260 [Sclerotinia sclerotiorum 1980 UF-70]	tig00025243_pilon_C.paspali	267857	268251
g13363.t1	Y(0.909)	-	Cytoplasmiceffector	gb|EMR91167.1|	95	120	1	95	95	17	0	0	1.25e-52	putative nadh-ubiquinone oxidoreductase b18 protein [Botrytis cinerea BcDW1]	tig00025243_pilon_C.paspali	267857	268251
g13363.t1	Y(0.909)	-	Cytoplasmiceffector	gb|ESZ98198.1|	95	95	1	95	95	17	0	0	2.1e-53	putative NADH-ubiquinone oxidoreductase B18 subunit [Sclerotinia borealis F-4128]	tig00025243_pilon_C.paspali	267857	268251
g13363.t1	Y(0.909)	-	Cytoplasmiceffector	gb|PQE19283.1|	95	103	1	95	103	3	1	8	1.34e-59	hypothetical protein CJF31_00009350 [Rutstroemia sp. NJR-2017a BVV2]	tig00025243_pilon_C.paspali	267857	268251
g13363.t1	Y(0.909)	-	Cytoplasmiceffector	gb|PQE26604.1|	95	95	1	95	95	3	0	0	1.66e-62	hypothetical protein CJF30_00001336 [Rutstroemia sp. NJR-2017a BBW]	tig00025243_pilon_C.paspali	267857	268251
g13363.t1	Y(0.909)	-	Cytoplasmiceffector	gb|TGO48195.1|	95	118	1	95	95	17	0	0	9.31e-53	hypothetical protein BOTNAR_0488g00040 [Botryotinia narcissicola]	tig00025243_pilon_C.paspali	267857	268251
g13363.t1	Y(0.909)	-	Cytoplasmiceffector	gb|TGO49457.1|	95	95	1	95	95	17	0	0	1.39e-52	hypothetical protein BCON_0209g00030 [Botryotinia convoluta]	tig00025243_pilon_C.paspali	267857	268251
g13363.t1	Y(0.909)	-	Cytoplasmiceffector	gb|TGO85454.1|	95	95	1	95	95	17	0	0	7.2e-53	hypothetical protein BPOR_0395g00130 [Botrytis porri]	tig00025243_pilon_C.paspali	267857	268251
g13363.t1	Y(0.909)	-	Cytoplasmiceffector	gb|THV45646.1|	95	95	1	95	95	17	0	0	7.6e-53	hypothetical protein BGAL_0465g00090 [Botrytis galanthina]	tig00025243_pilon_C.paspali	267857	268251
g13363.t1	Y(0.909)	-	Cytoplasmiceffector	ref|XP_001547587.1|	95	95	1	95	95	17	0	0	7.2e-53	hypothetical protein BCIN_14g00100 [Botrytis cinerea B05.10]	tig00025243_pilon_C.paspali	267857	268251
g1338.t1	Y(0.933)	-	Cytoplasmiceffector	gb|OWF44804.1|	246	403	20	242	223	142	1	1	8.84e-25	Hemogen [Mizuhopecten yessoensis]	tig00000001_pilon_C.paspali	4415676	4416416
g1338.t1	Y(0.933)	-	Cytoplasmiceffector	gb|OWF44804.1|	246	403	20	242	223	144	1	1	1.09e-22	Hemogen [Mizuhopecten yessoensis]	tig00000001_pilon_C.paspali	4415676	4416416
g1338.t1	Y(0.933)	-	Cytoplasmiceffector	gb|OWF44804.1|	246	403	20	242	223	144	1	1	9.18e-22	Hemogen [Mizuhopecten yessoensis]	tig00000001_pilon_C.paspali	4415676	4416416
g1338.t1	Y(0.933)	-	Cytoplasmiceffector	gb|OWF44804.1|	246	403	20	242	237	143	3	15	2.02e-23	Hemogen [Mizuhopecten yessoensis]	tig00000001_pilon_C.paspali	4415676	4416416
g1338.t1	Y(0.933)	-	Cytoplasmiceffector	gb|OWF44804.1|	246	403	20	242	251	140	2	29	1.07e-23	Hemogen [Mizuhopecten yessoensis]	tig00000001_pilon_C.paspali	4415676	4416416
g1338.t1	Y(0.933)	-	Cytoplasmiceffector	gb|OWF44804.1|	246	403	20	242	251	140	2	29	4.06e-23	Hemogen [Mizuhopecten yessoensis]	tig00000001_pilon_C.paspali	4415676	4416416
g1338.t1	Y(0.933)	-	Cytoplasmiceffector	gb|OWF44804.1|	246	403	20	242	251	141	2	29	4.96e-22	Hemogen [Mizuhopecten yessoensis]	tig00000001_pilon_C.paspali	4415676	4416416
g1338.t1	Y(0.933)	-	Cytoplasmiceffector	gb|OWF44804.1|	246	403	29	234	206	129	1	1	4.03e-25	Hemogen [Mizuhopecten yessoensis]	tig00000001_pilon_C.paspali	4415676	4416416
g1338.t1	Y(0.933)	-	Cytoplasmiceffector	gb|OWF44804.1|	246	403	44	242	199	126	0	0	4.94e-25	Hemogen [Mizuhopecten yessoensis]	tig00000001_pilon_C.paspali	4415676	4416416
g1338.t1	Y(0.933)	-	Cytoplasmiceffector	gb|OWF44804.1|	246	403	44	242	199	127	0	0	5.55e-22	Hemogen [Mizuhopecten yessoensis]	tig00000001_pilon_C.paspali	4415676	4416416
g1338.t1	Y(0.933)	-	Cytoplasmiceffector	gb|PSX45530.1|	246	303	20	235	216	168	1	1	9e-37	hypothetical protein C0W53_05735, partial [Photobacterium kishitanii]	tig00000001_pilon_C.paspali	4415676	4416416
g1338.t1	Y(0.933)	-	Cytoplasmiceffector	gb|PSX45530.1|	246	303	20	245	226	177	1	1	3.96e-38	hypothetical protein C0W53_05735, partial [Photobacterium kishitanii]	tig00000001_pilon_C.paspali	4415676	4416416
g1338.t1	Y(0.933)	-	Cytoplasmiceffector	gb|PSX45530.1|	246	303	20	245	226	177	1	1	5.5e-39	hypothetical protein C0W53_05735, partial [Photobacterium kishitanii]	tig00000001_pilon_C.paspali	4415676	4416416
g1338.t1	Y(0.933)	-	Cytoplasmiceffector	gb|RDL36289.1|	246	97	105	172	69	9	1	1	1.55e-28	Uncharacterized protein BP5553_05641 [Phialophora cf. hyalina BP 5553]	tig00000001_pilon_C.paspali	4415676	4416416
g1338.t1	Y(0.933)	-	Cytoplasmiceffector	gb|RDL36289.1|	246	97	119	186	69	9	1	1	1.55e-28	Uncharacterized protein BP5553_05641 [Phialophora cf. hyalina BP 5553]	tig00000001_pilon_C.paspali	4415676	4416416
g1338.t1	Y(0.933)	-	Cytoplasmiceffector	gb|RDL36289.1|	246	97	133	200	69	9	1	1	1.55e-28	Uncharacterized protein BP5553_05641 [Phialophora cf. hyalina BP 5553]	tig00000001_pilon_C.paspali	4415676	4416416
g1338.t1	Y(0.933)	-	Cytoplasmiceffector	gb|RDL36289.1|	246	97	147	214	69	9	1	1	1.55e-28	Uncharacterized protein BP5553_05641 [Phialophora cf. hyalina BP 5553]	tig00000001_pilon_C.paspali	4415676	4416416
g1338.t1	Y(0.933)	-	Cytoplasmiceffector	gb|RDL36289.1|	246	97	161	228	69	9	1	1	1.55e-28	Uncharacterized protein BP5553_05641 [Phialophora cf. hyalina BP 5553]	tig00000001_pilon_C.paspali	4415676	4416416
g1338.t1	Y(0.933)	-	Cytoplasmiceffector	gb|RDL36289.1|	246	97	175	242	69	9	1	1	1.55e-28	Uncharacterized protein BP5553_05641 [Phialophora cf. hyalina BP 5553]	tig00000001_pilon_C.paspali	4415676	4416416
g1338.t1	Y(0.933)	-	Cytoplasmiceffector	gb|RDL36289.1|	246	97	1	88	88	9	0	0	2.64e-46	Uncharacterized protein BP5553_05641 [Phialophora cf. hyalina BP 5553]	tig00000001_pilon_C.paspali	4415676	4416416
g1338.t1	Y(0.933)	-	Cytoplasmiceffector	gb|RDL36289.1|	246	97	189	243	56	5	1	1	9.29e-21	Uncharacterized protein BP5553_05641 [Phialophora cf. hyalina BP 5553]	tig00000001_pilon_C.paspali	4415676	4416416
g1338.t1	Y(0.933)	-	Cytoplasmiceffector	gb|RDL36289.1|	246	97	203	246	45	5	1	1	5.82e-12	Uncharacterized protein BP5553_05641 [Phialophora cf. hyalina BP 5553]	tig00000001_pilon_C.paspali	4415676	4416416
g1338.t1	Y(0.933)	-	Cytoplasmiceffector	gb|RDL36289.1|	246	97	77	144	69	9	1	1	1.55e-28	Uncharacterized protein BP5553_05641 [Phialophora cf. hyalina BP 5553]	tig00000001_pilon_C.paspali	4415676	4416416
g1338.t1	Y(0.933)	-	Cytoplasmiceffector	gb|RDL36289.1|	246	97	91	158	69	9	1	1	1.55e-28	Uncharacterized protein BP5553_05641 [Phialophora cf. hyalina BP 5553]	tig00000001_pilon_C.paspali	4415676	4416416
g1338.t1	Y(0.933)	-	Cytoplasmiceffector	gb|ROL48916.1|	246	427	23	235	213	150	1	1	1.79e-26	C-type lectin domain family 4 member F [Anabarilius grahami]	tig00000001_pilon_C.paspali	4415676	4416416
g1338.t1	Y(0.933)	-	Cytoplasmiceffector	gb|ROL48916.1|	246	427	23	246	224	159	1	1	1.87e-27	C-type lectin domain family 4 member F [Anabarilius grahami]	tig00000001_pilon_C.paspali	4415676	4416416
g1338.t1	Y(0.933)	-	Cytoplasmiceffector	gb|ROL48916.1|	246	427	23	246	224	159	1	1	1.87e-27	C-type lectin domain family 4 member F [Anabarilius grahami]	tig00000001_pilon_C.paspali	4415676	4416416
g1338.t1	Y(0.933)	-	Cytoplasmiceffector	gb|ROL48916.1|	246	427	23	246	224	159	1	1	1.87e-27	C-type lectin domain family 4 member F [Anabarilius grahami]	tig00000001_pilon_C.paspali	4415676	4416416
g1338.t1	Y(0.933)	-	Cytoplasmiceffector	gb|ROL48916.1|	246	427	23	246	224	159	1	1	1.87e-27	C-type lectin domain family 4 member F [Anabarilius grahami]	tig00000001_pilon_C.paspali	4415676	4416416
g1338.t1	Y(0.933)	-	Cytoplasmiceffector	gb|ROL48916.1|	246	427	23	246	224	159	1	1	1.87e-27	C-type lectin domain family 4 member F [Anabarilius grahami]	tig00000001_pilon_C.paspali	4415676	4416416
g1338.t1	Y(0.933)	-	Cytoplasmiceffector	gb|ROL48916.1|	246	427	23	246	224	159	1	1	1.87e-27	C-type lectin domain family 4 member F [Anabarilius grahami]	tig00000001_pilon_C.paspali	4415676	4416416
g1338.t1	Y(0.933)	-	Cytoplasmiceffector	gb|ROL48916.1|	246	427	23	246	224	159	1	1	1.87e-27	C-type lectin domain family 4 member F [Anabarilius grahami]	tig00000001_pilon_C.paspali	4415676	4416416
g1338.t1	Y(0.933)	-	Cytoplasmiceffector	gb|ROL48916.1|	246	427	23	246	224	159	1	1	1.87e-27	C-type lectin domain family 4 member F [Anabarilius grahami]	tig00000001_pilon_C.paspali	4415676	4416416
g1338.t1	Y(0.933)	-	Cytoplasmiceffector	gb|ROL48916.1|	246	427	23	246	224	159	1	1	1.87e-27	C-type lectin domain family 4 member F [Anabarilius grahami]	tig00000001_pilon_C.paspali	4415676	4416416
g1338.t1	Y(0.933)	-	Cytoplasmiceffector	gb|ROL48916.1|	246	427	23	246	224	159	1	1	1.87e-27	C-type lectin domain family 4 member F [Anabarilius grahami]	tig00000001_pilon_C.paspali	4415676	4416416
g1338.t1	Y(0.933)	-	Cytoplasmiceffector	gb|ROL48916.1|	246	427	23	246	224	159	1	1	1.87e-27	C-type lectin domain family 4 member F [Anabarilius grahami]	tig00000001_pilon_C.paspali	4415676	4416416
g1338.t1	Y(0.933)	-	Cytoplasmiceffector	gb|ROL48916.1|	246	427	23	246	224	159	1	1	1.87e-27	C-type lectin domain family 4 member F [Anabarilius grahami]	tig00000001_pilon_C.paspali	4415676	4416416
g1338.t1	Y(0.933)	-	Cytoplasmiceffector	gb|ROL48916.1|	246	427	23	246	224	159	1	1	1.87e-27	C-type lectin domain family 4 member F [Anabarilius grahami]	tig00000001_pilon_C.paspali	4415676	4416416
g1338.t1	Y(0.933)	-	Cytoplasmiceffector	gb|ROL48916.1|	246	427	23	246	224	160	1	1	2.32e-25	C-type lectin domain family 4 member F [Anabarilius grahami]	tig00000001_pilon_C.paspali	4415676	4416416
g1338.t1	Y(0.933)	-	Cytoplasmiceffector	gb|ROL48916.1|	246	427	36	246	211	150	0	0	6.35e-27	C-type lectin domain family 4 member F [Anabarilius grahami]	tig00000001_pilon_C.paspali	4415676	4416416
g1338.t1	Y(0.933)	-	Cytoplasmiceffector	gb|RXM97286.1|	246	494	116	243	128	82	0	0	4.27e-17	Growth/differentiation factor 11 [Acipenser ruthenus]	tig00000001_pilon_C.paspali	4415676	4416416
g1338.t1	Y(0.933)	-	Cytoplasmiceffector	gb|RXM97286.1|	246	494	31	200	170	108	1	1	1.7e-23	Growth/differentiation factor 11 [Acipenser ruthenus]	tig00000001_pilon_C.paspali	4415676	4416416
g1338.t1	Y(0.933)	-	Cytoplasmiceffector	gb|RXM97286.1|	246	494	46	214	169	109	0	0	1.69e-24	Growth/differentiation factor 11 [Acipenser ruthenus]	tig00000001_pilon_C.paspali	4415676	4416416
g1338.t1	Y(0.933)	-	Cytoplasmiceffector	gb|RXM97286.1|	246	494	60	228	169	109	0	0	1.69e-24	Growth/differentiation factor 11 [Acipenser ruthenus]	tig00000001_pilon_C.paspali	4415676	4416416
g1338.t1	Y(0.933)	-	Cytoplasmiceffector	gb|RXM97286.1|	246	494	74	242	169	109	0	0	1.69e-24	Growth/differentiation factor 11 [Acipenser ruthenus]	tig00000001_pilon_C.paspali	4415676	4416416
g1338.t1	Y(0.933)	-	Cytoplasmiceffector	gb|THC99806.1|	246	105	105	190	86	7	0	0	9.74e-43	hypothetical protein EYZ11_000736 [Aspergillus tanneri]	tig00000001_pilon_C.paspali	4415676	4416416
g1338.t1	Y(0.933)	-	Cytoplasmiceffector	gb|THC99806.1|	246	105	1	120	120	20	1	15	9.38e-46	hypothetical protein EYZ11_000736 [Aspergillus tanneri]	tig00000001_pilon_C.paspali	4415676	4416416
g1338.t1	Y(0.933)	-	Cytoplasmiceffector	gb|THC99806.1|	246	105	119	204	86	7	0	0	9.74e-43	hypothetical protein EYZ11_000736 [Aspergillus tanneri]	tig00000001_pilon_C.paspali	4415676	4416416
g1338.t1	Y(0.933)	-	Cytoplasmiceffector	gb|THC99806.1|	246	105	133	218	86	7	0	0	9.74e-43	hypothetical protein EYZ11_000736 [Aspergillus tanneri]	tig00000001_pilon_C.paspali	4415676	4416416
g1338.t1	Y(0.933)	-	Cytoplasmiceffector	gb|THC99806.1|	246	105	147	232	86	7	0	0	9.74e-43	hypothetical protein EYZ11_000736 [Aspergillus tanneri]	tig00000001_pilon_C.paspali	4415676	4416416
g1338.t1	Y(0.933)	-	Cytoplasmiceffector	gb|THC99806.1|	246	105	161	246	86	9	0	0	7.34e-41	hypothetical protein EYZ11_000736 [Aspergillus tanneri]	tig00000001_pilon_C.paspali	4415676	4416416
g1338.t1	Y(0.933)	-	Cytoplasmiceffector	gb|THC99806.1|	246	105	63	148	86	7	0	0	9.74e-43	hypothetical protein EYZ11_000736 [Aspergillus tanneri]	tig00000001_pilon_C.paspali	4415676	4416416
g1338.t1	Y(0.933)	-	Cytoplasmiceffector	gb|THC99806.1|	246	105	77	162	86	7	0	0	9.74e-43	hypothetical protein EYZ11_000736 [Aspergillus tanneri]	tig00000001_pilon_C.paspali	4415676	4416416
g1338.t1	Y(0.933)	-	Cytoplasmiceffector	gb|THC99806.1|	246	105	91	176	86	7	0	0	9.74e-43	hypothetical protein EYZ11_000736 [Aspergillus tanneri]	tig00000001_pilon_C.paspali	4415676	4416416
g1338.t1	Y(0.933)	-	Cytoplasmiceffector	ref|WP_053484579.1|	246	866	20	240	221	122	1	1	4.41e-25	Cna B-type domain-containing protein [Lysinibacillus sp. FJAT-14745]	tig00000001_pilon_C.paspali	4415676	4416416
g1338.t1	Y(0.933)	-	Cytoplasmiceffector	ref|WP_053484579.1|	246	866	20	244	225	116	1	1	4.95e-30	Cna B-type domain-containing protein [Lysinibacillus sp. FJAT-14745]	tig00000001_pilon_C.paspali	4415676	4416416
g1338.t1	Y(0.933)	-	Cytoplasmiceffector	ref|WP_053484579.1|	246	866	20	244	225	118	1	1	4.01e-29	Cna B-type domain-containing protein [Lysinibacillus sp. FJAT-14745]	tig00000001_pilon_C.paspali	4415676	4416416
g1338.t1	Y(0.933)	-	Cytoplasmiceffector	ref|WP_053484579.1|	246	866	20	244	225	120	1	1	3.25e-28	Cna B-type domain-containing protein [Lysinibacillus sp. FJAT-14745]	tig00000001_pilon_C.paspali	4415676	4416416
g1338.t1	Y(0.933)	-	Cytoplasmiceffector	ref|WP_053484579.1|	246	866	20	245	226	122	1	1	1.62e-27	Cna B-type domain-containing protein [Lysinibacillus sp. FJAT-14745]	tig00000001_pilon_C.paspali	4415676	4416416
g1338.t1	Y(0.933)	-	Cytoplasmiceffector	ref|WP_053484579.1|	246	866	21	243	223	115	1	1	1.93e-29	Cna B-type domain-containing protein [Lysinibacillus sp. FJAT-14745]	tig00000001_pilon_C.paspali	4415676	4416416
g1338.t1	Y(0.933)	-	Cytoplasmiceffector	ref|WP_053484579.1|	246	866	29	244	216	111	1	1	8.07e-28	Cna B-type domain-containing protein [Lysinibacillus sp. FJAT-14745]	tig00000001_pilon_C.paspali	4415676	4416416
g1338.t1	Y(0.933)	-	Cytoplasmiceffector	ref|XP_001585398.1|	246	278	1	246	278	11	20	32	2.52e-109	hypothetical protein SS1G_13637 [Sclerotinia sclerotiorum 1980 UF-70]	tig00000001_pilon_C.paspali	4415676	4416416
g1338.t1	Y(0.933)	-	Cytoplasmiceffector	ref|XP_014009393.1|	246	331	28	221	194	132	1	1	4.36e-26	PREDICTED: histone H1.5-like [Salmo salar]	tig00000001_pilon_C.paspali	4415676	4416416
g1338.t1	Y(0.933)	-	Cytoplasmiceffector	ref|XP_014009393.1|	246	331	36	235	200	139	0	0	6.61e-28	PREDICTED: histone H1.5-like [Salmo salar]	tig00000001_pilon_C.paspali	4415676	4416416
g1338.t1	Y(0.933)	-	Cytoplasmiceffector	ref|XP_014009393.1|	246	331	50	243	194	135	0	0	5.26e-26	PREDICTED: histone H1.5-like [Salmo salar]	tig00000001_pilon_C.paspali	4415676	4416416
g1338.t1	Y(0.933)	-	Cytoplasmiceffector	ref|XP_021457125.1|	246	262	20	240	221	157	1	1	3.67e-25	ribosomally synthesized cyclic peptide ustiloxin B precursosr-like [Oncorhynchus mykiss]	tig00000001_pilon_C.paspali	4415676	4416416
g1338.t1	Y(0.933)	-	Cytoplasmiceffector	ref|XP_021457125.1|	246	262	20	243	224	159	1	1	2.93e-26	ribosomally synthesized cyclic peptide ustiloxin B precursosr-like [Oncorhynchus mykiss]	tig00000001_pilon_C.paspali	4415676	4416416
g1338.t1	Y(0.933)	-	Cytoplasmiceffector	ref|XP_021457125.1|	246	262	20	243	224	159	1	1	2.93e-26	ribosomally synthesized cyclic peptide ustiloxin B precursosr-like [Oncorhynchus mykiss]	tig00000001_pilon_C.paspali	4415676	4416416
g1347.t1	Y(0.955)	Y(0.567)	Cytoplasmic/apoplasticeffector	emb|CCD43771.1|	77	478	1	73	73	21	0	0	6.95e-27	similar to FAD binding domain protein [Botrytis cinerea T4]	tig00000001_pilon_C.paspali	4440045	4440278
g1347.t1	Y(0.955)	Y(0.567)	Cytoplasmic/apoplasticeffector	gb|ESZ90177.1|	77	458	1	73	73	20	0	0	1.58e-26	hypothetical protein SBOR_9430 [Sclerotinia borealis F-4128]	tig00000001_pilon_C.paspali	4440045	4440278
g1347.t1	Y(0.955)	Y(0.567)	Cytoplasmic/apoplasticeffector	gb|PQE08956.1|	77	474	1	72	72	15	0	0	2.21e-30	oxidoreductase FAD-binding protein [Rutstroemia sp. NJR-2017a WRK4]	tig00000001_pilon_C.paspali	4440045	4440278
g1347.t1	Y(0.955)	Y(0.567)	Cytoplasmic/apoplasticeffector	gb|PQE14459.1|	77	446	1	77	77	20	0	0	4.9e-29	oxidoreductase FAD-binding protein [Rutstroemia sp. NJR-2017a BBW]	tig00000001_pilon_C.paspali	4440045	4440278
g1347.t1	Y(0.955)	Y(0.567)	Cytoplasmic/apoplasticeffector	gb|PQE18658.1|	77	482	1	77	77	20	0	0	2.27e-29	oxidoreductase FAD-binding protein [Rutstroemia sp. NJR-2017a BVV2]	tig00000001_pilon_C.paspali	4440045	4440278
g1347.t1	Y(0.955)	Y(0.567)	Cytoplasmic/apoplasticeffector	gb|TEY26538.1|	77	474	1	72	72	22	0	0	3.67e-25	hypothetical protein BOTCAL_1191g00010 [Botryotinia calthae]	tig00000001_pilon_C.paspali	4440045	4440278
g1347.t1	Y(0.955)	Y(0.567)	Cytoplasmic/apoplasticeffector	gb|TGO49557.1|	77	474	1	73	73	21	0	0	1.25e-26	hypothetical protein BOTNAR_0427g00030 [Botryotinia narcissicola]	tig00000001_pilon_C.paspali	4440045	4440278
g1347.t1	Y(0.955)	Y(0.567)	Cytoplasmic/apoplasticeffector	gb|TGO62687.1|	77	474	1	74	74	21	0	0	7.24e-27	hypothetical protein BELL_1108g00020 [Botrytis elliptica]	tig00000001_pilon_C.paspali	4440045	4440278
g1347.t1	Y(0.955)	Y(0.567)	Cytoplasmic/apoplasticeffector	gb|THV45136.1|	77	472	1	73	73	21	0	0	2.81e-26	hypothetical protein BGAL_0526g00070 [Botrytis galanthina]	tig00000001_pilon_C.paspali	4440045	4440278
g1347.t1	Y(0.955)	Y(0.567)	Cytoplasmic/apoplasticeffector	ref|XP_001548762.1|	77	478	1	73	73	21	0	0	7.31e-27	hypothetical protein BCIN_08g01060 [Botrytis cinerea B05.10]	tig00000001_pilon_C.paspali	4440045	4440278
g135.t1	Y(0.905)	-	Cytoplasmiceffector	emb|CCD45084.1|	208	216	1	199	201	26	2	2	6.52e-121	similar to guanylate kinase [Botrytis cinerea T4]	tig00000001_pilon_C.paspali	360721	361502
g135.t1	Y(0.905)	-	Cytoplasmiceffector	gb|EMR91323.1|	208	257	1	199	201	26	2	2	2.16e-120	putative guanylate kinase protein [Botrytis cinerea BcDW1]	tig00000001_pilon_C.paspali	360721	361502
g135.t1	Y(0.905)	-	Cytoplasmiceffector	gb|PQE17292.1|	208	208	1	195	195	7	0	0	7.5e-135	guanylate kinase protein [Rutstroemia sp. NJR-2017a BVV2]	tig00000001_pilon_C.paspali	360721	361502
g135.t1	Y(0.905)	-	Cytoplasmiceffector	gb|PQE23962.1|	208	208	1	208	208	12	0	0	1.87e-141	guanylate kinase protein [Rutstroemia sp. NJR-2017a WRK4]	tig00000001_pilon_C.paspali	360721	361502
g135.t1	Y(0.905)	-	Cytoplasmiceffector	gb|PQE26297.1|	208	208	1	208	208	12	0	0	5.6e-141	guanylate kinase protein [Rutstroemia sp. NJR-2017a BBW]	tig00000001_pilon_C.paspali	360721	361502
g135.t1	Y(0.905)	-	Cytoplasmiceffector	gb|TEY55716.1|	208	257	1	199	201	27	2	2	3.31e-120	hypothetical protein BOTCAL_0230g00090 [Botryotinia calthae]	tig00000001_pilon_C.paspali	360721	361502
g135.t1	Y(0.905)	-	Cytoplasmiceffector	gb|TGO40372.1|	208	257	1	203	205	29	2	2	1.79e-120	hypothetical protein BHYA_0038g00460 [Botrytis hyacinthi]	tig00000001_pilon_C.paspali	360721	361502
g135.t1	Y(0.905)	-	Cytoplasmiceffector	gb|TGO69194.1|	208	257	1	199	201	27	2	2	1e-119	hypothetical protein BOTNAR_0014g00460 [Botryotinia narcissicola]	tig00000001_pilon_C.paspali	360721	361502
g135.t1	Y(0.905)	-	Cytoplasmiceffector	gb|THV54985.1|	208	257	1	199	201	26	2	2	1.73e-120	hypothetical protein BGAL_0016g00280 [Botrytis galanthina]	tig00000001_pilon_C.paspali	360721	361502
g135.t1	Y(0.905)	-	Cytoplasmiceffector	ref|XP_001557747.2|	208	257	1	198	200	26	2	2	1.73e-119	Bcguk1 [Botrytis cinerea B05.10]	tig00000001_pilon_C.paspali	360721	361502
g1361.t1	Y(0.902)	-	Cytoplasmiceffector	ref|WP_052739594.1|	72	985	2	58	57	32	2	3	7.4	non-ribosomal peptide synthetase [Photorhabdus luminescens]	tig00000001_pilon_C.paspali	4478097	4478428
g1361.t1	Y(0.902)	-	Cytoplasmiceffector	ref|WP_105396135.1|	72	1665	2	58	57	31	2	3	9.6	non-ribosomal peptide synthetase [Photorhabdus luminescens]	tig00000001_pilon_C.paspali	4478097	4478428
g137.t1	Y(0.933)	-	Cytoplasmiceffector	gb|ESZ90259.1|	68	67	1	52	53	21	1	1	1.2e-08	hypothetical protein SBOR_9350 [Sclerotinia borealis F-4128]	tig00000001_pilon_C.paspali	364391	364733
g137.t1	Y(0.933)	-	Cytoplasmiceffector	gb|OTA24345.1|	68	63	1	55	55	18	0	0	2.5e-11	hypothetical protein BTJ68_12576 [Hortaea werneckii EXF-2000]	tig00000001_pilon_C.paspali	364391	364733
g137.t1	Y(0.933)	-	Cytoplasmiceffector	gb|RAL65440.1|	68	67	1	52	53	20	1	1	2.48e-09	hypothetical protein DID88_001007 [Monilinia fructigena]	tig00000001_pilon_C.paspali	364391	364733
g137.t1	Y(0.933)	-	Cytoplasmiceffector	gb|RMY39107.1|	68	61	1	48	48	15	0	0	8.2e-10	hypothetical protein D0866_02148 [Hortaea werneckii]	tig00000001_pilon_C.paspali	364391	364733
g137.t1	Y(0.933)	-	Cytoplasmiceffector	gb|RMY49919.1|	68	551	1	68	68	29	1	1	9.74e-10	hypothetical protein D0865_07207, partial [Hortaea werneckii]	tig00000001_pilon_C.paspali	364391	364733
g137.t1	Y(0.933)	-	Cytoplasmiceffector	gb|RMY52381.1|	68	63	1	55	55	18	0	0	1.82e-11	hypothetical protein D0864_14269 [Hortaea werneckii]	tig00000001_pilon_C.paspali	364391	364733
g137.t1	Y(0.933)	-	Cytoplasmiceffector	gb|RMZ30201.1|	68	61	1	48	48	16	0	0	8.27e-09	hypothetical protein D0859_05689 [Hortaea werneckii]	tig00000001_pilon_C.paspali	364391	364733
g137.t1	Y(0.933)	-	Cytoplasmiceffector	gb|TEY55717.1|	68	67	1	54	55	21	1	1	7.12e-10	hypothetical protein BOTCAL_0230g00100 [Botryotinia calthae]	tig00000001_pilon_C.paspali	364391	364733
g137.t1	Y(0.933)	-	Cytoplasmiceffector	gb|TGO40373.1|	68	67	1	54	55	22	1	1	1.14e-09	hypothetical protein BHYA_0038g00470 [Botrytis hyacinthi]	tig00000001_pilon_C.paspali	364391	364733
g137.t1	Y(0.933)	-	Cytoplasmiceffector	ref|XP_001557745.1|	68	67	1	54	55	21	1	1	6.25e-10	hypothetical protein BCIN_04g05900 [Botrytis cinerea B05.10]	tig00000001_pilon_C.paspali	364391	364733
g1381.t1	Y(0.926)	-	Cytoplasmiceffector	emb|CZR69302.1|	136	499	9	135	127	52	0	0	3.32e-43	related to putative tartrate transporter [Phialocephala subalpina]	tig00000001_pilon_C.paspali	4539202	4539612
g1381.t1	Y(0.926)	-	Cytoplasmiceffector	gb|KIM94262.1|	136	528	12	134	123	51	0	0	4.66e-42	hypothetical protein OIDMADRAFT_184364 [Oidiodendron maius Zn]	tig00000001_pilon_C.paspali	4539202	4539612
g1381.t1	Y(0.926)	-	Cytoplasmiceffector	gb|PMD42708.1|	136	457	45	134	90	26	0	0	2.86e-39	putative MFS transporter, partial [Hyaloscypha variabilis F]	tig00000001_pilon_C.paspali	4539202	4539612
g1381.t1	Y(0.926)	-	Cytoplasmiceffector	gb|PQE09791.1|	136	481	1	127	130	29	1	3	7.3e-58	hypothetical protein CJF30_00010789 [Rutstroemia sp. NJR-2017a BBW]	tig00000001_pilon_C.paspali	4539202	4539612
g1381.t1	Y(0.926)	-	Cytoplasmiceffector	gb|PQE19854.1|	136	943	1	134	137	24	1	3	1.08e-66	hypothetical protein CJF31_00006357 [Rutstroemia sp. NJR-2017a BVV2]	tig00000001_pilon_C.paspali	4539202	4539612
g1381.t1	Y(0.926)	-	Cytoplasmiceffector	gb|PQE27301.1|	136	509	1	134	137	24	1	3	6.79e-69	hypothetical protein CJF32_00000265 [Rutstroemia sp. NJR-2017a WRK4]	tig00000001_pilon_C.paspali	4539202	4539612
g1381.t1	Y(0.926)	-	Cytoplasmiceffector	gb|PVH82451.1|	136	483	23	134	121	34	2	10	3.32e-47	MFS general substrate transporter [Cadophora sp. DSE1049]	tig00000001_pilon_C.paspali	4539202	4539612
g1381.t1	Y(0.926)	-	Cytoplasmiceffector	gb|RDW59959.1|	136	501	33	134	102	38	0	0	1.47e-38	hypothetical protein BP6252_13046 [Coleophoma cylindrospora]	tig00000001_pilon_C.paspali	4539202	4539612
g1381.t1	Y(0.926)	-	Cytoplasmiceffector	ref|XP_018073727.1|	136	484	39	134	96	35	0	0	6.62e-39	MFS transporter [Phialocephala scopiformis]	tig00000001_pilon_C.paspali	4539202	4539612
g1381.t1	Y(0.926)	-	Cytoplasmiceffector	ref|XP_024736288.1|	136	501	22	134	113	39	1	2	7.88e-41	MFS general substrate transporter [Meliniomyces bicolor E]	tig00000001_pilon_C.paspali	4539202	4539612
g1399.t1	Y(0.902)	-	Cytoplasmiceffector	gb|PMD24877.1|	325	325	1	325	326	63	2	3	0	DUF1000-domain-containing protein [Pezoloma ericae]	tig00000001_pilon_C.paspali	4584330	4585546
g1399.t1	Y(0.902)	-	Cytoplasmiceffector	gb|PMD39844.1|	325	325	1	325	326	64	2	3	0	DUF1000-domain-containing protein [Hyaloscypha variabilis F]	tig00000001_pilon_C.paspali	4584330	4585546
g1399.t1	Y(0.902)	-	Cytoplasmiceffector	gb|PQE09776.1|	325	325	1	325	325	16	0	0	0	thioredoxin protein [Rutstroemia sp. NJR-2017a BBW]	tig00000001_pilon_C.paspali	4584330	4585546
g1399.t1	Y(0.902)	-	Cytoplasmiceffector	gb|PQE19855.1|	325	333	1	325	325	16	0	0	0	thioredoxin protein [Rutstroemia sp. NJR-2017a BVV2]	tig00000001_pilon_C.paspali	4584330	4585546
g1399.t1	Y(0.902)	-	Cytoplasmiceffector	gb|PQE27302.1|	325	325	1	325	325	16	0	0	0	thioredoxin protein [Rutstroemia sp. NJR-2017a WRK4]	tig00000001_pilon_C.paspali	4584330	4585546
g1399.t1	Y(0.902)	-	Cytoplasmiceffector	gb|PVH88421.1|	325	329	1	325	327	68	2	2	0	DUF1000-domain-containing protein [Cadophora sp. DSE1049]	tig00000001_pilon_C.paspali	4584330	4585546
g1399.t1	Y(0.902)	-	Cytoplasmiceffector	gb|RDW64772.1|	325	328	1	325	326	64	1	1	0	thioredoxin-1 [Coleophoma cylindrospora]	tig00000001_pilon_C.paspali	4584330	4585546
g1399.t1	Y(0.902)	-	Cytoplasmiceffector	ref|XP_007290439.1|	325	323	1	322	323	71	2	2	0	thioredoxin [Marssonina brunnea f. sp. 'multigermtubi' MB_m1]	tig00000001_pilon_C.paspali	4584330	4585546
g1399.t1	Y(0.902)	-	Cytoplasmiceffector	ref|XP_024725307.1|	325	326	1	325	327	74	5	5	4.26e-180	hypothetical protein M430DRAFT_15043 [Amorphotheca resinae ATCC 22711]	tig00000001_pilon_C.paspali	4584330	4585546
g1399.t1	Y(0.902)	-	Cytoplasmiceffector	ref|XP_024728961.1|	325	325	1	325	326	64	2	3	0	DUF1000-domain-containing protein [Meliniomyces bicolor E]	tig00000001_pilon_C.paspali	4584330	4585546
g1525.t1	Y(0.921)	-	Cytoplasmiceffector	gb|ESZ94036.1|	134	567	1	131	142	76	4	12	9.23e-22	hypothetical protein SBOR_5562 [Sclerotinia borealis F-4128]	tig00000001_pilon_C.paspali	4931475	4931879
g1525.t1	Y(0.921)	-	Cytoplasmiceffector	gb|KFY10986.1|	134	416	1	131	167	70	3	36	4.01e-20	hypothetical protein V491_07380 [Pseudogymnoascus sp. VKM F-3775]	tig00000001_pilon_C.paspali	4931475	4931879
g1525.t1	Y(0.921)	-	Cytoplasmiceffector	gb|KFY10986.1|	134	416	61	116	58	33	1	2	0.053	hypothetical protein V491_07380 [Pseudogymnoascus sp. VKM F-3775]	tig00000001_pilon_C.paspali	4931475	4931879
g1525.t1	Y(0.921)	-	Cytoplasmiceffector	gb|KFZ01727.1|	134	429	1	131	167	66	3	36	5.53e-23	hypothetical protein V501_09832 [Pseudogymnoascus sp. VKM F-4519 (FW-2642)]	tig00000001_pilon_C.paspali	4931475	4931879
g1525.t1	Y(0.921)	-	Cytoplasmiceffector	gb|KFZ01727.1|	134	429	61	123	65	38	2	2	0.004	hypothetical protein V501_09832 [Pseudogymnoascus sp. VKM F-4519 (FW-2642)]	tig00000001_pilon_C.paspali	4931475	4931879
g1525.t1	Y(0.921)	-	Cytoplasmiceffector	gb|OBT38933.1|	134	603	2	131	141	65	2	11	8.97e-31	hypothetical protein VE00_10561 [Pseudogymnoascus sp. WSF 3629]	tig00000001_pilon_C.paspali	4931475	4931879
g1525.t1	Y(0.921)	-	Cytoplasmiceffector	gb|PVH70190.1|	134	231	1	133	144	72	2	11	6.77e-29	hypothetical protein DL98DRAFT_521748 [Cadophora sp. DSE1049]	tig00000001_pilon_C.paspali	4931475	4931879
g1525.t1	Y(0.921)	-	Cytoplasmiceffector	gb|PVH70190.1|	134	231	47	105	59	31	1	4	0.024	hypothetical protein DL98DRAFT_521748 [Cadophora sp. DSE1049]	tig00000001_pilon_C.paspali	4931475	4931879
g1525.t1	Y(0.921)	-	Cytoplasmiceffector	gb|RDL30223.1|	134	622	1	131	143	69	4	13	1.29e-23	hypothetical protein BP5553_10501 [Phialophora cf. hyalina BP 5553]	tig00000001_pilon_C.paspali	4931475	4931879
g1525.t1	Y(0.921)	-	Cytoplasmiceffector	gb|RDL30223.1|	134	622	61	104	44	28	0	0	7.1	hypothetical protein BP5553_10501 [Phialophora cf. hyalina BP 5553]	tig00000001_pilon_C.paspali	4931475	4931879
g1525.t1	Y(0.921)	-	Cytoplasmiceffector	gb|TEY73426.1|	134	454	1	126	137	69	4	13	9.46e-21	hypothetical protein BOTCAL_0078g00190 [Botryotinia calthae]	tig00000001_pilon_C.paspali	4931475	4931879
g1525.t1	Y(0.921)	-	Cytoplasmiceffector	gb|TEY73426.1|	134	454	61	104	44	27	0	0	0.22	hypothetical protein BOTCAL_0078g00190 [Botryotinia calthae]	tig00000001_pilon_C.paspali	4931475	4931879
g1525.t1	Y(0.921)	-	Cytoplasmiceffector	gb|TGO07447.1|	134	540	1	131	142	74	3	12	7.48e-19	hypothetical protein BTUL_0275g00090 [Botrytis tulipae]	tig00000001_pilon_C.paspali	4931475	4931879
g1525.t1	Y(0.921)	-	Cytoplasmiceffector	gb|TGO31761.1|	134	486	1	131	142	72	3	12	5.58e-21	hypothetical protein BHYA_0417g00080 [Botrytis hyacinthi]	tig00000001_pilon_C.paspali	4931475	4931879
g1525.t1	Y(0.921)	-	Cytoplasmiceffector	ref|XP_024328427.1|	134	416	1	131	166	65	3	35	2.52e-23	hypothetical protein VC83_00659 [Pseudogymnoascus destructans]	tig00000001_pilon_C.paspali	4931475	4931879
g1525.t1	Y(0.921)	-	Cytoplasmiceffector	ref|XP_024328427.1|	134	416	61	123	65	38	2	2	0.004	hypothetical protein VC83_00659 [Pseudogymnoascus destructans]	tig00000001_pilon_C.paspali	4931475	4931879
g1559.t1	Y(0.903)	-	Cytoplasmiceffector	emb|CVL00281.1|	157	152	11	152	142	60	0	0	1.4e-57	uncharacterized protein FMAN_09785 [Fusarium mangiferae]	tig00000001_pilon_C.paspali	5011240	5011713
g1559.t1	Y(0.903)	-	Cytoplasmiceffector	gb|OJJ32016.1|	157	168	1	152	152	66	1	1	1.75e-56	hypothetical protein ASPWEDRAFT_646305 [Aspergillus wentii DTO 134E9]	tig00000001_pilon_C.paspali	5011240	5011713
g1559.t1	Y(0.903)	-	Cytoplasmiceffector	gb|RSL52988.1|	157	157	1	153	153	63	1	2	2.45e-58	hypothetical protein CEP54_010606 [Fusarium sp. AF-8]	tig00000001_pilon_C.paspali	5011240	5011713
g1559.t1	Y(0.903)	-	Cytoplasmiceffector	gb|TGO66368.1|	157	162	8	152	147	59	2	3	1.15e-57	hypothetical protein BOTNAR_0062g00010 [Botryotinia narcissicola]	tig00000001_pilon_C.paspali	5011240	5011713
g1559.t1	Y(0.903)	-	Cytoplasmiceffector	gb|TGO80663.1|	157	169	2	154	153	60	1	1	9.55e-63	hypothetical protein BELL_0003g00300 [Botrytis elliptica]	tig00000001_pilon_C.paspali	5011240	5011713
g1559.t1	Y(0.903)	-	Cytoplasmiceffector	ref|XP_001270215.1|	157	164	1	152	152	64	1	1	1.09e-59	conserved hypothetical protein [Aspergillus clavatus NRRL 1]	tig00000001_pilon_C.paspali	5011240	5011713
g1559.t1	Y(0.903)	-	Cytoplasmiceffector	ref|XP_002846439.1|	157	163	1	155	155	68	1	1	2.8e-57	conserved hypothetical protein [Microsporum canis CBS 113480]	tig00000001_pilon_C.paspali	5011240	5011713
g1559.t1	Y(0.903)	-	Cytoplasmiceffector	ref|XP_003041827.1|	157	157	1	153	153	64	1	2	2.33e-57	hypothetical protein NECHADRAFT_53170 [[Nectria] haematococca mpVI 77-13-4]	tig00000001_pilon_C.paspali	5011240	5011713
g1559.t1	Y(0.903)	-	Cytoplasmiceffector	ref|XP_024551183.1|	157	165	2	153	152	68	1	1	1.87e-56	hypothetical protein BCIN_10g00500 [Botrytis cinerea B05.10]	tig00000001_pilon_C.paspali	5011240	5011713
g1559.t1	Y(0.903)	-	Cytoplasmiceffector	ref|XP_028481224.1|	157	162	1	153	153	60	1	1	4.16e-60	zinc-binding domain-containing protein [Byssochlamys spectabilis]	tig00000001_pilon_C.paspali	5011240	5011713
g1655.t1	Y(0.901)	-	Cytoplasmiceffector	gb|KXS98201.1|	84	241	13	69	57	34	1	3	8.8	hypothetical protein AC578_285 [Pseudocercospora eumusae]	tig00000001_pilon_C.paspali	5310261	5310814
g166.t1	Y(0.939)	-	Cytoplasmiceffector	emb|CZS88845.1|	208	208	1	208	208	18	0	0	1.52e-140	probable Ras-related protein Rab-6A [Rhynchosporium commune]	tig00000001_pilon_C.paspali	439426	440316
g166.t1	Y(0.939)	-	Cytoplasmiceffector	gb|APA12916.1|	208	207	1	208	208	13	1	1	1.25e-142	hypothetical protein sscle_10g076860 [Sclerotinia sclerotiorum 1980 UF-70]	tig00000001_pilon_C.paspali	439426	440316
g166.t1	Y(0.939)	-	Cytoplasmiceffector	gb|ESZ95880.1|	208	207	1	208	208	13	1	1	3.8e-142	putative RAS small monomeric GTPase Rab6 [Sclerotinia borealis F-4128]	tig00000001_pilon_C.paspali	439426	440316
g166.t1	Y(0.939)	-	Cytoplasmiceffector	gb|KUI55127.1|	208	208	1	208	208	20	0	0	2.75e-140	Ras-related protein Rab-6B [Valsa mali var. pyri]	tig00000001_pilon_C.paspali	439426	440316
g166.t1	Y(0.939)	-	Cytoplasmiceffector	gb|POS77433.1|	208	208	1	208	208	20	0	0	2.36e-140	Ras-like protein Rab-6B [Diaporthe helianthi]	tig00000001_pilon_C.paspali	439426	440316
g166.t1	Y(0.939)	-	Cytoplasmiceffector	gb|ROW08030.1|	208	208	1	208	208	20	0	0	1.36e-140	hypothetical protein VPNG_06087 [Cytospora leucostoma]	tig00000001_pilon_C.paspali	439426	440316
g166.t1	Y(0.939)	-	Cytoplasmiceffector	gb|TGO15766.1|	208	207	1	208	208	13	1	1	4.67e-143	hypothetical protein BTUL_0036g00580 [Botrytis tulipae]	tig00000001_pilon_C.paspali	439426	440316
g166.t1	Y(0.939)	-	Cytoplasmiceffector	ref|XP_007288632.1|	208	208	1	208	208	18	0	0	2.49e-140	Ras family protein [Marssonina brunnea f. sp. 'multigermtubi' MB_m1]	tig00000001_pilon_C.paspali	439426	440316
g166.t1	Y(0.939)	-	Cytoplasmiceffector	ref|XP_018070591.1|	208	208	1	208	208	17	0	0	5.36e-141	ras-domain-containing protein [Phialocephala scopiformis]	tig00000001_pilon_C.paspali	439426	440316
g166.t1	Y(0.939)	-	Cytoplasmiceffector	ref|XP_024552210.1|	208	207	1	208	208	13	1	1	1.92e-142	hypothetical protein BCIN_12g03760 [Botrytis cinerea B05.10]	tig00000001_pilon_C.paspali	439426	440316
g1748.t1	Y(0.911)	-	Cytoplasmiceffector	gb|PQE20776.1|	203	203	1	201	201	27	0	0	9.04e-112	hypothetical protein CJF30_00002080 [Rutstroemia sp. NJR-2017a BBW]	tig00000001_pilon_C.paspali	5575992	5576665
g1748.t1	Y(0.911)	-	Cytoplasmiceffector	gb|PQE28007.1|	203	203	1	201	201	29	0	0	9.33e-110	hypothetical protein CJF32_00005752 [Rutstroemia sp. NJR-2017a WRK4]	tig00000001_pilon_C.paspali	5575992	5576665
g1748.t1	Y(0.911)	-	Cytoplasmiceffector	gb|TEY50425.1|	203	201	1	200	200	83	0	0	5.29e-80	hypothetical protein BOTCAL_0276g00050 [Botryotinia calthae]	tig00000001_pilon_C.paspali	5575992	5576665
g1748.t1	Y(0.911)	-	Cytoplasmiceffector	gb|TGO06987.1|	203	201	1	200	200	81	0	0	1.22e-80	hypothetical protein BTUL_0363g00060 [Botrytis tulipae]	tig00000001_pilon_C.paspali	5575992	5576665
g1748.t1	Y(0.911)	-	Cytoplasmiceffector	gb|TGO28974.1|	203	201	1	200	200	80	0	0	1.54e-82	hypothetical protein BPAE_0020g00190 [Botrytis paeoniae]	tig00000001_pilon_C.paspali	5575992	5576665
g1748.t1	Y(0.911)	-	Cytoplasmiceffector	gb|TGO35573.1|	203	201	1	200	200	81	0	0	1.5e-82	hypothetical protein BHYA_0153g00070 [Botrytis hyacinthi]	tig00000001_pilon_C.paspali	5575992	5576665
g1748.t1	Y(0.911)	-	Cytoplasmiceffector	gb|TGO54513.1|	203	201	1	200	200	82	0	0	4.18e-83	hypothetical protein BCON_0106g00300 [Botryotinia convoluta]	tig00000001_pilon_C.paspali	5575992	5576665
g1748.t1	Y(0.911)	-	Cytoplasmiceffector	gb|TGO78217.1|	203	201	1	200	200	79	0	0	6.23e-82	hypothetical protein BELL_0074g00070 [Botrytis elliptica]	tig00000001_pilon_C.paspali	5575992	5576665
g1748.t1	Y(0.911)	-	Cytoplasmiceffector	gb|TGO89169.1|	203	201	1	200	200	82	0	0	7.55e-81	hypothetical protein BPOR_0122g00170 [Botrytis porri]	tig00000001_pilon_C.paspali	5575992	5576665
g1748.t1	Y(0.911)	-	Cytoplasmiceffector	gb|THV45242.1|	203	201	1	200	200	81	0	0	5.53e-80	hypothetical protein BGAL_0512g00060 [Botrytis galanthina]	tig00000001_pilon_C.paspali	5575992	5576665
g1763.t1	Y(0.92)	-	Cytoplasmiceffector	emb|CZR55130.1|	75	75	1	75	75	12	0	0	2.1e-40	probable DNA-directed RNA polymerase II chain RPB10 [Phialocephala subalpina]	tig00000001_pilon_C.paspali	5612835	5613262
g1763.t1	Y(0.92)	-	Cytoplasmiceffector	gb|APA09899.1|	75	76	1	75	75	7	0	0	5.27e-45	hypothetical protein sscle_05g046690 [Sclerotinia sclerotiorum 1980 UF-70]	tig00000001_pilon_C.paspali	5612835	5613262
g1763.t1	Y(0.92)	-	Cytoplasmiceffector	gb|EPQ63395.1|	75	75	1	75	75	12	0	0	2.92e-40	RNA polymerase subunit ABC10-beta [Blumeria graminis f. sp. tritici 96224]	tig00000001_pilon_C.paspali	5612835	5613262
g1763.t1	Y(0.92)	-	Cytoplasmiceffector	gb|ESZ98770.1|	75	76	1	75	75	9	0	0	5.59e-44	DNA-directed RNA polymerase N/8 kDa subunit [Sclerotinia borealis F-4128]	tig00000001_pilon_C.paspali	5612835	5613262
g1763.t1	Y(0.92)	-	Cytoplasmiceffector	gb|KIM98094.1|	75	75	1	74	74	12	0	0	1.24e-40	hypothetical protein OIDMADRAFT_20390 [Oidiodendron maius Zn]	tig00000001_pilon_C.paspali	5612835	5613262
g1763.t1	Y(0.92)	-	Cytoplasmiceffector	gb|PMD12738.1|	75	75	1	75	75	13	0	0	2.47e-40	putative DNA-directed RNA polymerases I, II, and III subunit RPABC5 [Pezoloma ericae]	tig00000001_pilon_C.paspali	5612835	5613262
g1763.t1	Y(0.92)	-	Cytoplasmiceffector	gb|PMD38436.1|	75	75	1	75	75	13	0	0	1.74e-40	putative DNA-directed RNA polymerases I, II, and III subunit RPABC5 [Hyaloscypha variabilis F]	tig00000001_pilon_C.paspali	5612835	5613262
g1763.t1	Y(0.92)	-	Cytoplasmiceffector	gb|RDL33081.1|	75	75	1	75	75	12	0	0	7.31e-41	Uncharacterized protein BP5553_08520 [Phialophora cf. hyalina BP 5553]	tig00000001_pilon_C.paspali	5612835	5613262
g1763.t1	Y(0.92)	-	Cytoplasmiceffector	ref|XP_001560085.1|	75	76	1	75	75	7	0	0	7.41e-45	Bcrpb10 [Botrytis cinerea B05.10]	tig00000001_pilon_C.paspali	5612835	5613262
g1763.t1	Y(0.92)	-	Cytoplasmiceffector	ref|XP_024738579.1|	75	75	1	75	75	12	0	0	3.07e-41	putative DNA-directed RNA polymerases I, II, and III subunit RPABC5 [Meliniomyces bicolor E]	tig00000001_pilon_C.paspali	5612835	5613262
g1775.t1	Y(0.916)	-	Cytoplasmiceffector	gb|PVH69337.1|	69	148	1	59	59	18	0	0	1.57e-12	ribonuclease III [Cadophora sp. DSE1049]	tig00000001_pilon_C.paspali	5648314	5648523
g1775.t1	Y(0.916)	-	Cytoplasmiceffector	gb|PVH91490.1|	69	148	1	59	59	16	0	0	1.95e-20	ribonuclease III [Periconia macrospinosa]	tig00000001_pilon_C.paspali	5648314	5648523
g1775.t1	Y(0.916)	-	Cytoplasmiceffector	gb|RMZ69975.1|	69	147	1	59	59	18	0	0	1.48e-11	rnase iii [Pyrenophora seminiperda CCB06]	tig00000001_pilon_C.paspali	5648314	5648523
g1775.t1	Y(0.916)	-	Cytoplasmiceffector	ref|XP_007693742.1|	69	147	1	59	59	14	0	0	8.46e-22	hypothetical protein COCMIDRAFT_31177 [Bipolaris oryzae ATCC 44560]	tig00000001_pilon_C.paspali	5648314	5648523
g1775.t1	Y(0.916)	-	Cytoplasmiceffector	ref|XP_007694036.1|	69	147	1	59	59	18	0	0	1.18e-12	hypothetical protein COCMIDRAFT_10509 [Bipolaris oryzae ATCC 44560]	tig00000001_pilon_C.paspali	5648314	5648523
g1775.t1	Y(0.916)	-	Cytoplasmiceffector	ref|XP_007696548.1|	69	148	1	59	59	21	0	0	1.61e-17	hypothetical protein COCSADRAFT_34131 [Bipolaris sorokiniana ND90Pr]	tig00000001_pilon_C.paspali	5648314	5648523
g1775.t1	Y(0.916)	-	Cytoplasmiceffector	ref|XP_008030377.1|	69	147	1	59	59	15	0	0	2.14e-15	hypothetical protein SETTUDRAFT_165543 [Exserohilum turcica Et28A]	tig00000001_pilon_C.paspali	5648314	5648523
g1775.t1	Y(0.916)	-	Cytoplasmiceffector	ref|XP_014073001.1|	69	148	1	59	59	16	0	0	2.5e-13	hypothetical protein COCC4DRAFT_208854 [Bipolaris maydis ATCC 48331]	tig00000001_pilon_C.paspali	5648314	5648523
g1775.t1	Y(0.916)	-	Cytoplasmiceffector	ref|XP_014075011.1|	69	147	1	59	59	17	0	0	1.22e-13	hypothetical protein COCC4DRAFT_148955 [Bipolaris maydis ATCC 48331]	tig00000001_pilon_C.paspali	5648314	5648523
g1775.t1	Y(0.916)	-	Cytoplasmiceffector	ref|XP_014550627.1|	69	97	1	57	57	20	0	0	1.91e-16	hypothetical protein COCVIDRAFT_42915 [Bipolaris victoriae FI3]	tig00000001_pilon_C.paspali	5648314	5648523
g1863.t1	Y(0.957)	-	Cytoplasmiceffector	gb|MAI47704.1|	82	476	13	60	48	26	1	4	6.7	NAD-dependent succinate-semialdehyde dehydrogenase [Filomicrobium sp.]	tig00000001_pilon_C.paspali	5878780	5879028
g1863.t1	Y(0.957)	-	Cytoplasmiceffector	ref|WP_057957634.1|	82	655	4	64	67	40	1	6	6.6	HAMP domain-containing protein [Bacillus glycinifermentans]	tig00000001_pilon_C.paspali	5878780	5879028
g1863.t1	Y(0.957)	-	Cytoplasmiceffector	ref|WP_085785146.1|	82	476	13	63	51	29	1	4	4.8	NAD-dependent succinate-semialdehyde dehydrogenase [Ketogulonicigenium robustum]	tig00000001_pilon_C.paspali	5878780	5879028
g1863.t1	Y(0.957)	-	Cytoplasmiceffector	ref|WP_096891837.1|	82	660	4	64	67	40	1	6	6.4	HAMP domain-containing protein [Bacillus glycinifermentans]	tig00000001_pilon_C.paspali	5878780	5879028
g1915.t1	Y(0.904)	-	Cytoplasmiceffector	gb|ELQ63364.1|	103	547	10	60	51	27	1	5	7	cwfJ domain-containing protein [Pyricularia oryzae P131]	tig00000001_pilon_C.paspali	6011775	6012250
g1915.t1	Y(0.904)	-	Cytoplasmiceffector	gb|MBM98038.1|	103	473	23	85	64	43	2	2	4.1	replicative DNA helicase [Planctomycetaceae bacterium]	tig00000001_pilon_C.paspali	6011775	6012250
g1915.t1	Y(0.904)	-	Cytoplasmiceffector	gb|QBZ59779.1|	103	543	10	60	51	27	1	5	7	hypothetical protein PoMZ_04743 [Pyricularia oryzae]	tig00000001_pilon_C.paspali	6011775	6012250
g1915.t1	Y(0.904)	-	Cytoplasmiceffector	gb|RNC55945.1|	103	178	42	89	48	32	0	0	2.4	hypothetical protein TcCL_ESM06553 [Trypanosoma cruzi]	tig00000001_pilon_C.paspali	6011775	6012250
g1915.t1	Y(0.904)	-	Cytoplasmiceffector	ref|WP_073644755.1|	103	388	4	58	65	33	1	10	3.5	hypothetical protein [Nostoc calcicola]	tig00000001_pilon_C.paspali	6011775	6012250
g1915.t1	Y(0.904)	-	Cytoplasmiceffector	ref|XP_003712955.1|	103	543	10	60	51	27	1	5	7.1	cwfJ domain-containing protein [Pyricularia oryzae 70-15]	tig00000001_pilon_C.paspali	6011775	6012250
g1915.t1	Y(0.904)	-	Cytoplasmiceffector	ref|XP_806046.1|	103	205	42	89	48	32	0	0	3.4	hypothetical protein [Trypanosoma cruzi strain CL Brener]	tig00000001_pilon_C.paspali	6011775	6012250
g1925.t1	Y(0.935)	-	Cytoplasmiceffector	gb|KIA78480.1|	70	510	26	67	42	24	0	0	7.8	hypothetical protein DB43_DY00310 [Parachlamydia acanthamoebae]	tig00000001_pilon_C.paspali	6026005	6026217
g1925.t1	Y(0.935)	-	Cytoplasmiceffector	ref|WP_006341867.1|	70	487	26	67	42	24	0	0	7.1	ATP-grasp domain-containing protein [Parachlamydia acanthamoebae]	tig00000001_pilon_C.paspali	6026005	6026217
g1925.t1	Y(0.935)	-	Cytoplasmiceffector	ref|WP_013924600.1|	70	487	26	67	42	24	0	0	6.9	ATP-grasp domain-containing protein [Parachlamydia acanthamoebae]	tig00000001_pilon_C.paspali	6026005	6026217
g1925.t1	Y(0.935)	-	Cytoplasmiceffector	ref|WP_042217455.1|	70	805	17	70	54	30	1	5	9.7	hypothetical protein [Paenibacillus borealis]	tig00000001_pilon_C.paspali	6026005	6026217
g1925.t1	Y(0.935)	-	Cytoplasmiceffector	ref|XP_011079508.1|	70	719	16	54	39	22	0	0	7.1	probable boron transporter 2 [Sesamum indicum]	tig00000001_pilon_C.paspali	6026005	6026217
g1955.t1	Y(0.923)	-	Cytoplasmiceffector	gb|APA11219.1|	137	137	1	137	137	14	0	0	4.95e-89	hypothetical protein sscle_07g059890 [Sclerotinia sclerotiorum 1980 UF-70]	tig00000001_pilon_C.paspali	6092719	6093241
g1955.t1	Y(0.923)	-	Cytoplasmiceffector	gb|PQE05558.1|	137	137	1	137	137	7	0	0	1.86e-94	mitochondrial ribosomal L43 protein [Rutstroemia sp. NJR-2017a BBW]	tig00000001_pilon_C.paspali	6092719	6093241
g1955.t1	Y(0.923)	-	Cytoplasmiceffector	gb|RAL68642.1|	137	137	1	137	137	14	0	0	8.74e-90	hypothetical protein DID88_007353 [Monilinia fructigena]	tig00000001_pilon_C.paspali	6092719	6093241
g1955.t1	Y(0.923)	-	Cytoplasmiceffector	gb|TAQ84619.1|	137	137	1	137	137	24	0	0	1.2e-82	hypothetical protein B7494_g7050 [Chlorociboria aeruginascens]	tig00000001_pilon_C.paspali	6092719	6093241
g1955.t1	Y(0.923)	-	Cytoplasmiceffector	gb|TGO07751.1|	137	137	1	137	137	20	0	0	1.86e-85	hypothetical protein BTUL_0249g00120 [Botrytis tulipae]	tig00000001_pilon_C.paspali	6092719	6093241
g1955.t1	Y(0.923)	-	Cytoplasmiceffector	gb|TGO20644.1|	137	137	1	137	137	19	0	0	6.77e-86	hypothetical protein BPAE_0278g00080 [Botrytis paeoniae]	tig00000001_pilon_C.paspali	6092719	6093241
g1955.t1	Y(0.923)	-	Cytoplasmiceffector	gb|TGO52111.1|	137	137	1	137	137	22	0	0	2.73e-84	hypothetical protein BOTNAR_0334g00060 [Botryotinia narcissicola]	tig00000001_pilon_C.paspali	6092719	6093241
g1955.t1	Y(0.923)	-	Cytoplasmiceffector	gb|TGO52122.1|	137	137	1	137	137	20	0	0	1.9e-85	hypothetical protein BCON_0147g00090 [Botryotinia convoluta]	tig00000001_pilon_C.paspali	6092719	6093241
g1955.t1	Y(0.923)	-	Cytoplasmiceffector	gb|TGO72426.1|	137	137	1	137	137	20	0	0	2.19e-85	hypothetical protein BELL_0456g00070 [Botrytis elliptica]	tig00000001_pilon_C.paspali	6092719	6093241
g1955.t1	Y(0.923)	-	Cytoplasmiceffector	ref|XP_024550500.1|	137	137	1	137	137	17	0	0	3.5e-87	Bcmrpl51 [Botrytis cinerea B05.10]	tig00000001_pilon_C.paspali	6092719	6093241
g1967.t1	Y(0.911)	-	Cytoplasmiceffector	gb|OKT35855.1|	178	134	64	137	74	48	1	2	1	hypothetical protein ACN63_24980, partial [Escherichia coli]	tig00000001_pilon_C.paspali	6115856	6116572
g1967.t1	Y(0.911)	-	Cytoplasmiceffector	gb|PDN89106.1|	178	257	64	137	74	48	1	2	0.99	hypothetical protein CJU66_26520, partial [Escherichia coli]	tig00000001_pilon_C.paspali	6115856	6116572
g1967.t1	Y(0.911)	-	Cytoplasmiceffector	gb|PJW72624.1|	178	496	64	137	74	48	1	2	0.68	hypothetical protein CWD58_25015, partial [Escherichia coli]	tig00000001_pilon_C.paspali	6115856	6116572
g1967.t1	Y(0.911)	-	Cytoplasmiceffector	gb|TEW08750.1|	178	162	64	137	74	48	1	2	1.2	hypothetical protein E2122_23145, partial [Escherichia coli]	tig00000001_pilon_C.paspali	6115856	6116572
g1967.t1	Y(0.911)	-	Cytoplasmiceffector	ref|WP_001672789.1|	178	1204	43	137	98	61	3	6	1.1	RHS repeat protein, partial [Escherichia coli]	tig00000001_pilon_C.paspali	6115856	6116572
g1967.t1	Y(0.911)	-	Cytoplasmiceffector	ref|WP_085022064.1|	178	1203	43	137	98	61	3	6	0.96	RHS repeat protein, partial [Escherichia coli]	tig00000001_pilon_C.paspali	6115856	6116572
g1967.t1	Y(0.911)	-	Cytoplasmiceffector	ref|WP_112031151.1|	178	1407	55	137	83	55	1	2	1.1	RHS repeat protein [Escherichia coli]	tig00000001_pilon_C.paspali	6115856	6116572
g1967.t1	Y(0.911)	-	Cytoplasmiceffector	ref|WP_134234508.1|	178	524	64	137	74	48	1	2	1.3	RHS repeat protein, partial [Escherichia coli]	tig00000001_pilon_C.paspali	6115856	6116572
g1967.t1	Y(0.911)	-	Cytoplasmiceffector	ref|WP_135563761.1|	178	700	43	137	98	61	3	6	1.1	RHS repeat protein, partial [Escherichia coli]	tig00000001_pilon_C.paspali	6115856	6116572
g1967.t1	Y(0.911)	-	Cytoplasmiceffector	ref|WP_135948873.1|	178	1203	43	137	98	61	3	6	0.99	RHS repeat protein, partial [Escherichia coli]	tig00000001_pilon_C.paspali	6115856	6116572
g2003.t1	Y(0.903)	-	Cytoplasmiceffector	gb|APA11236.1|	188	226	1	188	188	21	0	0	3.92e-118	hypothetical protein sscle_07g060060 [Sclerotinia sclerotiorum 1980 UF-70]	tig00000001_pilon_C.paspali	6210768	6211543
g2003.t1	Y(0.903)	-	Cytoplasmiceffector	gb|ESZ95168.1|	188	189	1	188	188	26	0	0	1.84e-121	NADH-ubiquinone oxidoreductase 21 kDa subunit [Sclerotinia borealis F-4128]	tig00000001_pilon_C.paspali	6210768	6211543
g2003.t1	Y(0.903)	-	Cytoplasmiceffector	gb|PQE05589.1|	188	190	1	188	188	7	0	0	6.67e-134	hypothetical protein CJF30_00007743 [Rutstroemia sp. NJR-2017a BBW]	tig00000001_pilon_C.paspali	6210768	6211543
g2003.t1	Y(0.903)	-	Cytoplasmiceffector	gb|PQE25052.1|	188	215	1	188	188	9	0	0	2.96e-125	hypothetical protein CJF31_00005902 [Rutstroemia sp. NJR-2017a BVV2]	tig00000001_pilon_C.paspali	6210768	6211543
g2003.t1	Y(0.903)	-	Cytoplasmiceffector	gb|TGO21358.1|	188	194	1	188	193	20	1	5	4.45e-115	hypothetical protein BPAE_0224g00060 [Botrytis paeoniae]	tig00000001_pilon_C.paspali	6210768	6211543
g2003.t1	Y(0.903)	-	Cytoplasmiceffector	gb|TGO39472.1|	188	189	1	188	188	20	0	0	1.67e-117	hypothetical protein BHYA_0053g00270 [Botrytis hyacinthi]	tig00000001_pilon_C.paspali	6210768	6211543
g2003.t1	Y(0.903)	-	Cytoplasmiceffector	gb|TGO52139.1|	188	194	1	188	193	20	1	5	4.75e-115	hypothetical protein BCON_0147g00260 [Botryotinia convoluta]	tig00000001_pilon_C.paspali	6210768	6211543
g2003.t1	Y(0.903)	-	Cytoplasmiceffector	gb|TGO62852.1|	188	194	1	188	193	22	1	5	2.95e-120	hypothetical protein BOTNAR_0108g00130 [Botryotinia narcissicola]	tig00000001_pilon_C.paspali	6210768	6211543
g2003.t1	Y(0.903)	-	Cytoplasmiceffector	ref|XP_001587462.1|	188	189	1	188	188	21	0	0	1.5e-117	hypothetical protein SS1G_11454 [Sclerotinia sclerotiorum 1980 UF-70]	tig00000001_pilon_C.paspali	6210768	6211543
g2003.t1	Y(0.903)	-	Cytoplasmiceffector	ref|XP_024550507.1|	188	189	1	188	188	19	0	0	3.34e-118	hypothetical protein BCIN_08g05390 [Botrytis cinerea B05.10]	tig00000001_pilon_C.paspali	6210768	6211543
g202.t1	Y(0.936)	-	Cytoplasmiceffector	gb|KEQ87894.1|	108	142	2	84	84	60	1	1	4.6	hypothetical protein M438DRAFT_134533 [Aureobasidium pullulans EXF-150]	tig00000001_pilon_C.paspali	532253	532579
g202.t1	Y(0.936)	-	Cytoplasmiceffector	gb|PKO23803.1|	108	489	41	96	56	40	0	0	7.2	UDP-N-acetylmuramoylalanyl-D-glutamyl-2, 6-diaminopimelate--D-alanyl-D-alanine ligase [Chloroflexi bacterium HGW-Chloroflexi-1]	tig00000001_pilon_C.paspali	532253	532579
g202.t1	Y(0.936)	-	Cytoplasmiceffector	ref|WP_119742704.1|	108	172	22	92	71	47	1	4	3	general secretion pathway protein GspN [Pseudomonas sp. Larv2_ips]	tig00000001_pilon_C.paspali	532253	532579
g202.t1	Y(0.936)	-	Cytoplasmiceffector	ref|WP_124418009.1|	108	172	22	92	71	48	1	4	4	general secretion pathway protein GspN [Pseudomonas sp. LBUM920]	tig00000001_pilon_C.paspali	532253	532579
g202.t1	Y(0.936)	-	Cytoplasmiceffector	ref|XP_003556547.1|	108	750	10	98	94	63	3	5	2.7	ABC transporter G family member 6 [Glycine max]	tig00000001_pilon_C.paspali	532253	532579
g202.t1	Y(0.936)	-	Cytoplasmiceffector	ref|XP_028220051.1|	108	750	10	98	94	63	3	5	2.7	ABC transporter G family member 6-like [Glycine soja]	tig00000001_pilon_C.paspali	532253	532579
g2030.t1	Y(0.922)	-	Cytoplasmiceffector	gb|PMD49059.1|	94	649	4	94	94	54	1	3	5.38e-12	hypothetical protein L207DRAFT_20630 [Hyaloscypha variabilis F]	tig00000001_pilon_C.paspali	6282417	6282701
g2030.t1	Y(0.922)	-	Cytoplasmiceffector	gb|PQE13327.1|	94	929	5	94	93	46	1	3	4.18e-12	Vegetative incompatibility HET-E-1 protein [Rutstroemia sp. NJR-2017a BVV2]	tig00000001_pilon_C.paspali	6282417	6282701
g2030.t1	Y(0.922)	-	Cytoplasmiceffector	gb|PQE22020.1|	94	861	7	94	96	52	1	8	7.9e-08	Vegetative incompatibility HET-E-1 protein [Rutstroemia sp. NJR-2017a BBW]	tig00000001_pilon_C.paspali	6282417	6282701
g2030.t1	Y(0.922)	-	Cytoplasmiceffector	gb|PQE32435.1|	94	936	5	94	93	45	1	3	8.23e-13	Vegetative incompatibility HET-E-1 protein [Rutstroemia sp. NJR-2017a WRK4]	tig00000001_pilon_C.paspali	6282417	6282701
g2030.t1	Y(0.922)	-	Cytoplasmiceffector	gb|PVH69750.1|	94	911	3	94	95	62	2	5	0.00017	hypothetical protein DL98DRAFT_522008 [Cadophora sp. DSE1049]	tig00000001_pilon_C.paspali	6282417	6282701
g2030.t1	Y(0.922)	-	Cytoplasmiceffector	gb|PVI00440.1|	94	655	3	94	95	62	1	3	5.34e-05	hypothetical protein DM02DRAFT_473949, partial [Periconia macrospinosa]	tig00000001_pilon_C.paspali	6282417	6282701
g2030.t1	Y(0.922)	-	Cytoplasmiceffector	gb|RFU28901.1|	94	929	1	94	101	62	2	7	6.32e-07	hypothetical protein B7463_g7422, partial [Scytalidium lignicola]	tig00000001_pilon_C.paspali	6282417	6282701
g2030.t1	Y(0.922)	-	Cytoplasmiceffector	gb|TGO75665.1|	94	941	1	94	94	53	1	3	1.9e-12	hypothetical protein BELL_0199g00010 [Botrytis elliptica]	tig00000001_pilon_C.paspali	6282417	6282701
g2030.t1	Y(0.922)	-	Cytoplasmiceffector	ref|XP_007685691.1|	94	549	46	94	49	28	0	0	0.011	hypothetical protein COCMIDRAFT_58713, partial [Bipolaris oryzae ATCC 44560]	tig00000001_pilon_C.paspali	6282417	6282701
g2030.t1	Y(0.922)	-	Cytoplasmiceffector	ref|XP_020128434.1|	94	1031	5	94	91	58	2	2	7.86e-05	hypothetical protein BKCO1_4000046 [Diplodia corticola]	tig00000001_pilon_C.paspali	6282417	6282701
g2130.t1	Y(0.957)	Y(0.511)	Cytoplasmic/apoplasticeffector	gb|PQE17181.1|	130	224	1	39	39	8	0	0	3.13e-10	O-methyltransferase family 3 protein [Rutstroemia sp. NJR-2017a WRK4]	tig00000001_pilon_C.paspali	6561427	6562026
g2130.t1	Y(0.957)	Y(0.511)	Cytoplasmic/apoplasticeffector	gb|PQE17367.1|	130	237	1	39	39	8	0	0	2.13e-10	O-methyltransferase family 3 protein [Rutstroemia sp. NJR-2017a BVV2]	tig00000001_pilon_C.paspali	6561427	6562026
g2130.t1	Y(0.957)	Y(0.511)	Cytoplasmic/apoplasticeffector	gb|PQE26364.1|	130	151	11	39	29	6	0	0	0.000215	O-methyltransferase family 3 protein [Rutstroemia sp. NJR-2017a BBW]	tig00000001_pilon_C.paspali	6561427	6562026
g2130.t1	Y(0.957)	Y(0.511)	Cytoplasmic/apoplasticeffector	gb|TGO12588.1|	130	240	2	39	38	16	0	0	0.001	hypothetical protein BTUL_0086g00640 [Botrytis tulipae]	tig00000001_pilon_C.paspali	6561427	6562026
g2130.t1	Y(0.957)	Y(0.511)	Cytoplasmic/apoplasticeffector	gb|TGO28143.1|	130	240	2	39	38	16	0	0	0.001	hypothetical protein BPAE_0031g00080 [Botrytis paeoniae]	tig00000001_pilon_C.paspali	6561427	6562026
g2130.t1	Y(0.957)	Y(0.511)	Cytoplasmic/apoplasticeffector	gb|TGO49307.1|	130	240	2	39	38	15	0	0	0.000504	hypothetical protein BCON_0214g00230 [Botryotinia convoluta]	tig00000001_pilon_C.paspali	6561427	6562026
g2130.t1	Y(0.957)	Y(0.511)	Cytoplasmic/apoplasticeffector	gb|TGO67732.1|	130	240	2	39	38	16	0	0	0.001	hypothetical protein BOTNAR_0036g00070 [Botryotinia narcissicola]	tig00000001_pilon_C.paspali	6561427	6562026
g2130.t1	Y(0.957)	Y(0.511)	Cytoplasmic/apoplasticeffector	gb|TGO71133.1|	130	240	2	39	38	15	0	0	0.000461	hypothetical protein BELL_0615g00010 [Botrytis elliptica]	tig00000001_pilon_C.paspali	6561427	6562026
g2130.t1	Y(0.957)	Y(0.511)	Cytoplasmic/apoplasticeffector	gb|THV54898.1|	130	240	2	39	38	16	0	0	0.001	hypothetical protein BGAL_0018g00540 [Botrytis galanthina]	tig00000001_pilon_C.paspali	6561427	6562026
g2130.t1	Y(0.957)	Y(0.511)	Cytoplasmic/apoplasticeffector	ref|XP_024548232.1|	130	240	2	39	38	15	0	0	0.000494	hypothetical protein BCIN_04g02400 [Botrytis cinerea B05.10]	tig00000001_pilon_C.paspali	6561427	6562026
g2136.t1	Y(0.904)	-	Cytoplasmiceffector	gb|ESZ97124.1|	307	437	178	307	137	74	4	9	2.24e-18	hypothetical protein SBOR_2482 [Sclerotinia borealis F-4128]	tig00000001_pilon_C.paspali	6571685	6572608
g2136.t1	Y(0.904)	-	Cytoplasmiceffector	gb|RAL64503.1|	307	672	180	298	123	66	3	6	5.24e-17	hypothetical protein DID88_001978 [Monilinia fructigena]	tig00000001_pilon_C.paspali	6571685	6572608
g2136.t1	Y(0.904)	-	Cytoplasmiceffector	gb|TGO15556.1|	307	538	137	296	164	95	6	18	1.13e-08	hypothetical protein BTUL_0039g00750 [Botrytis tulipae]	tig00000001_pilon_C.paspali	6571685	6572608
g2136.t1	Y(0.904)	-	Cytoplasmiceffector	gb|TGO28136.1|	307	517	175	296	128	76	4	10	5.06e-09	hypothetical protein BPAE_0031g00010 [Botrytis paeoniae]	tig00000001_pilon_C.paspali	6571685	6572608
g2136.t1	Y(0.904)	-	Cytoplasmiceffector	gb|TGO34997.1|	307	556	175	296	126	82	3	6	7.62e-08	hypothetical protein BHYA_0174g00220 [Botrytis hyacinthi]	tig00000001_pilon_C.paspali	6571685	6572608
g2136.t1	Y(0.904)	-	Cytoplasmiceffector	gb|TGO49301.1|	307	578	175	296	126	81	3	6	6.07e-09	hypothetical protein BCON_0214g00170 [Botryotinia convoluta]	tig00000001_pilon_C.paspali	6571685	6572608
g2136.t1	Y(0.904)	-	Cytoplasmiceffector	gb|TGO67737.1|	307	547	175	296	126	81	3	6	5.64e-08	hypothetical protein BOTNAR_0036g00120 [Botryotinia narcissicola]	tig00000001_pilon_C.paspali	6571685	6572608
g2136.t1	Y(0.904)	-	Cytoplasmiceffector	gb|TGO71137.1|	307	535	139	296	162	99	5	16	8.32e-09	hypothetical protein BELL_0615g00050 [Botrytis elliptica]	tig00000001_pilon_C.paspali	6571685	6572608
g2136.t1	Y(0.904)	-	Cytoplasmiceffector	gb|THV54902.1|	307	535	58	296	262	155	11	40	5.43e-07	hypothetical protein BGAL_0018g00580 [Botrytis galanthina]	tig00000001_pilon_C.paspali	6571685	6572608
g2136.t1	Y(0.904)	-	Cytoplasmiceffector	ref|XP_001595812.1|	307	691	152	296	149	85	4	7	1.59e-17	predicted protein [Sclerotinia sclerotiorum 1980 UF-70]	tig00000001_pilon_C.paspali	6571685	6572608
g2141.t1	Y(0.987)	-	Cytoplasmiceffector	emb|CZS89033.1|	98	98	1	98	98	6	0	0	3.77e-60	probable snRNA-associated protein LSM2 [Rhynchosporium commune]	tig00000001_pilon_C.paspali	6581738	6582242
g2141.t1	Y(0.987)	-	Cytoplasmiceffector	gb|APA05897.1|	98	98	1	98	98	1	0	0	4.73e-64	hypothetical protein sscle_01g006670 [Sclerotinia sclerotiorum 1980 UF-70]	tig00000001_pilon_C.paspali	6581738	6582242
g2141.t1	Y(0.987)	-	Cytoplasmiceffector	gb|ESZ92817.1|	98	98	1	98	98	0	0	0	1.67e-64	small nuclear ribonucleoprotein LSM2 [Sclerotinia borealis F-4128]	tig00000001_pilon_C.paspali	6581738	6582242
g2141.t1	Y(0.987)	-	Cytoplasmiceffector	gb|PQE24118.1|	98	95	6	98	93	0	0	0	2.33e-60	small nuclear ribonucleo LSM2 protein [Rutstroemia sp. NJR-2017a BVV2]	tig00000001_pilon_C.paspali	6581738	6582242
g2141.t1	Y(0.987)	-	Cytoplasmiceffector	gb|PVH84236.1|	98	98	1	98	98	5	0	0	5.39e-61	LSM domain-containing protein [Cadophora sp. DSE1049]	tig00000001_pilon_C.paspali	6581738	6582242
g2141.t1	Y(0.987)	-	Cytoplasmiceffector	gb|RAL61687.1|	98	98	1	98	98	1	0	0	1.06e-63	hypothetical protein DID88_002755 [Monilinia fructigena]	tig00000001_pilon_C.paspali	6581738	6582242
g2141.t1	Y(0.987)	-	Cytoplasmiceffector	gb|RDL38538.1|	98	98	1	98	98	7	0	0	7.86e-60	Uncharacterized protein BP5553_02878 [Phialophora cf. hyalina BP 5553]	tig00000001_pilon_C.paspali	6581738	6582242
g2141.t1	Y(0.987)	-	Cytoplasmiceffector	gb|TEY81851.1|	98	98	1	98	98	5	0	0	4.89e-61	hypothetical protein BOTCAL_0031g00430 [Botryotinia calthae]	tig00000001_pilon_C.paspali	6581738	6582242
g2141.t1	Y(0.987)	-	Cytoplasmiceffector	ref|XP_024547021.1|	98	98	1	98	98	4	0	0	6.85e-62	Bclsm2 [Botrytis cinerea B05.10]	tig00000001_pilon_C.paspali	6581738	6582242
g2141.t1	Y(0.987)	-	Cytoplasmiceffector	ref|XP_024723770.1|	98	98	1	98	98	8	0	0	1.64e-59	hypothetical protein M430DRAFT_63777 [Amorphotheca resinae ATCC 22711]	tig00000001_pilon_C.paspali	6581738	6582242
g2142.t1	Y(0.952)	-	Cytoplasmiceffector	gb|OIT31198.1|	71	535	28	66	39	24	0	0	1.3	helicase protein mom1 [Nicotiana attenuata]	tig00000001_pilon_C.paspali	6582765	6582980
g2142.t1	Y(0.952)	-	Cytoplasmiceffector	ref|XP_009629063.1|	71	1413	28	66	39	24	0	0	1.8	PREDICTED: chromodomain-helicase-DNA-binding protein Mi-2 homolog isoform X2 [Nicotiana tomentosiformis]	tig00000001_pilon_C.paspali	6582765	6582980
g2142.t1	Y(0.952)	-	Cytoplasmiceffector	ref|XP_009629064.1|	71	1389	28	66	39	24	0	0	1.7	PREDICTED: chromodomain-helicase-DNA-binding protein Mi-2 homolog isoform X3 [Nicotiana tomentosiformis]	tig00000001_pilon_C.paspali	6582765	6582980
g2142.t1	Y(0.952)	-	Cytoplasmiceffector	ref|XP_009629065.1|	71	1251	28	66	39	24	0	0	1.7	PREDICTED: uncharacterized protein LOC104119302 isoform X4 [Nicotiana tomentosiformis]	tig00000001_pilon_C.paspali	6582765	6582980
g2142.t1	Y(0.952)	-	Cytoplasmiceffector	ref|XP_009784236.1|	71	1332	28	66	39	24	0	0	0.51	PREDICTED: chromodomain-helicase-DNA-binding protein 3 homolog, partial [Nicotiana sylvestris]	tig00000001_pilon_C.paspali	6582765	6582980
g2142.t1	Y(0.952)	-	Cytoplasmiceffector	ref|XP_016454072.1|	71	1222	28	66	39	24	0	0	0.53	PREDICTED: chromodomain-helicase-DNA-binding protein 3-like [Nicotiana tabacum]	tig00000001_pilon_C.paspali	6582765	6582980
g2142.t1	Y(0.952)	-	Cytoplasmiceffector	ref|XP_016470560.1|	71	1416	28	66	39	24	0	0	1.7	PREDICTED: chromodomain-helicase-DNA-binding protein Mi-2 homolog isoform X1 [Nicotiana tabacum]	tig00000001_pilon_C.paspali	6582765	6582980
g2142.t1	Y(0.952)	-	Cytoplasmiceffector	ref|XP_016470562.1|	71	1389	28	66	39	24	0	0	1.7	PREDICTED: chromodomain-helicase-DNA-binding protein Mi-2 homolog isoform X3 [Nicotiana tabacum]	tig00000001_pilon_C.paspali	6582765	6582980
g2142.t1	Y(0.952)	-	Cytoplasmiceffector	ref|XP_016470563.1|	71	1251	28	66	39	24	0	0	1.7	PREDICTED: uncharacterized protein LOC107792831 isoform X4 [Nicotiana tabacum]	tig00000001_pilon_C.paspali	6582765	6582980
g2142.t1	Y(0.952)	-	Cytoplasmiceffector	ref|XP_016470564.1|	71	1223	28	66	39	24	0	0	1.6	PREDICTED: chromodomain-helicase-DNA-binding protein 3-like isoform X5 [Nicotiana tabacum]	tig00000001_pilon_C.paspali	6582765	6582980
g2145.t1	Y(0.915)	Y(0.683)	Cytoplasmic/apoplasticeffector	ref|WP_094335406.1|	97	245	13	90	78	55	0	0	2.2	response regulator transcription factor [[Collinsella] massiliensis]	tig00000001_pilon_C.paspali	6594332	6594625
g2173.t1	Y(0.924)	-	Cytoplasmiceffector	emb|CZS88382.1|	143	143	1	143	143	6	0	0	5.96e-99	probable spliceosomal U5 snRNP-specific 15 kDa protein [Rhynchosporium agropyri]	tig00000001_pilon_C.paspali	6682279	6683156
g2173.t1	Y(0.924)	-	Cytoplasmiceffector	emb|SLM36357.1|	143	143	1	143	143	6	0	0	5.9e-99	mitosis protein dim1 [Umbilicaria pustulata]	tig00000001_pilon_C.paspali	6682279	6683156
g2173.t1	Y(0.924)	-	Cytoplasmiceffector	gb|OCK94123.1|	143	143	1	143	143	6	0	0	1.79e-98	mitosis protein dim1 [Cenococcum geophilum 1.58]	tig00000001_pilon_C.paspali	6682279	6683156
g2173.t1	Y(0.924)	-	Cytoplasmiceffector	gb|OCL07024.1|	143	143	1	143	143	8	0	0	2.65e-98	4A/4B type thioredoxin-like protein [Glonium stellatum]	tig00000001_pilon_C.paspali	6682279	6683156
g2173.t1	Y(0.924)	-	Cytoplasmiceffector	gb|PMD15507.1|	143	143	1	143	143	6	0	0	1.33e-98	thioredoxin-like protein 4A [Pezoloma ericae]	tig00000001_pilon_C.paspali	6682279	6683156
g2173.t1	Y(0.924)	-	Cytoplasmiceffector	gb|PQE07017.1|	143	143	1	143	143	0	0	0	7.6e-103	mitosis dim1 protein [Rutstroemia sp. NJR-2017a BBW]	tig00000001_pilon_C.paspali	6682279	6683156
g2173.t1	Y(0.924)	-	Cytoplasmiceffector	ref|XP_007289938.1|	143	143	1	143	143	5	0	0	3.3e-99	mitosis protein dim1 [Marssonina brunnea f. sp. 'multigermtubi' MB_m1]	tig00000001_pilon_C.paspali	6682279	6683156
g2173.t1	Y(0.924)	-	Cytoplasmiceffector	ref|XP_007776466.1|	143	143	1	143	143	4	0	0	7.01e-100	thioredoxin-like protein 4A [Coniosporium apollinis CBS 100218]	tig00000001_pilon_C.paspali	6682279	6683156
g2173.t1	Y(0.924)	-	Cytoplasmiceffector	ref|XP_020131170.1|	143	143	1	143	143	7	0	0	2.11e-98	mitosis protein dim1 [Diplodia corticola]	tig00000001_pilon_C.paspali	6682279	6683156
g2173.t1	Y(0.924)	-	Cytoplasmiceffector	ref|XP_024735379.1|	143	143	1	143	143	6	0	0	2.04e-98	4A/4B type thioredoxin-like protein [Meliniomyces bicolor E]	tig00000001_pilon_C.paspali	6682279	6683156
g2205.t1	Y(0.9)	-	Cytoplasmiceffector	gb|ESZ98579.1|	291	292	1	291	292	45	1	1	1.28e-169	hypothetical protein SBOR_1029 [Sclerotinia borealis F-4128]	tig00000001_pilon_C.paspali	6787611	6788486
g2205.t1	Y(0.9)	-	Cytoplasmiceffector	gb|PQE24193.1|	291	292	1	291	292	17	1	1	3.33e-175	hypothetical protein CJF31_00002410 [Rutstroemia sp. NJR-2017a BVV2]	tig00000001_pilon_C.paspali	6787611	6788486
g2205.t1	Y(0.9)	-	Cytoplasmiceffector	gb|PQE33756.1|	291	292	1	291	292	18	1	1	3.59e-174	hypothetical protein CJF32_00009987 [Rutstroemia sp. NJR-2017a WRK4]	tig00000001_pilon_C.paspali	6787611	6788486
g2205.t1	Y(0.9)	-	Cytoplasmiceffector	gb|RAL61611.1|	291	292	1	291	292	37	1	1	7.85e-180	hypothetical protein DID88_009649 [Monilinia fructigena]	tig00000001_pilon_C.paspali	6787611	6788486
g2205.t1	Y(0.9)	-	Cytoplasmiceffector	gb|TGO15306.1|	291	291	1	291	292	44	2	2	1.26e-161	hypothetical protein BTUL_0042g00770 [Botrytis tulipae]	tig00000001_pilon_C.paspali	6787611	6788486
g2205.t1	Y(0.9)	-	Cytoplasmiceffector	gb|TGO27935.1|	291	291	1	291	292	44	2	2	1.26e-161	hypothetical protein BPAE_0034g00140 [Botrytis paeoniae]	tig00000001_pilon_C.paspali	6787611	6788486
g2205.t1	Y(0.9)	-	Cytoplasmiceffector	gb|TGO59613.1|	291	291	1	291	292	44	2	2	1.26e-161	hypothetical protein BOTNAR_0159g00120 [Botryotinia narcissicola]	tig00000001_pilon_C.paspali	6787611	6788486
g2205.t1	Y(0.9)	-	Cytoplasmiceffector	gb|THV50006.1|	291	291	1	291	292	44	2	2	1.26e-161	hypothetical protein BGAL_0169g00170 [Botrytis galanthina]	tig00000001_pilon_C.paspali	6787611	6788486
g2205.t1	Y(0.9)	-	Cytoplasmiceffector	ref|XP_001546024.1|	291	291	1	291	292	38	2	2	9.48e-171	Bcrrp15 [Botrytis cinerea B05.10]	tig00000001_pilon_C.paspali	6787611	6788486
g2205.t1	Y(0.9)	-	Cytoplasmiceffector	ref|XP_001595677.1|	291	292	1	291	292	36	1	1	5.51e-175	hypothetical protein SS1G_03766 [Sclerotinia sclerotiorum 1980 UF-70]	tig00000001_pilon_C.paspali	6787611	6788486
g2254.t1	Y(0.902)	-	Cytoplasmiceffector	emb|CZR65378.1|	121	122	1	121	122	29	1	1	1.13e-59	probable Long chronological lifespan protein 2 [Phialocephala subalpina]	tig00000001_pilon_C.paspali	6911986	6912427
g2254.t1	Y(0.902)	-	Cytoplasmiceffector	gb|PBP23189.1|	121	120	6	121	117	27	1	1	7.97e-61	hypothetical protein BUE80_DR005834 [Diplocarpon rosae]	tig00000001_pilon_C.paspali	6911986	6912427
g2254.t1	Y(0.902)	-	Cytoplasmiceffector	gb|PQE17916.1|	121	120	1	121	121	2	1	1	1.69e-81	long chronological lifespan 2 protein [Rutstroemia sp. NJR-2017a WRK4]	tig00000001_pilon_C.paspali	6911986	6912427
g2254.t1	Y(0.902)	-	Cytoplasmiceffector	gb|PQE22849.1|	121	120	1	121	121	3	1	1	2.2e-81	long chronological lifespan 2 protein [Rutstroemia sp. NJR-2017a BBW]	tig00000001_pilon_C.paspali	6911986	6912427
g2254.t1	Y(0.902)	-	Cytoplasmiceffector	gb|PQE24209.1|	121	120	1	121	121	3	1	1	5.1e-82	long chronological lifespan 2 protein [Rutstroemia sp. NJR-2017a BVV2]	tig00000001_pilon_C.paspali	6911986	6912427
g2254.t1	Y(0.902)	-	Cytoplasmiceffector	gb|RDW95088.1|	121	120	1	121	121	35	1	1	4.37e-58	putative long chronological lifespan protein 2 [Coleophoma crateriformis]	tig00000001_pilon_C.paspali	6911986	6912427
g2254.t1	Y(0.902)	-	Cytoplasmiceffector	gb|TGO92570.1|	121	120	1	121	121	21	1	1	4.13e-61	hypothetical protein BPOR_0001g00550 [Botrytis porri]	tig00000001_pilon_C.paspali	6911986	6912427
g2254.t1	Y(0.902)	-	Cytoplasmiceffector	ref|XP_001597671.1|	121	119	18	121	106	13	1	2	4.93e-58	hypothetical protein SS1G_01867 [Sclerotinia sclerotiorum 1980 UF-70]	tig00000001_pilon_C.paspali	6911986	6912427
g2254.t1	Y(0.902)	-	Cytoplasmiceffector	ref|XP_018061075.1|	121	121	1	121	121	29	0	0	1.18e-58	hypothetical protein LY89DRAFT_602844 [Phialocephala scopiformis]	tig00000001_pilon_C.paspali	6911986	6912427
g2254.t1	Y(0.902)	-	Cytoplasmiceffector	ref|XP_024723333.1|	121	121	1	121	121	35	0	0	2.69e-59	hypothetical protein M430DRAFT_40476 [Amorphotheca resinae ATCC 22711]	tig00000001_pilon_C.paspali	6911986	6912427
g2311.t1	Y(0.926)	-	Cytoplasmiceffector	emb|CCD55628.1|	197	197	1	197	197	21	0	0	3.55e-132	similar to snare protein ykt6 [Botrytis cinerea T4]	tig00000001_pilon_C.paspali	7078868	7079678
g2311.t1	Y(0.926)	-	Cytoplasmiceffector	gb|ESZ94208.1|	197	197	1	197	197	19	0	0	1.51e-133	putative SNARE protein [Sclerotinia borealis F-4128]	tig00000001_pilon_C.paspali	7078868	7079678
g2311.t1	Y(0.926)	-	Cytoplasmiceffector	gb|PQE17952.1|	197	208	1	197	208	5	2	11	1.78e-137	hypothetical protein CJF32_00008436 [Rutstroemia sp. NJR-2017a WRK4]	tig00000001_pilon_C.paspali	7078868	7079678
g2311.t1	Y(0.926)	-	Cytoplasmiceffector	gb|RAL60283.1|	197	197	1	197	197	18	0	0	1.92e-134	hypothetical protein DID88_000063 [Monilinia fructigena]	tig00000001_pilon_C.paspali	7078868	7079678
g2311.t1	Y(0.926)	-	Cytoplasmiceffector	gb|TGO11322.1|	197	197	1	197	197	18	0	0	3.58e-134	hypothetical protein BTUL_0112g00120 [Botrytis tulipae]	tig00000001_pilon_C.paspali	7078868	7079678
g2311.t1	Y(0.926)	-	Cytoplasmiceffector	gb|TGO29114.1|	197	202	1	197	202	17	1	5	1.3e-132	hypothetical protein BPAE_0019g00490 [Botrytis paeoniae]	tig00000001_pilon_C.paspali	7078868	7079678
g2311.t1	Y(0.926)	-	Cytoplasmiceffector	gb|TGO61976.1|	197	197	1	197	197	17	0	0	5.54e-135	hypothetical protein BCON_0023g00350 [Botryotinia convoluta]	tig00000001_pilon_C.paspali	7078868	7079678
g2311.t1	Y(0.926)	-	Cytoplasmiceffector	gb|THV47731.1|	197	197	1	197	197	19	0	0	1.82e-133	hypothetical protein BGAL_0292g00090 [Botrytis galanthina]	tig00000001_pilon_C.paspali	7078868	7079678
g2311.t1	Y(0.926)	-	Cytoplasmiceffector	ref|XP_001547459.1|	197	197	1	197	197	20	0	0	1.84e-132	Bcykt6 [Botrytis cinerea B05.10]	tig00000001_pilon_C.paspali	7078868	7079678
g2311.t1	Y(0.926)	-	Cytoplasmiceffector	ref|XP_001585978.1|	197	197	1	197	197	18	0	0	3.66e-134	hypothetical protein SS1G_13070 [Sclerotinia sclerotiorum 1980 UF-70]	tig00000001_pilon_C.paspali	7078868	7079678
g2321.t1	Y(0.909)	Y(0.567)	Cytoplasmic/apoplasticeffector	emb|CZR63920.1|	205	205	1	205	205	9	0	0	4.2e-143	GTP-binding protein SAS1 [Phialocephala subalpina]	tig00000001_pilon_C.paspali	7101514	7102399
g2321.t1	Y(0.909)	Y(0.567)	Cytoplasmic/apoplasticeffector	emb|CZS91953.1|	205	205	1	205	205	9	0	0	3.16e-143	GTP-binding protein SAS1 [Rhynchosporium agropyri]	tig00000001_pilon_C.paspali	7101514	7102399
g2321.t1	Y(0.909)	Y(0.567)	Cytoplasmic/apoplasticeffector	gb|MBV34224.1|	205	205	1	205	205	7	0	0	2.5e-144	hypothetical protein [Rickettsiales bacterium]	tig00000001_pilon_C.paspali	7101514	7102399
g2321.t1	Y(0.909)	Y(0.567)	Cytoplasmic/apoplasticeffector	gb|OWP00128.1|	205	203	1	205	205	11	1	2	3.68e-139	secretion related Rab/GTPase [Marssonina coronariae]	tig00000001_pilon_C.paspali	7101514	7102399
g2321.t1	Y(0.909)	Y(0.567)	Cytoplasmic/apoplasticeffector	gb|PQE17948.1|	205	205	1	205	205	1	0	0	5.14e-147	GTP-binding SAS1 protein [Rutstroemia sp. NJR-2017a WRK4]	tig00000001_pilon_C.paspali	7101514	7102399
g2321.t1	Y(0.909)	Y(0.567)	Cytoplasmic/apoplasticeffector	gb|PVH73343.1|	205	205	1	205	205	8	0	0	8.94e-144	rab GTPase [Cadophora sp. DSE1049]	tig00000001_pilon_C.paspali	7101514	7102399
g2321.t1	Y(0.909)	Y(0.567)	Cytoplasmic/apoplasticeffector	ref|XP_001547449.1|	205	203	1	205	205	7	1	2	4.34e-139	Bcsas1 [Botrytis cinerea B05.10]	tig00000001_pilon_C.paspali	7101514	7102399
g2321.t1	Y(0.909)	Y(0.567)	Cytoplasmic/apoplasticeffector	ref|XP_007288509.1|	205	203	1	205	205	8	1	2	4.06e-140	secretion related Rab/GTPase [Marssonina brunnea f. sp. 'multigermtubi' MB_m1]	tig00000001_pilon_C.paspali	7101514	7102399
g2321.t1	Y(0.909)	Y(0.567)	Cytoplasmic/apoplasticeffector	ref|XP_018068758.1|	205	205	1	205	205	10	0	0	2.68e-142	rab GTPase [Phialocephala scopiformis]	tig00000001_pilon_C.paspali	7101514	7102399
g2321.t1	Y(0.909)	Y(0.567)	Cytoplasmic/apoplasticeffector	ref|XP_024718344.1|	205	204	1	205	206	4	2	3	1.37e-140	hypothetical protein M430DRAFT_44284 [Amorphotheca resinae ATCC 22711]	tig00000001_pilon_C.paspali	7101514	7102399
g2381.t1	Y(0.924)	-	Cytoplasmiceffector	gb|OUS45396.1|	112	395	28	103	83	50	2	9	2.2	transaldolase ToTAL2 [Ostreococcus tauri]	tig00000001_pilon_C.paspali	7252149	7252487
g2381.t1	Y(0.924)	-	Cytoplasmiceffector	gb|PYF06223.1|	112	295	28	92	72	45	1	7	2.1	5'-3' exonuclease [Lysinibacillus chungkukjangi]	tig00000001_pilon_C.paspali	7252149	7252487
g2381.t1	Y(0.924)	-	Cytoplasmiceffector	ref|WP_036201142.1|	112	297	28	88	68	39	1	7	0.47	5'-3' exonuclease [Lysinibacillus sinduriensis]	tig00000001_pilon_C.paspali	7252149	7252487
g2381.t1	Y(0.924)	-	Cytoplasmiceffector	ref|WP_042351710.1|	112	264	10	102	95	65	3	5	6.1	aspartate/glutamate racemase family protein [Bacillus massiliogorillae]	tig00000001_pilon_C.paspali	7252149	7252487
g2381.t1	Y(0.924)	-	Cytoplasmiceffector	ref|WP_107935083.1|	112	296	28	92	72	45	1	7	2.2	5'-3' exonuclease [Lysinibacillus chungkukjangi]	tig00000001_pilon_C.paspali	7252149	7252487
g2381.t1	Y(0.924)	-	Cytoplasmiceffector	ref|XP_003083899.2|	112	369	28	103	83	50	2	9	2.1	Transaldolase [Ostreococcus tauri]	tig00000001_pilon_C.paspali	7252149	7252487
g2396.t1	Y(0.912)	Y(0.571)	Cytoplasmic/apoplasticeffector	gb|MBC34651.1|	76	915	15	59	45	30	0	0	3.7	hypothetical protein [Bacteroidetes bacterium]	tig00000001_pilon_C.paspali	7295672	7295902
g2416.t1	Y(0.968)	Y(0.507)	Cytoplasmic/apoplasticeffector	gb|PNW76785.1|	127	3000	49	124	76	54	1	2	0.58	hypothetical protein CHLRE_11g476050v5 [Chlamydomonas reinhardtii]	tig00000001_pilon_C.paspali	7343848	7344231
g2416.t1	Y(0.968)	Y(0.507)	Cytoplasmic/apoplasticeffector	ref|WP_006751045.1|	127	369	41	108	68	44	1	1	8.1	DUF262 domain-containing protein [Burkholderia ambifaria]	tig00000001_pilon_C.paspali	7343848	7344231
g2416.t1	Y(0.968)	Y(0.507)	Cytoplasmic/apoplasticeffector	ref|WP_056836139.1|	127	869	33	81	50	30	1	1	6.4	TonB-dependent receptor [Pseudomonas sp. Leaf127]	tig00000001_pilon_C.paspali	7343848	7344231
g2416.t1	Y(0.968)	Y(0.507)	Cytoplasmic/apoplasticeffector	ref|WP_122467235.1|	127	869	33	81	50	30	1	1	6.4	TonB-dependent receptor [Pseudomonas sp. 286]	tig00000001_pilon_C.paspali	7343848	7344231
g2416.t1	Y(0.968)	Y(0.507)	Cytoplasmic/apoplasticeffector	ref|WP_122701177.1|	127	869	33	81	50	30	1	1	6.4	TonB-dependent receptor [Pseudomonas sp. 286]	tig00000001_pilon_C.paspali	7343848	7344231
g2416.t1	Y(0.968)	Y(0.507)	Cytoplasmic/apoplasticeffector	ref|WP_122803211.1|	127	869	33	81	50	30	1	1	6.4	TonB-dependent receptor [Pseudomonas sp. 286]	tig00000001_pilon_C.paspali	7343848	7344231
g2416.t1	Y(0.968)	Y(0.507)	Cytoplasmic/apoplasticeffector	ref|XP_001620268.1|	127	747	24	110	89	56	3	5	4.2	hypothetical protein NEMVEDRAFT_v1g223284 [Nematostella vectensis]	tig00000001_pilon_C.paspali	7343848	7344231
g2492.t1	Y(0.962)	-	Cytoplasmiceffector	gb|AKI80492.1|	78	740	19	50	32	21	0	0	8	putative F-box/LRR-repeat protein [Acanthamoeba polyphaga mimivirus]	tig00000001_pilon_C.paspali	7517876	7518112
g2492.t1	Y(0.962)	-	Cytoplasmiceffector	ref|WP_033826715.1|	78	125	21	48	29	11	1	1	4.8	DUF1992 domain-containing protein [Bacillus andreraoultii]	tig00000001_pilon_C.paspali	7517876	7518112
g2492.t1	Y(0.962)	-	Cytoplasmiceffector	ref|WP_062417573.1|	78	133	19	65	49	28	2	2	1.3	DUF1992 domain-containing protein [Levilinea saccharolytica]	tig00000001_pilon_C.paspali	7517876	7518112
g2492.t1	Y(0.962)	-	Cytoplasmiceffector	ref|WP_087092657.1|	78	591	1	56	65	26	4	12	5.6	MULTISPECIES: hypothetical protein [Pseudomonas]	tig00000001_pilon_C.paspali	7517876	7518112
g2492.t1	Y(0.962)	-	Cytoplasmiceffector	ref|WP_102680420.1|	78	582	1	56	65	26	4	12	7.5	MULTISPECIES: hypothetical protein [Pseudomonas]	tig00000001_pilon_C.paspali	7517876	7518112
g2497.t1	Y(0.926)	-	Cytoplasmiceffector	gb|ESS33308.1|	188	1555	51	115	66	37	2	3	0.000141	zinc finger, c2h2 type domain-containing protein [Toxoplasma gondii VEG]	tig00000001_pilon_C.paspali	7527986	7528609
g2497.t1	Y(0.926)	-	Cytoplasmiceffector	gb|KFG59051.1|	188	1555	51	115	66	37	2	3	0.000141	zinc finger, c2h2 type domain-containing protein [Toxoplasma gondii RUB]	tig00000001_pilon_C.paspali	7527986	7528609
g2497.t1	Y(0.926)	-	Cytoplasmiceffector	gb|KFH00556.1|	188	1555	51	115	66	37	2	3	0.000141	zinc finger, c2h2 type domain-containing protein [Toxoplasma gondii VAND]	tig00000001_pilon_C.paspali	7527986	7528609
g2497.t1	Y(0.926)	-	Cytoplasmiceffector	gb|KYF44536.1|	188	1555	51	115	66	37	2	3	0.000146	zinc finger, c2h2 type domain-containing protein [Toxoplasma gondii ARI]	tig00000001_pilon_C.paspali	7527986	7528609
g2497.t1	Y(0.926)	-	Cytoplasmiceffector	gb|OAO15552.1|	188	346	59	112	54	34	0	0	3.8e-05	hypothetical protein AV274_2734 [Blastocystis sp. ATCC 50177/Nand II]	tig00000001_pilon_C.paspali	7527986	7528609
g2497.t1	Y(0.926)	-	Cytoplasmiceffector	gb|PIM02312.1|	188	1555	51	115	66	37	2	3	0.000146	zinc finger, c2h2 type domain-containing protein [Toxoplasma gondii COUG]	tig00000001_pilon_C.paspali	7527986	7528609
g2497.t1	Y(0.926)	-	Cytoplasmiceffector	gb|PQE24389.1|	188	169	21	164	144	81	3	6	1.45e-21	hypothetical protein CJF31_00002647 [Rutstroemia sp. NJR-2017a BVV2]	tig00000001_pilon_C.paspali	7527986	7528609
g2497.t1	Y(0.926)	-	Cytoplasmiceffector	gb|PQE32580.1|	188	205	24	123	100	59	1	1	6.89e-16	hypothetical protein CJF32_00004135 [Rutstroemia sp. NJR-2017a WRK4]	tig00000001_pilon_C.paspali	7527986	7528609
g2497.t1	Y(0.926)	-	Cytoplasmiceffector	ref|XP_002367846.2|	188	1555	51	115	66	37	2	3	0.000142	zinc finger, c2h2 type domain-containing protein [Toxoplasma gondii ME49]	tig00000001_pilon_C.paspali	7527986	7528609
g2497.t1	Y(0.926)	-	Cytoplasmiceffector	ref|XP_012897013.1|	188	422	59	112	54	33	0	0	3.39e-05	uncharacterized protein [Blastocystis hominis]	tig00000001_pilon_C.paspali	7527986	7528609
g2524.t1	Y(0.902)	-	Cytoplasmiceffector	emb|SMQ54305.1|	167	171	1	163	166	85	3	6	3.26e-38	unnamed protein product [Zymoseptoria tritici ST99CH_3D7]	tig00000001_pilon_C.paspali	7596208	7596777
g2524.t1	Y(0.902)	-	Cytoplasmiceffector	gb|KXT02122.1|	167	186	1	163	166	91	3	6	3.03e-38	hypothetical protein AC579_854 [Pseudocercospora musae]	tig00000001_pilon_C.paspali	7596208	7596777
g2524.t1	Y(0.902)	-	Cytoplasmiceffector	gb|TKA77197.1|	167	174	1	163	172	86	3	12	7.77e-39	hypothetical protein B0A49_01842 [Cryomyces minteri]	tig00000001_pilon_C.paspali	7596208	7596777
g2524.t1	Y(0.902)	-	Cytoplasmiceffector	ref|XP_007680839.1|	167	198	1	165	176	90	4	14	5.5e-39	hypothetical protein BAUCODRAFT_27894 [Baudoinia panamericana UAMH 10762]	tig00000001_pilon_C.paspali	7596208	7596777
g2524.t1	Y(0.902)	-	Cytoplasmiceffector	ref|XP_007739148.1|	167	161	1	158	158	90	1	3	1.45e-38	hypothetical protein A1O5_00338 [Cladophialophora psammophila CBS 110553]	tig00000001_pilon_C.paspali	7596208	7596777
g2524.t1	Y(0.902)	-	Cytoplasmiceffector	ref|XP_013283890.1|	167	161	1	161	161	92	1	2	1.3e-39	hypothetical protein Z517_06697 [Fonsecaea pedrosoi CBS 271.37]	tig00000001_pilon_C.paspali	7596208	7596777
g2524.t1	Y(0.902)	-	Cytoplasmiceffector	ref|XP_016625351.1|	167	161	1	158	158	90	1	3	2.32e-38	hypothetical protein Z519_00343 [Cladophialophora bantiana CBS 173.52]	tig00000001_pilon_C.paspali	7596208	7596777
g2524.t1	Y(0.902)	-	Cytoplasmiceffector	ref|XP_022503470.1|	167	162	1	161	161	95	1	1	1.96e-39	hypothetical protein AYO20_02107 [Fonsecaea nubica]	tig00000001_pilon_C.paspali	7596208	7596777
g2524.t1	Y(0.902)	-	Cytoplasmiceffector	ref|XP_022516472.1|	167	161	1	161	161	92	1	2	1.43e-39	hypothetical protein AYO21_01010 [Fonsecaea monophora]	tig00000001_pilon_C.paspali	7596208	7596777
g2524.t1	Y(0.902)	-	Cytoplasmiceffector	ref|XP_023449716.1|	167	168	1	164	164	93	2	3	5.71e-39	hypothetical protein CB0940_06801 [Cercospora beticola]	tig00000001_pilon_C.paspali	7596208	7596777
g2570.t1	Y(0.917)	-	Cytoplasmiceffector	gb|ESZ98314.1|	116	117	1	115	117	21	1	2	1.43e-62	BolA-like protein [Sclerotinia borealis F-4128]	tig00000001_pilon_C.paspali	7709604	7710012
g2570.t1	Y(0.917)	-	Cytoplasmiceffector	gb|PQE15862.1|	116	115	1	115	115	11	0	0	4.89e-70	hypothetical protein CJF30_00006266 [Rutstroemia sp. NJR-2017a BBW]	tig00000001_pilon_C.paspali	7709604	7710012
g2570.t1	Y(0.917)	-	Cytoplasmiceffector	gb|PQE17991.1|	116	115	14	115	102	7	0	0	4.44e-63	hypothetical protein CJF31_00007824 [Rutstroemia sp. NJR-2017a BVV2]	tig00000001_pilon_C.paspali	7709604	7710012
g2570.t1	Y(0.917)	-	Cytoplasmiceffector	gb|PQE32518.1|	116	115	1	115	115	10	0	0	2.41e-71	hypothetical protein CJF32_00004091 [Rutstroemia sp. NJR-2017a WRK4]	tig00000001_pilon_C.paspali	7709604	7710012
g2570.t1	Y(0.917)	-	Cytoplasmiceffector	gb|TGO18889.1|	116	136	1	115	119	22	1	4	3.13e-59	hypothetical protein BTUL_0007g01080 [Botrytis tulipae]	tig00000001_pilon_C.paspali	7709604	7710012
g2570.t1	Y(0.917)	-	Cytoplasmiceffector	gb|TGO31228.1|	116	136	1	115	119	22	1	4	3.81e-59	hypothetical protein BPAE_0001g01240 [Botrytis paeoniae]	tig00000001_pilon_C.paspali	7709604	7710012
g2570.t1	Y(0.917)	-	Cytoplasmiceffector	gb|TGO41331.1|	116	136	1	115	119	21	1	4	6.51e-60	hypothetical protein BHYA_0023g00410 [Botrytis hyacinthi]	tig00000001_pilon_C.paspali	7709604	7710012
g2570.t1	Y(0.917)	-	Cytoplasmiceffector	gb|TGO64188.1|	116	136	1	115	119	23	1	4	9.99e-59	hypothetical protein BCON_0008g00350 [Botryotinia convoluta]	tig00000001_pilon_C.paspali	7709604	7710012
g2570.t1	Y(0.917)	-	Cytoplasmiceffector	gb|TGO79618.1|	116	136	1	115	119	23	1	4	9.15e-59	hypothetical protein BELL_0027g00090 [Botrytis elliptica]	tig00000001_pilon_C.paspali	7709604	7710012
g2570.t1	Y(0.917)	-	Cytoplasmiceffector	gb|TGO89428.1|	116	136	1	115	119	22	1	4	3.23e-59	hypothetical protein BPOR_0110g00120 [Botrytis porri]	tig00000001_pilon_C.paspali	7709604	7710012
g258.t1	Y(0.928)	-	Cytoplasmiceffector	ref|WP_023056558.1|	88	501	8	86	84	51	4	6	1.1	MreB/Mbl protein [Peptoniphilus sp. BV3C26]	tig00000001_pilon_C.paspali	707456	707722
g2596.t1	Y(0.9)	-	Cytoplasmiceffector	ref|WP_005447434.1|	163	394	7	149	146	79	7	23	5.3	serine hydrolase [Saccharomonospora azurea]	tig00000001_pilon_C.paspali	7769076	7769567
g2636.t1	Y(0.994)	-	Cytoplasmiceffector	emb|CZR62903.1|	198	200	1	198	200	28	1	2	7.6e-119	probable vacuolar protein-sorting-associated protein 46 [Phialocephala subalpina]	tig00000001_pilon_C.paspali	7858335	7859117
g2636.t1	Y(0.994)	-	Cytoplasmiceffector	gb|OWO98001.1|	198	200	1	198	200	25	1	2	9.99e-121	hypothetical protein B2J93_8226 [Marssonina coronariae]	tig00000001_pilon_C.paspali	7858335	7859117
g2636.t1	Y(0.994)	-	Cytoplasmiceffector	gb|PBP16637.1|	198	200	1	198	200	26	1	2	7.35e-120	hypothetical protein BUE80_DR012637 [Diplocarpon rosae]	tig00000001_pilon_C.paspali	7858335	7859117
g2636.t1	Y(0.994)	-	Cytoplasmiceffector	gb|PMD30861.1|	198	200	1	198	200	28	1	2	4.54e-119	hypothetical protein L207DRAFT_519967 [Hyaloscypha variabilis F]	tig00000001_pilon_C.paspali	7858335	7859117
g2636.t1	Y(0.994)	-	Cytoplasmiceffector	gb|PQE15813.1|	198	198	1	198	198	3	0	0	2.14e-139	putative vacuolar -sorting-associated 46 protein [Rutstroemia sp. NJR-2017a BBW]	tig00000001_pilon_C.paspali	7858335	7859117
g2636.t1	Y(0.994)	-	Cytoplasmiceffector	gb|PQE18027.1|	198	198	1	198	198	2	0	0	7.9e-140	putative vacuolar -sorting-associated 46 protein [Rutstroemia sp. NJR-2017a BVV2]	tig00000001_pilon_C.paspali	7858335	7859117
g2636.t1	Y(0.994)	-	Cytoplasmiceffector	gb|RDL41595.1|	198	200	1	198	200	27	1	2	1.64e-119	putative vacuolar protein-sorting-associated protein 46 [Phialophora cf. hyalina BP 5553]	tig00000001_pilon_C.paspali	7858335	7859117
g2636.t1	Y(0.994)	-	Cytoplasmiceffector	gb|RDW62161.1|	198	200	1	198	200	27	1	2	7.35e-120	putative vacuolar protein-sorting-associated protein 46 [Coleophoma cylindrospora]	tig00000001_pilon_C.paspali	7858335	7859117
g2636.t1	Y(0.994)	-	Cytoplasmiceffector	ref|XP_018063646.1|	198	200	1	198	200	27	1	2	2.46e-119	hypothetical protein LY89DRAFT_690340 [Phialocephala scopiformis]	tig00000001_pilon_C.paspali	7858335	7859117
g2636.t1	Y(0.994)	-	Cytoplasmiceffector	ref|XP_024740688.1|	198	200	1	198	200	27	1	2	4.96e-119	hypothetical protein K444DRAFT_609597 [Meliniomyces bicolor E]	tig00000001_pilon_C.paspali	7858335	7859117
g2658.t1	Y(0.902)	-	Cytoplasmiceffector	gb|MAS35626.1|	91	755	10	81	72	48	0	0	6.9	hypothetical protein [Anaerolineaceae bacterium]	tig00000001_pilon_C.paspali	7904749	7905024
g2658.t1	Y(0.902)	-	Cytoplasmiceffector	ref|WP_027473874.1|	91	1363	9	82	83	46	3	10	9.4	hybrid sensor histidine kinase/response regulator transcription factor [Saccharicrinis fermentans]	tig00000001_pilon_C.paspali	7904749	7905024
g2658.t1	Y(0.902)	-	Cytoplasmiceffector	ref|WP_042410426.1|	91	412	3	85	85	49	2	9	8.4	hypothetical protein [Corynebacterium jeddahense]	tig00000001_pilon_C.paspali	7904749	7905024
g2658.t1	Y(0.902)	-	Cytoplasmiceffector	ref|WP_081736084.1|	91	1385	9	82	83	46	3	10	9.4	hybrid sensor histidine kinase/response regulator transcription factor [Saccharicrinis fermentans]	tig00000001_pilon_C.paspali	7904749	7905024
g2667.t1	Y(0.922)	-	Cytoplasmiceffector	gb|AHI59350.1|	71	285	1	51	51	34	0	0	2.6	putative substilisin-like protease-like protein, partial [Amaranthus caudatus]	tig00000001_pilon_C.paspali	7932778	7932993
g2667.t1	Y(0.922)	-	Cytoplasmiceffector	gb|AHI59375.1|	71	285	1	51	51	34	0	0	2.6	putative substilisin-like protease-like protein, partial [Amaranthus quitensis]	tig00000001_pilon_C.paspali	7932778	7932993
g2667.t1	Y(0.922)	-	Cytoplasmiceffector	gb|KPV53932.1|	71	313	27	69	51	22	2	8	5.8	glycosyl transferase [Kouleothrix aurantiaca]	tig00000001_pilon_C.paspali	7932778	7932993
g2667.t1	Y(0.922)	-	Cytoplasmiceffector	gb|PYP94573.1|	71	377	4	31	28	13	0	0	5.4	hypothetical protein DMD34_08285 [Gemmatimonadetes bacterium]	tig00000001_pilon_C.paspali	7932778	7932993
g2667.t1	Y(0.922)	-	Cytoplasmiceffector	gb|ROP29133.1|	71	50	14	56	44	25	1	1	1.9	DUF2945 family protein [Couchioplanes caeruleus]	tig00000001_pilon_C.paspali	7932778	7932993
g2667.t1	Y(0.922)	-	Cytoplasmiceffector	ref|WP_126108788.1|	71	143	11	66	56	40	0	0	5.9	MerR family transcriptional regulator [Jeotgalibaca sp. H21T32]	tig00000001_pilon_C.paspali	7932778	7932993
g2700.t1	Y(0.903)	-	Cytoplasmiceffector	gb|ESZ96575.1|	126	126	1	126	126	9	0	0	1.52e-83	hypothetical protein SBOR_3077 [Sclerotinia borealis F-4128]	tig00000001_pilon_C.paspali	8021497	8021930
g2700.t1	Y(0.903)	-	Cytoplasmiceffector	gb|PMD14184.1|	126	125	1	125	125	19	1	2	1.56e-70	hypothetical protein NA56DRAFT_674413 [Pezoloma ericae]	tig00000001_pilon_C.paspali	8021497	8021930
g2700.t1	Y(0.903)	-	Cytoplasmiceffector	gb|PQE15753.1|	126	126	1	126	126	3	0	0	7.63e-87	cytochrome c oxidase assembly protein [Rutstroemia sp. NJR-2017a BBW]	tig00000001_pilon_C.paspali	8021497	8021930
g2700.t1	Y(0.903)	-	Cytoplasmiceffector	gb|PQE33653.1|	126	126	1	126	126	4	0	0	7.09e-86	cytochrome c oxidase assembly protein [Rutstroemia sp. NJR-2017a WRK4]	tig00000001_pilon_C.paspali	8021497	8021930
g2700.t1	Y(0.903)	-	Cytoplasmiceffector	gb|TGO13083.1|	126	126	1	126	126	10	0	0	9.2e-83	hypothetical protein BTUL_0077g00360 [Botrytis tulipae]	tig00000001_pilon_C.paspali	8021497	8021930
g2700.t1	Y(0.903)	-	Cytoplasmiceffector	gb|TGO54734.1|	126	126	1	126	126	11	0	0	9.85e-82	hypothetical protein BOTNAR_0260g00090 [Botryotinia narcissicola]	tig00000001_pilon_C.paspali	8021497	8021930
g2700.t1	Y(0.903)	-	Cytoplasmiceffector	gb|TGO90673.1|	126	126	1	126	126	8	0	0	4.75e-84	hypothetical protein BPOR_0055g00160 [Botrytis porri]	tig00000001_pilon_C.paspali	8021497	8021930
g2700.t1	Y(0.903)	-	Cytoplasmiceffector	ref|XP_001595231.1|	126	126	1	126	126	6	0	0	2.4e-85	hypothetical protein SS1G_03320 [Sclerotinia sclerotiorum 1980 UF-70]	tig00000001_pilon_C.paspali	8021497	8021930
g2700.t1	Y(0.903)	-	Cytoplasmiceffector	ref|XP_024550315.1|	126	126	1	126	126	9	0	0	1.23e-83	Bcpet191 [Botrytis cinerea B05.10]	tig00000001_pilon_C.paspali	8021497	8021930
g2700.t1	Y(0.903)	-	Cytoplasmiceffector	ref|XP_024740255.1|	126	125	1	125	125	21	1	2	4.23e-70	hypothetical protein K444DRAFT_641591 [Meliniomyces bicolor E]	tig00000001_pilon_C.paspali	8021497	8021930
g2710.t1	Y(0.907)	-	Cytoplasmiceffector	gb|ESZ92012.1|	90	322	1	49	49	26	0	0	5.26e-07	hypothetical protein SBOR_7604 [Sclerotinia borealis F-4128]	tig00000001_pilon_C.paspali	8047479	8047751
g2710.t1	Y(0.907)	-	Cytoplasmiceffector	gb|THV49120.1|	90	431	1	60	60	34	0	0	3.19e-10	hypothetical protein BGAL_0210g00040 [Botrytis galanthina]	tig00000001_pilon_C.paspali	8047479	8047751
g2710.t1	Y(0.907)	-	Cytoplasmiceffector	ref|WP_068061345.1|	90	162	13	53	46	24	1	5	4.7	2-amino-4-hydroxy-6-hydroxymethyldihydropteridine diphosphokinase [Rheinheimera sp. SA_1]	tig00000001_pilon_C.paspali	8047479	8047751
g2710.t1	Y(0.907)	-	Cytoplasmiceffector	ref|WP_070050418.1|	90	164	13	51	44	22	1	5	0.47	2-amino-4-hydroxy-6-hydroxymethyldihydropteridine diphosphokinase [Rheinheimera salexigens]	tig00000001_pilon_C.paspali	8047479	8047751
g2798.t1	Y(0.918)	-	Cytoplasmiceffector	dbj|GBP20610.1|	100	762	11	98	99	56	4	13	7.8	Glutathione hydrolase 6 [Eumeta japonica]	tig00000001_pilon_C.paspali	8315068	8315370
g2798.t1	Y(0.918)	-	Cytoplasmiceffector	gb|KKT90740.1|	100	2179	27	86	63	37	1	3	3.2	hypothetical protein UW92_C0028G0001, partial [Candidatus Jorgensenbacteria bacterium GW2011_GWA2_45_13]	tig00000001_pilon_C.paspali	8315068	8315370
g2798.t1	Y(0.918)	-	Cytoplasmiceffector	tpg|HBO96710.1|	100	1289	27	86	63	37	1	3	2.9	hypothetical protein [Candidatus Omnitrophica bacterium]	tig00000001_pilon_C.paspali	8315068	8315370
g2931.t1	Y(0.907)	-	Cytoplasmiceffector	gb|PQE14681.1|	205	205	1	205	205	11	0	0	1.63e-137	autophagy 16 protein [Rutstroemia sp. NJR-2017a BVV2]	tig00000001_pilon_C.paspali	8689119	8689803
g2931.t1	Y(0.907)	-	Cytoplasmiceffector	gb|PQE15579.1|	205	205	1	205	205	11	0	0	7.09e-137	autophagy 16 protein [Rutstroemia sp. NJR-2017a BBW]	tig00000001_pilon_C.paspali	8689119	8689803
g2931.t1	Y(0.907)	-	Cytoplasmiceffector	gb|PQE33449.1|	205	205	1	205	205	10	0	0	6.35e-138	autophagy 16 protein [Rutstroemia sp. NJR-2017a WRK4]	tig00000001_pilon_C.paspali	8689119	8689803
g2931.t1	Y(0.907)	-	Cytoplasmiceffector	gb|TEY76307.1|	205	210	1	205	210	51	1	5	4.39e-101	hypothetical protein BOTCAL_0060g00190 [Botryotinia calthae]	tig00000001_pilon_C.paspali	8689119	8689803
g2931.t1	Y(0.907)	-	Cytoplasmiceffector	gb|TGO26245.1|	205	210	1	205	210	52	1	5	5.53e-101	hypothetical protein BPAE_0063g00140 [Botrytis paeoniae]	tig00000001_pilon_C.paspali	8689119	8689803
g2931.t1	Y(0.907)	-	Cytoplasmiceffector	gb|TGO43497.1|	205	210	1	205	210	54	1	5	6.48e-99	hypothetical protein BHYA_0001g01290 [Botrytis hyacinthi]	tig00000001_pilon_C.paspali	8689119	8689803
g2931.t1	Y(0.907)	-	Cytoplasmiceffector	gb|TGO64006.1|	205	210	1	205	210	55	1	5	1.12e-98	hypothetical protein BCON_0009g00150 [Botryotinia convoluta]	tig00000001_pilon_C.paspali	8689119	8689803
g2931.t1	Y(0.907)	-	Cytoplasmiceffector	gb|TGO77832.1|	205	210	1	205	210	55	1	5	6.59e-101	hypothetical protein BELL_0089g00070 [Botrytis elliptica]	tig00000001_pilon_C.paspali	8689119	8689803
g2931.t1	Y(0.907)	-	Cytoplasmiceffector	gb|THV48862.1|	205	210	1	205	210	53	1	5	2.59e-100	hypothetical protein BGAL_0223g00040 [Botrytis galanthina]	tig00000001_pilon_C.paspali	8689119	8689803
g2931.t1	Y(0.907)	-	Cytoplasmiceffector	ref|XP_001554030.1|	205	210	1	205	210	52	1	5	1.01e-100	hypothetical protein BCIN_08g04190 [Botrytis cinerea B05.10]	tig00000001_pilon_C.paspali	8689119	8689803
g2950.t1	Y(0.908)	-	Cytoplasmiceffector	gb|PMD13047.1|	115	115	1	115	115	11	0	0	2.09e-72	hypothetical protein NA56DRAFT_447981 [Pezoloma ericae]	tig00000001_pilon_C.paspali	9039897	9040317
g2950.t1	Y(0.908)	-	Cytoplasmiceffector	gb|PMD30834.1|	115	115	1	115	115	9	0	0	2.81e-73	hypothetical protein L207DRAFT_443311 [Hyaloscypha variabilis F]	tig00000001_pilon_C.paspali	9039897	9040317
g2950.t1	Y(0.908)	-	Cytoplasmiceffector	gb|PQE07397.1|	115	115	1	115	115	10	0	0	2.52e-73	cytochrome c oxidase assembly COX16 protein [Rutstroemia sp. NJR-2017a WRK4]	tig00000001_pilon_C.paspali	9039897	9040317
g2950.t1	Y(0.908)	-	Cytoplasmiceffector	gb|TGO14466.1|	115	115	1	115	115	10	0	0	1.67e-71	hypothetical protein BTUL_0052g00030 [Botrytis tulipae]	tig00000001_pilon_C.paspali	9039897	9040317
g2950.t1	Y(0.908)	-	Cytoplasmiceffector	gb|TGO24093.1|	115	115	1	115	115	10	0	0	9.84e-72	hypothetical protein BPAE_0112g00120 [Botrytis paeoniae]	tig00000001_pilon_C.paspali	9039897	9040317
g2950.t1	Y(0.908)	-	Cytoplasmiceffector	gb|TGO57973.1|	115	114	1	113	113	9	0	0	2.79e-71	hypothetical protein BCON_0060g00470 [Botryotinia convoluta]	tig00000001_pilon_C.paspali	9039897	9040317
g2950.t1	Y(0.908)	-	Cytoplasmiceffector	ref|XP_001550157.1|	115	115	1	115	115	9	0	0	3.55e-72	Bccox16 [Botrytis cinerea B05.10]	tig00000001_pilon_C.paspali	9039897	9040317
g2950.t1	Y(0.908)	-	Cytoplasmiceffector	ref|XP_007295397.1|	115	115	1	115	115	8	0	0	1.45e-73	hypothetical protein MBM_07508 [Marssonina brunnea f. sp. 'multigermtubi' MB_m1]	tig00000001_pilon_C.paspali	9039897	9040317
g2950.t1	Y(0.908)	-	Cytoplasmiceffector	ref|XP_018063620.1|	115	115	1	115	115	12	0	0	2.29e-71	hypothetical protein LY89DRAFT_701352 [Phialocephala scopiformis]	tig00000001_pilon_C.paspali	9039897	9040317
g2950.t1	Y(0.908)	-	Cytoplasmiceffector	ref|XP_024740667.1|	115	115	1	115	115	11	0	0	1.61e-72	hypothetical protein K444DRAFT_584091 [Meliniomyces bicolor E]	tig00000001_pilon_C.paspali	9039897	9040317
g2992.t1	Y(0.917)	-	Cytoplasmiceffector	emb|CZR54177.1|	243	278	1	243	245	27	2	2	2.32e-152	probable H+-transporting two-sector ATPase chain b precursor [Phialocephala subalpina]	tig00000001_pilon_C.paspali	9132843	9133755
g2992.t1	Y(0.917)	-	Cytoplasmiceffector	gb|EHK99269.1|	243	245	1	243	245	28	1	2	2.47e-153	putative ATP synthase subunit 4, mitochondrial [Glarea lozoyensis 74030]	tig00000001_pilon_C.paspali	9132843	9133755
g2992.t1	Y(0.917)	-	Cytoplasmiceffector	gb|KIM97633.1|	243	244	1	243	244	35	1	1	6.99e-150	hypothetical protein OIDMADRAFT_20168 [Oidiodendron maius Zn]	tig00000001_pilon_C.paspali	9132843	9133755
g2992.t1	Y(0.917)	-	Cytoplasmiceffector	gb|PBP26189.1|	243	244	1	243	244	36	1	1	2.34e-149	hypothetical protein BUE80_DR002844 [Diplocarpon rosae]	tig00000001_pilon_C.paspali	9132843	9133755
g2992.t1	Y(0.917)	-	Cytoplasmiceffector	gb|PMD39046.1|	243	244	1	243	244	30	1	1	1.24e-153	putative ATP synthase subunit 4, mitochondrial [Hyaloscypha variabilis F]	tig00000001_pilon_C.paspali	9132843	9133755
g2992.t1	Y(0.917)	-	Cytoplasmiceffector	gb|PQE04094.1|	243	320	12	243	232	10	0	0	3.67e-151	ATP synthase subunit 4 protein [Rutstroemia sp. NJR-2017a BVV2]	tig00000001_pilon_C.paspali	9132843	9133755
g2992.t1	Y(0.917)	-	Cytoplasmiceffector	gb|PQE11559.1|	243	243	1	243	243	10	0	0	3.15e-160	ATP synthase subunit 4 protein [Rutstroemia sp. NJR-2017a WRK4]	tig00000001_pilon_C.paspali	9132843	9133755
g2992.t1	Y(0.917)	-	Cytoplasmiceffector	gb|PVH84239.1|	243	244	1	243	244	32	1	1	6.76e-153	hypothetical protein DL98DRAFT_485538 [Cadophora sp. DSE1049]	tig00000001_pilon_C.paspali	9132843	9133755
g2992.t1	Y(0.917)	-	Cytoplasmiceffector	ref|XP_008075945.1|	243	243	1	243	243	28	0	0	3.68e-155	ATP synthase subunit 4, mitochondrial precursor [Glarea lozoyensis ATCC 20868]	tig00000001_pilon_C.paspali	9132843	9133755
g2992.t1	Y(0.917)	-	Cytoplasmiceffector	ref|XP_024733448.1|	243	246	1	243	246	29	2	3	2.71e-151	putative ATP synthase subunit 4, mitochondrial [Meliniomyces bicolor E]	tig00000001_pilon_C.paspali	9132843	9133755
g3002.t1	Y(0.923)	-	Cytoplasmiceffector	gb|KCW53679.1|	79	1458	8	76	69	49	0	0	5.6	hypothetical protein EUGRSUZ_J02941 [Eucalyptus grandis]	tig00000001_pilon_C.paspali	9163647	9163886
g3002.t1	Y(0.923)	-	Cytoplasmiceffector	ref|XP_010033840.1|	79	1495	8	76	69	49	0	0	5.9	PREDICTED: ABC transporter G family member 29 isoform X1 [Eucalyptus grandis]	tig00000001_pilon_C.paspali	9163647	9163886
g3002.t1	Y(0.923)	-	Cytoplasmiceffector	ref|XP_010033841.1|	79	1410	8	76	69	49	0	0	6.5	PREDICTED: ABC transporter G family member 36 isoform X3 [Eucalyptus grandis]	tig00000001_pilon_C.paspali	9163647	9163886
g3002.t1	Y(0.923)	-	Cytoplasmiceffector	ref|XP_018719932.1|	79	1494	8	76	69	49	0	0	6.4	PREDICTED: ABC transporter G family member 29 isoform X2 [Eucalyptus grandis]	tig00000001_pilon_C.paspali	9163647	9163886
g300.t1	Y(0.927)	-	Cytoplasmiceffector	gb|ESZ90850.1|	78	77	1	76	76	10	0	0	1.89e-41	cytochrome c oxidase assembly protein [Sclerotinia borealis F-4128]	tig00000001_pilon_C.paspali	814536	814830
g300.t1	Y(0.927)	-	Cytoplasmiceffector	gb|PQE17793.1|	78	78	1	78	78	3	0	0	1.27e-47	cytochrome c oxidase assembly protein [Rutstroemia sp. NJR-2017a BVV2]	tig00000001_pilon_C.paspali	814536	814830
g300.t1	Y(0.927)	-	Cytoplasmiceffector	gb|PQE18282.1|	78	78	1	78	78	3	0	0	1.24e-47	cytochrome c oxidase assembly protein [Rutstroemia sp. NJR-2017a WRK4]	tig00000001_pilon_C.paspali	814536	814830
g300.t1	Y(0.927)	-	Cytoplasmiceffector	gb|PQE25354.1|	78	78	1	78	78	4	0	0	2.18e-46	cytochrome c oxidase assembly protein [Rutstroemia sp. NJR-2017a BBW]	tig00000001_pilon_C.paspali	814536	814830
g300.t1	Y(0.927)	-	Cytoplasmiceffector	gb|TGO08223.1|	78	77	1	74	74	9	0	0	4.25e-41	hypothetical protein BTUL_0220g00140 [Botrytis tulipae]	tig00000001_pilon_C.paspali	814536	814830
g300.t1	Y(0.927)	-	Cytoplasmiceffector	gb|TGO51356.1|	78	77	1	73	73	9	0	0	4.27e-40	hypothetical protein BOTNAR_0359g00060 [Botryotinia narcissicola]	tig00000001_pilon_C.paspali	814536	814830
g300.t1	Y(0.927)	-	Cytoplasmiceffector	gb|TGO60576.1|	78	77	1	74	74	10	0	0	1.85e-40	hypothetical protein BCON_0034g00120 [Botryotinia convoluta]	tig00000001_pilon_C.paspali	814536	814830
g300.t1	Y(0.927)	-	Cytoplasmiceffector	gb|TGO88919.1|	78	77	1	74	74	9	0	0	3.2e-41	hypothetical protein BPOR_0134g00060 [Botrytis porri]	tig00000001_pilon_C.paspali	814536	814830
g300.t1	Y(0.927)	-	Cytoplasmiceffector	ref|XP_001552821.1|	78	77	1	74	74	8	0	0	5.83e-42	hypothetical protein BCIN_14g01600 [Botrytis cinerea B05.10]	tig00000001_pilon_C.paspali	814536	814830
g300.t1	Y(0.927)	-	Cytoplasmiceffector	ref|XP_001598797.1|	78	77	1	76	76	8	0	0	1.09e-42	hypothetical protein SS1G_00886 [Sclerotinia sclerotiorum 1980 UF-70]	tig00000001_pilon_C.paspali	814536	814830
g3081.t1	Y(0.911)	-	Cytoplasmiceffector	gb|PQE03925.1|	305	538	36	297	301	81	3	46	8.22e-104	endo-14-beta-xylanase A protein [Rutstroemia sp. NJR-2017a BVV2]	tig00000001_pilon_C.paspali	9364878	9365850
g3081.t1	Y(0.911)	-	Cytoplasmiceffector	ref|WP_028471392.1|	305	195	156	235	91	50	3	16	3.6	TetR/AcrR family transcriptional regulator [Neptunomonas japonica]	tig00000001_pilon_C.paspali	9364878	9365850
g3081.t1	Y(0.911)	-	Cytoplasmiceffector	ref|WP_089731869.1|	305	204	85	192	113	73	2	12	1.7	translation initiation factor IF-2 subunit beta [Haloarchaeobius iranensis]	tig00000001_pilon_C.paspali	9364878	9365850
g3175.t1	Y(0.985)	-	Cytoplasmiceffector	gb|PQE03988.1|	99	69	1	69	69	12	0	0	5e-35	hypothetical protein CJF31_00001867 [Rutstroemia sp. NJR-2017a BVV2]	tig00000001_pilon_C.paspali	9577630	9577986
g3175.t1	Y(0.985)	-	Cytoplasmiceffector	gb|PQE11679.1|	99	89	1	99	99	12	1	10	2.1e-47	hypothetical protein CJF32_00004848 [Rutstroemia sp. NJR-2017a WRK4]	tig00000001_pilon_C.paspali	9577630	9577986
g3175.t1	Y(0.985)	-	Cytoplasmiceffector	gb|TEY82964.1|	99	89	1	97	98	25	3	12	5.11e-34	hypothetical protein BOTCAL_0026g00270 [Botryotinia calthae]	tig00000001_pilon_C.paspali	9577630	9577986
g3175.t1	Y(0.985)	-	Cytoplasmiceffector	gb|TGO18083.1|	99	86	5	97	94	20	3	12	1.07e-34	hypothetical protein BTUL_0012g00270 [Botrytis tulipae]	tig00000001_pilon_C.paspali	9577630	9577986
g3175.t1	Y(0.985)	-	Cytoplasmiceffector	gb|TGO42644.1|	99	86	5	97	94	21	3	12	2.89e-34	hypothetical protein BHYA_0006g00460 [Botrytis hyacinthi]	tig00000001_pilon_C.paspali	9577630	9577986
g3175.t1	Y(0.985)	-	Cytoplasmiceffector	gb|TGO63000.1|	99	89	1	97	98	23	3	12	3.68e-35	hypothetical protein BCON_0016g00930 [Botryotinia convoluta]	tig00000001_pilon_C.paspali	9577630	9577986
g3175.t1	Y(0.985)	-	Cytoplasmiceffector	gb|TGO80552.1|	99	89	1	98	99	25	3	12	1.34e-34	hypothetical protein BELL_0005g00350 [Botrytis elliptica]	tig00000001_pilon_C.paspali	9577630	9577986
g3175.t1	Y(0.985)	-	Cytoplasmiceffector	gb|THV52426.1|	99	89	1	97	98	22	3	12	7.58e-36	hypothetical protein BGAL_0079g00120 [Botrytis galanthina]	tig00000001_pilon_C.paspali	9577630	9577986
g3175.t1	Y(0.985)	-	Cytoplasmiceffector	ref|XP_001548357.1|	99	89	1	98	99	24	3	12	1.99e-35	hypothetical protein BCIN_01g04930 [Botrytis cinerea B05.10]	tig00000001_pilon_C.paspali	9577630	9577986
g3175.t1	Y(0.985)	-	Cytoplasmiceffector	ref|XP_001594569.1|	99	86	5	97	94	18	3	12	3.48e-35	predicted protein [Sclerotinia sclerotiorum 1980 UF-70]	tig00000001_pilon_C.paspali	9577630	9577986
g3201.t1	Y(0.987)	-	Cytoplasmiceffector	gb|KPA37348.1|	111	1070	5	106	115	58	5	22	1.2	ring-13 protein [Fusarium langsethiae]	tig00000001_pilon_C.paspali	9644973	9645308
g3201.t1	Y(0.987)	-	Cytoplasmiceffector	gb|PZC80727.1|	111	202	3	106	110	75	2	6	0.35	hypothetical protein B5X24_HaOG213951 [Helicoverpa armigera]	tig00000001_pilon_C.paspali	9644973	9645308
g3201.t1	Y(0.987)	-	Cytoplasmiceffector	gb|RGP67884.1|	111	1131	5	106	115	58	5	22	3.3	DNA repair rad16 [Fusarium sporotrichioides]	tig00000001_pilon_C.paspali	9644973	9645308
g3201.t1	Y(0.987)	-	Cytoplasmiceffector	ref|XP_028914388.1|	111	276	2	105	104	82	0	0	5.3	zinc finger protein 2-like isoform X1 [Ornithorhynchus anatinus]	tig00000001_pilon_C.paspali	9644973	9645308
g3201.t1	Y(0.987)	-	Cytoplasmiceffector	ref|XP_028914389.1|	111	274	2	105	104	82	0	0	5.6	zinc finger protein 2-like isoform X2 [Ornithorhynchus anatinus]	tig00000001_pilon_C.paspali	9644973	9645308
g3379.t1	Y(0.92)	-	Cytoplasmiceffector	emb|CZR55130.1|	75	75	1	75	75	12	0	0	2.1e-40	probable DNA-directed RNA polymerase II chain RPB10 [Phialocephala subalpina]	tig00000002_pilon_C.paspali	4224	4651
g3379.t1	Y(0.92)	-	Cytoplasmiceffector	gb|APA09899.1|	75	76	1	75	75	7	0	0	5.27e-45	hypothetical protein sscle_05g046690 [Sclerotinia sclerotiorum 1980 UF-70]	tig00000002_pilon_C.paspali	4224	4651
g3379.t1	Y(0.92)	-	Cytoplasmiceffector	gb|EPQ63395.1|	75	75	1	75	75	12	0	0	2.92e-40	RNA polymerase subunit ABC10-beta [Blumeria graminis f. sp. tritici 96224]	tig00000002_pilon_C.paspali	4224	4651
g3379.t1	Y(0.92)	-	Cytoplasmiceffector	gb|ESZ98770.1|	75	76	1	75	75	9	0	0	5.59e-44	DNA-directed RNA polymerase N/8 kDa subunit [Sclerotinia borealis F-4128]	tig00000002_pilon_C.paspali	4224	4651
g3379.t1	Y(0.92)	-	Cytoplasmiceffector	gb|KIM98094.1|	75	75	1	74	74	12	0	0	1.24e-40	hypothetical protein OIDMADRAFT_20390 [Oidiodendron maius Zn]	tig00000002_pilon_C.paspali	4224	4651
g3379.t1	Y(0.92)	-	Cytoplasmiceffector	gb|PMD12738.1|	75	75	1	75	75	13	0	0	2.47e-40	putative DNA-directed RNA polymerases I, II, and III subunit RPABC5 [Pezoloma ericae]	tig00000002_pilon_C.paspali	4224	4651
g3379.t1	Y(0.92)	-	Cytoplasmiceffector	gb|PMD38436.1|	75	75	1	75	75	13	0	0	1.74e-40	putative DNA-directed RNA polymerases I, II, and III subunit RPABC5 [Hyaloscypha variabilis F]	tig00000002_pilon_C.paspali	4224	4651
g3379.t1	Y(0.92)	-	Cytoplasmiceffector	gb|RDL33081.1|	75	75	1	75	75	12	0	0	7.31e-41	Uncharacterized protein BP5553_08520 [Phialophora cf. hyalina BP 5553]	tig00000002_pilon_C.paspali	4224	4651
g3379.t1	Y(0.92)	-	Cytoplasmiceffector	ref|XP_001560085.1|	75	76	1	75	75	7	0	0	7.41e-45	Bcrpb10 [Botrytis cinerea B05.10]	tig00000002_pilon_C.paspali	4224	4651
g3379.t1	Y(0.92)	-	Cytoplasmiceffector	ref|XP_024738579.1|	75	75	1	75	75	12	0	0	3.07e-41	putative DNA-directed RNA polymerases I, II, and III subunit RPABC5 [Meliniomyces bicolor E]	tig00000002_pilon_C.paspali	4224	4651
g338.t1	Y(0.958)	-	Cytoplasmiceffector	gb|PQE24525.1|	153	161	1	146	146	0	0	0	2.13e-102	clathrin coat assembly ap19 protein [Rutstroemia sp. NJR-2017a WRK4]	tig00000001_pilon_C.paspali	926517	927225
g338.t1	Y(0.958)	-	Cytoplasmiceffector	gb|PQE25515.1|	153	161	1	146	146	0	0	0	1.62e-102	clathrin coat assembly ap19 protein [Rutstroemia sp. NJR-2017a BBW]	tig00000001_pilon_C.paspali	926517	927225
g338.t1	Y(0.958)	-	Cytoplasmiceffector	gb|RDL39180.1|	153	155	1	147	147	3	0	0	1.29e-101	putative clathrin-associated adaptor complex ap-1 small chain sigma1 [Phialophora cf. hyalina BP 5553]	tig00000001_pilon_C.paspali	926517	927225
g338.t1	Y(0.958)	-	Cytoplasmiceffector	gb|TGO17240.1|	153	159	1	147	147	2	0	0	5.89e-102	hypothetical protein BTUL_0019g00300 [Botrytis tulipae]	tig00000001_pilon_C.paspali	926517	927225
g338.t1	Y(0.958)	-	Cytoplasmiceffector	gb|TGO30813.1|	153	159	1	147	147	2	0	0	5.05e-102	hypothetical protein BPAE_0003g00980 [Botrytis paeoniae]	tig00000001_pilon_C.paspali	926517	927225
g338.t1	Y(0.958)	-	Cytoplasmiceffector	gb|TGO49600.1|	153	161	1	146	146	2	0	0	2.6e-101	hypothetical protein BOTNAR_0425g00040 [Botryotinia narcissicola]	tig00000001_pilon_C.paspali	926517	927225
g338.t1	Y(0.958)	-	Cytoplasmiceffector	ref|XP_001553102.1|	153	155	1	147	147	2	0	0	5.98e-102	Bcaps1 [Botrytis cinerea B05.10]	tig00000001_pilon_C.paspali	926517	927225
g338.t1	Y(0.958)	-	Cytoplasmiceffector	ref|XP_018067665.1|	153	155	1	147	147	1	0	0	9.68e-103	Adaptor protein complex sigma subunit [Phialocephala scopiformis]	tig00000001_pilon_C.paspali	926517	927225
g338.t1	Y(0.958)	-	Cytoplasmiceffector	ref|XP_024552876.1|	153	161	1	149	149	5	0	0	1.91e-101	Bcaps1 [Botrytis cinerea B05.10]	tig00000001_pilon_C.paspali	926517	927225
g338.t1	Y(0.958)	-	Cytoplasmiceffector	ref|XP_024552877.1|	153	155	1	153	154	4	1	1	5e-104	Bcaps1 [Botrytis cinerea B05.10]	tig00000001_pilon_C.paspali	926517	927225
g3406.t1	Y(0.935)	-	Cytoplasmiceffector	gb|EGD50233.1|	189	107	41	107	71	49	1	4	0.92	integrase [Thermoanaerobacter ethanolicus JW 200]	tig00000002_pilon_C.paspali	74117	74817
g3406.t1	Y(0.935)	-	Cytoplasmiceffector	gb|EGD50721.1|	189	124	41	121	85	56	2	7	0.076	hypothetical protein TheetDRAFT_2478 [Thermoanaerobacter ethanolicus JW 200]	tig00000002_pilon_C.paspali	74117	74817
g3406.t1	Y(0.935)	-	Cytoplasmiceffector	gb|KJX98988.1|	189	721	86	177	97	56	3	11	6	hypothetical protein TI39_contig379g00011 [Zymoseptoria brevis]	tig00000002_pilon_C.paspali	74117	74817
g3406.t1	Y(0.935)	-	Cytoplasmiceffector	ref|WP_012102130.1|	189	379	41	105	69	47	1	4	6.3	transposase [Clostridium kluyveri]	tig00000002_pilon_C.paspali	74117	74817
g347.t1	Y(0.928)	-	Cytoplasmiceffector	ref|WP_135798654.1|	105	279	16	105	95	57	3	8	1.4	hydrolase [Weissella confusa]	tig00000001_pilon_C.paspali	942887	943204
g3493.t1	Y(0.96)	-	Cytoplasmiceffector	gb|KFY43846.1|	86	1286	5	69	65	39	0	0	1.23e-07	hypothetical protein V494_01783 [Pseudogymnoascus sp. VKM F-4513 (FW-928)]	tig00000002_pilon_C.paspali	305127	305387
g3493.t1	Y(0.96)	-	Cytoplasmiceffector	gb|KIM97205.1|	86	707	8	63	56	31	0	0	1.71e-08	hypothetical protein OIDMADRAFT_57839 [Oidiodendron maius Zn]	tig00000002_pilon_C.paspali	305127	305387
g3493.t1	Y(0.96)	-	Cytoplasmiceffector	gb|PMD33366.1|	86	638	10	67	58	31	1	1	9.27e-09	HET-domain-containing protein [Hyaloscypha variabilis F]	tig00000002_pilon_C.paspali	305127	305387
g3493.t1	Y(0.96)	-	Cytoplasmiceffector	gb|RBR19540.1|	86	1145	12	67	56	31	0	0	2.6e-07	hypothetical protein FIESC28_05535 [Fusarium sp. FIESC_28]	tig00000002_pilon_C.paspali	305127	305387
g3493.t1	Y(0.96)	-	Cytoplasmiceffector	gb|RFN52333.1|	86	1056	7	67	61	36	0	0	2.59e-07	het-domain-containing protein [Fusarium sp. FIESC_12]	tig00000002_pilon_C.paspali	305127	305387
g3493.t1	Y(0.96)	-	Cytoplasmiceffector	gb|RGP62657.1|	86	1014	7	84	78	49	0	0	2.19e-07	het-domain-containing protein [Fusarium sporotrichioides]	tig00000002_pilon_C.paspali	305127	305387
g3493.t1	Y(0.96)	-	Cytoplasmiceffector	gb|RGP78690.1|	86	1246	6	73	70	38	1	2	5.26e-10	heterokaryon incompatibility [Fusarium longipes]	tig00000002_pilon_C.paspali	305127	305387
g3493.t1	Y(0.96)	-	Cytoplasmiceffector	ref|XP_007786276.1|	86	992	5	86	82	47	2	5	9.38e-10	hypothetical protein EPUS_06974 [Endocarpon pusillum Z07020]	tig00000002_pilon_C.paspali	305127	305387
g3493.t1	Y(0.96)	-	Cytoplasmiceffector	ref|XP_009226005.1|	86	1062	7	66	60	36	0	0	9.96e-08	hypothetical protein GGTG_09882 [Gaeumannomyces tritici R3-111a-1]	tig00000002_pilon_C.paspali	305127	305387
g3493.t1	Y(0.96)	-	Cytoplasmiceffector	ref|XP_024729668.1|	86	635	7	67	61	35	1	1	1.24e-07	HET-domain-containing protein, partial [Meliniomyces bicolor E]	tig00000002_pilon_C.paspali	305127	305387
g3521.t1	Y(0.97)	-	Cytoplasmiceffector	gb|MAX12760.1|	86	139	28	86	65	34	3	9	1.7	hypothetical protein [Candidatus Marinimicrobia bacterium]	tig00000002_pilon_C.paspali	373500	373760
g3521.t1	Y(0.97)	-	Cytoplasmiceffector	ref|WP_057771424.1|	86	116	35	76	42	28	0	0	7.4	anti-sigma F factor antagonist [Bacillus sp. FJAT-25496]	tig00000002_pilon_C.paspali	373500	373760
g3521.t1	Y(0.97)	-	Cytoplasmiceffector	tpg|HBI58586.1|	86	807	2	84	89	46	2	16	1.3	hypothetical protein [Porphyromonadaceae bacterium]	tig00000002_pilon_C.paspali	373500	373760
g3619.t1	Y(0.95)	-	Cytoplasmiceffector	gb|APA13260.1|	205	207	5	205	201	44	0	0	8.67e-115	hypothetical protein sscle_10g080300 [Sclerotinia sclerotiorum 1980 UF-70]	tig00000002_pilon_C.paspali	669990	670955
g3619.t1	Y(0.95)	-	Cytoplasmiceffector	gb|PQE22462.1|	205	214	1	205	205	34	0	0	1.13e-129	glycolipid transfer het-c2 protein [Rutstroemia sp. NJR-2017a BVV2]	tig00000002_pilon_C.paspali	669990	670955
g3619.t1	Y(0.95)	-	Cytoplasmiceffector	gb|TEY52077.1|	205	207	5	205	201	47	0	0	1.06e-113	hypothetical protein BOTCAL_0260g00130 [Botryotinia calthae]	tig00000002_pilon_C.paspali	669990	670955
g3619.t1	Y(0.95)	-	Cytoplasmiceffector	gb|TGO13157.1|	205	207	5	205	201	44	0	0	2.63e-115	hypothetical protein BTUL_0075g00020 [Botrytis tulipae]	tig00000002_pilon_C.paspali	669990	670955
g3619.t1	Y(0.95)	-	Cytoplasmiceffector	gb|TGO18056.1|	205	207	5	205	201	43	0	0	2.46e-116	hypothetical protein BPAE_0396g00060 [Botrytis paeoniae]	tig00000002_pilon_C.paspali	669990	670955
g3619.t1	Y(0.95)	-	Cytoplasmiceffector	gb|TGO45291.1|	205	207	5	205	201	44	0	0	1.26e-115	hypothetical protein BCON_0405g00100 [Botryotinia convoluta]	tig00000002_pilon_C.paspali	669990	670955
g3619.t1	Y(0.95)	-	Cytoplasmiceffector	gb|TGO77649.1|	205	207	5	205	201	44	0	0	1.41e-115	hypothetical protein BELL_0097g00210 [Botrytis elliptica]	tig00000002_pilon_C.paspali	669990	670955
g3619.t1	Y(0.95)	-	Cytoplasmiceffector	gb|TGO82166.1|	205	207	5	205	201	44	0	0	2.74e-115	hypothetical protein BPOR_0901g00010 [Botrytis porri]	tig00000002_pilon_C.paspali	669990	670955
g3619.t1	Y(0.95)	-	Cytoplasmiceffector	gb|THV48493.1|	205	207	5	205	201	46	0	0	2.9e-114	hypothetical protein BGAL_0245g00160 [Botrytis galanthina]	tig00000002_pilon_C.paspali	669990	670955
g3619.t1	Y(0.95)	-	Cytoplasmiceffector	ref|XP_024552311.1|	205	207	5	205	201	47	0	0	2.54e-113	hypothetical protein BCIN_12g05330 [Botrytis cinerea B05.10]	tig00000002_pilon_C.paspali	669990	670955
g3628.t1	Y(0.903)	-	Cytoplasmiceffector	emb|CZR63257.1|	191	188	6	188	183	44	1	5	4.06e-90	related to acetyltransferase [Phialocephala subalpina]	tig00000002_pilon_C.paspali	690389	691018
g3628.t1	Y(0.903)	-	Cytoplasmiceffector	gb|APA12770.1|	191	192	1	188	191	49	2	3	3.47e-92	hypothetical protein sscle_10g075400 [Sclerotinia sclerotiorum 1980 UF-70]	tig00000002_pilon_C.paspali	690389	691018
g3628.t1	Y(0.903)	-	Cytoplasmiceffector	gb|PQE20548.1|	191	191	1	191	191	16	0	0	3.63e-127	N-acetyltransferase ats1 protein [Rutstroemia sp. NJR-2017a BBW]	tig00000002_pilon_C.paspali	690389	691018
g3628.t1	Y(0.903)	-	Cytoplasmiceffector	gb|PQE22474.1|	191	194	9	191	183	19	0	0	2.74e-118	N-acetyltransferase ats1 protein [Rutstroemia sp. NJR-2017a BVV2]	tig00000002_pilon_C.paspali	690389	691018
g3628.t1	Y(0.903)	-	Cytoplasmiceffector	gb|PQE28770.1|	191	191	1	191	191	15	0	0	1.51e-127	N-acetyltransferase ats1 protein [Rutstroemia sp. NJR-2017a WRK4]	tig00000002_pilon_C.paspali	690389	691018
g3628.t1	Y(0.903)	-	Cytoplasmiceffector	gb|TGO24619.1|	191	194	1	189	194	52	2	5	3.54e-90	hypothetical protein BPAE_0098g00080 [Botrytis paeoniae]	tig00000002_pilon_C.paspali	690389	691018
g3628.t1	Y(0.903)	-	Cytoplasmiceffector	gb|TGO31994.1|	191	195	1	189	195	47	2	6	8e-91	hypothetical protein BHYA_0369g00010 [Botrytis hyacinthi]	tig00000002_pilon_C.paspali	690389	691018
g3628.t1	Y(0.903)	-	Cytoplasmiceffector	gb|TGO49191.1|	191	213	6	189	195	44	2	11	1.78e-90	hypothetical protein BOTNAR_0440g00040 [Botryotinia narcissicola]	tig00000002_pilon_C.paspali	690389	691018
g3628.t1	Y(0.903)	-	Cytoplasmiceffector	ref|XP_018061349.1|	191	188	6	188	183	39	1	5	8.99e-94	GCN5-related N-acetyltransferas-like protein [Phialocephala scopiformis]	tig00000002_pilon_C.paspali	690389	691018
g3628.t1	Y(0.903)	-	Cytoplasmiceffector	ref|XP_024720269.1|	191	185	6	188	183	45	1	5	5.46e-93	hypothetical protein M430DRAFT_141123 [Amorphotheca resinae ATCC 22711]	tig00000002_pilon_C.paspali	690389	691018
g3640.t1	Y(0.922)	-	Cytoplasmiceffector	emb|CZR52134.1|	194	1391	1	179	201	66	3	29	1.4e-48	related to vegetatible incompatibility protein HET-E-1 [Phialocephala subalpina]	tig00000002_pilon_C.paspali	719220	719804
g3640.t1	Y(0.922)	-	Cytoplasmiceffector	emb|CZR55945.1|	194	1400	1	182	201	60	2	26	1.82e-56	related to vegetatible incompatibility protein HET-E-1 [Phialocephala subalpina]	tig00000002_pilon_C.paspali	719220	719804
g3640.t1	Y(0.922)	-	Cytoplasmiceffector	gb|KFX89568.1|	194	1179	1	192	214	68	3	29	1.1e-58	hypothetical protein O988_08587 [Pseudogymnoascus sp. VKM F-3808]	tig00000002_pilon_C.paspali	719220	719804
g3640.t1	Y(0.922)	-	Cytoplasmiceffector	gb|KFY11687.1|	194	752	1	190	212	74	3	29	7.01e-53	hypothetical protein V491_07098 [Pseudogymnoascus sp. VKM F-3775]	tig00000002_pilon_C.paspali	719220	719804
g3640.t1	Y(0.922)	-	Cytoplasmiceffector	gb|KFY27130.1|	194	1116	1	192	214	68	3	29	7.74e-59	hypothetical protein V491_01015 [Pseudogymnoascus sp. VKM F-3775]	tig00000002_pilon_C.paspali	719220	719804
g3640.t1	Y(0.922)	-	Cytoplasmiceffector	gb|KFY79958.1|	194	1174	1	192	216	77	4	31	1.52e-48	hypothetical protein V499_01121 [Pseudogymnoascus sp. VKM F-103]	tig00000002_pilon_C.paspali	719220	719804
g3640.t1	Y(0.922)	-	Cytoplasmiceffector	gb|KFZ13480.1|	194	869	1	192	216	77	4	31	8.49e-48	hypothetical protein V501_03681, partial [Pseudogymnoascus sp. VKM F-4519 (FW-2642)]	tig00000002_pilon_C.paspali	719220	719804
g3640.t1	Y(0.922)	-	Cytoplasmiceffector	gb|KFZ24680.1|	194	999	1	190	212	66	3	29	2.83e-58	hypothetical protein V502_00841, partial [Pseudogymnoascus sp. VKM F-4520 (FW-2644)]	tig00000002_pilon_C.paspali	719220	719804
g3640.t1	Y(0.922)	-	Cytoplasmiceffector	gb|OBT51773.1|	194	829	1	192	214	69	3	29	1.01e-58	hypothetical protein VE04_08921, partial [Pseudogymnoascus sp. 24MN13]	tig00000002_pilon_C.paspali	719220	719804
g3640.t1	Y(0.922)	-	Cytoplasmiceffector	gb|PVH70824.1|	194	1191	1	194	213	26	2	26	4.99e-84	WD40 repeat-like protein [Cadophora sp. DSE1049]	tig00000002_pilon_C.paspali	719220	719804
g3642.t1	Y(0.952)	-	Cytoplasmiceffector	gb|KIM93071.1|	138	716	2	138	137	40	0	0	1.03e-60	hypothetical protein OIDMADRAFT_184872 [Oidiodendron maius Zn]	tig00000002_pilon_C.paspali	720360	720776
g3642.t1	Y(0.952)	-	Cytoplasmiceffector	gb|OCK74462.1|	138	865	2	138	137	35	0	0	9.81e-64	HET-domain-containing protein, partial [Lepidopterella palustris CBS 459.81]	tig00000002_pilon_C.paspali	720360	720776
g3642.t1	Y(0.952)	-	Cytoplasmiceffector	gb|OCK75794.1|	138	239	2	138	137	44	0	0	4.92e-62	beta transducin-like protein HET-D2Y [Lepidopterella palustris CBS 459.81]	tig00000002_pilon_C.paspali	720360	720776
g3642.t1	Y(0.952)	-	Cytoplasmiceffector	gb|OCK89456.1|	138	1317	2	138	137	27	1	1	3.69e-66	WD40 repeat-like protein [Cenococcum geophilum 1.58]	tig00000002_pilon_C.paspali	720360	720776
g3642.t1	Y(0.952)	-	Cytoplasmiceffector	gb|PVH69914.1|	138	803	2	138	137	35	0	0	1.52e-62	HET-domain-containing protein [Cadophora sp. DSE1049]	tig00000002_pilon_C.paspali	720360	720776
g3642.t1	Y(0.952)	-	Cytoplasmiceffector	gb|PVH90269.1|	138	534	2	138	137	43	0	0	2.81e-61	NACHT-domain-containing protein, partial [Periconia macrospinosa]	tig00000002_pilon_C.paspali	720360	720776
g3642.t1	Y(0.952)	-	Cytoplasmiceffector	gb|PVH90664.1|	138	820	2	138	137	38	0	0	2.19e-61	hypothetical protein DM02DRAFT_547357, partial [Periconia macrospinosa]	tig00000002_pilon_C.paspali	720360	720776
g3642.t1	Y(0.952)	-	Cytoplasmiceffector	gb|RYP70100.1|	138	1376	2	138	137	40	0	0	1.07e-60	hypothetical protein DL769_005077 [Monosporascus sp. CRB-8-3]	tig00000002_pilon_C.paspali	720360	720776
g3642.t1	Y(0.952)	-	Cytoplasmiceffector	ref|XP_007786937.1|	138	1049	2	138	137	35	0	0	2.32e-62	Vegetative incompatibility protein HET-E-1 [Endocarpon pusillum Z07020]	tig00000002_pilon_C.paspali	720360	720776
g3642.t1	Y(0.952)	-	Cytoplasmiceffector	ref|XP_007806010.1|	138	1388	2	138	137	40	0	0	3.28e-61	hypothetical protein EPUS_06803 [Endocarpon pusillum Z07020]	tig00000002_pilon_C.paspali	720360	720776
g3680.t1	Y(0.953)	-	Cytoplasmiceffector	gb|MBT96714.1|	136	247	34	79	50	23	3	4	4.7	hypothetical protein [Candidatus Pacearchaeota archaeon]	tig00000003_pilon_C.paspali	333789	334199
g3680.t1	Y(0.953)	-	Cytoplasmiceffector	gb|ORY67738.1|	136	198	2	111	120	72	1	10	4.88e-10	hypothetical protein BCR38DRAFT_483345 [Pseudomassariella vexata]	tig00000003_pilon_C.paspali	333789	334199
g3680.t1	Y(0.953)	-	Cytoplasmiceffector	gb|PIZ76792.1|	136	264	43	116	75	44	3	9	3.7	hypothetical protein COY05_00075 [Candidatus Peregrinibacteria bacterium CG_4_10_14_0_2_um_filter_38_24]	tig00000003_pilon_C.paspali	333789	334199
g3680.t1	Y(0.953)	-	Cytoplasmiceffector	gb|RDI85503.1|	136	116	5	101	108	65	1	11	9.55e-06	hypothetical protein Vi05172_g4321 [Venturia inaequalis]	tig00000003_pilon_C.paspali	333789	334199
g3680.t1	Y(0.953)	-	Cytoplasmiceffector	gb|RVD84210.1|	136	393	50	129	91	54	2	11	1.6	hypothetical protein DFL_005972 [Duddingtonia flagrans]	tig00000003_pilon_C.paspali	333789	334199
g3680.t1	Y(0.953)	-	Cytoplasmiceffector	ref|WP_109160554.1|	136	266	13	92	80	53	2	3	5.5	CRISPR-associated protein Cas5 [Desulfurococcaceae archaeon AG1]	tig00000003_pilon_C.paspali	333789	334199
g3822.t1	Y(0.946)	-	Cytoplasmiceffector	ref|WP_120650569.1|	81	577	27	68	42	22	1	1	9.4	ABC transporter ATP-binding protein [Pseudomonas sp. DY-1]	tig00000003_pilon_C.paspali	802738	802983
g3822.t1	Y(0.946)	-	Cytoplasmiceffector	ref|WP_121663471.1|	81	213	16	75	60	43	0	0	6.3	hypothetical protein [Bacillus litoralis]	tig00000003_pilon_C.paspali	802738	802983
g3902.t1	Y(0.903)	-	Cytoplasmiceffector	gb|PQE06374.1|	234	229	1	229	229	22	0	0	5.24e-148	Centromere Cenp-H protein [Rutstroemia sp. NJR-2017a WRK4]	tig00000003_pilon_C.paspali	1008255	1009060
g3902.t1	Y(0.903)	-	Cytoplasmiceffector	gb|PQE11162.1|	234	234	1	229	229	23	0	0	6.63e-149	Centromere Cenp-H protein [Rutstroemia sp. NJR-2017a BVV2]	tig00000003_pilon_C.paspali	1008255	1009060
g3902.t1	Y(0.903)	-	Cytoplasmiceffector	gb|PQE25802.1|	234	241	1	229	241	24	1	12	7.01e-143	Centromere Cenp-H protein [Rutstroemia sp. NJR-2017a BBW]	tig00000003_pilon_C.paspali	1008255	1009060
g3902.t1	Y(0.903)	-	Cytoplasmiceffector	gb|RAL65088.1|	234	238	1	227	228	72	1	1	2.88e-107	hypothetical protein DID88_001195 [Monilinia fructigena]	tig00000003_pilon_C.paspali	1008255	1009060
g3902.t1	Y(0.903)	-	Cytoplasmiceffector	gb|TGO09672.1|	234	238	1	227	228	79	1	1	9.58e-104	hypothetical protein BTUL_0157g00090 [Botrytis tulipae]	tig00000003_pilon_C.paspali	1008255	1009060
g3902.t1	Y(0.903)	-	Cytoplasmiceffector	gb|TGO24216.1|	234	237	1	227	227	80	0	0	1.24e-104	hypothetical protein BPAE_0108g00090 [Botrytis paeoniae]	tig00000003_pilon_C.paspali	1008255	1009060
g3902.t1	Y(0.903)	-	Cytoplasmiceffector	gb|TGO55241.1|	234	238	1	227	228	78	1	1	2.21e-104	hypothetical protein BOTNAR_0249g00140 [Botryotinia narcissicola]	tig00000003_pilon_C.paspali	1008255	1009060
g3902.t1	Y(0.903)	-	Cytoplasmiceffector	gb|TGO71475.1|	234	237	1	227	227	80	0	0	9.93e-105	hypothetical protein BELL_0570g00010 [Botrytis elliptica]	tig00000003_pilon_C.paspali	1008255	1009060
g3902.t1	Y(0.903)	-	Cytoplasmiceffector	gb|THV45967.1|	234	238	1	227	228	80	1	1	3.37e-103	hypothetical protein BGAL_0431g00050 [Botrytis galanthina]	tig00000003_pilon_C.paspali	1008255	1009060
g3902.t1	Y(0.903)	-	Cytoplasmiceffector	ref|XP_001597000.1|	234	232	1	227	228	75	1	1	9.16e-106	hypothetical protein SS1G_01193 [Sclerotinia sclerotiorum 1980 UF-70]	tig00000003_pilon_C.paspali	1008255	1009060
g3925.t1	Y(0.901)	-	Cytoplasmiceffector	gb|ESZ91864.1|	199	200	1	199	200	31	1	1	6.72e-115	60S ribosomal protein L6 [Sclerotinia borealis F-4128]	tig00000003_pilon_C.paspali	1087112	1087979
g3925.t1	Y(0.901)	-	Cytoplasmiceffector	gb|KIN01943.1|	199	201	1	199	201	52	1	2	4.35e-101	hypothetical protein OIDMADRAFT_41148 [Oidiodendron maius Zn]	tig00000003_pilon_C.paspali	1087112	1087979
g3925.t1	Y(0.901)	-	Cytoplasmiceffector	gb|PQE06384.1|	199	199	1	199	199	4	0	0	2.1e-137	60S ribosomal L6 protein [Rutstroemia sp. NJR-2017a WRK4]	tig00000003_pilon_C.paspali	1087112	1087979
g3925.t1	Y(0.901)	-	Cytoplasmiceffector	gb|PQE11169.1|	199	250	1	199	199	3	0	0	3.56e-136	60S ribosomal L6 protein [Rutstroemia sp. NJR-2017a BVV2]	tig00000003_pilon_C.paspali	1087112	1087979
g3925.t1	Y(0.901)	-	Cytoplasmiceffector	gb|RDL41917.1|	199	207	4	199	198	53	1	2	8.45e-100	putative ribosomal protein L6.e.B, cytosolic [Phialophora cf. hyalina BP 5553]	tig00000003_pilon_C.paspali	1087112	1087979
g3925.t1	Y(0.901)	-	Cytoplasmiceffector	gb|TEY37149.1|	199	200	1	199	200	33	1	1	1.15e-111	hypothetical protein BOTCAL_0529g00060 [Botryotinia calthae]	tig00000003_pilon_C.paspali	1087112	1087979
g3925.t1	Y(0.901)	-	Cytoplasmiceffector	gb|TGO26118.1|	199	200	1	199	200	33	1	1	4.68e-113	hypothetical protein BPAE_0066g00440 [Botrytis paeoniae]	tig00000003_pilon_C.paspali	1087112	1087979
g3925.t1	Y(0.901)	-	Cytoplasmiceffector	gb|TGO64525.1|	199	200	1	199	200	32	1	1	3.48e-113	hypothetical protein BOTNAR_0087g00050 [Botryotinia narcissicola]	tig00000003_pilon_C.paspali	1087112	1087979
g3925.t1	Y(0.901)	-	Cytoplasmiceffector	ref|XP_001549136.1|	199	200	1	199	200	32	1	1	3.08e-113	hypothetical protein BCIN_11g05900 [Botrytis cinerea B05.10]	tig00000003_pilon_C.paspali	1087112	1087979
g3925.t1	Y(0.901)	-	Cytoplasmiceffector	ref|XP_001596961.1|	199	200	1	199	200	32	1	1	6.64e-113	60S ribosomal protein L6 [Sclerotinia sclerotiorum 1980 UF-70]	tig00000003_pilon_C.paspali	1087112	1087979
g3927.t1	Y(0.971)	-	Cytoplasmiceffector	gb|ESZ91866.1|	192	192	1	190	190	21	0	0	1.57e-117	60S ribosomal protein L9 [Sclerotinia borealis F-4128]	tig00000003_pilon_C.paspali	1093000	1093927
g3927.t1	Y(0.971)	-	Cytoplasmiceffector	gb|PQE06385.1|	192	191	1	190	190	10	0	0	6.18e-128	ribosomal L6 protein [Rutstroemia sp. NJR-2017a WRK4]	tig00000003_pilon_C.paspali	1093000	1093927
g3927.t1	Y(0.971)	-	Cytoplasmiceffector	gb|PQE11156.1|	192	191	1	190	190	12	0	0	3.7e-126	putative ribosomal protein [Rutstroemia sp. NJR-2017a BVV2]	tig00000003_pilon_C.paspali	1093000	1093927
g3927.t1	Y(0.971)	-	Cytoplasmiceffector	gb|PQE25776.1|	192	191	1	190	190	10	0	0	5.54e-128	60S ribosomal L9 protein [Rutstroemia sp. NJR-2017a BBW]	tig00000003_pilon_C.paspali	1093000	1093927
g3927.t1	Y(0.971)	-	Cytoplasmiceffector	gb|TGO16160.1|	192	191	1	190	190	21	0	0	1.23e-118	hypothetical protein BTUL_0031g00250 [Botrytis tulipae]	tig00000003_pilon_C.paspali	1093000	1093927
g3927.t1	Y(0.971)	-	Cytoplasmiceffector	gb|TGO26116.1|	192	191	1	190	190	21	0	0	2.25e-118	hypothetical protein BPAE_0066g00420 [Botrytis paeoniae]	tig00000003_pilon_C.paspali	1093000	1093927
g3927.t1	Y(0.971)	-	Cytoplasmiceffector	gb|TGO64523.1|	192	191	1	190	190	20	0	0	6.74e-119	hypothetical protein BOTNAR_0087g00030 [Botryotinia narcissicola]	tig00000003_pilon_C.paspali	1093000	1093927
g3927.t1	Y(0.971)	-	Cytoplasmiceffector	ref|XP_001596964.1|	192	191	1	190	190	20	0	0	4.07e-119	60S ribosomal protein L9 [Sclerotinia sclerotiorum 1980 UF-70]	tig00000003_pilon_C.paspali	1093000	1093927
g3927.t1	Y(0.971)	-	Cytoplasmiceffector	ref|XP_018074733.1|	192	192	1	191	192	26	1	1	5.09e-117	ribosomal protein L6 [Phialocephala scopiformis]	tig00000003_pilon_C.paspali	1093000	1093927
g3927.t1	Y(0.971)	-	Cytoplasmiceffector	ref|XP_024551905.1|	192	191	1	190	190	20	0	0	1.39e-119	hypothetical protein BCIN_11g05920 [Botrytis cinerea B05.10]	tig00000003_pilon_C.paspali	1093000	1093927
g394.t1	Y(0.943)	Y(0.526)	Cytoplasmic/apoplasticeffector	emb|SDT90668.1|	122	505	69	117	51	28	1	2	8.9	hypothetical protein SAMN04489714_0769 [Schaalia radingae]	tig00000001_pilon_C.paspali	1079463	1079831
g394.t1	Y(0.943)	Y(0.526)	Cytoplasmic/apoplasticeffector	gb|TAH36419.1|	122	349	3	107	108	58	5	18	1.7	cytochrome bc complex cytochrome b subunit [Planctomycetes bacterium]	tig00000001_pilon_C.paspali	1079463	1079831
g394.t1	Y(0.943)	Y(0.526)	Cytoplasmic/apoplasticeffector	ref|WP_005568672.1|	122	345	61	122	62	43	0	0	7.3	methane/phenol/toluene hydroxylase [Rhodococcus wratislaviensis]	tig00000001_pilon_C.paspali	1079463	1079831
g394.t1	Y(0.943)	Y(0.526)	Cytoplasmic/apoplasticeffector	ref|WP_058236421.1|	122	501	69	117	51	28	1	2	8.8	hypothetical protein [Actinomyces ihuae]	tig00000001_pilon_C.paspali	1079463	1079831
g394.t1	Y(0.943)	Y(0.526)	Cytoplasmic/apoplasticeffector	ref|WP_064080887.1|	122	345	61	122	62	43	0	0	7.2	toluene hydroxylase [Rhodococcus opacus]	tig00000001_pilon_C.paspali	1079463	1079831
g394.t1	Y(0.943)	Y(0.526)	Cytoplasmic/apoplasticeffector	ref|WP_068498813.1|	122	263	15	91	83	44	3	13	3.6	DUF3153 domain-containing protein [Paenibacillus kribbensis]	tig00000001_pilon_C.paspali	1079463	1079831
g394.t1	Y(0.943)	Y(0.526)	Cytoplasmic/apoplasticeffector	ref|WP_070725952.1|	122	505	69	117	51	28	1	2	9.4	hypothetical protein [Actinomyces sp. HMSC065F12]	tig00000001_pilon_C.paspali	1079463	1079831
g394.t1	Y(0.943)	Y(0.526)	Cytoplasmic/apoplasticeffector	ref|WP_092648448.1|	122	501	69	117	51	28	1	2	8.7	hypothetical protein [Schaalia radingae]	tig00000001_pilon_C.paspali	1079463	1079831
g394.t1	Y(0.943)	Y(0.526)	Cytoplasmic/apoplasticeffector	ref|WP_109335592.1|	122	345	61	122	62	43	0	0	7.1	toluene hydroxylase [Rhodococcus sp. S2-17]	tig00000001_pilon_C.paspali	1079463	1079831
g3956.t1	Y(0.931)	-	Cytoplasmiceffector	emb|CZR68280.1|	143	299	1	137	138	72	2	10	4.19e-28	uncharacterized protein PAC_18179 [Phialocephala subalpina]	tig00000003_pilon_C.paspali	1187947	1188378
g3956.t1	Y(0.931)	-	Cytoplasmiceffector	gb|KHJ84795.1|	143	164	2	99	98	63	3	7	0.8	hypothetical protein OESDEN_15486 [Oesophagostomum dentatum]	tig00000003_pilon_C.paspali	1187947	1188378
g3956.t1	Y(0.931)	-	Cytoplasmiceffector	gb|KPM34739.1|	143	274	12	113	104	58	4	17	1.9	hypothetical protein AK830_g11829 [Neonectria ditissima]	tig00000003_pilon_C.paspali	1187947	1188378
g3956.t1	Y(0.931)	-	Cytoplasmiceffector	gb|MAZ86187.1|	143	132	8	92	99	57	3	14	0.54	hypothetical protein [Cellvibrionaceae bacterium]	tig00000003_pilon_C.paspali	1187947	1188378
g3956.t1	Y(0.931)	-	Cytoplasmiceffector	gb|OWP04566.1|	143	307	12	137	136	73	6	23	0.75	hypothetical protein B2J93_1425 [Marssonina coronariae]	tig00000003_pilon_C.paspali	1187947	1188378
g3956.t1	Y(0.931)	-	Cytoplasmiceffector	gb|PQE04469.1|	143	285	1	142	142	34	0	0	1.11e-72	hypothetical protein CJF31_00007282 [Rutstroemia sp. NJR-2017a BVV2]	tig00000003_pilon_C.paspali	1187947	1188378
g3956.t1	Y(0.931)	-	Cytoplasmiceffector	gb|PQE09525.1|	143	286	1	142	142	31	0	0	5.64e-76	hypothetical protein CJF30_00010616 [Rutstroemia sp. NJR-2017a BBW]	tig00000003_pilon_C.paspali	1187947	1188378
g3956.t1	Y(0.931)	-	Cytoplasmiceffector	gb|PQE24891.1|	143	286	1	142	142	30	0	0	2.51e-76	hypothetical protein CJF32_00007249 [Rutstroemia sp. NJR-2017a WRK4]	tig00000003_pilon_C.paspali	1187947	1188378
g3956.t1	Y(0.931)	-	Cytoplasmiceffector	gb|PSR83505.1|	143	233	12	117	109	61	3	15	1.5	hypothetical protein BD289DRAFT_435803 [Coniella lustricola]	tig00000003_pilon_C.paspali	1187947	1188378
g3956.t1	Y(0.931)	-	Cytoplasmiceffector	ref|WP_100690506.1|	143	432	7	103	98	58	5	11	1.4	hypothetical protein [Idiomarina sp. X4]	tig00000003_pilon_C.paspali	1187947	1188378
g4038.t1	Y(0.929)	-	Cytoplasmiceffector	gb|ESZ90477.1|	123	120	1	123	123	47	2	3	1.72e-44	60S ribosomal protein L22 [Sclerotinia borealis F-4128]	tig00000003_pilon_C.paspali	1489965	1490547
g4038.t1	Y(0.929)	-	Cytoplasmiceffector	gb|PQE11023.1|	123	157	5	123	119	4	0	0	1.96e-79	60S ribosomal L22 protein [Rutstroemia sp. NJR-2017a BVV2]	tig00000003_pilon_C.paspali	1489965	1490547
g4038.t1	Y(0.929)	-	Cytoplasmiceffector	gb|PQE21047.1|	123	123	1	123	123	3	0	0	1.03e-83	60S ribosomal L22 protein [Rutstroemia sp. NJR-2017a WRK4]	tig00000003_pilon_C.paspali	1489965	1490547
g4038.t1	Y(0.929)	-	Cytoplasmiceffector	gb|RAL58627.1|	123	120	1	123	123	42	3	3	2.26e-47	hypothetical protein DID88_003547 [Monilinia fructigena]	tig00000003_pilon_C.paspali	1489965	1490547
g4038.t1	Y(0.929)	-	Cytoplasmiceffector	gb|TGO20061.1|	123	121	1	123	123	44	2	2	4.81e-48	hypothetical protein BTUL_0001g00680 [Botrytis tulipae]	tig00000003_pilon_C.paspali	1489965	1490547
g4038.t1	Y(0.929)	-	Cytoplasmiceffector	gb|TGO29132.1|	123	121	1	123	123	48	2	2	4.28e-45	hypothetical protein BPAE_0018g00180 [Botrytis paeoniae]	tig00000003_pilon_C.paspali	1489965	1490547
g4038.t1	Y(0.929)	-	Cytoplasmiceffector	gb|TGO33361.1|	123	121	1	123	123	45	2	2	2.54e-47	hypothetical protein BHYA_0250g00070 [Botrytis hyacinthi]	tig00000003_pilon_C.paspali	1489965	1490547
g4038.t1	Y(0.929)	-	Cytoplasmiceffector	gb|TGO81911.1|	123	121	1	123	123	47	2	2	5.45e-45	hypothetical protein BPOR_0974g00010 [Botrytis porri]	tig00000003_pilon_C.paspali	1489965	1490547
g4038.t1	Y(0.929)	-	Cytoplasmiceffector	ref|XP_001547872.1|	123	121	1	123	123	47	2	2	9.76e-46	hypothetical protein BCIN_14g04100 [Botrytis cinerea B05.10]	tig00000003_pilon_C.paspali	1489965	1490547
g4038.t1	Y(0.929)	-	Cytoplasmiceffector	ref|XP_001588789.1|	123	120	1	123	123	41	3	3	8.8e-48	60S ribosomal protein L22 SS1G_10336 [Sclerotinia sclerotiorum 1980 UF-70]	tig00000003_pilon_C.paspali	1489965	1490547
g4040.t1	Y(0.917)	-	Cytoplasmiceffector	emb|CCD50029.1|	95	58	1	41	41	18	0	0	5.9e-09	hypothetical protein BofuT4_P093010.1 [Botrytis cinerea T4]	tig00000003_pilon_C.paspali	1497031	1497594
g4040.t1	Y(0.917)	-	Cytoplasmiceffector	gb|PQE11028.1|	95	80	1	68	68	20	1	1	9.1e-26	hypothetical protein CJF31_00000759 [Rutstroemia sp. NJR-2017a BVV2]	tig00000003_pilon_C.paspali	1497031	1497594
g4040.t1	Y(0.917)	-	Cytoplasmiceffector	gb|PQE21050.1|	95	79	1	54	54	15	0	0	1.4e-21	hypothetical protein CJF32_00005489 [Rutstroemia sp. NJR-2017a WRK4]	tig00000003_pilon_C.paspali	1497031	1497594
g4040.t1	Y(0.917)	-	Cytoplasmiceffector	gb|PQE25622.1|	95	79	1	60	60	16	0	0	2.15e-25	hypothetical protein CJF30_00000325 [Rutstroemia sp. NJR-2017a BBW]	tig00000003_pilon_C.paspali	1497031	1497594
g4040.t1	Y(0.917)	-	Cytoplasmiceffector	ref|WP_019917128.1|	95	291	10	86	78	49	2	2	1.6	sensor histidine kinase [Methyloversatilis discipulorum]	tig00000003_pilon_C.paspali	1497031	1497594
g4040.t1	Y(0.917)	-	Cytoplasmiceffector	ref|WP_043364266.1|	95	290	10	86	78	50	2	2	6.1	two-component sensor histidine kinase [Methyloversatilis discipulorum]	tig00000003_pilon_C.paspali	1497031	1497594
g4040.t1	Y(0.917)	-	Cytoplasmiceffector	ref|XP_001588784.1|	95	82	1	37	37	16	0	0	4.85e-07	predicted protein [Sclerotinia sclerotiorum 1980 UF-70]	tig00000003_pilon_C.paspali	1497031	1497594
g4074.t1	Y(0.932)	-	Cytoplasmiceffector	gb|ESZ89526.1|	219	224	35	219	189	21	2	4	7.57e-107	putative H/ACA ribonucleoprotein complex subunit 2 [Sclerotinia borealis F-4128]	tig00000003_pilon_C.paspali	1578000	1578723
g4074.t1	Y(0.932)	-	Cytoplasmiceffector	gb|PQE08897.1|	219	217	21	219	199	12	0	0	5.78e-117	ribosome biogenesis nhp2 protein [Rutstroemia sp. NJR-2017a BVV2]	tig00000003_pilon_C.paspali	1578000	1578723
g4074.t1	Y(0.932)	-	Cytoplasmiceffector	gb|PQE21015.1|	219	219	1	219	219	15	0	0	1.33e-116	ribosome biogenesis nhp2 protein [Rutstroemia sp. NJR-2017a WRK4]	tig00000003_pilon_C.paspali	1578000	1578723
g4074.t1	Y(0.932)	-	Cytoplasmiceffector	gb|PQE25579.1|	219	219	1	219	219	16	0	0	5.08e-116	ribosomal L7Ae L30e S12e Gadd45 protein [Rutstroemia sp. NJR-2017a BBW]	tig00000003_pilon_C.paspali	1578000	1578723
g4074.t1	Y(0.932)	-	Cytoplasmiceffector	gb|PVH83714.1|	219	224	1	219	225	41	2	7	2.04e-108	L30e-like protein [Cadophora sp. DSE1049]	tig00000003_pilon_C.paspali	1578000	1578723
g4074.t1	Y(0.932)	-	Cytoplasmiceffector	gb|TGO66297.1|	219	224	35	219	189	23	3	4	4.5e-105	hypothetical protein BOTNAR_0064g00350 [Botryotinia narcissicola]	tig00000003_pilon_C.paspali	1578000	1578723
g4074.t1	Y(0.932)	-	Cytoplasmiceffector	gb|TGO73226.1|	219	224	35	219	189	23	3	4	8.68e-105	hypothetical protein BELL_0379g00060 [Botrytis elliptica]	tig00000003_pilon_C.paspali	1578000	1578723
g4074.t1	Y(0.932)	-	Cytoplasmiceffector	gb|THV47984.1|	219	224	35	219	189	22	3	4	3.73e-105	hypothetical protein BGAL_0275g00080 [Botrytis galanthina]	tig00000003_pilon_C.paspali	1578000	1578723
g4074.t1	Y(0.932)	-	Cytoplasmiceffector	ref|XP_001545578.1|	219	224	35	219	189	22	3	4	4.26e-105	hypothetical protein BCIN_14g04850 [Botrytis cinerea B05.10]	tig00000003_pilon_C.paspali	1578000	1578723
g4074.t1	Y(0.932)	-	Cytoplasmiceffector	ref|XP_024742693.1|	219	221	21	219	201	25	2	2	7.11e-106	L30e-like protein [Meliniomyces bicolor E]	tig00000003_pilon_C.paspali	1578000	1578723
g4115.t1	Y(0.96)	-	Cytoplasmiceffector	gb|EMR89205.1|	153	156	5	153	149	26	0	0	3.42e-84	putative prefoldin subunit protein [Botrytis cinerea BcDW1]	tig00000003_pilon_C.paspali	2085539	2086650
g4115.t1	Y(0.96)	-	Cytoplasmiceffector	gb|PMD22932.1|	153	158	1	145	145	20	0	0	1.63e-85	Prefoldin alpha subunit [Pezoloma ericae]	tig00000003_pilon_C.paspali	2085539	2086650
g4115.t1	Y(0.96)	-	Cytoplasmiceffector	gb|PMD48306.1|	153	158	1	145	145	20	0	0	4.92e-84	Prefoldin alpha subunit [Hyaloscypha variabilis F]	tig00000003_pilon_C.paspali	2085539	2086650
g4115.t1	Y(0.96)	-	Cytoplasmiceffector	gb|PQE24580.1|	153	150	1	153	153	7	1	5	8.93e-95	prefoldin subunit protein [Rutstroemia sp. NJR-2017a WRK4]	tig00000003_pilon_C.paspali	2085539	2086650
g4115.t1	Y(0.96)	-	Cytoplasmiceffector	gb|TGO14818.1|	153	156	5	153	149	25	0	0	3.99e-85	hypothetical protein BTUL_0048g00580 [Botrytis tulipae]	tig00000003_pilon_C.paspali	2085539	2086650
g4115.t1	Y(0.96)	-	Cytoplasmiceffector	gb|TGO27573.1|	153	156	5	153	149	24	0	0	1.49e-85	hypothetical protein BPAE_0040g00540 [Botrytis paeoniae]	tig00000003_pilon_C.paspali	2085539	2086650
g4115.t1	Y(0.96)	-	Cytoplasmiceffector	gb|TGO41206.1|	153	156	5	153	149	25	0	0	8.05e-85	hypothetical protein BHYA_0025g00580 [Botrytis hyacinthi]	tig00000003_pilon_C.paspali	2085539	2086650
g4115.t1	Y(0.96)	-	Cytoplasmiceffector	gb|THV46753.1|	153	156	5	153	149	25	0	0	1.36e-84	hypothetical protein BGAL_0362g00030 [Botrytis galanthina]	tig00000003_pilon_C.paspali	2085539	2086650
g4115.t1	Y(0.96)	-	Cytoplasmiceffector	ref|XP_001545904.1|	153	156	5	153	149	27	0	0	1.96e-83	Bcgim5 [Botrytis cinerea B05.10]	tig00000003_pilon_C.paspali	2085539	2086650
g4115.t1	Y(0.96)	-	Cytoplasmiceffector	ref|XP_024732547.1|	153	158	1	145	145	21	0	0	2.39e-84	Prefoldin alpha subunit [Meliniomyces bicolor E]	tig00000003_pilon_C.paspali	2085539	2086650
g4135.t1	Y(0.992)	-	Cytoplasmiceffector	gb|OJY84570.1|	76	369	1	42	42	21	1	3	6.2	4-hydroxythreonine-4-phosphate dehydrogenase PdxA [Sphingobacteriales bacterium 44-15]	tig00000003_pilon_C.paspali	2137865	2138095
g4135.t1	Y(0.992)	-	Cytoplasmiceffector	gb|OZB20091.1|	76	351	11	76	66	46	0	0	7	diaminopimelate decarboxylase, partial [Marinobacter sp. 34-60-7]	tig00000003_pilon_C.paspali	2137865	2138095
g4135.t1	Y(0.992)	-	Cytoplasmiceffector	ref|WP_003034740.1|	76	1339	6	74	69	45	1	1	8.9	ATP-dependent RNA helicase HrpA [Francisella tularensis]	tig00000003_pilon_C.paspali	2137865	2138095
g4135.t1	Y(0.992)	-	Cytoplasmiceffector	ref|WP_003040385.1|	76	1339	6	74	69	45	1	1	9.2	ATP-dependent RNA helicase HrpA [Francisella tularensis]	tig00000003_pilon_C.paspali	2137865	2138095
g4135.t1	Y(0.992)	-	Cytoplasmiceffector	ref|WP_014548782.1|	76	1307	6	74	69	44	1	1	2.4	ATP-dependent RNA helicase HrpA [Francisella hispaniensis]	tig00000003_pilon_C.paspali	2137865	2138095
g4135.t1	Y(0.992)	-	Cytoplasmiceffector	ref|WP_036134071.1|	76	398	22	76	55	33	1	2	6.4	type III PLP-dependent enzyme [Marinobacter nitratireducens]	tig00000003_pilon_C.paspali	2137865	2138095
g4135.t1	Y(0.992)	-	Cytoplasmiceffector	ref|WP_071660464.1|	76	1339	6	74	69	45	1	1	9	ATP-dependent RNA helicase HrpA [Francisella tularensis]	tig00000003_pilon_C.paspali	2137865	2138095
g4135.t1	Y(0.992)	-	Cytoplasmiceffector	ref|WP_076730785.1|	76	435	6	74	69	45	1	1	9.6	DUF3418 domain-containing protein [Francisella tularensis]	tig00000003_pilon_C.paspali	2137865	2138095
g4135.t1	Y(0.992)	-	Cytoplasmiceffector	ref|WP_085143929.1|	76	213	36	74	39	21	0	0	6.1	DUF3418 domain-containing protein [Francisella tularensis]	tig00000003_pilon_C.paspali	2137865	2138095
g4138.t1	Y(0.952)	-	Cytoplasmiceffector	gb|APA14819.1|	77	80	15	74	60	5	0	0	1.66e-32	hypothetical protein sscle_13g095890 [Sclerotinia sclerotiorum 1980 UF-70]	tig00000003_pilon_C.paspali	2147637	2148001
g4138.t1	Y(0.952)	-	Cytoplasmiceffector	gb|EPS25735.1|	77	83	15	75	61	16	0	0	2.12e-26	hypothetical protein PDE_00671 [Penicillium oxalicum 114-2]	tig00000003_pilon_C.paspali	2147637	2148001
g4138.t1	Y(0.952)	-	Cytoplasmiceffector	gb|PMD17607.1|	77	80	15	77	63	13	0	0	3.3e-28	DUF1903-domain-containing protein [Pezoloma ericae]	tig00000003_pilon_C.paspali	2147637	2148001
g4138.t1	Y(0.952)	-	Cytoplasmiceffector	gb|PMD48667.1|	77	78	1	71	71	19	0	0	1.55e-27	DUF1903-domain-containing protein [Hyaloscypha variabilis F]	tig00000003_pilon_C.paspali	2147637	2148001
g4138.t1	Y(0.952)	-	Cytoplasmiceffector	gb|PVH74722.1|	77	81	15	76	62	6	0	0	1.16e-32	DUF1903-domain-containing protein [Cadophora sp. DSE1049]	tig00000003_pilon_C.paspali	2147637	2148001
g4138.t1	Y(0.952)	-	Cytoplasmiceffector	ref|XP_018074588.1|	77	85	15	75	61	12	0	0	4.73e-28	DUF1903-domain-containing protein [Phialocephala scopiformis]	tig00000003_pilon_C.paspali	2147637	2148001
g4138.t1	Y(0.952)	-	Cytoplasmiceffector	ref|XP_018191877.1|	77	71	8	74	67	21	0	0	3.25e-26	DUF1903-domain-containing protein [Xylona heveae TC161]	tig00000003_pilon_C.paspali	2147637	2148001
g4138.t1	Y(0.952)	-	Cytoplasmiceffector	ref|XP_024551757.1|	77	80	15	74	60	7	0	0	1.19e-30	Bccmc4 [Botrytis cinerea B05.10]	tig00000003_pilon_C.paspali	2147637	2148001
g4138.t1	Y(0.952)	-	Cytoplasmiceffector	ref|XP_024716767.1|	77	81	15	74	60	8	0	0	1.52e-29	hypothetical protein M430DRAFT_148274 [Amorphotheca resinae ATCC 22711]	tig00000003_pilon_C.paspali	2147637	2148001
g4138.t1	Y(0.952)	-	Cytoplasmiceffector	ref|XP_024732908.1|	77	86	16	77	62	13	0	0	4.46e-27	hypothetical protein K444DRAFT_617100 [Meliniomyces bicolor E]	tig00000003_pilon_C.paspali	2147637	2148001
g4158.t1	Y(0.96)	-	Cytoplasmiceffector	emb|VCU40463.1|	112	2139	1	94	94	38	0	0	3.67e-31	Bgt-51748 [Blumeria graminis f. sp. tritici]	tig00000003_pilon_C.paspali	2200263	2200601
g4158.t1	Y(0.96)	-	Cytoplasmiceffector	gb|KHJ34314.1|	112	167	1	95	95	42	0	0	6.79e-31	hypothetical protein EV44_g3764 [Erysiphe necator]	tig00000003_pilon_C.paspali	2200263	2200601
g4158.t1	Y(0.96)	-	Cytoplasmiceffector	gb|POS81641.1|	112	138	1	92	92	31	0	0	1.36e-34	hypothetical protein EPUL_006635, partial [Erysiphe pulchra]	tig00000003_pilon_C.paspali	2200263	2200601
g4158.t1	Y(0.96)	-	Cytoplasmiceffector	gb|POS81850.1|	112	246	1	90	90	33	0	0	3.93e-30	hypothetical protein EPUL_006718, partial [Erysiphe pulchra]	tig00000003_pilon_C.paspali	2200263	2200601
g4158.t1	Y(0.96)	-	Cytoplasmiceffector	gb|POS81928.1|	112	283	1	95	95	34	0	0	3.33e-34	hypothetical protein EPUL_005559, partial [Erysiphe pulchra]	tig00000003_pilon_C.paspali	2200263	2200601
g4158.t1	Y(0.96)	-	Cytoplasmiceffector	gb|POS81989.1|	112	561	1	95	95	31	0	0	3.45e-34	hypothetical protein EPUL_006423, partial [Erysiphe pulchra]	tig00000003_pilon_C.paspali	2200263	2200601
g4158.t1	Y(0.96)	-	Cytoplasmiceffector	gb|POS82473.1|	112	101	1	95	95	39	0	0	5.77e-32	hypothetical protein EPUL_006440, partial [Erysiphe pulchra]	tig00000003_pilon_C.paspali	2200263	2200601
g4158.t1	Y(0.96)	-	Cytoplasmiceffector	gb|POS86061.1|	112	223	1	95	95	39	0	0	3.87e-30	hypothetical protein EPUL_002468 [Erysiphe pulchra]	tig00000003_pilon_C.paspali	2200263	2200601
g4158.t1	Y(0.96)	-	Cytoplasmiceffector	gb|RKF58573.1|	112	167	1	94	94	41	0	0	5.58e-31	hypothetical protein OnM2_066068 [Oidium neolycopersici]	tig00000003_pilon_C.paspali	2200263	2200601
g4158.t1	Y(0.96)	-	Cytoplasmiceffector	gb|RKF80182.1|	112	222	1	95	95	35	0	0	4.22e-33	hypothetical protein GcC1_039049 [Golovinomyces cichoracearum]	tig00000003_pilon_C.paspali	2200263	2200601
g4173.t1	Y(0.936)	-	Cytoplasmiceffector	gb|KFX92559.1|	110	661	16	106	96	42	1	5	2.31e-22	hypothetical protein O988_07212 [Pseudogymnoascus sp. VKM F-3808]	tig00000003_pilon_C.paspali	2248672	2249004
g4173.t1	Y(0.936)	-	Cytoplasmiceffector	gb|KFX96209.1|	110	662	16	103	93	40	1	5	1.11e-21	hypothetical protein V490_03473 [Pseudogymnoascus sp. VKM F-3557]	tig00000003_pilon_C.paspali	2248672	2249004
g4173.t1	Y(0.936)	-	Cytoplasmiceffector	gb|OAL01641.1|	110	675	16	106	91	37	1	5	2.54e-22	thiamine pyrophosphate enzyme, partial [Stagonospora sp. SRC1lsM3a]	tig00000003_pilon_C.paspali	2248672	2249004
g4173.t1	Y(0.936)	-	Cytoplasmiceffector	gb|OAL54775.1|	110	676	16	106	96	40	1	5	3.08e-22	thiamine pyrophosphate enzyme [Pyrenochaeta sp. DS3sAY3a]	tig00000003_pilon_C.paspali	2248672	2249004
g4173.t1	Y(0.936)	-	Cytoplasmiceffector	gb|OTB08338.1|	110	670	16	106	96	34	1	5	4.21e-24	hypothetical protein M426DRAFT_316963 [Hypoxylon sp. CI-4A]	tig00000003_pilon_C.paspali	2248672	2249004
g4173.t1	Y(0.936)	-	Cytoplasmiceffector	gb|PQE08955.1|	110	601	16	110	95	8	0	0	2.85e-50	thiamine pyrophosphate enzyme protein [Rutstroemia sp. NJR-2017a WRK4]	tig00000003_pilon_C.paspali	2248672	2249004
g4173.t1	Y(0.936)	-	Cytoplasmiceffector	gb|PVI03646.1|	110	661	16	108	93	39	1	4	7.15e-22	thiamine pyrophosphate enzyme [Periconia macrospinosa]	tig00000003_pilon_C.paspali	2248672	2249004
g4173.t1	Y(0.936)	-	Cytoplasmiceffector	gb|RYN17145.1|	110	609	16	106	95	35	1	4	6.3e-22	hypothetical protein AA0115_g11980 [Alternaria tenuissima]	tig00000003_pilon_C.paspali	2248672	2249004
g4173.t1	Y(0.936)	-	Cytoplasmiceffector	gb|TAQ90844.1|	110	607	16	110	95	9	0	0	3.93e-50	hypothetical protein B7494_g863 [Chlorociboria aeruginascens]	tig00000003_pilon_C.paspali	2248672	2249004
g4173.t1	Y(0.936)	-	Cytoplasmiceffector	ref|XP_013324389.1|	110	567	17	106	93	34	2	4	2.85e-24	Thiamine pyrophosphate enzyme [Rasamsonia emersonii CBS 393.64]	tig00000003_pilon_C.paspali	2248672	2249004
g419.t1	Y(0.922)	-	Cytoplasmiceffector	gb|RKF75875.1|	85	1063	1	74	78	54	1	4	6.2	putative translation regulator protein [Golovinomyces cichoracearum]	tig00000001_pilon_C.paspali	1157719	1157976
g419.t1	Y(0.922)	-	Cytoplasmiceffector	ref|WP_037240236.1|	85	101	19	67	49	34	0	0	9	ETC complex I subunit [Rhodomicrobium udaipurense]	tig00000001_pilon_C.paspali	1157719	1157976
g4207.t1	Y(0.907)	-	Cytoplasmiceffector	emb|CZS90392.1|	154	154	1	154	154	10	0	0	2.19e-103	probable mago nashi protein [Rhynchosporium commune]	tig00000003_pilon_C.paspali	2336984	2337726
g4207.t1	Y(0.907)	-	Cytoplasmiceffector	emb|CZT01543.1|	154	154	1	154	154	10	0	0	1.15e-103	probable mago nashi protein [Rhynchosporium agropyri]	tig00000003_pilon_C.paspali	2336984	2337726
g4207.t1	Y(0.907)	-	Cytoplasmiceffector	emb|CZT48314.1|	154	154	1	154	154	9	0	0	5.62e-104	probable mago nashi protein [Rhynchosporium secalis]	tig00000003_pilon_C.paspali	2336984	2337726
g4207.t1	Y(0.907)	-	Cytoplasmiceffector	gb|PMD14545.1|	154	154	1	154	154	8	0	0	1.96e-104	Mago nashi protein [Pezoloma ericae]	tig00000003_pilon_C.paspali	2336984	2337726
g4207.t1	Y(0.907)	-	Cytoplasmiceffector	gb|PMD48743.1|	154	154	1	154	154	9	0	0	2.78e-104	mago nashi domain-containing protein [Hyaloscypha variabilis F]	tig00000003_pilon_C.paspali	2336984	2337726
g4207.t1	Y(0.907)	-	Cytoplasmiceffector	gb|PVH87306.1|	154	154	1	154	154	9	0	0	2.84e-104	Mago nashi protein [Cadophora sp. DSE1049]	tig00000003_pilon_C.paspali	2336984	2337726
g4207.t1	Y(0.907)	-	Cytoplasmiceffector	gb|RAL65152.1|	154	154	1	154	154	8	0	0	5.08e-105	hypothetical protein DID88_001258 [Monilinia fructigena]	tig00000003_pilon_C.paspali	2336984	2337726
g4207.t1	Y(0.907)	-	Cytoplasmiceffector	gb|TAQ87100.1|	154	154	1	154	154	10	0	0	1.16e-103	hypothetical protein B7494_g4562 [Chlorociboria aeruginascens]	tig00000003_pilon_C.paspali	2336984	2337726
g4207.t1	Y(0.907)	-	Cytoplasmiceffector	ref|XP_024551693.1|	154	154	1	154	154	9	0	0	1.48e-103	hypothetical protein BCIN_11g02320 [Botrytis cinerea B05.10]	tig00000003_pilon_C.paspali	2336984	2337726
g4207.t1	Y(0.907)	-	Cytoplasmiceffector	ref|XP_024740951.1|	154	154	1	154	154	8	0	0	6.19e-105	mago nashi domain-containing protein [Meliniomyces bicolor E]	tig00000003_pilon_C.paspali	2336984	2337726
g420.t1	Y(0.9)	-	Cytoplasmiceffector	emb|CZR51976.1|	218	208	1	201	201	55	2	5	3.13e-94	uncharacterized protein PAC_01853 [Phialocephala subalpina]	tig00000001_pilon_C.paspali	1158653	1159309
g420.t1	Y(0.9)	-	Cytoplasmiceffector	gb|PBP18165.1|	218	204	4	202	204	59	3	10	3.21e-90	SET domain-containing protein [Diplocarpon rosae]	tig00000001_pilon_C.paspali	1158653	1159309
g420.t1	Y(0.9)	-	Cytoplasmiceffector	gb|PMD35320.1|	218	208	4	205	207	59	2	9	3.69e-94	hypothetical protein L207DRAFT_516268 [Hyaloscypha variabilis F]	tig00000001_pilon_C.paspali	1158653	1159309
g420.t1	Y(0.9)	-	Cytoplasmiceffector	gb|PQE17706.1|	218	218	1	218	218	24	0	0	4.91e-131	set domain-containing protein [Rutstroemia sp. NJR-2017a BVV2]	tig00000001_pilon_C.paspali	1158653	1159309
g420.t1	Y(0.9)	-	Cytoplasmiceffector	gb|PQE25453.1|	218	218	1	217	217	23	0	0	1.64e-132	set domain-containing protein [Rutstroemia sp. NJR-2017a BBW]	tig00000001_pilon_C.paspali	1158653	1159309
g420.t1	Y(0.9)	-	Cytoplasmiceffector	gb|PQE33715.1|	218	218	1	217	217	26	0	0	1.6e-130	set domain-containing protein [Rutstroemia sp. NJR-2017a WRK4]	tig00000001_pilon_C.paspali	1158653	1159309
g420.t1	Y(0.9)	-	Cytoplasmiceffector	gb|PVH84206.1|	218	213	8	203	214	47	3	23	2e-95	SET domain-containing protein [Cadophora sp. DSE1049]	tig00000001_pilon_C.paspali	1158653	1159309
g420.t1	Y(0.9)	-	Cytoplasmiceffector	gb|TAQ89318.1|	218	224	1	213	218	67	3	6	5.04e-89	hypothetical protein B7494_g2336 [Chlorociboria aeruginascens]	tig00000001_pilon_C.paspali	1158653	1159309
g420.t1	Y(0.9)	-	Cytoplasmiceffector	ref|XP_001589829.1|	218	262	1	208	222	67	4	14	5.09e-90	hypothetical protein SS1G_09551 [Sclerotinia sclerotiorum 1980 UF-70]	tig00000001_pilon_C.paspali	1158653	1159309
g420.t1	Y(0.9)	-	Cytoplasmiceffector	ref|XP_018077424.1|	218	202	1	201	202	59	2	5	2.28e-93	SET domain-containing protein [Phialocephala scopiformis]	tig00000001_pilon_C.paspali	1158653	1159309
g4240.t1	Y(0.903)	-	Cytoplasmiceffector	gb|TGO11722.1|	164	286	7	164	170	59	3	14	1.87e-58	hypothetical protein BTUL_0103g00190 [Botrytis tulipae]	tig00000003_pilon_C.paspali	2424860	2425497
g4240.t1	Y(0.903)	-	Cytoplasmiceffector	gb|TGO30104.1|	164	286	7	164	169	60	2	12	2.54e-57	hypothetical protein BPAE_0008g00960 [Botrytis paeoniae]	tig00000003_pilon_C.paspali	2424860	2425497
g4240.t1	Y(0.903)	-	Cytoplasmiceffector	gb|TGO43147.1|	164	286	7	164	170	59	3	14	6.11e-58	hypothetical protein BHYA_0003g01010 [Botrytis hyacinthi]	tig00000003_pilon_C.paspali	2424860	2425497
g4240.t1	Y(0.903)	-	Cytoplasmiceffector	gb|TGO64446.1|	164	286	7	164	170	57	3	14	1.25e-59	hypothetical protein BCON_0007g00960 [Botryotinia convoluta]	tig00000003_pilon_C.paspali	2424860	2425497
g4240.t1	Y(0.903)	-	Cytoplasmiceffector	gb|TGO69649.1|	164	286	7	164	170	56	3	14	8.17e-60	hypothetical protein BOTNAR_0008g00140 [Botryotinia narcissicola]	tig00000003_pilon_C.paspali	2424860	2425497
g4240.t1	Y(0.903)	-	Cytoplasmiceffector	gb|TGO80209.1|	164	286	7	164	170	59	3	14	2.35e-58	hypothetical protein BELL_0012g00290 [Botrytis elliptica]	tig00000003_pilon_C.paspali	2424860	2425497
g4240.t1	Y(0.903)	-	Cytoplasmiceffector	gb|TGO91634.1|	164	286	7	164	169	61	2	12	6.46e-56	hypothetical protein BPOR_0022g00190 [Botrytis porri]	tig00000003_pilon_C.paspali	2424860	2425497
g4240.t1	Y(0.903)	-	Cytoplasmiceffector	gb|THV46214.1|	164	286	7	164	169	59	2	12	3.54e-60	hypothetical protein BGAL_0406g00140 [Botrytis galanthina]	tig00000003_pilon_C.paspali	2424860	2425497
g4240.t1	Y(0.903)	-	Cytoplasmiceffector	ref|XP_001558222.1|	164	286	7	164	170	59	3	14	4.66e-58	hypothetical protein BCIN_15g02760 [Botrytis cinerea B05.10]	tig00000003_pilon_C.paspali	2424860	2425497
g4240.t1	Y(0.903)	-	Cytoplasmiceffector	ref|XP_001591074.1|	164	283	8	164	168	57	2	14	1.62e-59	hypothetical protein SS1G_07699 [Sclerotinia sclerotiorum 1980 UF-70]	tig00000003_pilon_C.paspali	2424860	2425497
g426.t1	Y(0.905)	-	Cytoplasmiceffector	gb|OGC92601.1|	97	541	3	70	84	42	3	17	6.3	CTP synthase [Candidatus Amesbacteria bacterium RIFCSPHIGHO2_01_FULL_48_32b]	tig00000001_pilon_C.paspali	1175159	1175641
g426.t1	Y(0.905)	-	Cytoplasmiceffector	ref|WP_076237557.1|	97	612	2	41	40	25	0	0	5.2	cell wall metabolism sensor histidine kinase WalK [Paenibacillus sp. FSL H7-0331]	tig00000001_pilon_C.paspali	1175159	1175641
g426.t1	Y(0.905)	-	Cytoplasmiceffector	ref|WP_091001716.1|	97	175	34	73	40	26	0	0	3.3	hypothetical protein [Paenibacillus sp. OK003]	tig00000001_pilon_C.paspali	1175159	1175641
g426.t1	Y(0.905)	-	Cytoplasmiceffector	ref|WP_091174431.1|	97	611	2	41	40	25	0	0	4	cell wall metabolism sensor histidine kinase WalK [Paenibacillus sp. 1_12]	tig00000001_pilon_C.paspali	1175159	1175641
g426.t1	Y(0.905)	-	Cytoplasmiceffector	ref|XP_013190627.1|	97	393	10	78	69	48	0	0	6.5	PREDICTED: cytochrome P450 6B7-like [Amyelois transitella]	tig00000001_pilon_C.paspali	1175159	1175641
g426.t1	Y(0.905)	-	Cytoplasmiceffector	ref|XP_023283422.1|	97	514	5	49	45	21	1	6	9.3	paired box protein Pax-7-like isoform X1 [Seriola lalandi dorsalis]	tig00000001_pilon_C.paspali	1175159	1175641
g4330.t1	Y(0.91)	-	Cytoplasmiceffector	gb|PQE07740.1|	171	171	1	171	171	16	0	0	4.52e-109	hypothetical protein CJF31_00007553 [Rutstroemia sp. NJR-2017a BVV2]	tig00000003_pilon_C.paspali	2663808	2664481
g4330.t1	Y(0.91)	-	Cytoplasmiceffector	gb|PQE29663.1|	171	172	1	171	171	15	0	0	1.31e-109	hypothetical protein CJF30_00009252 [Rutstroemia sp. NJR-2017a BBW]	tig00000003_pilon_C.paspali	2663808	2664481
g4330.t1	Y(0.91)	-	Cytoplasmiceffector	gb|TEY36896.1|	171	175	1	171	172	47	1	1	9.78e-76	hypothetical protein BOTCAL_0538g00050 [Botryotinia calthae]	tig00000003_pilon_C.paspali	2663808	2664481
g4330.t1	Y(0.91)	-	Cytoplasmiceffector	gb|TGO19024.1|	171	175	1	171	172	52	1	1	2.92e-75	hypothetical protein BTUL_0006g00570 [Botrytis tulipae]	tig00000003_pilon_C.paspali	2663808	2664481
g4330.t1	Y(0.91)	-	Cytoplasmiceffector	gb|TGO52926.1|	171	175	1	171	172	51	1	1	8.48e-76	hypothetical protein BOTNAR_0309g00090 [Botryotinia narcissicola]	tig00000003_pilon_C.paspali	2663808	2664481
g4330.t1	Y(0.91)	-	Cytoplasmiceffector	gb|TGO55418.1|	171	175	1	171	172	55	1	1	4.03e-73	hypothetical protein BCON_0092g00010 [Botryotinia convoluta]	tig00000003_pilon_C.paspali	2663808	2664481
g4330.t1	Y(0.91)	-	Cytoplasmiceffector	gb|TGO77328.1|	171	175	1	171	172	53	1	1	1.45e-74	hypothetical protein BELL_0113g00160 [Botrytis elliptica]	tig00000003_pilon_C.paspali	2663808	2664481
g4330.t1	Y(0.91)	-	Cytoplasmiceffector	gb|TGO81845.1|	171	175	1	171	172	51	1	1	1.48e-75	hypothetical protein BPOR_0996g00020 [Botrytis porri]	tig00000003_pilon_C.paspali	2663808	2664481
g4330.t1	Y(0.91)	-	Cytoplasmiceffector	gb|THV50924.1|	171	175	1	171	172	51	1	1	1.26e-75	hypothetical protein BGAL_0130g00050 [Botrytis galanthina]	tig00000003_pilon_C.paspali	2663808	2664481
g4330.t1	Y(0.91)	-	Cytoplasmiceffector	ref|XP_001549501.1|	171	175	1	171	172	50	1	1	3.4e-74	hypothetical protein BCIN_14g03610 [Botrytis cinerea B05.10]	tig00000003_pilon_C.paspali	2663808	2664481
g4341.t1	Y(0.948)	-	Cytoplasmiceffector	gb|PWL26891.1|	80	274	18	75	59	36	1	1	4.4	iron ABC transporter substrate-binding protein [Altererythrobacter sp. XM-24bin4]	tig00000003_pilon_C.paspali	2691590	2691832
g4341.t1	Y(0.948)	-	Cytoplasmiceffector	gb|TGZ72138.1|	80	221	41	79	39	17	2	3	4.2	hypothetical protein CRM22_002256 [Opisthorchis felineus]	tig00000003_pilon_C.paspali	2691590	2691832
g4341.t1	Y(0.948)	-	Cytoplasmiceffector	ref|WP_028407599.1|	80	396	8	64	57	30	2	5	1.8	MULTISPECIES: monooxygenase [Bacillus]	tig00000003_pilon_C.paspali	2691590	2691832
g4341.t1	Y(0.948)	-	Cytoplasmiceffector	ref|WP_060744889.1|	80	396	8	64	57	30	2	5	1.9	monooxygenase [Bacillus megaterium]	tig00000003_pilon_C.paspali	2691590	2691832
g4341.t1	Y(0.948)	-	Cytoplasmiceffector	ref|WP_102813449.1|	80	396	8	64	57	30	2	5	1.8	monooxygenase [Bacillus megaterium]	tig00000003_pilon_C.paspali	2691590	2691832
g4341.t1	Y(0.948)	-	Cytoplasmiceffector	ref|WP_114324422.1|	80	396	8	64	57	30	2	5	1.7	monooxygenase [Bacillus sp. AG236]	tig00000003_pilon_C.paspali	2691590	2691832
g4341.t1	Y(0.948)	-	Cytoplasmiceffector	ref|WP_116075173.1|	80	396	8	64	57	30	2	5	2	monooxygenase [Bacillus megaterium]	tig00000003_pilon_C.paspali	2691590	2691832
g4341.t1	Y(0.948)	-	Cytoplasmiceffector	ref|WP_121944464.1|	80	396	8	64	57	30	2	5	1.9	monooxygenase [Bacillus megaterium]	tig00000003_pilon_C.paspali	2691590	2691832
g4341.t1	Y(0.948)	-	Cytoplasmiceffector	ref|WP_129706473.1|	80	396	8	64	57	31	2	5	6.3	monooxygenase [Bacillus megaterium]	tig00000003_pilon_C.paspali	2691590	2691832
g4341.t1	Y(0.948)	-	Cytoplasmiceffector	ref|WP_136790206.1|	80	396	8	64	57	30	2	5	1.6	monooxygenase [Bacillus megaterium]	tig00000003_pilon_C.paspali	2691590	2691832
g4395.t1	Y(0.922)	-	Cytoplasmiceffector	gb|KIH93573.1|	76	79	1	76	76	23	1	1	4.47e-29	hypothetical protein SPBR_09184 [Sporothrix brasiliensis 5110]	tig00000003_pilon_C.paspali	2864055	2864488
g4395.t1	Y(0.922)	-	Cytoplasmiceffector	gb|OTA62319.1|	76	76	1	76	76	25	0	0	1.69e-29	CHCH domain-containing protein [Hypoxylon sp. EC38]	tig00000003_pilon_C.paspali	2864055	2864488
g4395.t1	Y(0.922)	-	Cytoplasmiceffector	gb|PBP25389.1|	76	77	1	76	77	23	1	1	9.83e-29	hypothetical protein BUE80_DR003878 [Diplocarpon rosae]	tig00000003_pilon_C.paspali	2864055	2864488
g4395.t1	Y(0.922)	-	Cytoplasmiceffector	gb|PMD48194.1|	76	77	1	76	77	20	1	1	6.16e-32	hypothetical protein L207DRAFT_505233 [Hyaloscypha variabilis F]	tig00000003_pilon_C.paspali	2864055	2864488
g4395.t1	Y(0.922)	-	Cytoplasmiceffector	gb|PQE31008.1|	76	76	1	76	76	10	0	0	3.96e-31	CHCH domain-containing protein [Rutstroemia sp. NJR-2017a WRK4]	tig00000003_pilon_C.paspali	2864055	2864488
g4395.t1	Y(0.922)	-	Cytoplasmiceffector	gb|RYP89837.1|	76	77	1	76	77	20	1	1	6.51e-32	hypothetical protein DL770_004048 [Monosporascus sp. CRB-9-2]	tig00000003_pilon_C.paspali	2864055	2864488
g4395.t1	Y(0.922)	-	Cytoplasmiceffector	ref|XP_007707868.1|	76	77	8	76	69	21	0	0	1.13e-28	hypothetical protein COCCADRAFT_84326 [Bipolaris zeicola 26-R-13]	tig00000003_pilon_C.paspali	2864055	2864488
g4395.t1	Y(0.922)	-	Cytoplasmiceffector	ref|XP_009654556.1|	76	76	1	76	76	26	0	0	1.48e-28	hypothetical protein VDAG_07356 [Verticillium dahliae VdLs.17]	tig00000003_pilon_C.paspali	2864055	2864488
g4395.t1	Y(0.922)	-	Cytoplasmiceffector	ref|XP_022473486.1|	76	76	1	76	76	26	0	0	1.69e-28	hypothetical protein CORC01_08398 [Colletotrichum orchidophilum]	tig00000003_pilon_C.paspali	2864055	2864488
g4395.t1	Y(0.922)	-	Cytoplasmiceffector	ref|XP_024546333.1|	76	78	10	76	67	15	0	0	1.49e-31	Bccoa4 [Botrytis cinerea B05.10]	tig00000003_pilon_C.paspali	2864055	2864488
g4402.t1	Y(0.917)	-	Cytoplasmiceffector	emb|CCD45795.1|	159	156	9	145	137	80	2	2	6.96e-27	hypothetical protein BofuT4_P048130.1 [Botrytis cinerea T4]	tig00000003_pilon_C.paspali	2875405	2875884
g4402.t1	Y(0.917)	-	Cytoplasmiceffector	gb|EMR84435.1|	159	156	9	145	137	80	2	2	7.84e-27	hypothetical protein BcDW1_6945 [Botrytis cinerea BcDW1]	tig00000003_pilon_C.paspali	2875405	2875884
g4402.t1	Y(0.917)	-	Cytoplasmiceffector	gb|ESZ97976.1|	159	186	7	145	143	74	2	5	7e-32	hypothetical protein SBOR_1647 [Sclerotinia borealis F-4128]	tig00000003_pilon_C.paspali	2875405	2875884
g4402.t1	Y(0.917)	-	Cytoplasmiceffector	gb|TEY43659.1|	159	156	4	145	142	83	2	2	1.3e-24	hypothetical protein BOTCAL_0365g00110 [Botryotinia calthae]	tig00000003_pilon_C.paspali	2875405	2875884
g4402.t1	Y(0.917)	-	Cytoplasmiceffector	gb|TGO31325.1|	159	156	4	145	142	83	2	2	6.52e-27	hypothetical protein BPAE_0001g02250 [Botrytis paeoniae]	tig00000003_pilon_C.paspali	2875405	2875884
g4402.t1	Y(0.917)	-	Cytoplasmiceffector	gb|TGO65050.1|	159	150	4	145	142	86	2	2	1.62e-26	hypothetical protein BCON_0004g00470 [Botryotinia convoluta]	tig00000003_pilon_C.paspali	2875405	2875884
g4402.t1	Y(0.917)	-	Cytoplasmiceffector	gb|TGO66422.1|	159	156	5	154	150	88	3	3	1.08e-25	hypothetical protein BOTNAR_0061g00230 [Botryotinia narcissicola]	tig00000003_pilon_C.paspali	2875405	2875884
g4402.t1	Y(0.917)	-	Cytoplasmiceffector	gb|THV53184.1|	159	201	1	145	146	83	3	3	2.14e-28	hypothetical protein BGAL_0057g00240 [Botrytis galanthina]	tig00000003_pilon_C.paspali	2875405	2875884
g4402.t1	Y(0.917)	-	Cytoplasmiceffector	ref|XP_001561119.1|	159	156	4	145	142	84	2	2	4.46e-27	hypothetical protein BCIN_01g07470 [Botrytis cinerea B05.10]	tig00000003_pilon_C.paspali	2875405	2875884
g4402.t1	Y(0.917)	-	Cytoplasmiceffector	ref|XP_001594352.1|	159	156	8	152	145	83	3	3	4.27e-27	predicted protein [Sclerotinia sclerotiorum 1980 UF-70]	tig00000003_pilon_C.paspali	2875405	2875884
g4439.t1	Y(0.922)	Y(0.526)	Cytoplasmic/apoplasticeffector	gb|ESZ93272.1|	184	600	1	170	170	70	0	0	4.12e-63	CocE/NonD family hydrolase [Sclerotinia borealis F-4128]	tig00000003_pilon_C.paspali	2968119	2968673
g4439.t1	Y(0.922)	Y(0.526)	Cytoplasmic/apoplasticeffector	gb|OFE32851.1|	184	585	10	172	164	109	2	2	3.23e-20	hypothetical protein BBI12_20920 [Agrobacterium vitis]	tig00000003_pilon_C.paspali	2968119	2968673
g4439.t1	Y(0.922)	Y(0.526)	Cytoplasmic/apoplasticeffector	gb|OHZ08213.1|	184	596	10	172	164	109	2	2	3.15e-20	hypothetical protein BBK77_22790 [Agrobacterium vitis]	tig00000003_pilon_C.paspali	2968119	2968673
g4439.t1	Y(0.922)	Y(0.526)	Cytoplasmic/apoplasticeffector	gb|OHZ22881.1|	184	570	8	172	166	110	2	2	7.26e-22	hypothetical protein BBK91_10965 [Agrobacterium vitis]	tig00000003_pilon_C.paspali	2968119	2968673
g4439.t1	Y(0.922)	Y(0.526)	Cytoplasmic/apoplasticeffector	gb|OHZ41243.1|	184	570	8	172	166	110	2	2	6.99e-22	hypothetical protein BBL17_17145 [Agrobacterium vitis]	tig00000003_pilon_C.paspali	2968119	2968673
g4439.t1	Y(0.922)	Y(0.526)	Cytoplasmic/apoplasticeffector	ref|WP_015915348.1|	184	608	8	172	166	110	2	2	7.08e-22	CocE/NonD family hydrolase [Agrobacterium vitis]	tig00000003_pilon_C.paspali	2968119	2968673
g4439.t1	Y(0.922)	Y(0.526)	Cytoplasmic/apoplasticeffector	ref|WP_081341916.1|	184	608	10	172	164	109	2	2	3.01e-20	CocE/NonD family hydrolase [Agrobacterium vitis]	tig00000003_pilon_C.paspali	2968119	2968673
g4439.t1	Y(0.922)	Y(0.526)	Cytoplasmic/apoplasticeffector	ref|WP_081358842.1|	184	608	8	172	166	110	2	2	6.68e-22	CocE/NonD family hydrolase [Agrobacterium vitis]	tig00000003_pilon_C.paspali	2968119	2968673
g4439.t1	Y(0.922)	Y(0.526)	Cytoplasmic/apoplasticeffector	ref|WP_087727550.1|	184	608	8	172	166	110	2	2	2.67e-21	CocE/NonD family hydrolase [Agrobacterium vitis]	tig00000003_pilon_C.paspali	2968119	2968673
g4439.t1	Y(0.922)	Y(0.526)	Cytoplasmic/apoplasticeffector	ref|WP_109868033.1|	184	575	8	178	172	109	3	3	1.36e-20	CocE/NonD family hydrolase [Pseudomonas sp. RW410]	tig00000003_pilon_C.paspali	2968119	2968673
g4441.t1	Y(0.908)	-	Cytoplasmiceffector	emb|CCD45577.1|	105	80	28	105	80	14	1	2	7.57e-37	similar to complex 1 protein (LYR family) protein [Botrytis cinerea T4]	tig00000003_pilon_C.paspali	2969836	2970278
g4441.t1	Y(0.908)	-	Cytoplasmiceffector	gb|KIN03979.1|	105	76	29	104	76	18	0	0	9.8e-37	hypothetical protein OIDMADRAFT_18120, partial [Oidiodendron maius Zn]	tig00000003_pilon_C.paspali	2969836	2970278
g4441.t1	Y(0.908)	-	Cytoplasmiceffector	gb|PQE08114.1|	105	80	28	105	80	5	1	2	3.76e-44	Complex 1 LYR protein [Rutstroemia sp. NJR-2017a BVV2]	tig00000003_pilon_C.paspali	2969836	2970278
g4441.t1	Y(0.908)	-	Cytoplasmiceffector	gb|PQE12535.1|	105	95	28	105	95	7	1	17	7.02e-41	Complex 1 LYR protein [Rutstroemia sp. NJR-2017a BBW]	tig00000003_pilon_C.paspali	2969836	2970278
g4441.t1	Y(0.908)	-	Cytoplasmiceffector	gb|PQE28252.1|	105	95	28	105	95	7	1	17	1.46e-40	Complex 1 LYR protein [Rutstroemia sp. NJR-2017a WRK4]	tig00000003_pilon_C.paspali	2969836	2970278
g4441.t1	Y(0.908)	-	Cytoplasmiceffector	gb|TEY86483.1|	105	78	28	105	78	13	0	0	2.16e-39	hypothetical protein BOTCAL_0007g00100 [Botryotinia calthae]	tig00000003_pilon_C.paspali	2969836	2970278
g4441.t1	Y(0.908)	-	Cytoplasmiceffector	gb|TGO08359.1|	105	78	28	105	78	13	0	0	5.42e-40	hypothetical protein BTUL_0213g00160 [Botrytis tulipae]	tig00000003_pilon_C.paspali	2969836	2970278
g4441.t1	Y(0.908)	-	Cytoplasmiceffector	gb|TGO31125.1|	105	78	28	105	78	14	0	0	4.35e-39	hypothetical protein BPAE_0001g00190 [Botrytis paeoniae]	tig00000003_pilon_C.paspali	2969836	2970278
g4441.t1	Y(0.908)	-	Cytoplasmiceffector	gb|TGO65936.1|	105	78	28	105	78	14	0	0	2.41e-39	hypothetical protein BOTNAR_0072g00100 [Botryotinia narcissicola]	tig00000003_pilon_C.paspali	2969836	2970278
g4441.t1	Y(0.908)	-	Cytoplasmiceffector	ref|XP_024546359.1|	105	78	28	105	78	14	0	0	7.29e-39	Bcsdh6 [Botrytis cinerea B05.10]	tig00000003_pilon_C.paspali	2969836	2970278
g4461.t1	Y(0.944)	-	Cytoplasmiceffector	gb|APA13832.1|	207	207	1	207	207	29	0	0	1.47e-130	hypothetical protein sscle_11g086020 [Sclerotinia sclerotiorum 1980 UF-70]	tig00000003_pilon_C.paspali	3023702	3024375
g4461.t1	Y(0.944)	-	Cytoplasmiceffector	gb|PQE08090.1|	207	197	11	207	197	9	0	0	1.18e-136	hypothetical protein CJF31_00008165 [Rutstroemia sp. NJR-2017a BVV2]	tig00000003_pilon_C.paspali	3023702	3024375
g4461.t1	Y(0.944)	-	Cytoplasmiceffector	gb|PQE12503.1|	207	207	1	207	207	5	0	0	1.54e-146	hypothetical protein CJF30_00002366 [Rutstroemia sp. NJR-2017a BBW]	tig00000003_pilon_C.paspali	3023702	3024375
g4461.t1	Y(0.944)	-	Cytoplasmiceffector	gb|PQE21965.1|	207	207	1	207	207	6	0	0	1.24e-146	hypothetical protein CJF32_00009957 [Rutstroemia sp. NJR-2017a WRK4]	tig00000003_pilon_C.paspali	3023702	3024375
g4461.t1	Y(0.944)	-	Cytoplasmiceffector	gb|TGO14651.1|	207	207	1	207	207	31	0	0	9.48e-130	hypothetical protein BTUL_0050g00460 [Botrytis tulipae]	tig00000003_pilon_C.paspali	3023702	3024375
g4461.t1	Y(0.944)	-	Cytoplasmiceffector	gb|TGO22881.1|	207	207	1	207	207	33	0	0	5.55e-128	hypothetical protein BPAE_0151g00090 [Botrytis paeoniae]	tig00000003_pilon_C.paspali	3023702	3024375
g4461.t1	Y(0.944)	-	Cytoplasmiceffector	gb|TGO45248.1|	207	207	1	207	207	31	0	0	3.86e-129	hypothetical protein BCON_0409g00040 [Botryotinia convoluta]	tig00000003_pilon_C.paspali	3023702	3024375
g4461.t1	Y(0.944)	-	Cytoplasmiceffector	gb|TGO87946.1|	207	207	1	207	207	32	0	0	6.75e-129	hypothetical protein BPOR_0194g00170 [Botrytis porri]	tig00000003_pilon_C.paspali	3023702	3024375
g4461.t1	Y(0.944)	-	Cytoplasmiceffector	gb|THV49039.1|	207	207	1	207	207	32	0	0	3.35e-128	hypothetical protein BGAL_0214g00080 [Botrytis galanthina]	tig00000003_pilon_C.paspali	3023702	3024375
g4461.t1	Y(0.944)	-	Cytoplasmiceffector	ref|XP_024553459.1|	207	207	1	207	207	29	0	0	1.26e-129	hypothetical protein BCIN_15g04590 [Botrytis cinerea B05.10]	tig00000003_pilon_C.paspali	3023702	3024375
g4469.t1	Y(0.904)	-	Cytoplasmiceffector	ref|XP_001323390.1|	149	2378	35	110	79	48	3	5	2.1	Clan CA, family C19, ubiquitin hydrolase-like cysteine peptidase [Trichomonas vaginalis G3]	tig00000003_pilon_C.paspali	3039738	3040294
g4520.t1	Y(0.901)	-	Cytoplasmiceffector	emb|CZT11758.1|	171	171	6	81	76	29	1	9	2.62e-15	uncharacterized protein RAG0_15817 [Rhynchosporium agropyri]	tig00000003_pilon_C.paspali	3240589	3241479
g4520.t1	Y(0.901)	-	Cytoplasmiceffector	emb|CZT11845.1|	171	171	6	81	76	29	1	9	3.41e-15	uncharacterized protein RCO7_07470 [Rhynchosporium commune]	tig00000003_pilon_C.paspali	3240589	3241479
g4520.t1	Y(0.901)	-	Cytoplasmiceffector	emb|CZT48937.1|	171	171	6	81	76	27	1	9	8.06e-17	uncharacterized protein RSE6_09707 [Rhynchosporium secalis]	tig00000003_pilon_C.paspali	3240589	3241479
g4520.t1	Y(0.901)	-	Cytoplasmiceffector	gb|PVH80953.1|	171	207	5	84	80	31	1	8	2.7e-18	hypothetical protein DL98DRAFT_531708 [Cadophora sp. DSE1049]	tig00000003_pilon_C.paspali	3240589	3241479
g4520.t1	Y(0.901)	-	Cytoplasmiceffector	gb|RDL34002.1|	171	136	9	107	110	50	2	14	6.58e-14	hypothetical protein BP5553_08370 [Phialophora cf. hyalina BP 5553]	tig00000003_pilon_C.paspali	3240589	3241479
g4520.t1	Y(0.901)	-	Cytoplasmiceffector	gb|RDW88087.1|	171	194	2	90	89	53	0	0	3.71e-15	hypothetical protein BP6252_00119 [Coleophoma cylindrospora]	tig00000003_pilon_C.paspali	3240589	3241479
g4520.t1	Y(0.901)	-	Cytoplasmiceffector	gb|RDW95336.1|	171	192	2	93	110	44	2	18	6.37e-19	hypothetical protein BP5796_01099 [Coleophoma crateriformis]	tig00000003_pilon_C.paspali	3240589	3241479
g4520.t1	Y(0.901)	-	Cytoplasmiceffector	ref|XP_007293522.1|	171	172	6	139	146	70	3	21	2.49e-18	hypothetical protein MBM_05633 [Marssonina brunnea f. sp. 'multigermtubi' MB_m1]	tig00000003_pilon_C.paspali	3240589	3241479
g4520.t1	Y(0.901)	-	Cytoplasmiceffector	ref|XP_024717465.1|	171	163	7	117	125	50	4	20	2.21e-19	hypothetical protein M430DRAFT_22527 [Amorphotheca resinae ATCC 22711]	tig00000003_pilon_C.paspali	3240589	3241479
g4520.t1	Y(0.901)	-	Cytoplasmiceffector	ref|XP_024733188.1|	171	223	8	68	61	26	0	0	1.46e-14	hypothetical protein K444DRAFT_632708 [Meliniomyces bicolor E]	tig00000003_pilon_C.paspali	3240589	3241479
g4527.t1	Y(0.92)	-	Cytoplasmiceffector	dbj|GAQ47403.1|	152	153	1	150	151	74	1	1	2.02e-44	fatty acid desaturase, putative [Aspergillus niger]	tig00000004_pilon_C.paspali	28967	29425
g4527.t1	Y(0.92)	-	Cytoplasmiceffector	gb|KJK63931.1|	152	160	1	152	163	34	3	14	3.92e-76	Cytochrome b5-like Heme/Steroid binding domain protein [Aspergillus parasiticus SU-1]	tig00000004_pilon_C.paspali	28967	29425
g4527.t1	Y(0.92)	-	Cytoplasmiceffector	gb|OBT70784.1|	152	158	1	150	157	65	5	12	4.91e-41	hypothetical protein VF21_10089 [Pseudogymnoascus sp. 05NY08]	tig00000004_pilon_C.paspali	28967	29425
g4527.t1	Y(0.92)	-	Cytoplasmiceffector	gb|OJJ69692.1|	152	160	1	152	163	35	3	14	3.44e-75	hypothetical protein ASPBRDRAFT_46049 [Aspergillus brasiliensis CBS 101740]	tig00000004_pilon_C.paspali	28967	29425
g4527.t1	Y(0.92)	-	Cytoplasmiceffector	gb|OJZ80602.1|	152	154	1	150	151	77	1	1	5.27e-45	hypothetical protein ASPFODRAFT_52804 [Aspergillus luchuensis CBS 106.47]	tig00000004_pilon_C.paspali	28967	29425
g4527.t1	Y(0.92)	-	Cytoplasmiceffector	gb|OQE01428.1|	152	167	1	147	165	51	3	20	5.16e-59	hypothetical protein PENSOL_c004G06787 [Penicillium solitum]	tig00000004_pilon_C.paspali	28967	29425
g4527.t1	Y(0.92)	-	Cytoplasmiceffector	gb|RAQ40884.1|	152	159	1	152	160	38	3	9	3.63e-75	fatty acid desaturase [Aspergillus flavus]	tig00000004_pilon_C.paspali	28967	29425
g4527.t1	Y(0.92)	-	Cytoplasmiceffector	gb|RAQ60931.1|	152	160	1	152	163	36	3	14	7e-74	fatty acid desaturase [Aspergillus flavus]	tig00000004_pilon_C.paspali	28967	29425
g4527.t1	Y(0.92)	-	Cytoplasmiceffector	gb|RMZ39602.1|	152	160	1	152	163	37	3	14	2.14e-73	fatty acid desaturase [Aspergillus flavus]	tig00000004_pilon_C.paspali	28967	29425
g4527.t1	Y(0.92)	-	Cytoplasmiceffector	ref|XP_002381651.1|	152	159	1	152	160	39	3	9	3.96e-74	fatty acid desaturase, putative [Aspergillus flavus NRRL3357]	tig00000004_pilon_C.paspali	28967	29425
g452.t1	Y(0.924)	-	Cytoplasmiceffector	gb|ESZ90756.1|	117	116	1	116	116	13	0	0	3.21e-70	hypothetical protein SBOR_8869 [Sclerotinia borealis F-4128]	tig00000001_pilon_C.paspali	1258728	1259468
g452.t1	Y(0.924)	-	Cytoplasmiceffector	gb|PQE25431.1|	117	148	1	117	148	6	1	31	7.78e-68	alpha beta fold family hydrolase protein [Rutstroemia sp. NJR-2017a BBW]	tig00000001_pilon_C.paspali	1258728	1259468
g452.t1	Y(0.924)	-	Cytoplasmiceffector	gb|PQE30386.1|	117	117	1	117	117	7	0	0	1.69e-73	alpha beta fold family protein [Rutstroemia sp. NJR-2017a WRK4]	tig00000001_pilon_C.paspali	1258728	1259468
g452.t1	Y(0.924)	-	Cytoplasmiceffector	gb|RAL67319.1|	117	164	5	117	113	11	0	0	4.49e-67	hypothetical protein DID88_008081 [Monilinia fructigena]	tig00000001_pilon_C.paspali	1258728	1259468
g452.t1	Y(0.924)	-	Cytoplasmiceffector	gb|TEY52527.1|	117	117	1	117	117	9	0	0	1.36e-72	hypothetical protein BOTCAL_0256g00030 [Botryotinia calthae]	tig00000001_pilon_C.paspali	1258728	1259468
g452.t1	Y(0.924)	-	Cytoplasmiceffector	gb|TGO14139.1|	117	117	1	117	117	8	0	0	4.83e-73	hypothetical protein BTUL_0057g00050 [Botrytis tulipae]	tig00000001_pilon_C.paspali	1258728	1259468
g452.t1	Y(0.924)	-	Cytoplasmiceffector	gb|TGO54388.1|	117	126	1	117	117	10	0	0	1.03e-71	hypothetical protein BCON_0108g00280 [Botryotinia convoluta]	tig00000001_pilon_C.paspali	1258728	1259468
g452.t1	Y(0.924)	-	Cytoplasmiceffector	gb|TGO77865.1|	117	117	1	117	117	10	0	0	1.14e-71	hypothetical protein BELL_0088g00160 [Botrytis elliptica]	tig00000001_pilon_C.paspali	1258728	1259468
g452.t1	Y(0.924)	-	Cytoplasmiceffector	gb|TGO90693.1|	117	117	1	117	117	8	0	0	4.89e-73	hypothetical protein BPOR_0054g00040 [Botrytis porri]	tig00000001_pilon_C.paspali	1258728	1259468
g452.t1	Y(0.924)	-	Cytoplasmiceffector	ref|XP_001554768.1|	117	117	1	117	117	11	0	0	1.95e-71	hypothetical protein BCIN_13g05430 [Botrytis cinerea B05.10]	tig00000001_pilon_C.paspali	1258728	1259468
g4539.t1	Y(0.919)	-	Cytoplasmiceffector	gb|KIM99242.1|	184	491	4	174	179	67	1	8	6.42e-62	hypothetical protein OIDMADRAFT_127026 [Oidiodendron maius Zn]	tig00000004_pilon_C.paspali	247928	248482
g4539.t1	Y(0.919)	-	Cytoplasmiceffector	gb|OTA64294.1|	184	497	2	174	181	77	2	8	4.82e-55	F-box domain protein [Hypoxylon sp. EC38]	tig00000004_pilon_C.paspali	247928	248482
g4539.t1	Y(0.919)	-	Cytoplasmiceffector	gb|OTA97017.1|	184	497	2	174	181	76	2	8	2.38e-56	hypothetical protein M434DRAFT_392202 [Hypoxylon sp. CO27-5]	tig00000004_pilon_C.paspali	247928	248482
g4539.t1	Y(0.919)	-	Cytoplasmiceffector	gb|PGH16527.1|	184	261	2	180	182	83	2	5	2.79e-53	hypothetical protein AJ79_01632 [Helicocarpus griseus UAMH5409]	tig00000004_pilon_C.paspali	247928	248482
g4539.t1	Y(0.919)	-	Cytoplasmiceffector	gb|PMD22391.1|	184	465	2	184	183	85	3	8	1.84e-52	F-box domain protein [Pezoloma ericae]	tig00000004_pilon_C.paspali	247928	248482
g4539.t1	Y(0.919)	-	Cytoplasmiceffector	gb|PQE08994.1|	184	473	2	180	179	11	0	0	1.21e-116	f-box domain protein [Rutstroemia sp. NJR-2017a WRK4]	tig00000004_pilon_C.paspali	247928	248482
g4539.t1	Y(0.919)	-	Cytoplasmiceffector	gb|PQE23263.1|	184	480	2	184	183	14	0	0	2.88e-116	F-box domain protein [Rutstroemia sp. NJR-2017a BVV2]	tig00000004_pilon_C.paspali	247928	248482
g4539.t1	Y(0.919)	-	Cytoplasmiceffector	gb|TGJ86906.1|	184	402	2	178	185	77	1	8	1.24e-55	hypothetical protein E0Z10_g1919 [Xylaria hypoxylon]	tig00000004_pilon_C.paspali	247928	248482
g4539.t1	Y(0.919)	-	Cytoplasmiceffector	ref|XP_015404852.1|	184	479	2	182	181	75	4	7	1.67e-52	hypothetical protein ANOM_008343 [Aspergillus nomius NRRL 13137]	tig00000004_pilon_C.paspali	247928	248482
g4539.t1	Y(0.919)	-	Cytoplasmiceffector	ref|XP_022398266.1|	184	458	2	171	171	70	2	3	2.68e-52	hypothetical protein ASPGLDRAFT_68470 [Aspergillus glaucus CBS 516.65]	tig00000004_pilon_C.paspali	247928	248482
g460.t1	Y(0.905)	-	Cytoplasmiceffector	gb|ALE76003.1|	78	258	42	75	34	17	0	0	1.6	hypothetical protein FRP1_04435 [Pseudonocardia sp. EC080625-04]	tig00000001_pilon_C.paspali	1294664	1294900
g460.t1	Y(0.905)	-	Cytoplasmiceffector	gb|TFJ86186.1|	78	339	9	70	62	43	0	0	8.5	hypothetical protein NSK_002394 [Nannochloropsis salina CCMP1776]	tig00000001_pilon_C.paspali	1294664	1294900
g460.t1	Y(0.905)	-	Cytoplasmiceffector	ref|WP_082399315.1|	78	337	42	75	34	17	0	0	1.9	MULTISPECIES: site-specific integrase [Pseudonocardia]	tig00000001_pilon_C.paspali	1294664	1294900
g4613.t1	Y(0.906)	-	Cytoplasmiceffector	emb|CAP32032.2|	543	766	463	531	69	36	2	3	9.42e-07	Protein CBR-MIB-1 [Caenorhabditis briggsae]	tig00000004_pilon_C.paspali	478584	480215
g4613.t1	Y(0.906)	-	Cytoplasmiceffector	gb|OJJ51890.1|	543	468	332	536	205	101	5	50	1.84e-08	hypothetical protein ASPSYDRAFT_847697 [Aspergillus sydowii CBS 593.65]	tig00000004_pilon_C.paspali	478584	480215
g4613.t1	Y(0.906)	-	Cytoplasmiceffector	gb|OJJ52307.1|	543	468	332	536	205	102	5	50	6.21e-08	hypothetical protein ASPSYDRAFT_712959 [Aspergillus sydowii CBS 593.65]	tig00000004_pilon_C.paspali	478584	480215
g4613.t1	Y(0.906)	-	Cytoplasmiceffector	gb|OJJ62687.1|	543	435	282	536	259	135	8	57	6.36e-11	hypothetical protein ASPSYDRAFT_1168217 [Aspergillus sydowii CBS 593.65]	tig00000004_pilon_C.paspali	478584	480215
g4613.t1	Y(0.906)	-	Cytoplasmiceffector	gb|PIC42860.1|	543	766	463	531	69	36	2	3	9.83e-07	hypothetical protein B9Z55_009800 [Caenorhabditis nigoni]	tig00000004_pilon_C.paspali	478584	480215
g4613.t1	Y(0.906)	-	Cytoplasmiceffector	gb|TDH10132.1|	543	382	400	532	164	84	8	34	3.78e-05	hypothetical protein EPR50_G00071890 [Perca flavescens]	tig00000004_pilon_C.paspali	478584	480215
g4613.t1	Y(0.906)	-	Cytoplasmiceffector	ref|XP_002641354.1|	543	757	463	531	69	36	2	3	1.04e-06	Hypothetical protein CBG13208 [Caenorhabditis briggsae]	tig00000004_pilon_C.paspali	478584	480215
g4613.t1	Y(0.906)	-	Cytoplasmiceffector	ref|XP_008860232.1|	543	152	484	535	53	28	2	2	2.5e-05	zinc finger domain containing protein [Entamoeba nuttalli P19]	tig00000004_pilon_C.paspali	478584	480215
g4613.t1	Y(0.906)	-	Cytoplasmiceffector	ref|XP_028439724.1|	543	352	400	532	164	84	8	34	2.19e-05	mitochondrial ubiquitin ligase activator of NFKB 1 [Perca flavescens]	tig00000004_pilon_C.paspali	478584	480215
g4613.t1	Y(0.906)	-	Cytoplasmiceffector	ref|XP_654259.2|	543	152	484	535	53	28	2	2	2.59e-05	zinc finger domain containing protein [Entamoeba histolytica HM-1:IMSS]	tig00000004_pilon_C.paspali	478584	480215
g4633.t1	Y(0.908)	-	Cytoplasmiceffector	gb|KZL65057.1|	136	168	1	136	136	2	0	0	1.37e-91	histone H3, partial [Colletotrichum tofieldiae]	tig00000004_pilon_C.paspali	737720	738349
g4633.t1	Y(0.908)	-	Cytoplasmiceffector	gb|OAA55970.1|	136	136	1	135	135	1	0	0	1.9e-91	histone H3 [Sporothrix insectorum RCEF 264]	tig00000004_pilon_C.paspali	737720	738349
g4633.t1	Y(0.908)	-	Cytoplasmiceffector	gb|OQN99754.1|	136	136	1	135	135	1	0	0	1.86e-91	histone H3 [Rachicladosporium antarcticum]	tig00000004_pilon_C.paspali	737720	738349
g4633.t1	Y(0.908)	-	Cytoplasmiceffector	gb|RMY29011.1|	136	135	1	135	135	0	0	0	8.33e-92	hypothetical protein D0864_17015, partial [Hortaea werneckii]	tig00000004_pilon_C.paspali	737720	738349
g4633.t1	Y(0.908)	-	Cytoplasmiceffector	gb|TGO46980.1|	136	136	1	136	136	2	0	0	1.88e-91	hypothetical protein BOTNAR_0552g00050 [Botryotinia narcissicola]	tig00000004_pilon_C.paspali	737720	738349
g4633.t1	Y(0.908)	-	Cytoplasmiceffector	ref|NP_001106556.1|	136	136	1	135	135	0	0	0	6.77e-92	histone cluster 1, H3g protein [Xenopus tropicalis]	tig00000004_pilon_C.paspali	737720	738349
g4633.t1	Y(0.908)	-	Cytoplasmiceffector	ref|WP_069696828.1|	136	136	1	136	136	2	0	0	1.44e-91	histone H3 [Arthrobacter sp. D2]	tig00000004_pilon_C.paspali	737720	738349
g4633.t1	Y(0.908)	-	Cytoplasmiceffector	ref|WP_079863869.1|	136	136	1	136	136	0	0	0	9.92e-93	histone H3 [Acinetobacter baumannii]	tig00000004_pilon_C.paspali	737720	738349
g4633.t1	Y(0.908)	-	Cytoplasmiceffector	ref|WP_106439286.1|	136	146	1	136	136	2	0	0	1.63e-91	MULTISPECIES: histone H3 [Acinetobacter calcoaceticus/baumannii complex]	tig00000004_pilon_C.paspali	737720	738349
g4633.t1	Y(0.908)	-	Cytoplasmiceffector	ref|XP_001210672.1|	136	136	1	135	135	1	0	0	2.07e-91	histone H3 [Aspergillus terreus NIH2624]	tig00000004_pilon_C.paspali	737720	738349
g4679.t1	Y(0.957)	-	Cytoplasmiceffector	gb|ODT10747.1|	96	214	43	90	48	32	0	0	5	hypothetical protein ABS61_06920 [Microbacterium sp. SCN 70-18]	tig00000004_pilon_C.paspali	873438	873728
g4679.t1	Y(0.957)	-	Cytoplasmiceffector	gb|TFG22909.1|	96	615	16	95	80	53	2	2	9.8	hypothetical protein EU529_08985 [Candidatus Lokiarchaeota archaeon]	tig00000004_pilon_C.paspali	873438	873728
g4679.t1	Y(0.957)	-	Cytoplasmiceffector	ref|WP_004425235.1|	96	375	9	78	72	41	2	6	1.3	ABC transporter permease [Mycoplasma auris]	tig00000004_pilon_C.paspali	873438	873728
g4679.t1	Y(0.957)	-	Cytoplasmiceffector	ref|WP_053548160.1|	96	214	45	90	46	30	0	0	6	TetR/AcrR family transcriptional regulator [Microbacterium chocolatum]	tig00000004_pilon_C.paspali	873438	873728
g4679.t1	Y(0.957)	-	Cytoplasmiceffector	ref|WP_134090443.1|	96	792	11	72	62	41	1	1	9.8	PAS domain S-box protein [Olivibacter sp. XZL3]	tig00000004_pilon_C.paspali	873438	873728
g4700.t1	Y(0.985)	-	Cytoplasmiceffector	gb|PQE15275.1|	171	159	17	171	155	20	0	0	9.05e-98	cytochrome p450 protein [Rutstroemia sp. NJR-2017a BVV2]	tig00000004_pilon_C.paspali	933986	934501
g4700.t1	Y(0.985)	-	Cytoplasmiceffector	gb|PQE18329.1|	171	150	22	171	150	26	0	0	1.32e-89	cytochrome p450 protein [Rutstroemia sp. NJR-2017a BBW]	tig00000004_pilon_C.paspali	933986	934501
g4700.t1	Y(0.985)	-	Cytoplasmiceffector	gb|PQE28329.1|	171	173	9	171	163	28	0	0	1.22e-96	cytochrome p450 protein [Rutstroemia sp. NJR-2017a WRK4]	tig00000004_pilon_C.paspali	933986	934501
g4700.t1	Y(0.985)	-	Cytoplasmiceffector	gb|RFU33338.1|	171	149	22	171	150	57	2	2	1.33e-58	hypothetical protein B7463_g3032, partial [Scytalidium lignicola]	tig00000004_pilon_C.paspali	933986	934501
g4700.t1	Y(0.985)	-	Cytoplasmiceffector	gb|THX58636.1|	171	185	22	159	139	62	1	1	7.64e-48	hypothetical protein D6D06_02747 [Aureobasidium pullulans]	tig00000004_pilon_C.paspali	933986	934501
g4700.t1	Y(0.985)	-	Cytoplasmiceffector	gb|THZ10236.1|	171	185	22	159	139	62	1	1	7.29e-47	hypothetical protein D6C95_00711 [Aureobasidium pullulans]	tig00000004_pilon_C.paspali	933986	934501
g4700.t1	Y(0.985)	-	Cytoplasmiceffector	gb|TKA76110.1|	171	151	22	163	142	53	1	1	3.58e-59	hypothetical protein B0A49_03511 [Cryomyces minteri]	tig00000004_pilon_C.paspali	933986	934501
g4700.t1	Y(0.985)	-	Cytoplasmiceffector	gb|TKA78999.1|	171	151	22	163	142	52	1	1	7.65e-60	hypothetical protein B0A49_01550 [Cryomyces minteri]	tig00000004_pilon_C.paspali	933986	934501
g4700.t1	Y(0.985)	-	Cytoplasmiceffector	ref|XP_008076422.1|	171	194	12	171	162	70	3	4	5.44e-51	hypothetical protein GLAREA_09270 [Glarea lozoyensis ATCC 20868]	tig00000004_pilon_C.paspali	933986	934501
g4700.t1	Y(0.985)	-	Cytoplasmiceffector	ref|XP_018075611.1|	171	149	28	171	144	59	2	2	1.69e-52	hypothetical protein LY89DRAFT_681836 [Phialocephala scopiformis]	tig00000004_pilon_C.paspali	933986	934501
g4756.t1	Y(0.921)	-	Cytoplasmiceffector	gb|APA10922.1|	164	158	17	164	148	32	2	5	5.61e-71	hypothetical protein sscle_07g056920 [Sclerotinia sclerotiorum 1980 UF-70]	tig00000009_pilon_C.paspali	46664	47783
g4756.t1	Y(0.921)	-	Cytoplasmiceffector	gb|PQE17846.1|	164	138	34	164	131	4	0	0	1.3e-87	ethanolamine utilization protein [Rutstroemia sp. NJR-2017a BBW]	tig00000009_pilon_C.paspali	46664	47783
g4756.t1	Y(0.921)	-	Cytoplasmiceffector	gb|RDW67010.1|	164	136	34	164	131	23	1	2	8.18e-69	hypothetical protein BP5796_09759 [Coleophoma crateriformis]	tig00000009_pilon_C.paspali	46664	47783
g4756.t1	Y(0.921)	-	Cytoplasmiceffector	gb|TAQ88835.1|	164	139	31	164	134	26	1	2	3.63e-68	hypothetical protein B7494_g2851 [Chlorociboria aeruginascens]	tig00000009_pilon_C.paspali	46664	47783
g4756.t1	Y(0.921)	-	Cytoplasmiceffector	gb|TGO10916.1|	164	118	45	164	120	15	1	2	2.22e-68	hypothetical protein BTUL_0122g00280 [Botrytis tulipae]	tig00000009_pilon_C.paspali	46664	47783
g4756.t1	Y(0.921)	-	Cytoplasmiceffector	gb|TGO73590.1|	164	118	45	164	120	14	1	2	1.34e-68	hypothetical protein BELL_0348g00050 [Botrytis elliptica]	tig00000009_pilon_C.paspali	46664	47783
g4756.t1	Y(0.921)	-	Cytoplasmiceffector	ref|XP_001595304.1|	164	138	29	164	139	25	2	5	5.77e-71	hypothetical protein SS1G_03393 [Sclerotinia sclerotiorum 1980 UF-70]	tig00000009_pilon_C.paspali	46664	47783
g4756.t1	Y(0.921)	-	Cytoplasmiceffector	ref|XP_018062594.1|	164	136	21	164	144	23	2	10	1.23e-70	hypothetical protein LY89DRAFT_701957 [Phialocephala scopiformis]	tig00000009_pilon_C.paspali	46664	47783
g4756.t1	Y(0.921)	-	Cytoplasmiceffector	ref|XP_018186334.1|	164	117	48	164	117	16	0	0	3.6e-69	hypothetical protein L228DRAFT_249595 [Xylona heveae TC161]	tig00000009_pilon_C.paspali	46664	47783
g4756.t1	Y(0.921)	-	Cytoplasmiceffector	ref|XP_024719503.1|	164	120	45	164	120	19	0	0	2.62e-69	hypothetical protein M430DRAFT_254284 [Amorphotheca resinae ATCC 22711]	tig00000009_pilon_C.paspali	46664	47783
g4837.t1	Y(0.922)	-	Cytoplasmiceffector	gb|ESZ95282.1|	217	217	1	217	217	6	0	0	6.26e-154	60S ribosomal protein L10a [Sclerotinia borealis F-4128]	tig00000012_pilon_C.paspali	133245	134102
g4837.t1	Y(0.922)	-	Cytoplasmiceffector	gb|KIN06250.1|	217	217	1	217	217	3	0	0	2.09e-155	hypothetical protein OIDMADRAFT_49742 [Oidiodendron maius Zn]	tig00000012_pilon_C.paspali	133245	134102
g4837.t1	Y(0.922)	-	Cytoplasmiceffector	gb|PQE11990.1|	217	217	1	217	217	0	0	0	4.06e-157	ribosomal L1p L10e family protein [Rutstroemia sp. NJR-2017a BVV2]	tig00000012_pilon_C.paspali	133245	134102
g4837.t1	Y(0.922)	-	Cytoplasmiceffector	gb|PVH78617.1|	217	217	1	217	217	5	0	0	5.19e-154	60S ribosomal protein L1 [Cadophora sp. DSE1049]	tig00000012_pilon_C.paspali	133245	134102
g4837.t1	Y(0.922)	-	Cytoplasmiceffector	gb|RDL34973.1|	217	217	1	217	217	6	0	0	2.81e-154	Ribosomal protein [Phialophora cf. hyalina BP 5553]	tig00000012_pilon_C.paspali	133245	134102
g4837.t1	Y(0.922)	-	Cytoplasmiceffector	gb|RDW69953.1|	217	217	1	217	217	3	0	0	1.12e-155	ribosomal protein [Coleophoma crateriformis]	tig00000012_pilon_C.paspali	133245	134102
g4837.t1	Y(0.922)	-	Cytoplasmiceffector	ref|XP_001559318.1|	217	217	1	217	217	2	0	0	2.2e-155	hypothetical protein BCIN_03g01820 [Botrytis cinerea B05.10]	tig00000012_pilon_C.paspali	133245	134102
g4837.t1	Y(0.922)	-	Cytoplasmiceffector	ref|XP_001598446.1|	217	217	1	217	217	1	0	0	5.78e-156	60S ribosomal protein L1 [Sclerotinia sclerotiorum 1980 UF-70]	tig00000012_pilon_C.paspali	133245	134102
g4837.t1	Y(0.922)	-	Cytoplasmiceffector	ref|XP_024721133.1|	217	217	1	217	217	3	0	0	7.37e-155	hypothetical protein M430DRAFT_66777 [Amorphotheca resinae ATCC 22711]	tig00000012_pilon_C.paspali	133245	134102
g4837.t1	Y(0.922)	-	Cytoplasmiceffector	ref|XP_024741911.1|	217	217	1	217	217	4	0	0	3.46e-154	60S ribosomal protein L1 [Meliniomyces bicolor E]	tig00000012_pilon_C.paspali	133245	134102
g4983.t1	Y(0.956)	-	Cytoplasmiceffector	gb|ESZ98359.1|	112	106	36	112	79	25	2	4	3.9e-17	hypothetical protein SBOR_1237 [Sclerotinia borealis F-4128]	tig00000012_pilon_C.paspali	911849	912187
g4983.t1	Y(0.956)	-	Cytoplasmiceffector	gb|PQE04492.1|	112	114	1	104	111	42	2	7	6.28e-30	hypothetical protein CJF31_00007337 [Rutstroemia sp. NJR-2017a BVV2]	tig00000012_pilon_C.paspali	911849	912187
g4983.t1	Y(0.956)	-	Cytoplasmiceffector	gb|PQE24920.1|	112	119	1	112	119	39	2	7	4.06e-42	hypothetical protein CJF32_00007304 [Rutstroemia sp. NJR-2017a WRK4]	tig00000012_pilon_C.paspali	911849	912187
g4983.t1	Y(0.956)	-	Cytoplasmiceffector	gb|PQE28235.1|	112	119	1	112	119	38	2	7	3.06e-43	hypothetical protein CJF30_00010905 [Rutstroemia sp. NJR-2017a BBW]	tig00000012_pilon_C.paspali	911849	912187
g4983.t1	Y(0.956)	-	Cytoplasmiceffector	gb|TGO26279.1|	112	100	39	112	74	25	1	2	4.46e-17	hypothetical protein BPAE_0063g00480 [Botrytis paeoniae]	tig00000012_pilon_C.paspali	911849	912187
g4983.t1	Y(0.956)	-	Cytoplasmiceffector	gb|TGO64037.1|	112	100	31	112	83	29	2	3	6.45e-20	hypothetical protein BCON_0009g00460 [Botryotinia convoluta]	tig00000012_pilon_C.paspali	911849	912187
g4983.t1	Y(0.956)	-	Cytoplasmiceffector	gb|TGO76984.1|	112	100	31	112	83	29	2	3	2.15e-25	hypothetical protein BELL_0128g00100 [Botrytis elliptica]	tig00000012_pilon_C.paspali	911849	912187
g4983.t1	Y(0.956)	-	Cytoplasmiceffector	gb|TGO89527.1|	112	216	30	112	84	29	2	3	7.83e-23	hypothetical protein BPOR_0105g00110 [Botrytis porri]	tig00000012_pilon_C.paspali	911849	912187
g4983.t1	Y(0.956)	-	Cytoplasmiceffector	gb|THV52791.1|	112	102	30	112	84	33	1	1	1.84e-20	hypothetical protein BGAL_0068g00100 [Botrytis galanthina]	tig00000012_pilon_C.paspali	911849	912187
g4983.t1	Y(0.956)	-	Cytoplasmiceffector	ref|XP_001595085.1|	112	104	38	112	75	26	1	2	1.57e-16	predicted protein [Sclerotinia sclerotiorum 1980 UF-70]	tig00000012_pilon_C.paspali	911849	912187
g5020.t1	Y(0.915)	-	Cytoplasmiceffector	gb|PQE04486.1|	355	354	1	355	355	23	1	1	0	KRR1 small subunit processome component protein [Rutstroemia sp. NJR-2017a BVV2]	tig00000012_pilon_C.paspali	1031237	1032304
g5020.t1	Y(0.915)	-	Cytoplasmiceffector	gb|PQE09551.1|	355	354	1	355	355	36	1	1	0	KRR1 small subunit processome component protein [Rutstroemia sp. NJR-2017a BBW]	tig00000012_pilon_C.paspali	1031237	1032304
g5020.t1	Y(0.915)	-	Cytoplasmiceffector	gb|PQE24913.1|	355	354	1	355	355	34	1	1	0	KRR1 small subunit processome component protein [Rutstroemia sp. NJR-2017a WRK4]	tig00000012_pilon_C.paspali	1031237	1032304
g5020.t1	Y(0.915)	-	Cytoplasmiceffector	gb|TGO09048.1|	355	353	1	353	353	89	0	0	0	hypothetical protein BTUL_0181g00090 [Botrytis tulipae]	tig00000012_pilon_C.paspali	1031237	1032304
g5020.t1	Y(0.915)	-	Cytoplasmiceffector	gb|TGO22296.1|	355	353	1	353	353	91	0	0	0	hypothetical protein BPAE_0174g00170 [Botrytis paeoniae]	tig00000012_pilon_C.paspali	1031237	1032304
g5020.t1	Y(0.915)	-	Cytoplasmiceffector	gb|TGO33115.1|	355	353	1	353	353	88	0	0	0	hypothetical protein BHYA_0265g00040 [Botrytis hyacinthi]	tig00000012_pilon_C.paspali	1031237	1032304
g5020.t1	Y(0.915)	-	Cytoplasmiceffector	gb|TGO66048.1|	355	353	1	353	353	88	0	0	0	hypothetical protein BELL_0980g00020 [Botrytis elliptica]	tig00000012_pilon_C.paspali	1031237	1032304
g5020.t1	Y(0.915)	-	Cytoplasmiceffector	gb|TGO83938.1|	355	353	1	353	353	90	0	0	0	hypothetical protein BPOR_0571g00020 [Botrytis porri]	tig00000012_pilon_C.paspali	1031237	1032304
g5020.t1	Y(0.915)	-	Cytoplasmiceffector	gb|THV50825.1|	355	353	1	353	353	91	0	0	0	hypothetical protein BGAL_0134g00070 [Botrytis galanthina]	tig00000012_pilon_C.paspali	1031237	1032304
g5020.t1	Y(0.915)	-	Cytoplasmiceffector	ref|XP_001554342.1|	355	352	1	353	353	87	1	1	0	hypothetical protein BCIN_02g09210 [Botrytis cinerea B05.10]	tig00000012_pilon_C.paspali	1031237	1032304
g5060.t1	Y(0.903)	-	Cytoplasmiceffector	gb|EMR86401.1|	122	266	1	122	122	11	0	0	3.74e-74	hypothetical protein BcDW1_4965 [Botrytis cinerea BcDW1]	tig00000012_pilon_C.paspali	1182554	1182922
g5060.t1	Y(0.903)	-	Cytoplasmiceffector	gb|PQE09527.1|	122	266	1	122	122	6	0	0	1.03e-76	Alpha beta hydrolase fold protein [Rutstroemia sp. NJR-2017a BBW]	tig00000012_pilon_C.paspali	1182554	1182922
g5060.t1	Y(0.903)	-	Cytoplasmiceffector	gb|PQE27493.1|	122	166	1	122	122	9	0	0	4.85e-75	alpha beta hydrolase fold protein [Rutstroemia sp. NJR-2017a BVV2]	tig00000012_pilon_C.paspali	1182554	1182922
g5060.t1	Y(0.903)	-	Cytoplasmiceffector	gb|PQE29713.1|	122	266	1	122	122	10	0	0	2.56e-73	Alpha beta hydrolase fold protein [Rutstroemia sp. NJR-2017a WRK4]	tig00000012_pilon_C.paspali	1182554	1182922
g5060.t1	Y(0.903)	-	Cytoplasmiceffector	gb|TEY30752.1|	122	266	1	122	122	9	0	0	3.62e-74	hypothetical protein BOTCAL_0847g00010 [Botryotinia calthae]	tig00000012_pilon_C.paspali	1182554	1182922
g5060.t1	Y(0.903)	-	Cytoplasmiceffector	gb|TGO09916.1|	122	266	1	122	122	11	0	0	1.39e-73	hypothetical protein BTUL_0150g00220 [Botrytis tulipae]	tig00000012_pilon_C.paspali	1182554	1182922
g5060.t1	Y(0.903)	-	Cytoplasmiceffector	gb|TGO33582.1|	122	266	1	122	122	9	0	0	3.03e-75	hypothetical protein BHYA_0238g00070 [Botrytis hyacinthi]	tig00000012_pilon_C.paspali	1182554	1182922
g5060.t1	Y(0.903)	-	Cytoplasmiceffector	gb|TGO70289.1|	122	266	1	122	122	8	0	0	2.75e-75	hypothetical protein BOTNAR_0002g00740 [Botryotinia narcissicola]	tig00000012_pilon_C.paspali	1182554	1182922
g5060.t1	Y(0.903)	-	Cytoplasmiceffector	gb|THV48969.1|	122	266	1	122	122	9	0	0	9.65e-75	hypothetical protein BGAL_0218g00120 [Botrytis galanthina]	tig00000012_pilon_C.paspali	1182554	1182922
g5060.t1	Y(0.903)	-	Cytoplasmiceffector	ref|XP_024549283.1|	122	266	1	122	122	12	0	0	1.75e-73	hypothetical protein BCIN_06g04040 [Botrytis cinerea B05.10]	tig00000012_pilon_C.paspali	1182554	1182922
g5080.t1	Y(0.905)	-	Cytoplasmiceffector	dbj|GAC73878.1|	175	261	5	174	172	107	2	3	1.44e-30	hypothetical protein PANT_9c00348 [Moesziomyces antarcticus T-34]	tig00000013_pilon_C.paspali	185284	185811
g5080.t1	Y(0.905)	-	Cytoplasmiceffector	dbj|GCB24970.1|	175	269	5	171	177	100	4	11	1.1e-27	hypothetical protein AAWM_07855 [Aspergillus awamori]	tig00000013_pilon_C.paspali	185284	185811
g5080.t1	Y(0.905)	-	Cytoplasmiceffector	emb|SPB49188.1|	175	270	5	170	180	97	5	15	9.83e-28	unnamed protein product [Aspergillus niger]	tig00000013_pilon_C.paspali	185284	185811
g5080.t1	Y(0.905)	-	Cytoplasmiceffector	gb|EHA22180.1|	175	323	1	170	184	98	6	16	1.92e-27	hypothetical protein ASPNIDRAFT_40899 [Aspergillus niger ATCC 1015]	tig00000013_pilon_C.paspali	185284	185811
g5080.t1	Y(0.905)	-	Cytoplasmiceffector	gb|ETS63880.1|	175	261	5	174	172	109	2	3	8.8e-30	hypothetical protein PaG_02203 [Moesziomyces aphidis DSM 70725]	tig00000013_pilon_C.paspali	185284	185811
g5080.t1	Y(0.905)	-	Cytoplasmiceffector	gb|KZM22223.1|	175	277	5	134	137	69	4	7	1.46e-27	hypothetical protein ST47_g6635 [Ascochyta rabiei]	tig00000013_pilon_C.paspali	185284	185811
g5080.t1	Y(0.905)	-	Cytoplasmiceffector	gb|RDK44386.1|	175	269	5	171	177	101	4	11	3.72e-27	hypothetical protein M752DRAFT_313214 [Aspergillus phoenicis ATCC 13157]	tig00000013_pilon_C.paspali	185284	185811
g5080.t1	Y(0.905)	-	Cytoplasmiceffector	ref|XP_014659318.1|	175	261	3	174	174	109	2	3	1.77e-31	conserved hypothetical protein [Moesziomyces antarcticus]	tig00000013_pilon_C.paspali	185284	185811
g5080.t1	Y(0.905)	-	Cytoplasmiceffector	ref|XP_025566457.1|	175	267	3	170	183	98	5	19	1.12e-27	hypothetical protein BO88DRAFT_441251 [Aspergillus vadensis CBS 113365]	tig00000013_pilon_C.paspali	185284	185811
g5080.t1	Y(0.905)	-	Cytoplasmiceffector	ref|XP_026623176.1|	175	269	5	171	177	99	4	11	1.26e-28	hypothetical protein BDQ94DRAFT_181745 [Aspergillus welwitschiae]	tig00000013_pilon_C.paspali	185284	185811
g5090.t1	Y(0.917)	-	Cytoplasmiceffector	gb|APA15468.1|	108	524	1	105	105	24	0	0	5.57e-44	hypothetical protein sscle_15g102380 [Sclerotinia sclerotiorum 1980 UF-70]	tig00000013_pilon_C.paspali	214328	214654
g5090.t1	Y(0.917)	-	Cytoplasmiceffector	gb|POS81268.1|	108	537	1	107	108	55	1	1	4.29e-27	hypothetical protein DHEL01_v200318 [Diaporthe helianthi]	tig00000013_pilon_C.paspali	214328	214654
g5090.t1	Y(0.917)	-	Cytoplasmiceffector	gb|PQE18245.1|	108	582	1	73	73	15	0	0	7e-33	heterokaryon incompatibility protein [Rutstroemia sp. NJR-2017a BBW]	tig00000013_pilon_C.paspali	214328	214654
g5090.t1	Y(0.917)	-	Cytoplasmiceffector	gb|RDL37426.1|	108	480	1	108	108	28	0	0	2.01e-49	hypothetical protein BP5553_04859 [Phialophora cf. hyalina BP 5553]	tig00000013_pilon_C.paspali	214328	214654
g5090.t1	Y(0.917)	-	Cytoplasmiceffector	gb|RMJ08998.1|	108	325	1	107	108	54	1	1	2.26e-26	hypothetical protein CDV36_011388 [Fusarium kuroshium]	tig00000013_pilon_C.paspali	214328	214654
g5090.t1	Y(0.917)	-	Cytoplasmiceffector	gb|RTE71820.1|	108	325	1	107	108	54	1	1	2.26e-26	hypothetical protein BHE90_013774 [Fusarium euwallaceae]	tig00000013_pilon_C.paspali	214328	214654
g5090.t1	Y(0.917)	-	Cytoplasmiceffector	gb|TAQ91129.1|	108	1291	1	108	108	34	0	0	1e-41	hypothetical protein B7494_g575 [Chlorociboria aeruginascens]	tig00000013_pilon_C.paspali	214328	214654
g5090.t1	Y(0.917)	-	Cytoplasmiceffector	ref|XP_001585509.1|	108	564	1	105	105	24	0	0	4.65e-44	predicted protein [Sclerotinia sclerotiorum 1980 UF-70]	tig00000013_pilon_C.paspali	214328	214654
g5090.t1	Y(0.917)	-	Cytoplasmiceffector	ref|XP_007291664.1|	108	368	3	105	103	47	0	0	2.25e-31	heterokaryon incompatibility protein [Marssonina brunnea f. sp. 'multigermtubi' MB_m1]	tig00000013_pilon_C.paspali	214328	214654
g5090.t1	Y(0.917)	-	Cytoplasmiceffector	ref|XP_008081049.1|	108	409	1	105	105	45	0	0	9.35e-37	hypothetical protein GLAREA_12076 [Glarea lozoyensis ATCC 20868]	tig00000013_pilon_C.paspali	214328	214654
g5124.t1	Y(0.902)	-	Cytoplasmiceffector	gb|ESZ93298.1|	127	156	12	116	109	57	1	4	2.84e-20	hypothetical protein SBOR_6336 [Sclerotinia borealis F-4128]	tig00000013_pilon_C.paspali	302778	303161
g5124.t1	Y(0.902)	-	Cytoplasmiceffector	gb|PQE13597.1|	127	76	63	127	65	16	0	0	5.49e-29	hypothetical protein CJF31_00005013 [Rutstroemia sp. NJR-2017a BVV2]	tig00000013_pilon_C.paspali	302778	303161
g5124.t1	Y(0.902)	-	Cytoplasmiceffector	ref|WP_106005848.1|	127	696	16	127	121	77	4	15	8.8	type I DNA topoisomerase [Moorella humiferrea]	tig00000013_pilon_C.paspali	302778	303161
g5124.t1	Y(0.902)	-	Cytoplasmiceffector	ref|WP_135644756.1|	127	91	48	110	63	44	0	0	5.4	hypothetical protein [Leptospira langatensis]	tig00000013_pilon_C.paspali	302778	303161
g5124.t1	Y(0.902)	-	Cytoplasmiceffector	ref|XP_007667850.1|	127	776	3	123	125	81	2	12	0.24	protein bicaudal D homolog 2-like [Ornithorhynchus anatinus]	tig00000013_pilon_C.paspali	302778	303161
g5239.t1	Y(0.981)	-	Cytoplasmiceffector	gb|APA13011.1|	193	191	1	193	193	41	2	2	1.69e-103	hypothetical protein sscle_10g077810 [Sclerotinia sclerotiorum 1980 UF-70]	tig00000013_pilon_C.paspali	654312	654963
g5239.t1	Y(0.981)	-	Cytoplasmiceffector	gb|PQE10294.1|	193	193	1	193	193	16	0	0	9.5e-128	Rpp14 family protein [Rutstroemia sp. NJR-2017a WRK4]	tig00000013_pilon_C.paspali	654312	654963
g5239.t1	Y(0.981)	-	Cytoplasmiceffector	gb|TEY85804.1|	193	191	1	193	193	40	2	2	1.44e-105	hypothetical protein BOTCAL_0012g00220 [Botryotinia calthae]	tig00000013_pilon_C.paspali	654312	654963
g5239.t1	Y(0.981)	-	Cytoplasmiceffector	gb|TGO15733.1|	193	191	1	193	193	41	2	2	1.4e-104	hypothetical protein BTUL_0036g00240 [Botrytis tulipae]	tig00000013_pilon_C.paspali	654312	654963
g5239.t1	Y(0.981)	-	Cytoplasmiceffector	gb|TGO26947.1|	193	191	1	193	193	43	2	2	1.23e-102	hypothetical protein BPAE_0050g00360 [Botrytis paeoniae]	tig00000013_pilon_C.paspali	654312	654963
g5239.t1	Y(0.981)	-	Cytoplasmiceffector	gb|TGO41955.1|	193	191	1	193	193	43	2	2	5.23e-103	hypothetical protein BHYA_0014g00380 [Botrytis hyacinthi]	tig00000013_pilon_C.paspali	654312	654963
g5239.t1	Y(0.981)	-	Cytoplasmiceffector	gb|TGO65784.1|	193	190	1	193	193	40	2	3	6.09e-104	hypothetical protein BCON_0001g01000 [Botryotinia convoluta]	tig00000013_pilon_C.paspali	654312	654963
g5239.t1	Y(0.981)	-	Cytoplasmiceffector	gb|TGO78068.1|	193	191	1	193	193	42	2	2	1.62e-103	hypothetical protein BELL_0080g00170 [Botrytis elliptica]	tig00000013_pilon_C.paspali	654312	654963
g5239.t1	Y(0.981)	-	Cytoplasmiceffector	gb|TGO91780.1|	193	191	1	193	193	42	2	2	7.51e-103	hypothetical protein BPOR_0019g00400 [Botrytis porri]	tig00000013_pilon_C.paspali	654312	654963
g5239.t1	Y(0.981)	-	Cytoplasmiceffector	gb|THV49163.1|	193	191	1	193	193	40	2	2	7.6e-105	hypothetical protein BGAL_0208g00140 [Botrytis galanthina]	tig00000013_pilon_C.paspali	654312	654963
g5242.t1	Y(0.958)	-	Cytoplasmiceffector	emb|CZS88629.1|	115	115	1	115	115	11	0	0	2.58e-72	probable TFIIA subunit [transcription initiation factor] [Rhynchosporium agropyri]	tig00000013_pilon_C.paspali	659992	660464
g5242.t1	Y(0.958)	-	Cytoplasmiceffector	gb|PMD18910.1|	115	115	1	115	115	11	0	0	2.7e-72	transcription initiation factor-like protein IIA gamma chain [Pezoloma ericae]	tig00000013_pilon_C.paspali	659992	660464
g5242.t1	Y(0.958)	-	Cytoplasmiceffector	gb|PMD36083.1|	115	115	1	115	115	11	0	0	1.9e-72	transcription initiation factor-like protein IIA gamma chain [Hyaloscypha variabilis F]	tig00000013_pilon_C.paspali	659992	660464
g5242.t1	Y(0.958)	-	Cytoplasmiceffector	gb|PQE03798.1|	115	136	1	115	136	0	1	21	3.44e-75	putative TFIIA subunit [transcription initiation factor] protein [Rutstroemia sp. NJR-2017a BBW]	tig00000013_pilon_C.paspali	659992	660464
g5242.t1	Y(0.958)	-	Cytoplasmiceffector	gb|TGO78065.1|	115	114	1	115	115	8	1	1	4.88e-72	hypothetical protein BELL_0080g00140 [Botrytis elliptica]	tig00000013_pilon_C.paspali	659992	660464
g5242.t1	Y(0.958)	-	Cytoplasmiceffector	gb|TGO91776.1|	115	114	1	115	115	7	1	1	2.91e-72	hypothetical protein BPOR_0019g00360 [Botrytis porri]	tig00000013_pilon_C.paspali	659992	660464
g5242.t1	Y(0.958)	-	Cytoplasmiceffector	ref|XP_007289888.1|	115	115	1	115	115	9	0	0	5.98e-74	transcription initiation factor IIA gamma chain [Marssonina brunnea f. sp. 'multigermtubi' MB_m1]	tig00000013_pilon_C.paspali	659992	660464
g5242.t1	Y(0.958)	-	Cytoplasmiceffector	ref|XP_024552224.1|	115	114	1	115	115	7	1	1	1.54e-72	Bctoa2 [Botrytis cinerea B05.10]	tig00000013_pilon_C.paspali	659992	660464
g5242.t1	Y(0.958)	-	Cytoplasmiceffector	ref|XP_024720118.1|	115	115	1	115	115	11	0	0	1.44e-72	hypothetical protein M430DRAFT_19589 [Amorphotheca resinae ATCC 22711]	tig00000013_pilon_C.paspali	659992	660464
g5242.t1	Y(0.958)	-	Cytoplasmiceffector	ref|XP_024739736.1|	115	115	1	115	115	10	0	0	5.55e-73	transcription initiation factor-like protein IIA gamma chain [Meliniomyces bicolor E]	tig00000013_pilon_C.paspali	659992	660464
g5251.t1	Y(0.981)	-	Cytoplasmiceffector	emb|CZR64953.1|	104	104	1	104	104	5	0	0	1.63e-65	heat shock protein, mitochondrial [Phialocephala subalpina]	tig00000013_pilon_C.paspali	680801	681451
g5251.t1	Y(0.981)	-	Cytoplasmiceffector	gb|EMR84254.1|	104	117	2	104	103	4	0	0	2.45e-64	putative 10 kda heat shock mitochondrial protein [Botrytis cinerea BcDW1]	tig00000013_pilon_C.paspali	680801	681451
g5251.t1	Y(0.981)	-	Cytoplasmiceffector	gb|ESZ97681.1|	104	104	1	104	104	5	0	0	1.19e-64	heat shock protein [Sclerotinia borealis F-4128]	tig00000013_pilon_C.paspali	680801	681451
g5251.t1	Y(0.981)	-	Cytoplasmiceffector	gb|RAL65621.1|	104	104	1	104	104	4	0	0	2.88e-65	hypothetical protein DID88_005293 [Monilinia fructigena]	tig00000013_pilon_C.paspali	680801	681451
g5251.t1	Y(0.981)	-	Cytoplasmiceffector	gb|TEY85779.1|	104	106	2	104	103	3	0	0	5.68e-65	hypothetical protein BOTCAL_0012g00350 [Botryotinia calthae]	tig00000013_pilon_C.paspali	680801	681451
g5251.t1	Y(0.981)	-	Cytoplasmiceffector	gb|TGO15747.1|	104	117	2	104	103	3	0	0	5.38e-65	hypothetical protein BTUL_0036g00380 [Botrytis tulipae]	tig00000013_pilon_C.paspali	680801	681451
g5251.t1	Y(0.981)	-	Cytoplasmiceffector	gb|TGO26933.1|	104	104	1	104	104	3	0	0	6.91e-66	hypothetical protein BPAE_0050g00220 [Botrytis paeoniae]	tig00000013_pilon_C.paspali	680801	681451
g5251.t1	Y(0.981)	-	Cytoplasmiceffector	gb|TGO91765.1|	104	104	1	104	104	4	0	0	2.26e-65	hypothetical protein BPOR_0019g00250 [Botrytis porri]	tig00000013_pilon_C.paspali	680801	681451
g5251.t1	Y(0.981)	-	Cytoplasmiceffector	ref|XP_001552212.1|	104	104	1	104	104	4	0	0	2.88e-65	Bchsp10 [Botrytis cinerea B05.10]	tig00000013_pilon_C.paspali	680801	681451
g5251.t1	Y(0.981)	-	Cytoplasmiceffector	ref|XP_001590752.1|	104	104	1	104	104	6	0	0	2.15e-64	hypothetical protein SS1G_08492 [Sclerotinia sclerotiorum 1980 UF-70]	tig00000013_pilon_C.paspali	680801	681451
g5257.t1	Y(0.965)	-	Cytoplasmiceffector	gb|ESZ97675.1|	173	173	1	173	173	21	0	0	4.8e-93	import receptor subunit tom-20 [Sclerotinia borealis F-4128]	tig00000013_pilon_C.paspali	694509	695212
g5257.t1	Y(0.965)	-	Cytoplasmiceffector	gb|KFY68828.1|	173	174	1	173	174	29	1	1	2.18e-93	hypothetical protein V496_00783 [Pseudogymnoascus sp. VKM F-4515 (FW-2607)]	tig00000013_pilon_C.paspali	694509	695212
g5257.t1	Y(0.965)	-	Cytoplasmiceffector	gb|KIN00491.1|	173	173	1	173	173	38	0	0	4.5e-96	hypothetical protein OIDMADRAFT_19552 [Oidiodendron maius Zn]	tig00000013_pilon_C.paspali	694509	695212
g5257.t1	Y(0.965)	-	Cytoplasmiceffector	gb|PQE03822.1|	173	194	1	173	194	2	1	21	8.26e-116	putative mitochondrial import receptor subunit tom-20 protein [Rutstroemia sp. NJR-2017a BBW]	tig00000013_pilon_C.paspali	694509	695212
[truncated: 1,173 more rows]

## Sheet: Table S4
Table S4. Structure prediction and validation of the virulence genes. Details of the template used, confidence and coverage of the models predicted along with the quality assessment and model validation values are tabulated. The proteins having coverage > 80 were selected for comparative analyses.
[truncated: 25 more rows]

[truncated: 2 more sheets: Table S5, Figure S1]
